# Supplementary material
Source: PubMed Central journal article supplement (PMC7684580)

# Four phosphates at one blow: access to pentaphosphorylated magic spot nucleotides and their analysis by capillary electrophoresis

Thomas M. Haas<sup>‡a</sup>, Danye Qiu<sup>‡a</sup>, Markus Häner<sup>a</sup>, Larissa Angebauer<sup>b,c</sup>, Alexander Ripp<sup>a</sup>, Jyoti Singh<sup>a</sup>, Hans-Georg Koch<sup>b</sup>, Claudia Jessen-Trefzer<sup>d</sup>, and Henning J. Jessen<sup>\*ae</sup>

<sup>a</sup> Institute of Organic Chemistry, University of Freiburg, 79104 Freiburg, Germany.

<sup>b</sup> Institute of Biochemistry and Molecular Biology, Faculty of Medicine, University of Freiburg, 79104 Freiburg, Germany.

<sup>c</sup> Faculty of Biology, University of Freiburg, 79104 Freiburg, Germany.

<sup>d</sup> Institute of Pharmaceutical Biology and Biotechnology, University of Freiburg, 79104 Freiburg, Germany.

<sup>e</sup> CIBSS – Centre for Integrative Biological Signaling Studies, University of Freiburg, 79104 Freiburg, Germany.

\* Henning J. Jessen. E-mail: [henning.jessen@ocbc.uni-freiburg.de](mailto:henning.jessen@ocbc.uni-freiburg.de)

‡These authors contributed equally.

## Supporting Information:

**Fig. S1** Influence of the salt concentration on the separation of ten nucleotide standards.

**Fig. S2** Influence of pH on the separation of ten nucleotide standards.

**Fig.S3** Electropherogram of *E. Coli* cell extracts before (black) and 1h after adding SHX (red).

**NMR-spectra**

**MS-spectra**

**HPLC-MS-data**

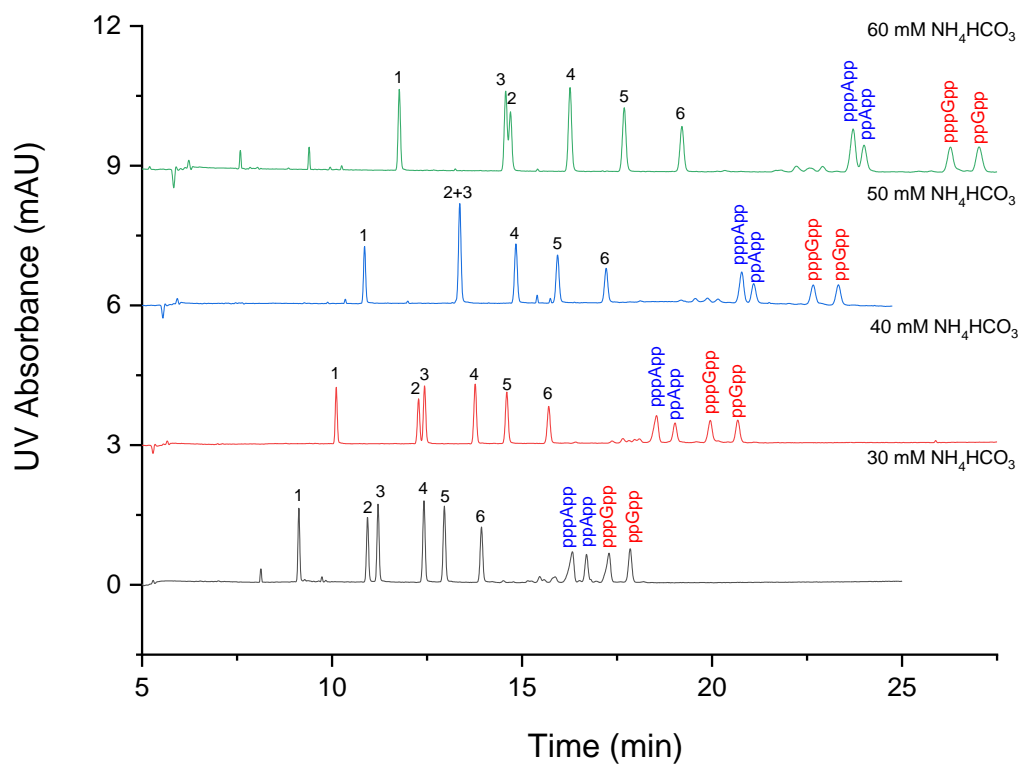

**Fig. S1** Influence of the salt concentration on the separation of ten nucleotide standards: AMP (1), GMP (2), ADP (3), ATP (4), GDP (5), GTP (6). Composition of the running buffer: 30-60 mM ammonium bicarbonate titrated by ammonium hydroxide solution to pH 10.1. Other conditions as in Fig.3.

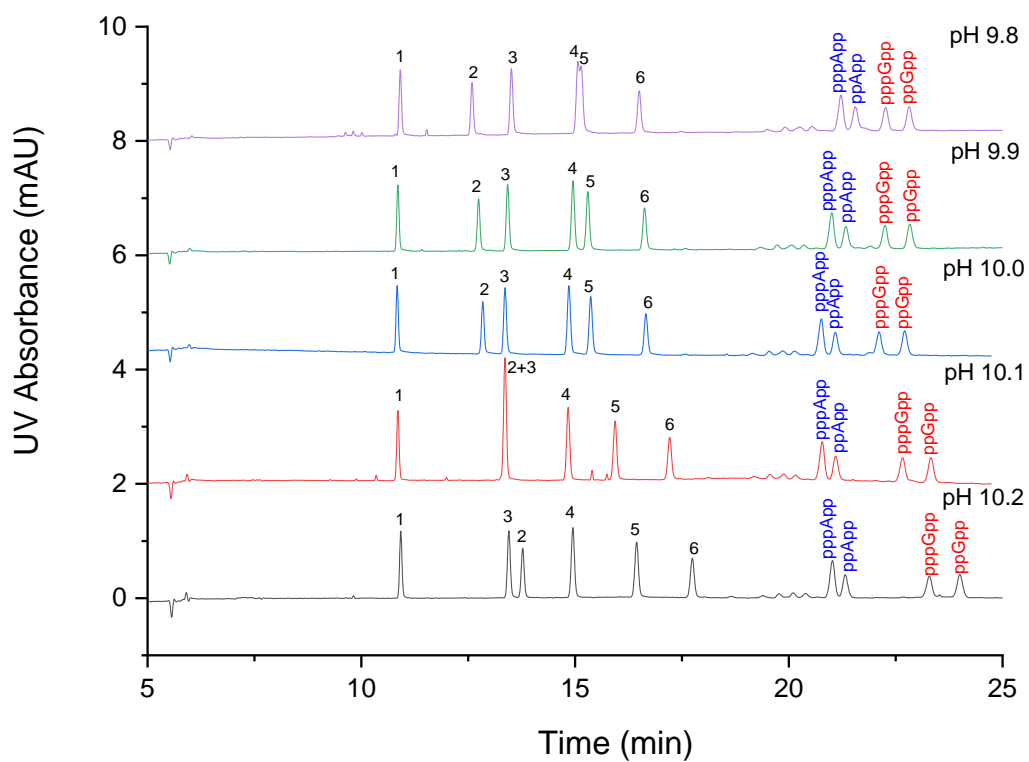

**Fig. S2** Influence of pH on the separation of ten nucleotide standards: AMP (1), GMP (2), ADP (3), ATP (4), GDP (5), GTP (6). Composition of the running buffer: 50 mM ammonium bicarbonate titrated by ammonium hydroxide solution to pH 9.8-10.2. Other conditions as in Fig.3.

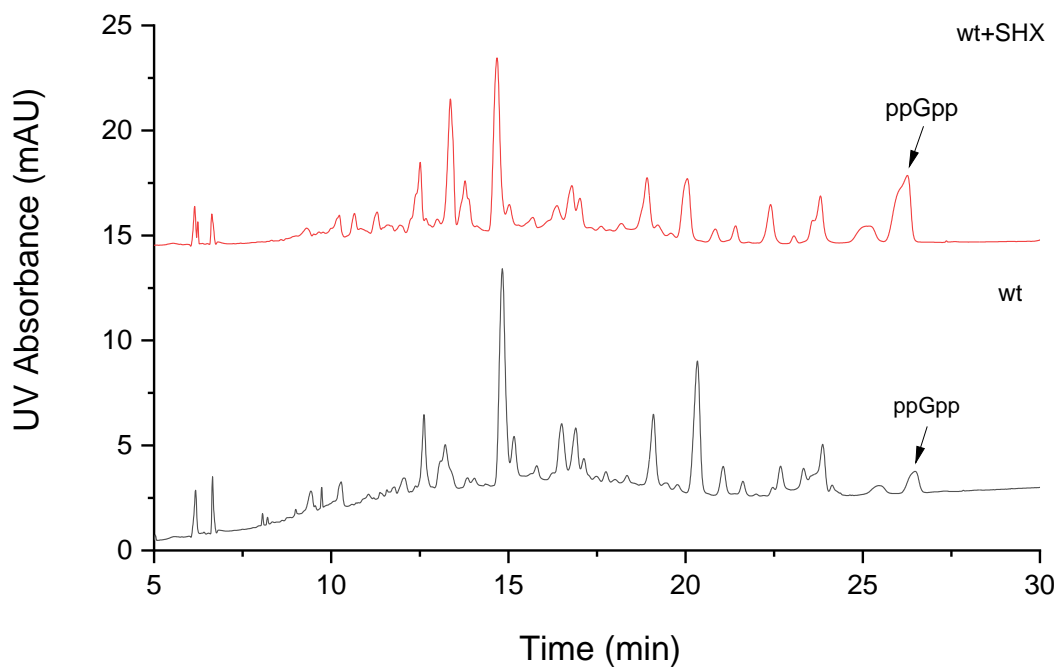

**Fig.S3** Electropherogram of *E. Coli* cell extracts before (black) and 1h after adding SHX (red).

Composition of the running buffer: 50 mM ammonium bicarbonate titrated by ammonium hydroxide solution to pH 10.0; Separation voltage: 18 kV; UV detection at 250 nm; Temperature: 25 °C; Injection: 100 mbar, 5s.

**Compound 11 (propargylamido-pppAp),  $^1\text{H}$  - NMR ( $\text{D}_2\text{O}$ , 400 MHz)**

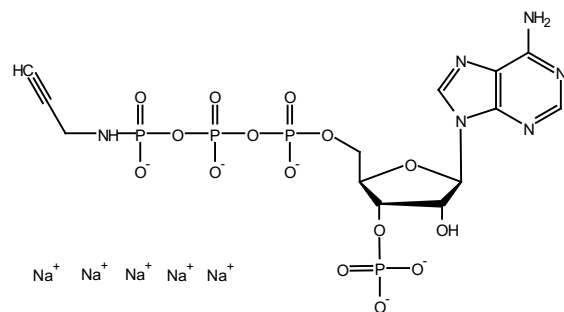

**11**

The PN-bond is proven by signal D (propargylamino- $\text{CH}_2$ -group) showing H-P coupling (compare  $^1\text{H}\{^31\text{P}\}$ -spectrum).

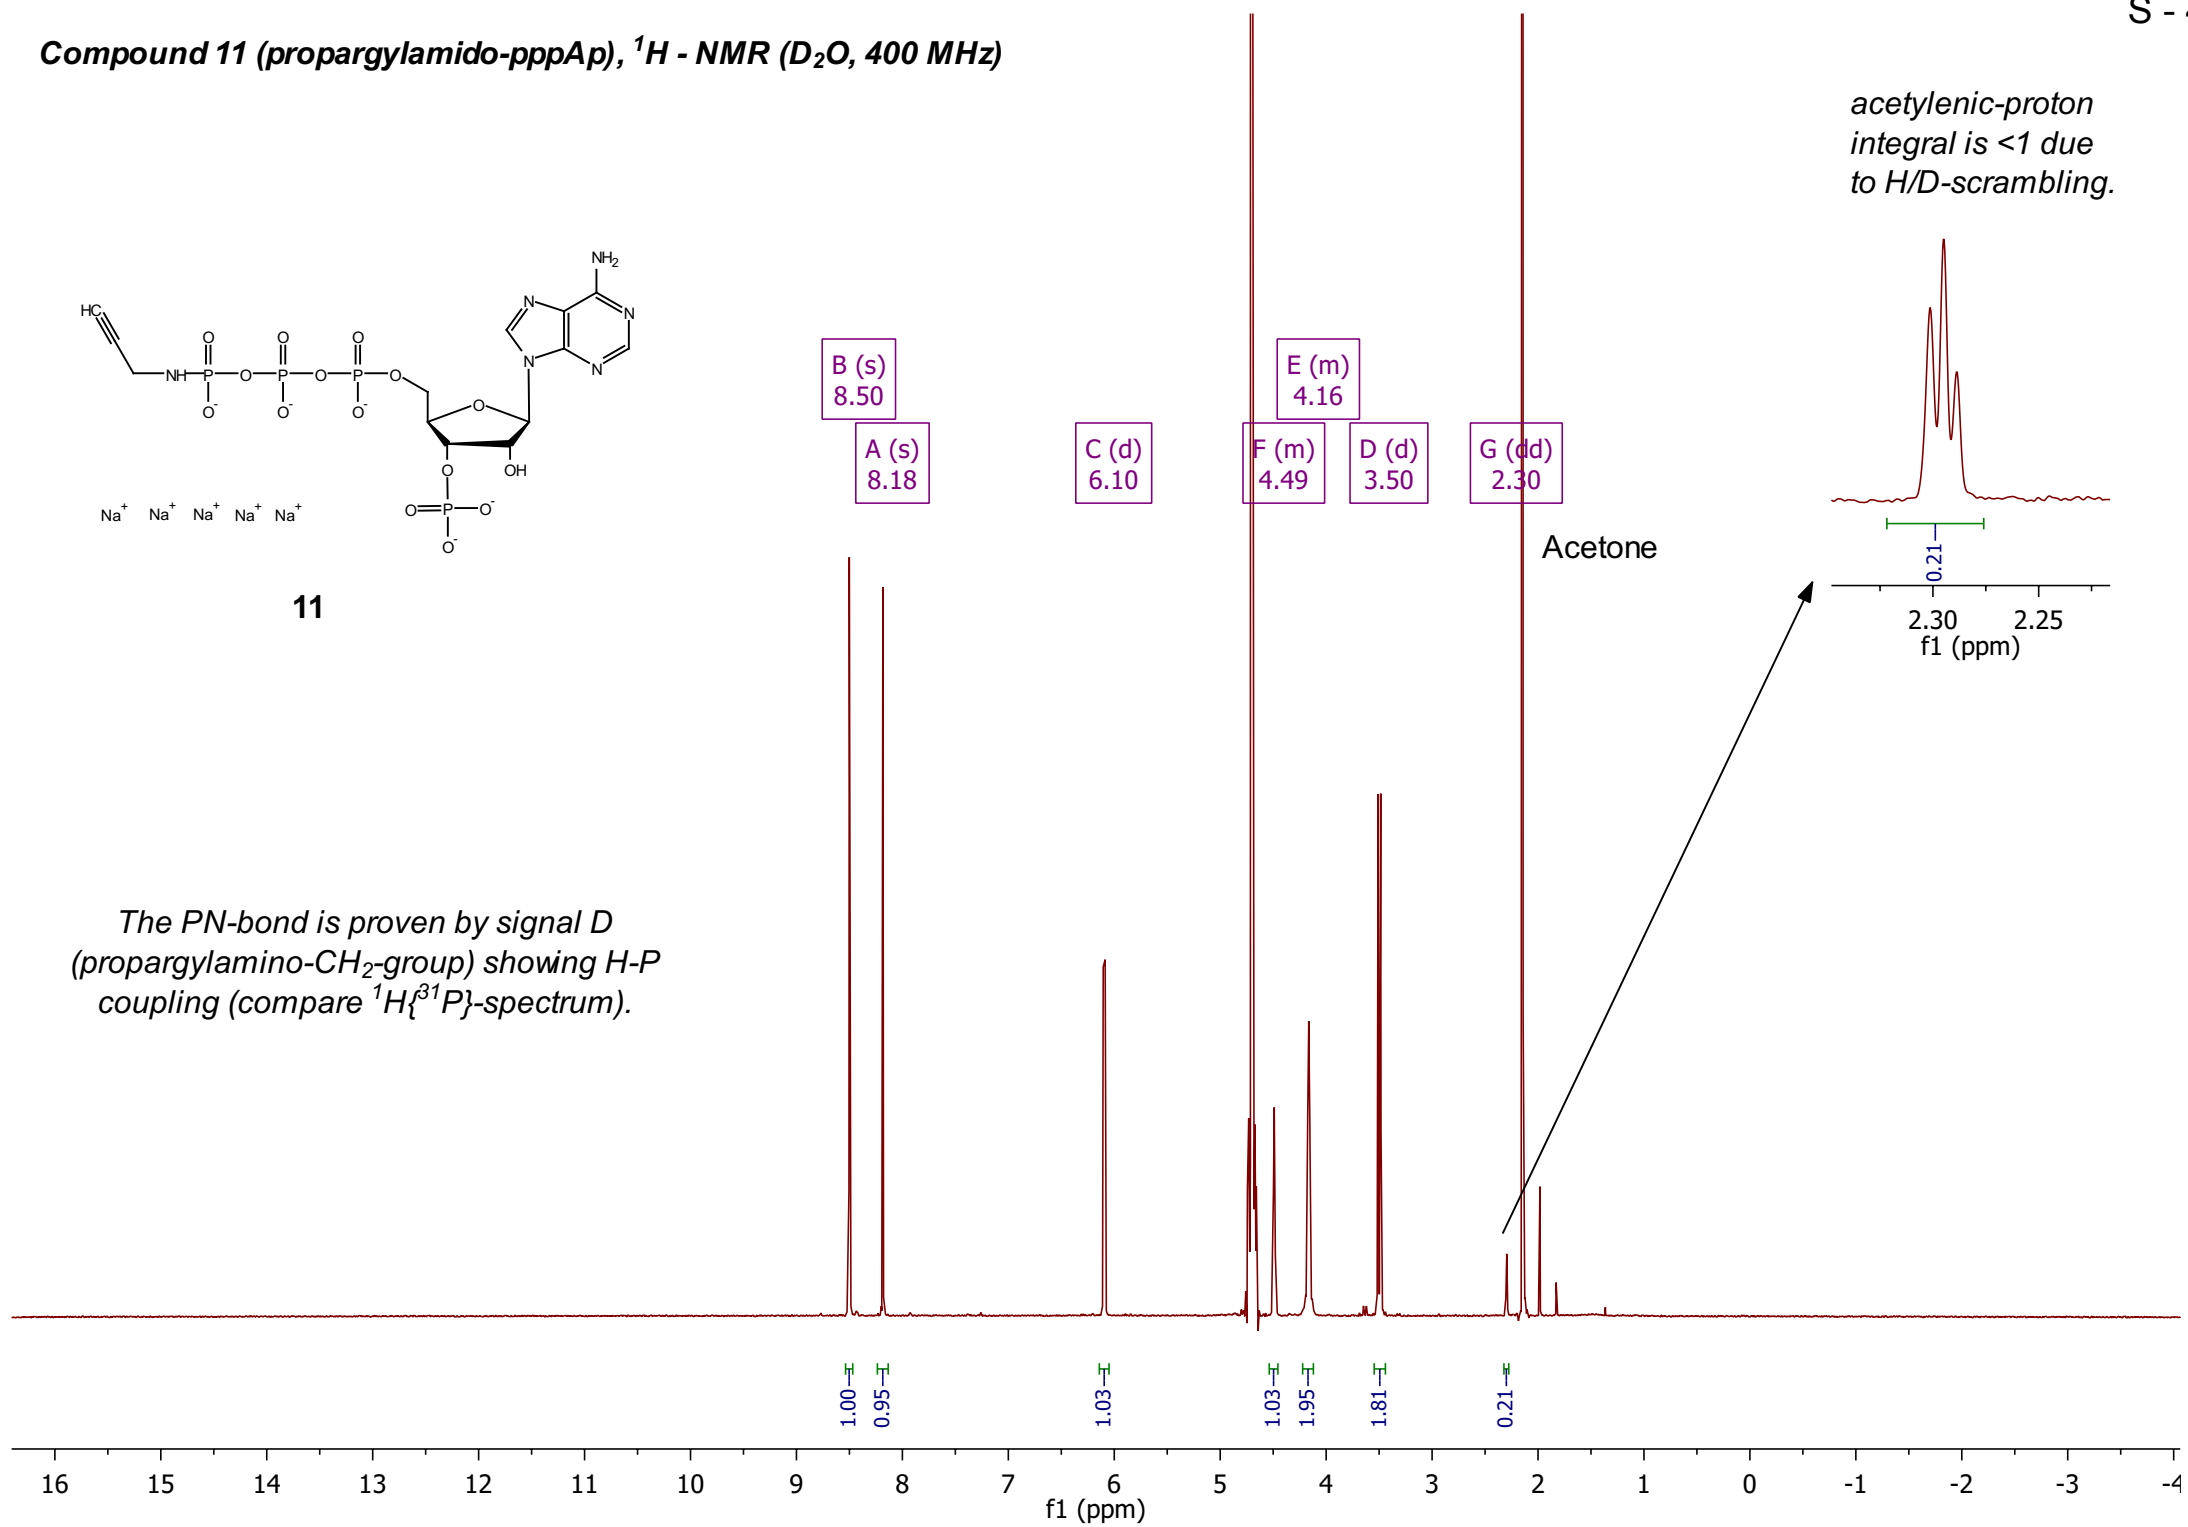

Compound 11 (propargylamido-pppAp), <sup>1</sup>H [<sup>31</sup>P]-NMR (D<sub>2</sub>O, 400 MHz)

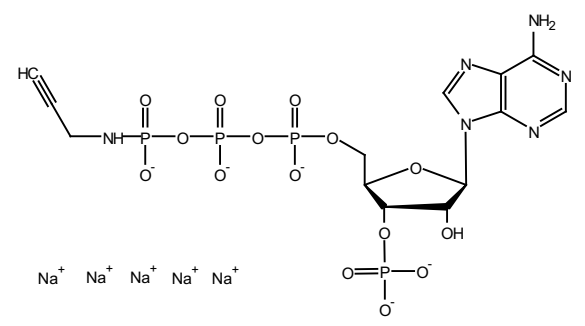

11

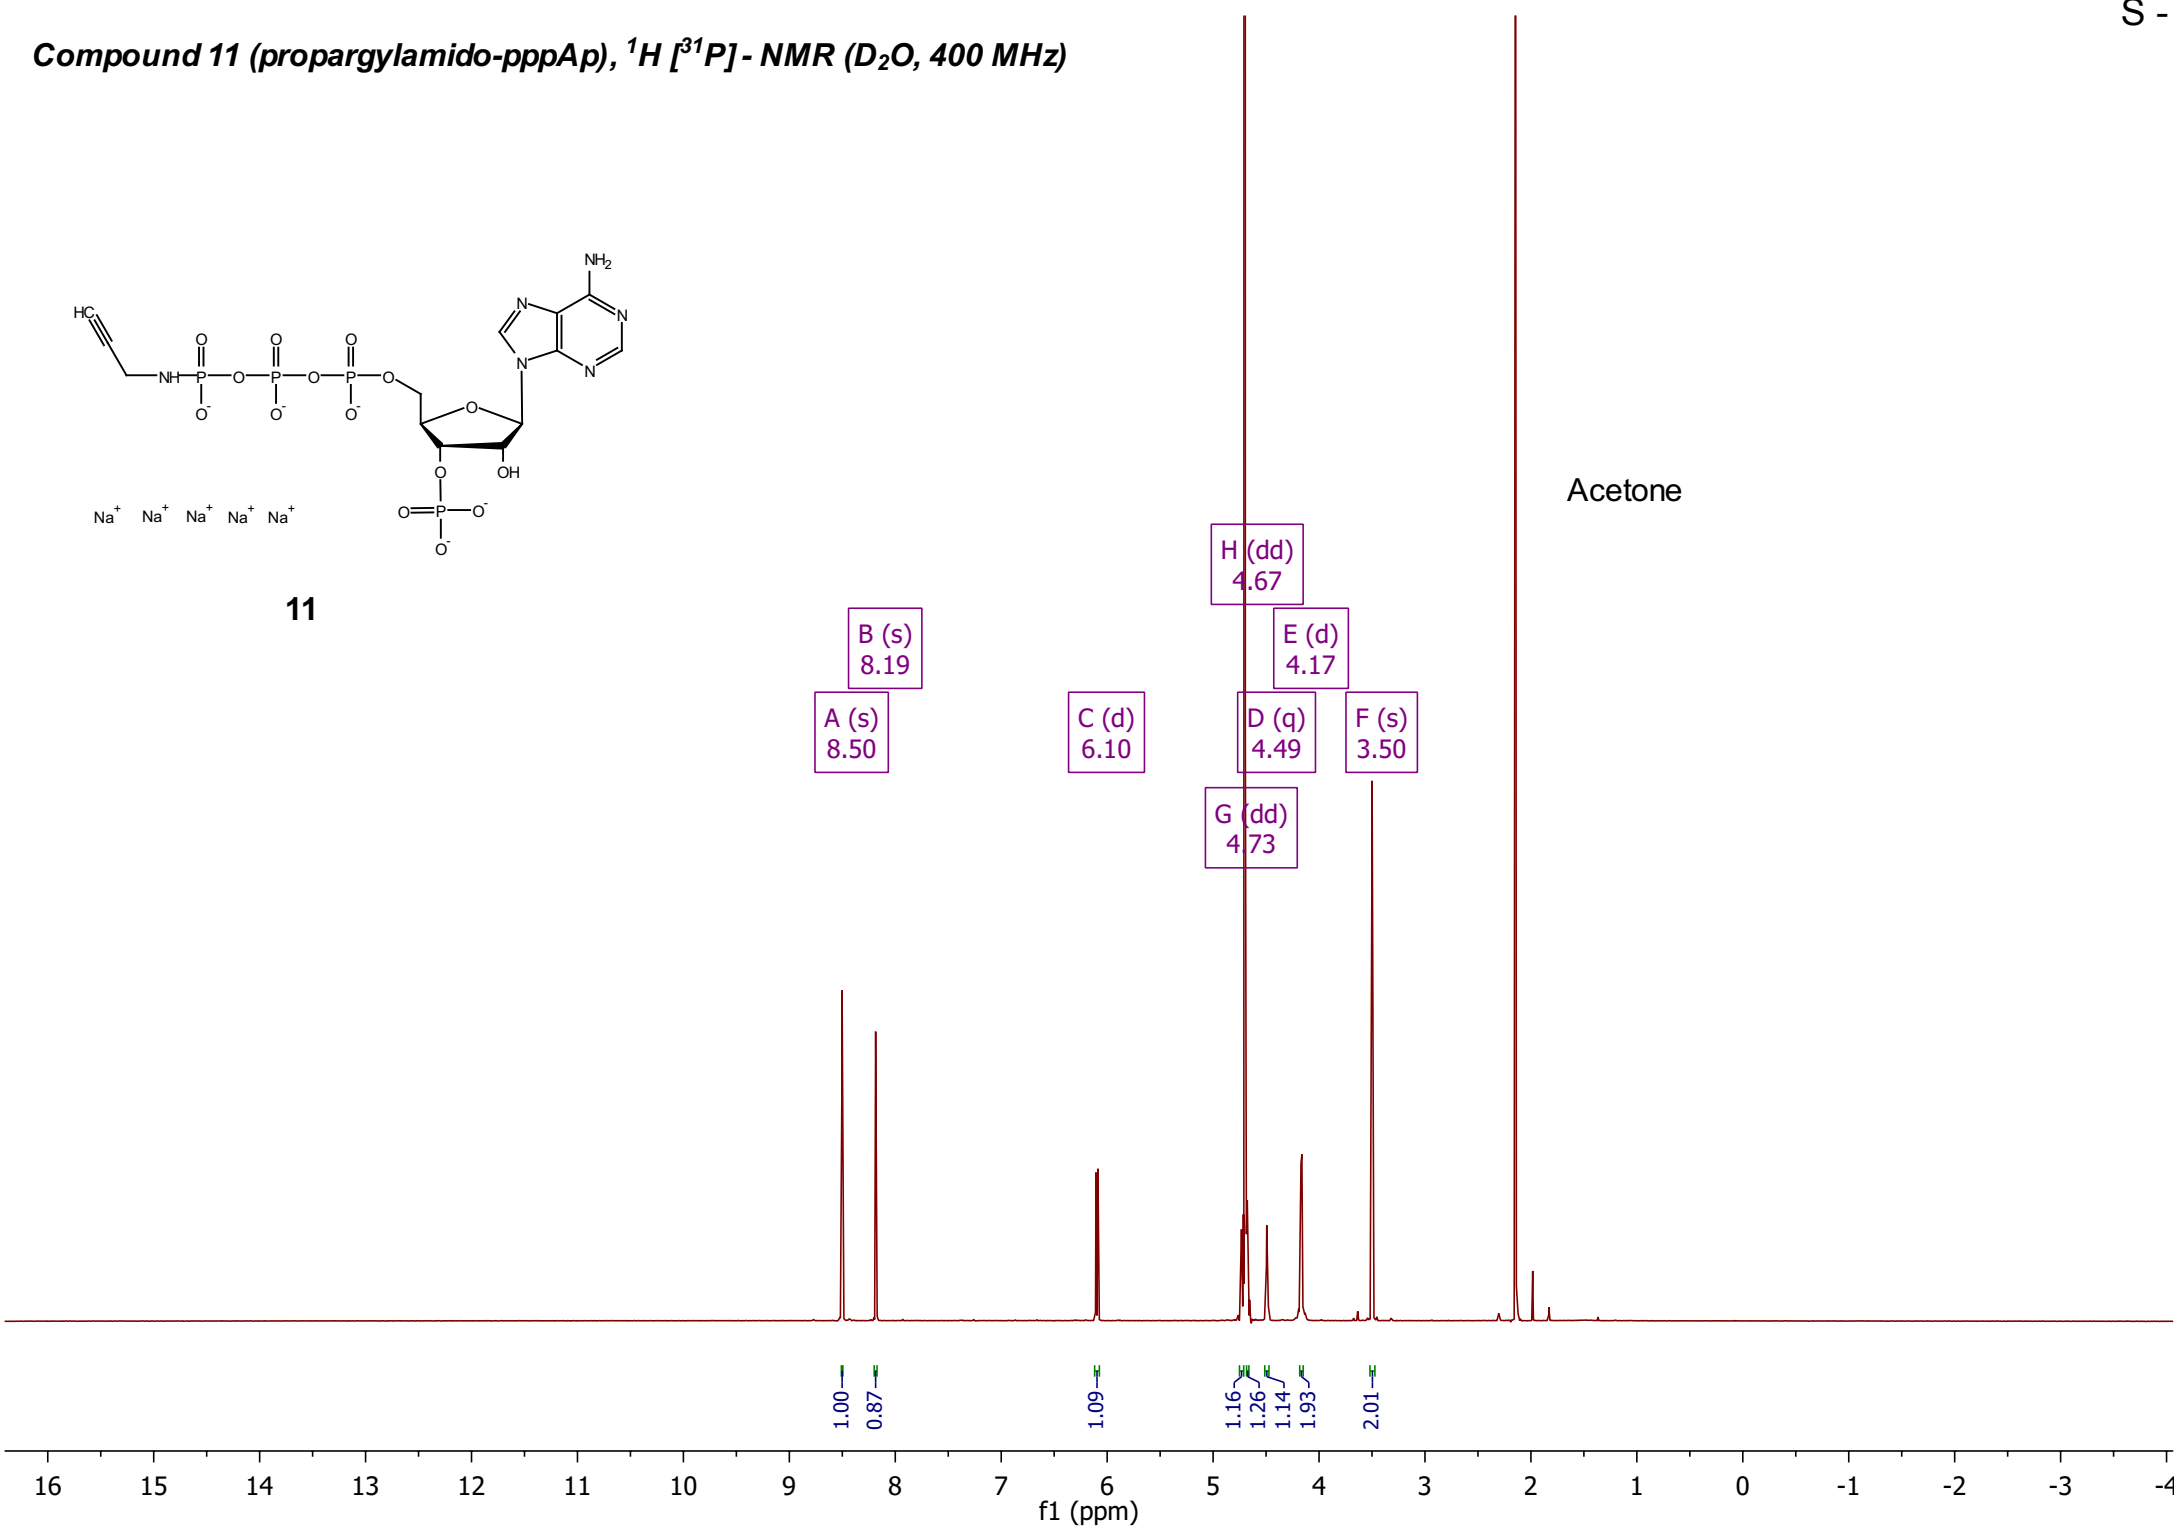

A (s)  
8.50

B (s)  
8.19

C (d)  
6.10

G (dd)  
4.73

H (dd)  
4.67

D (q)  
4.49

E (d)  
4.17

F (s)  
3.50

Acetone

1.00  
0.87

1.09

1.16  
1.26  
1.14  
1.93

2.01

16 15 14 13 12 11 10 9 8 7 6 5 4 3 2 1 0 -1 -2 -3 -4  
f1 (ppm)

Compound 11 (propargylamido-pppAp),  $^{31}\text{P}$  [ $^1\text{H}$ ]-NMR ( $\text{D}_2\text{O}$ , 162 MHz)

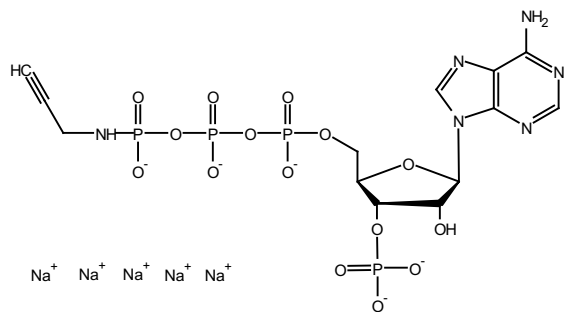

11

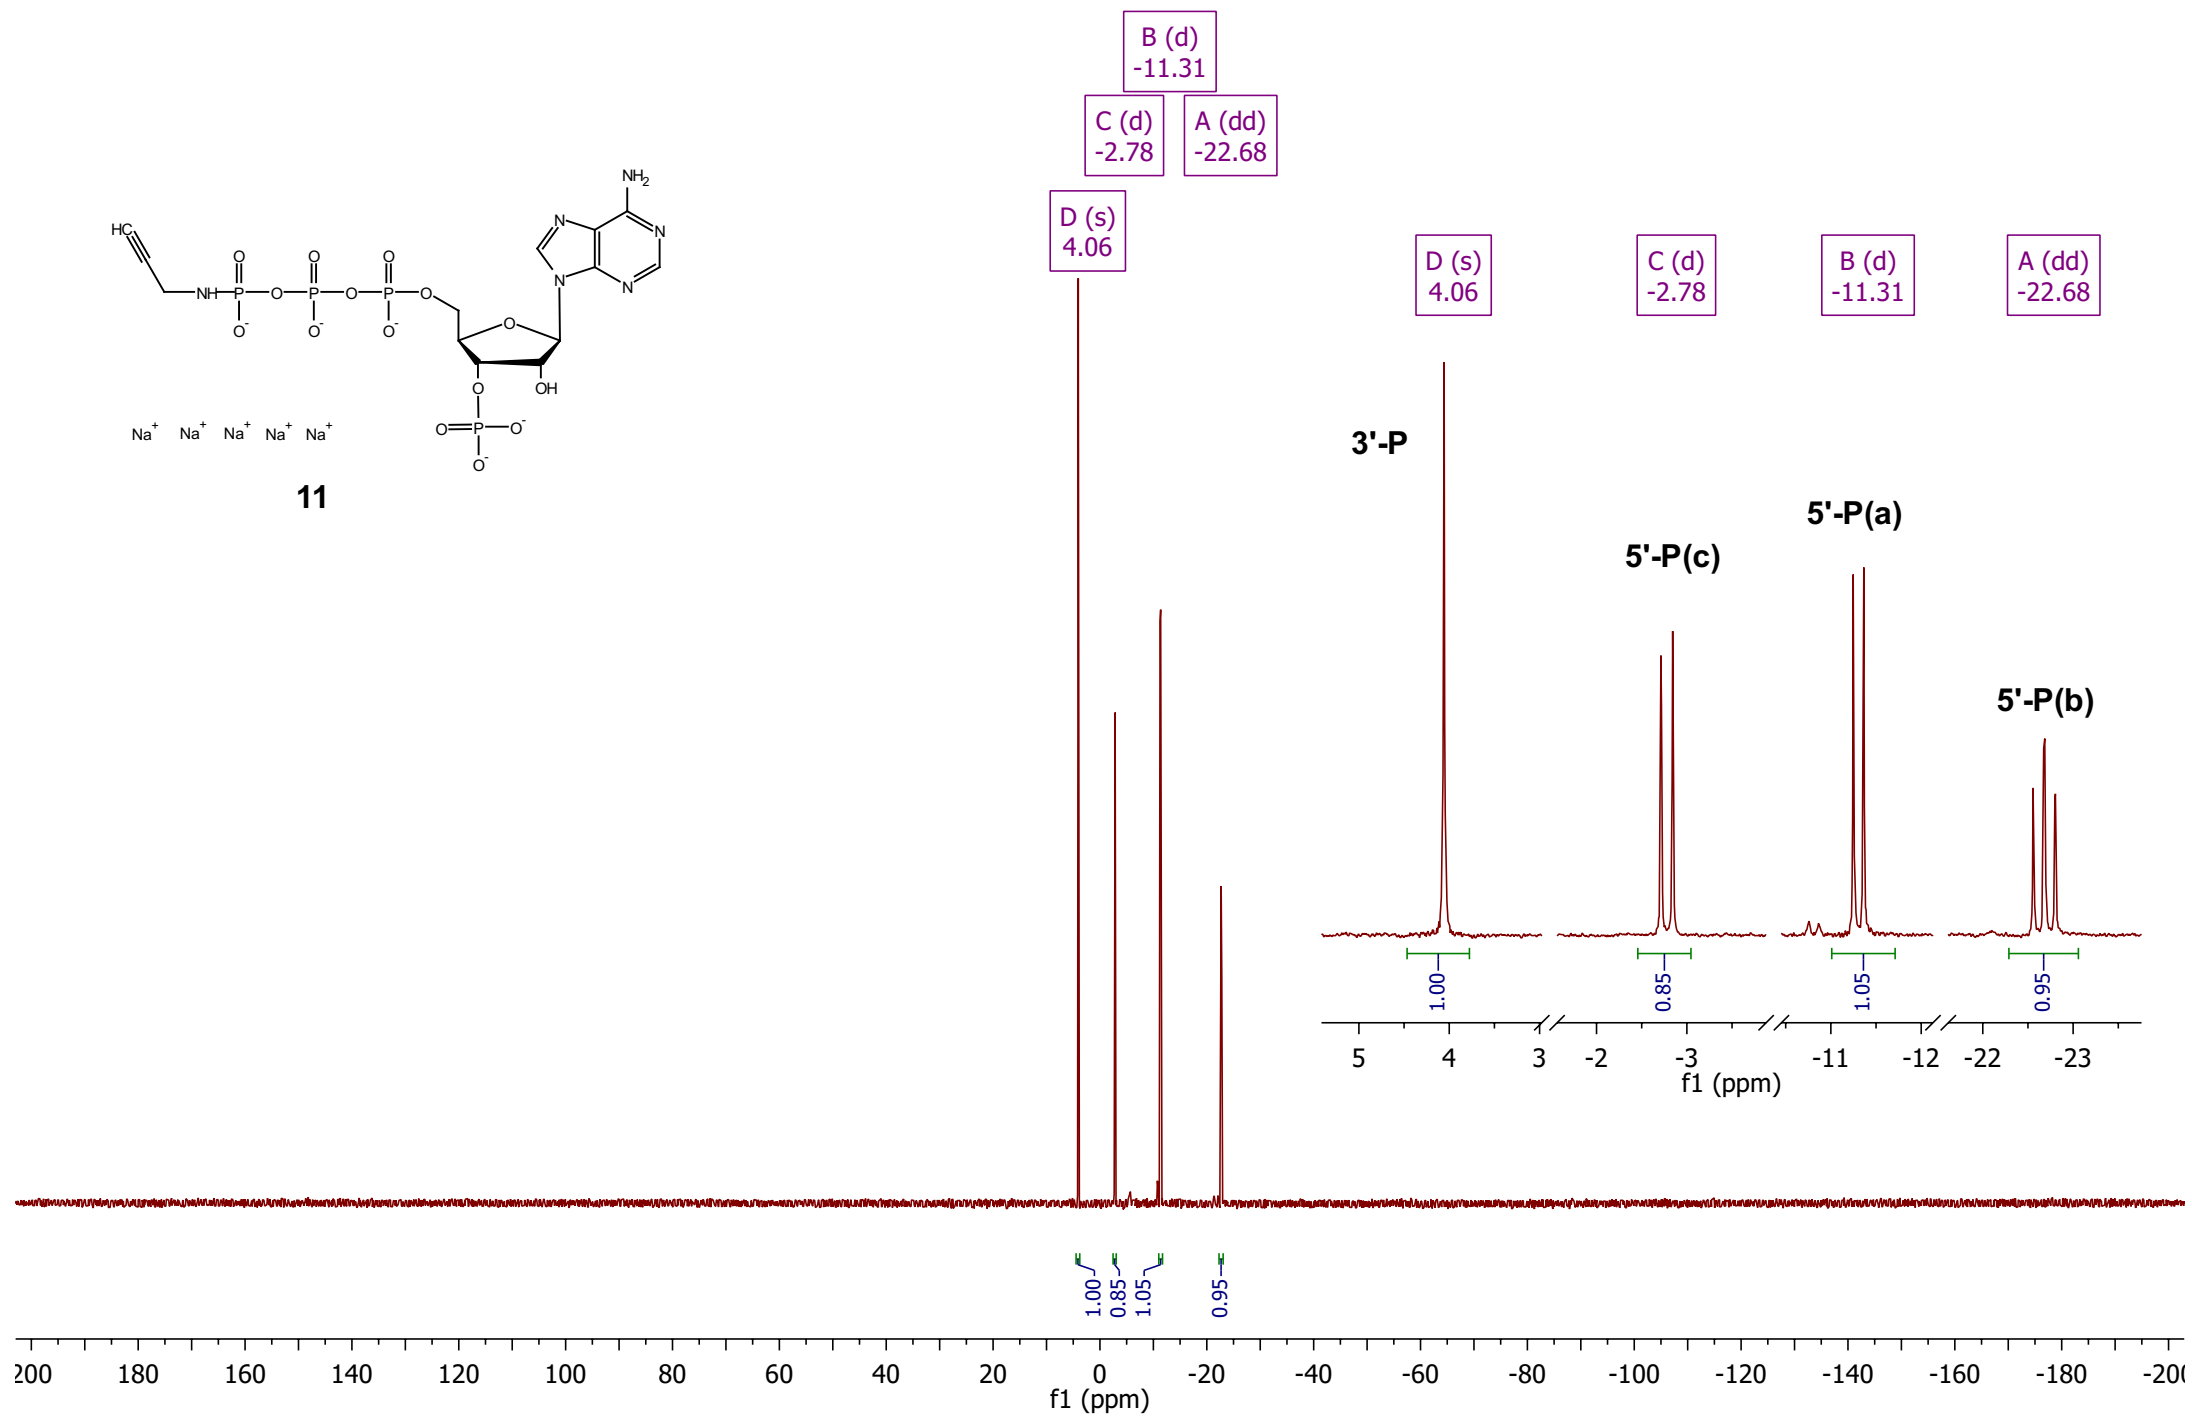

Compound 11 (propargylamido-pppAp),  $^{31}\text{P}$  - NMR (non-decoupled,  $\text{D}_2\text{O}$ , 162 MHz)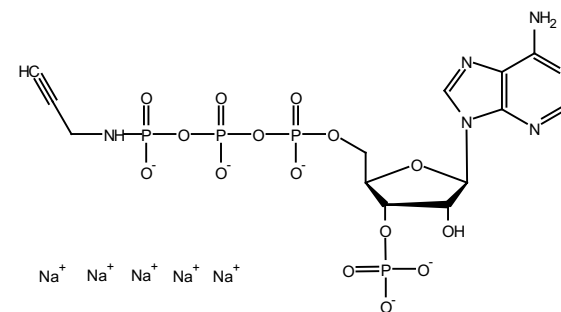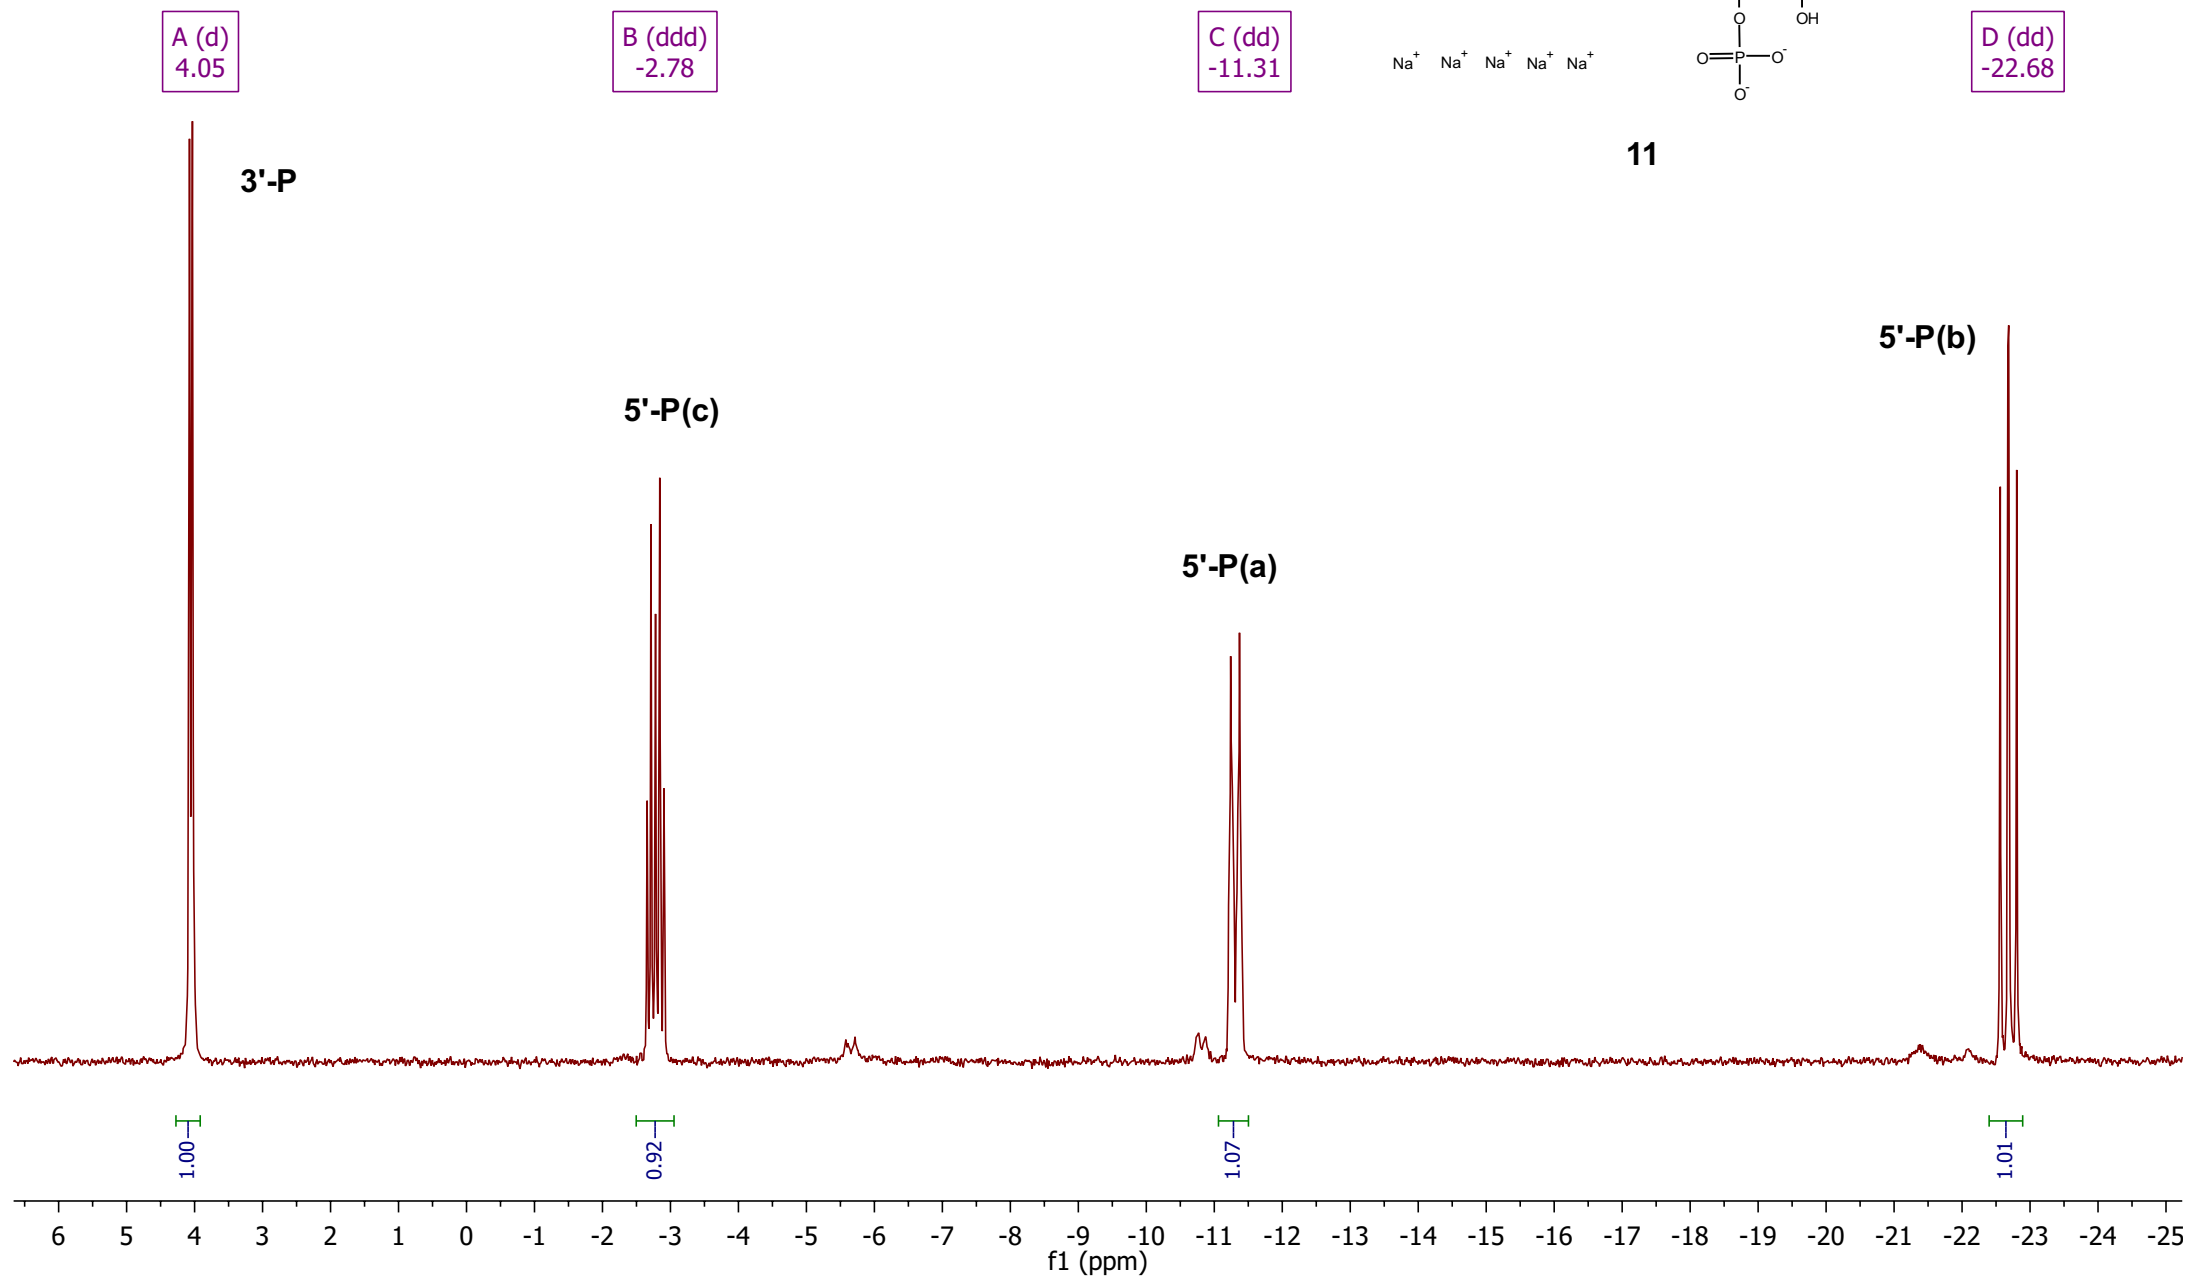



Compound 11 (propargylamido-pppAp), DQF-COSY (D<sub>2</sub>O)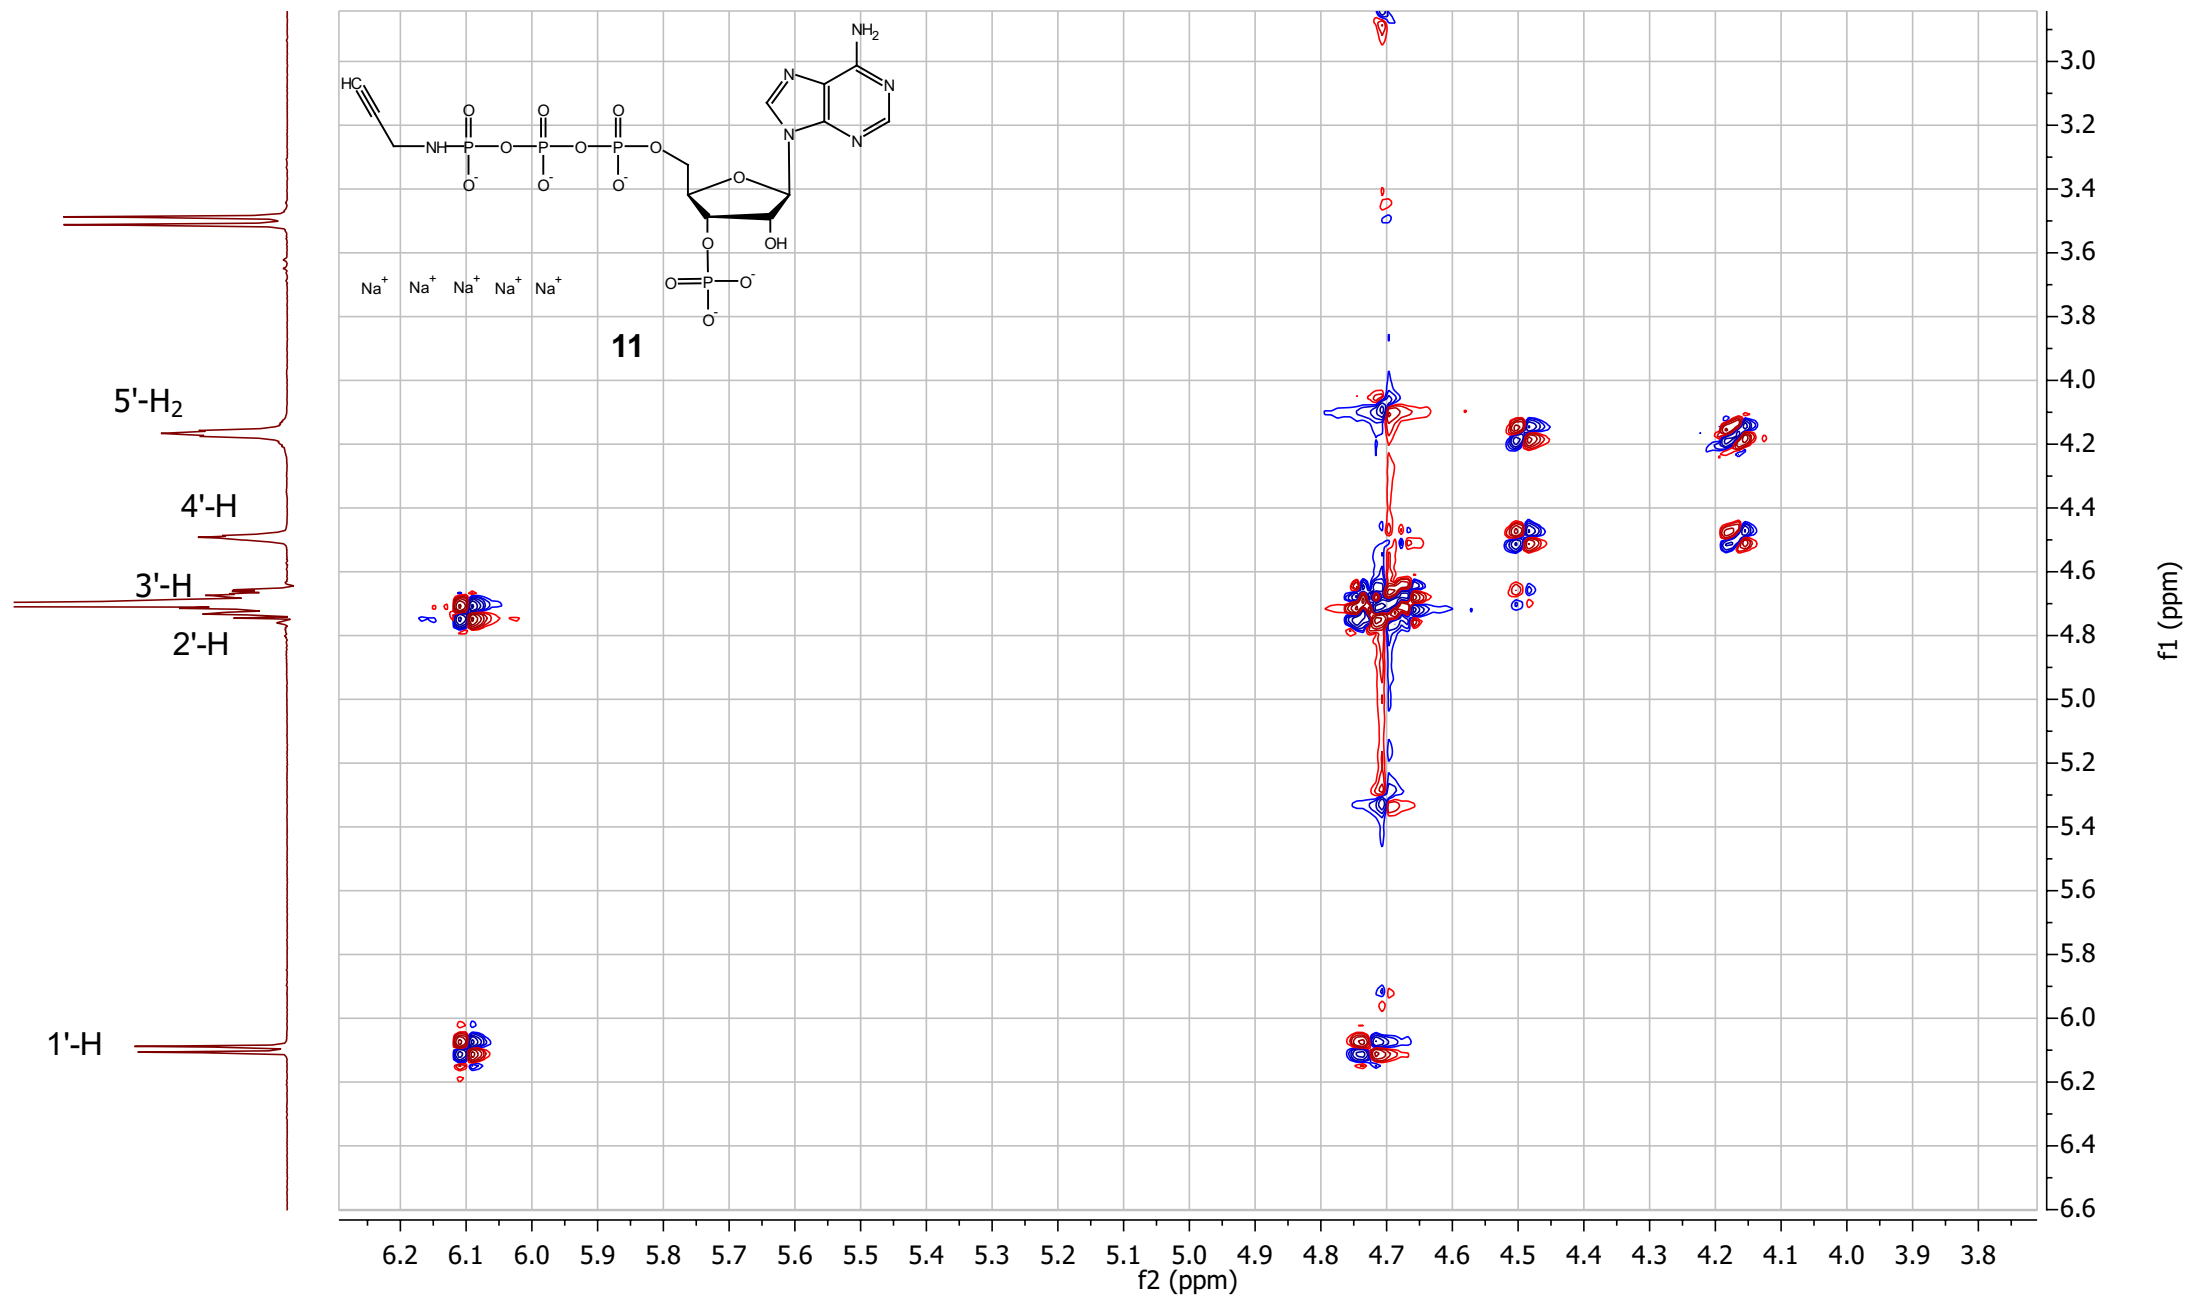

Compound 11 (propargylamido-pppAp), HSQC (D<sub>2</sub>O)

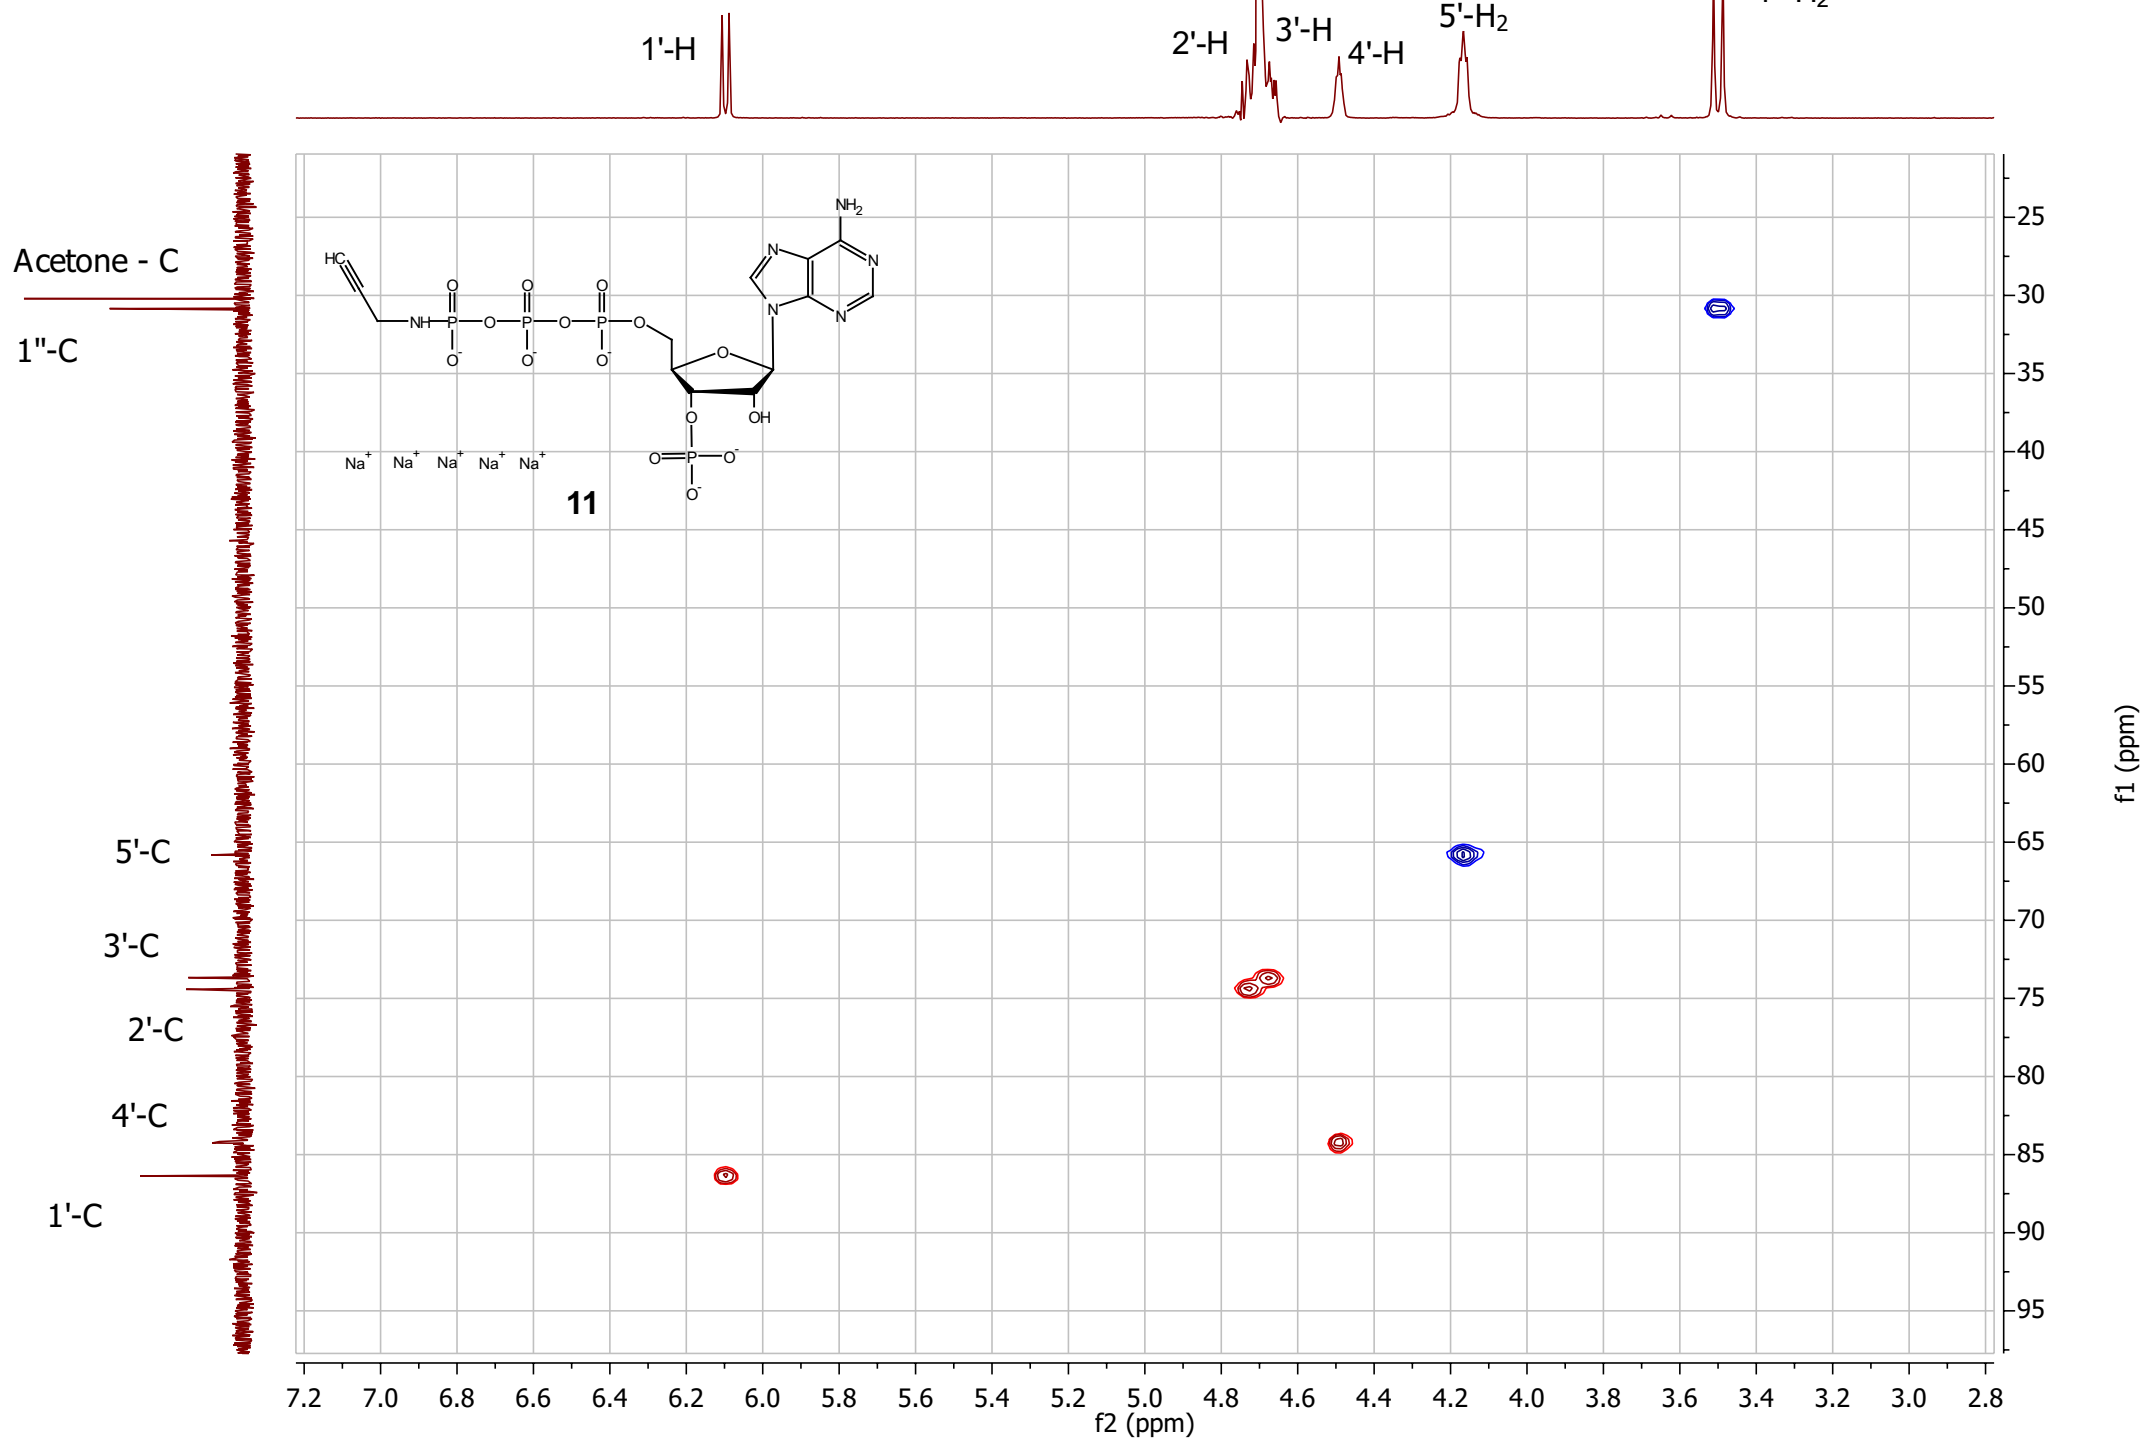

Compound 11 (propargylamido-pppAp), <sup>1</sup>H - <sup>13</sup>C - HMBC

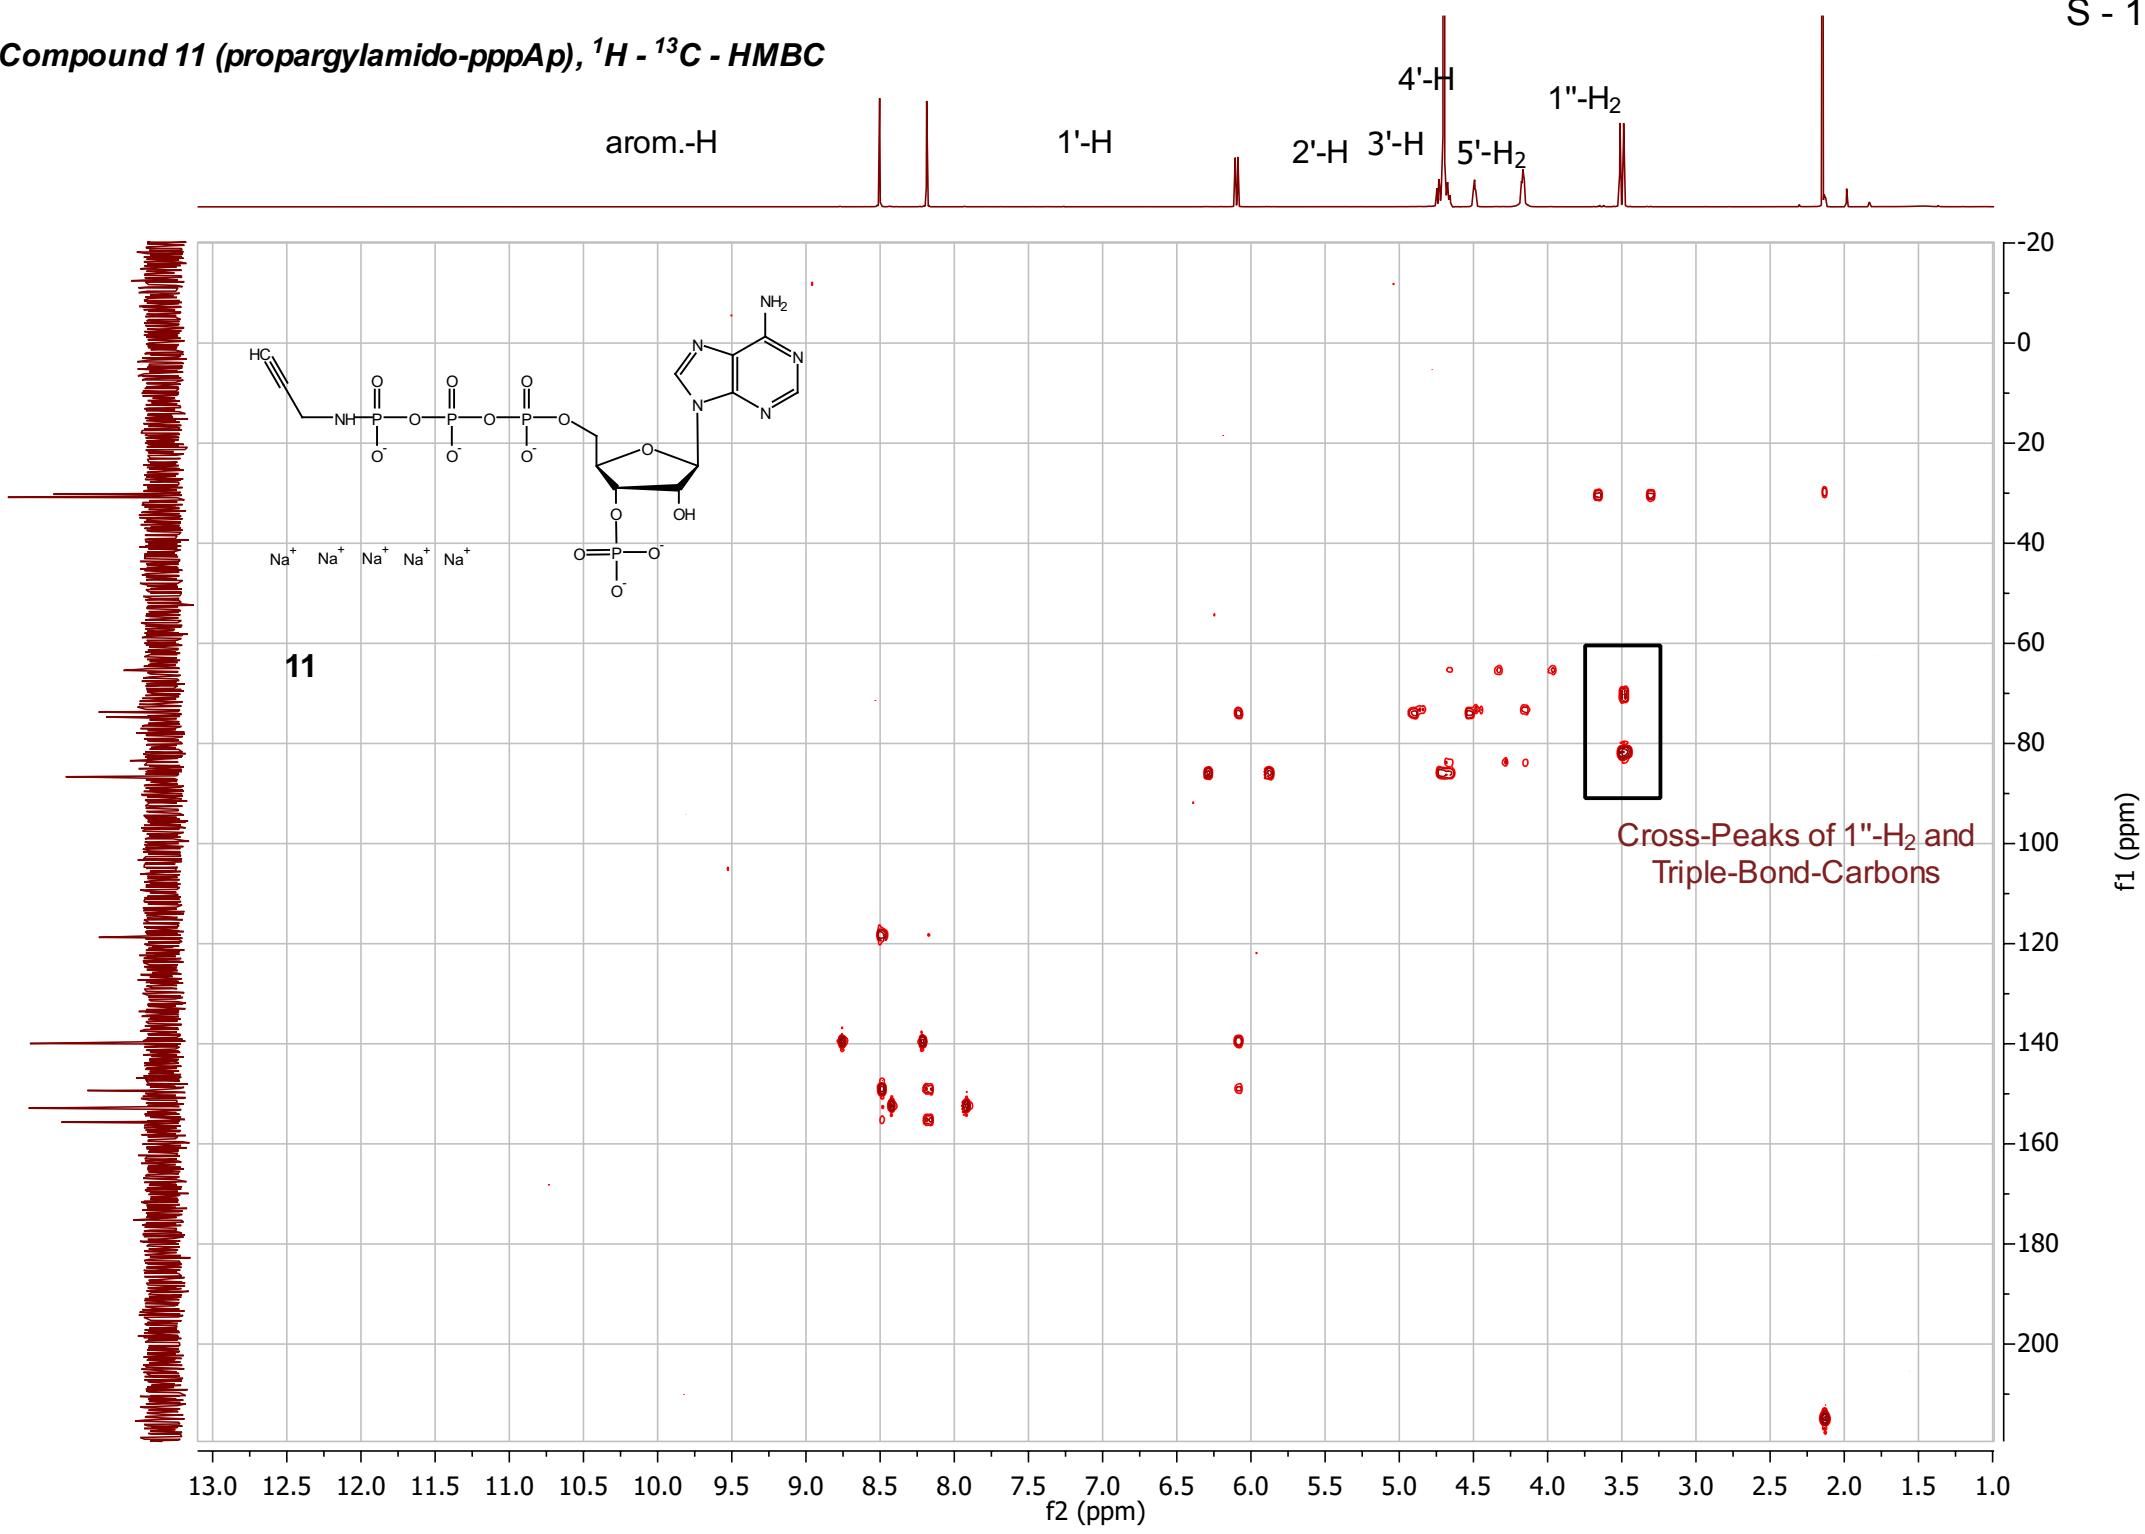

Compound 11 (propargylamido-pppAp), <sup>1</sup>H - <sup>31</sup>P - HMBC - (D<sub>2</sub>O)

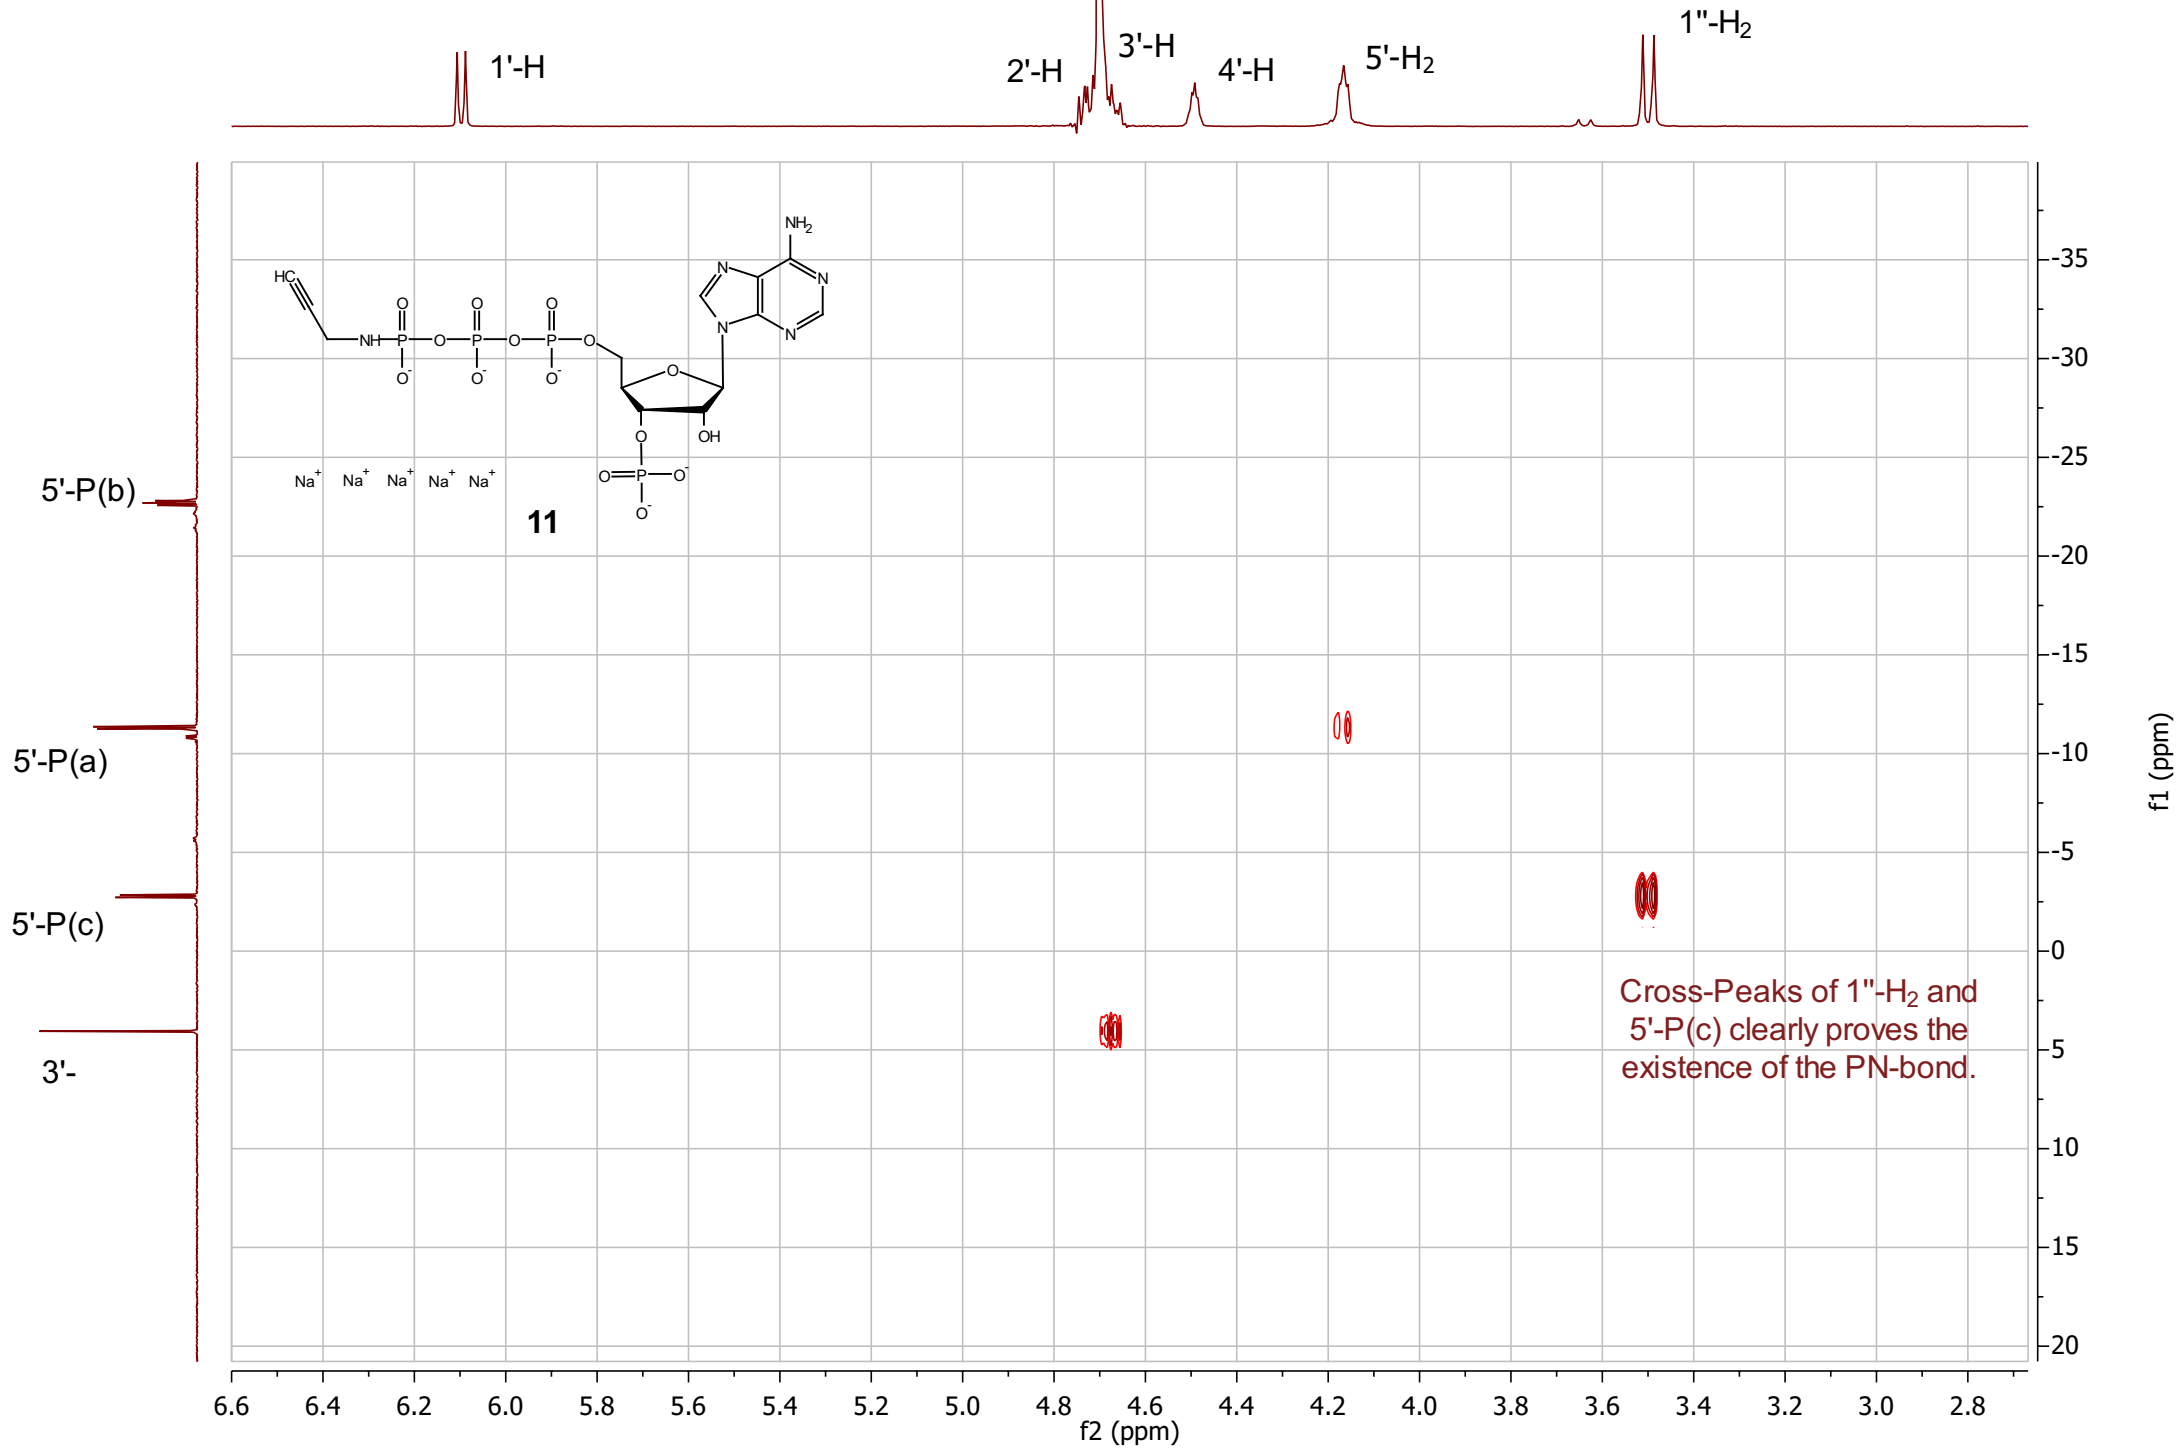

Compound 11 (propargylamido-pppAp), <sup>31</sup>P - <sup>31</sup>P- COSY (D<sub>2</sub>O)

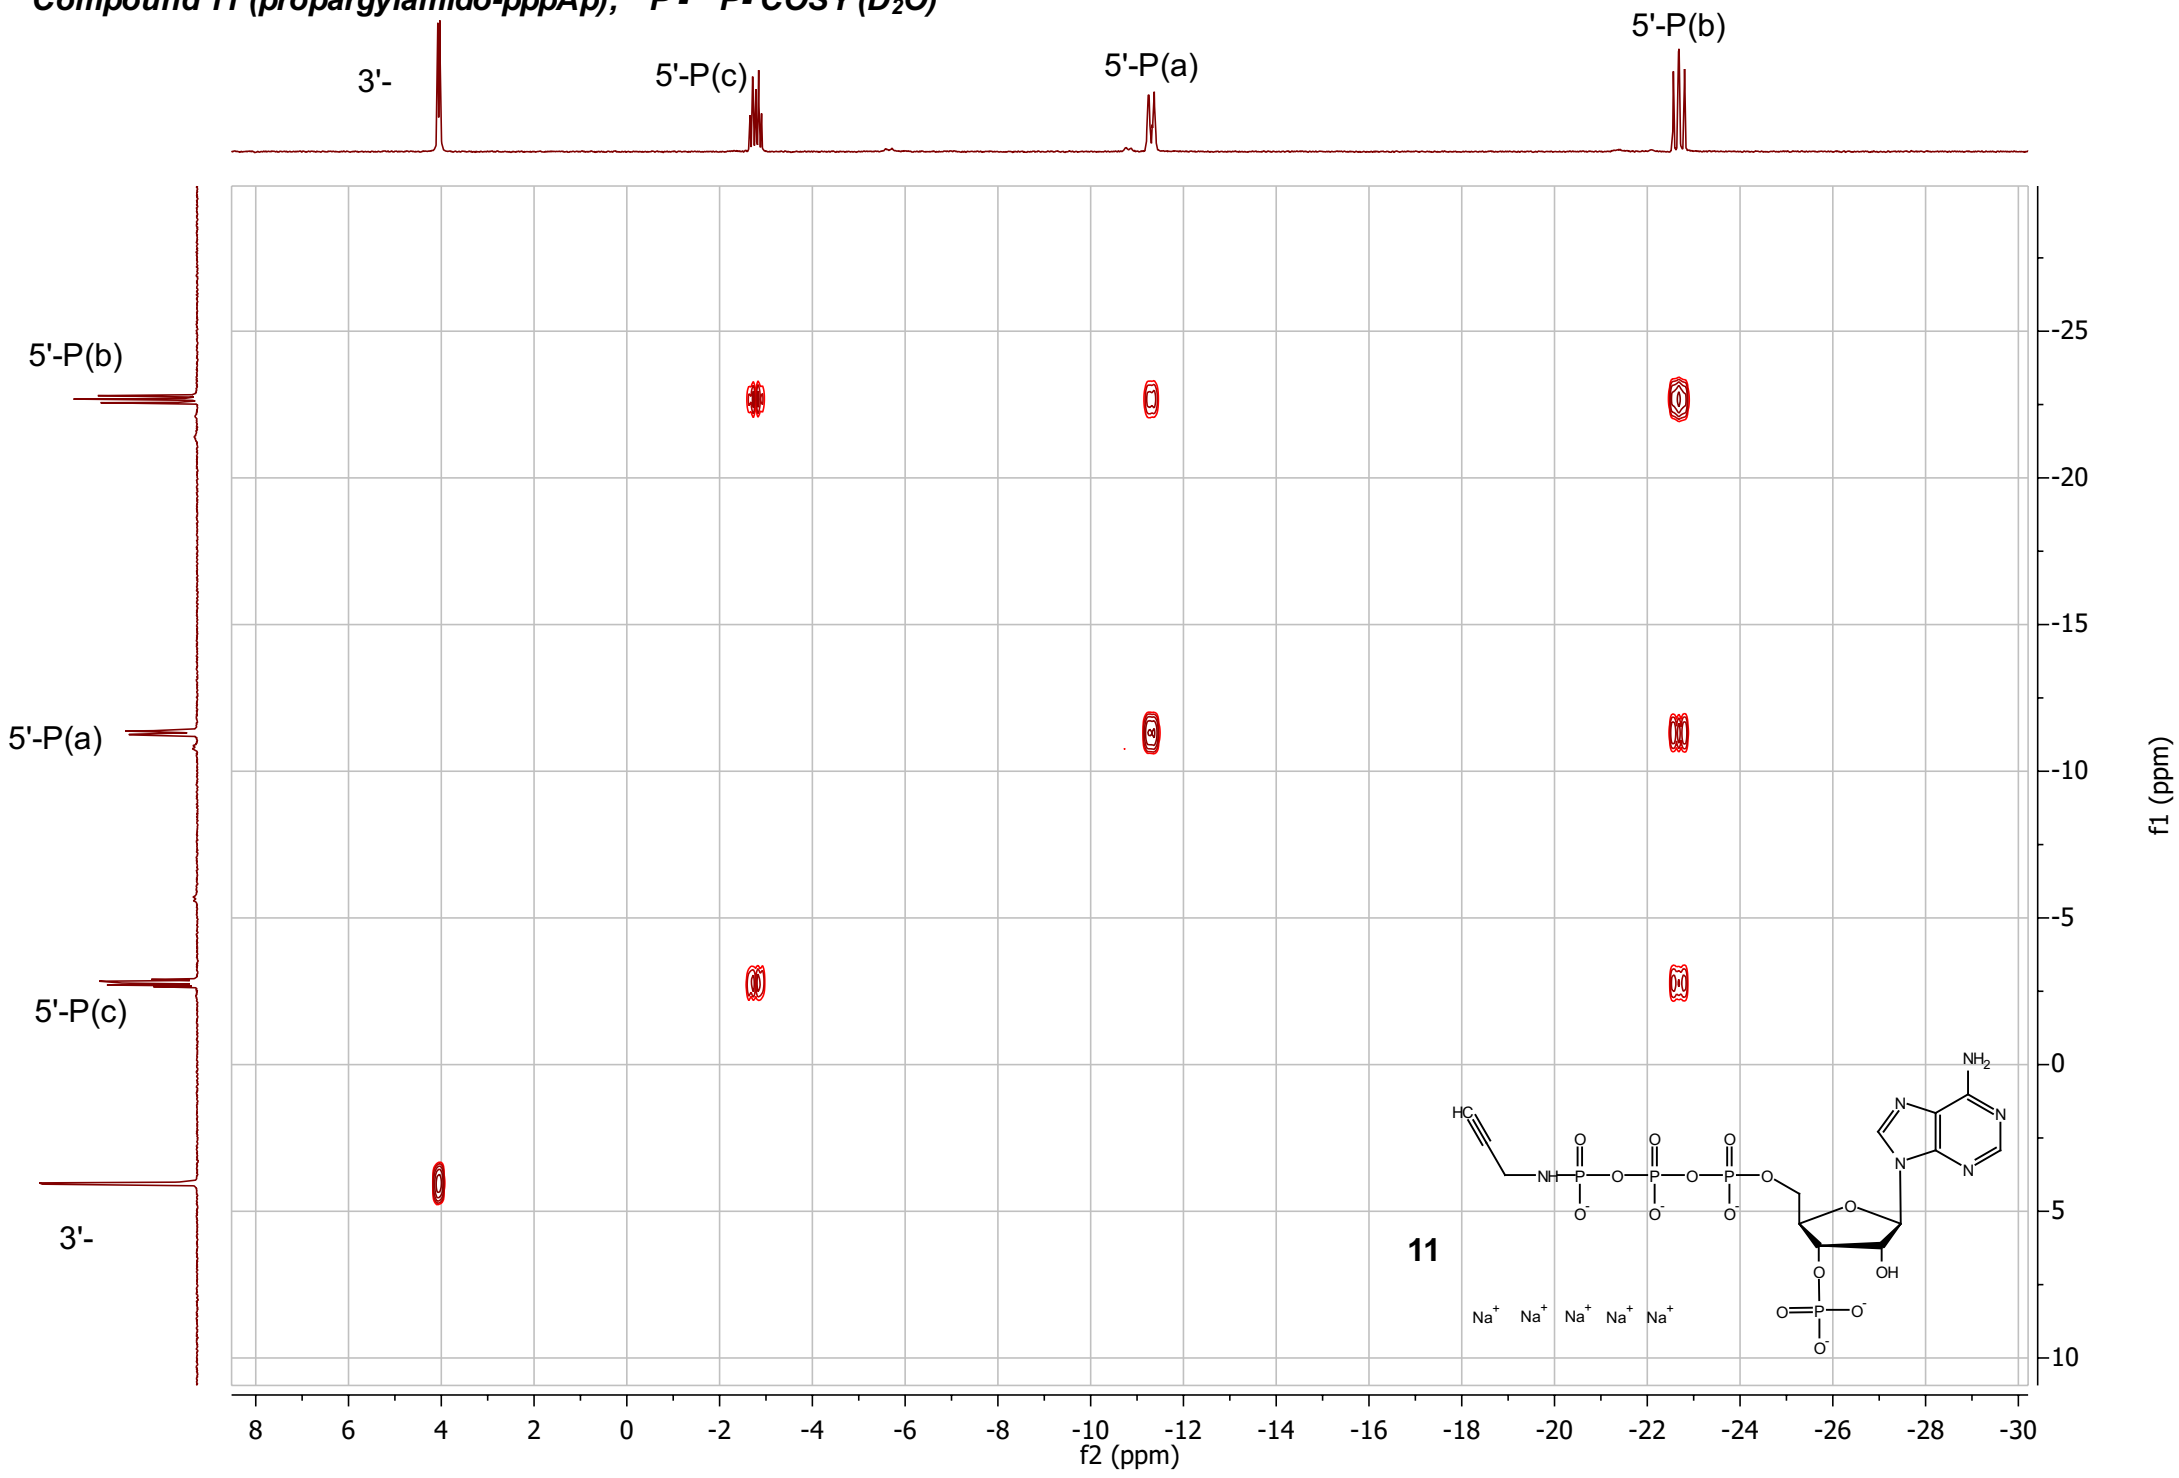

Compound 11 (propargylamido-pppAp),  $^{13}\text{C}$  [ $^1\text{H}$ ]-NMR ( $\text{D}_2\text{O}$ , 400 MHz)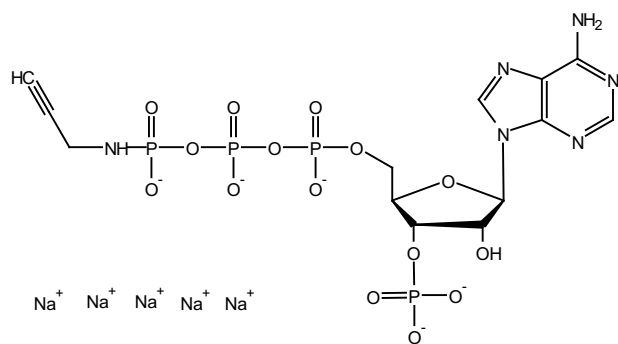

11

|        |        |        |        |       |       |
|--------|--------|--------|--------|-------|-------|
| C (s)  | 152.89 | F (s)  | 118.72 | J (d) | 73.70 |
| B (dd) | 155.72 | E (s)  | 139.99 | I (d) | 74.41 |
| D (s)  | 149.51 | A (dd) | 84.18  | K (s) | 65.83 |
| G (s)  | 86.38  | L (s)  | 30.85  |       |       |

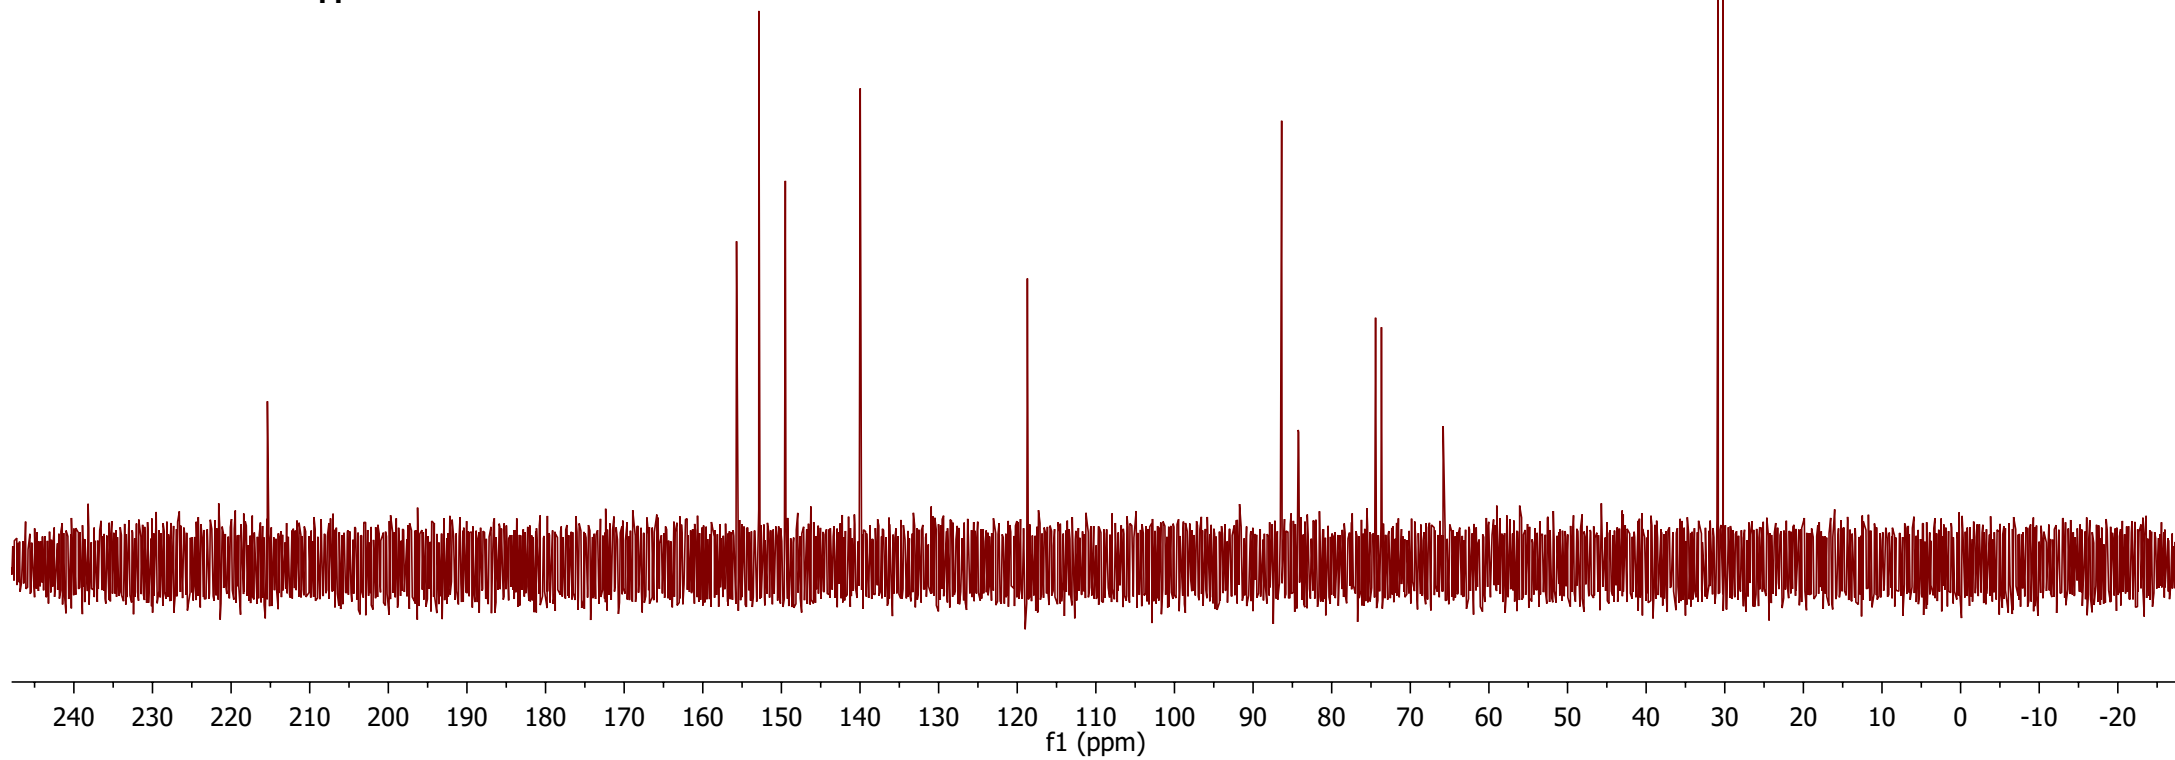

**Compound 12 (propargylamido-pppGp),  $^1\text{H}$  - NMR ( $\text{D}_2\text{O}$ , 400 MHz)**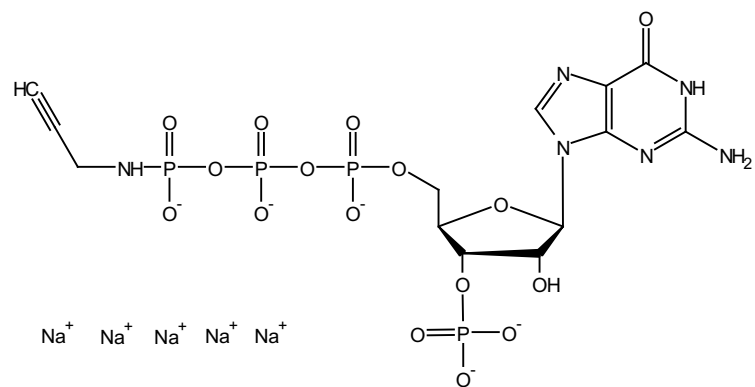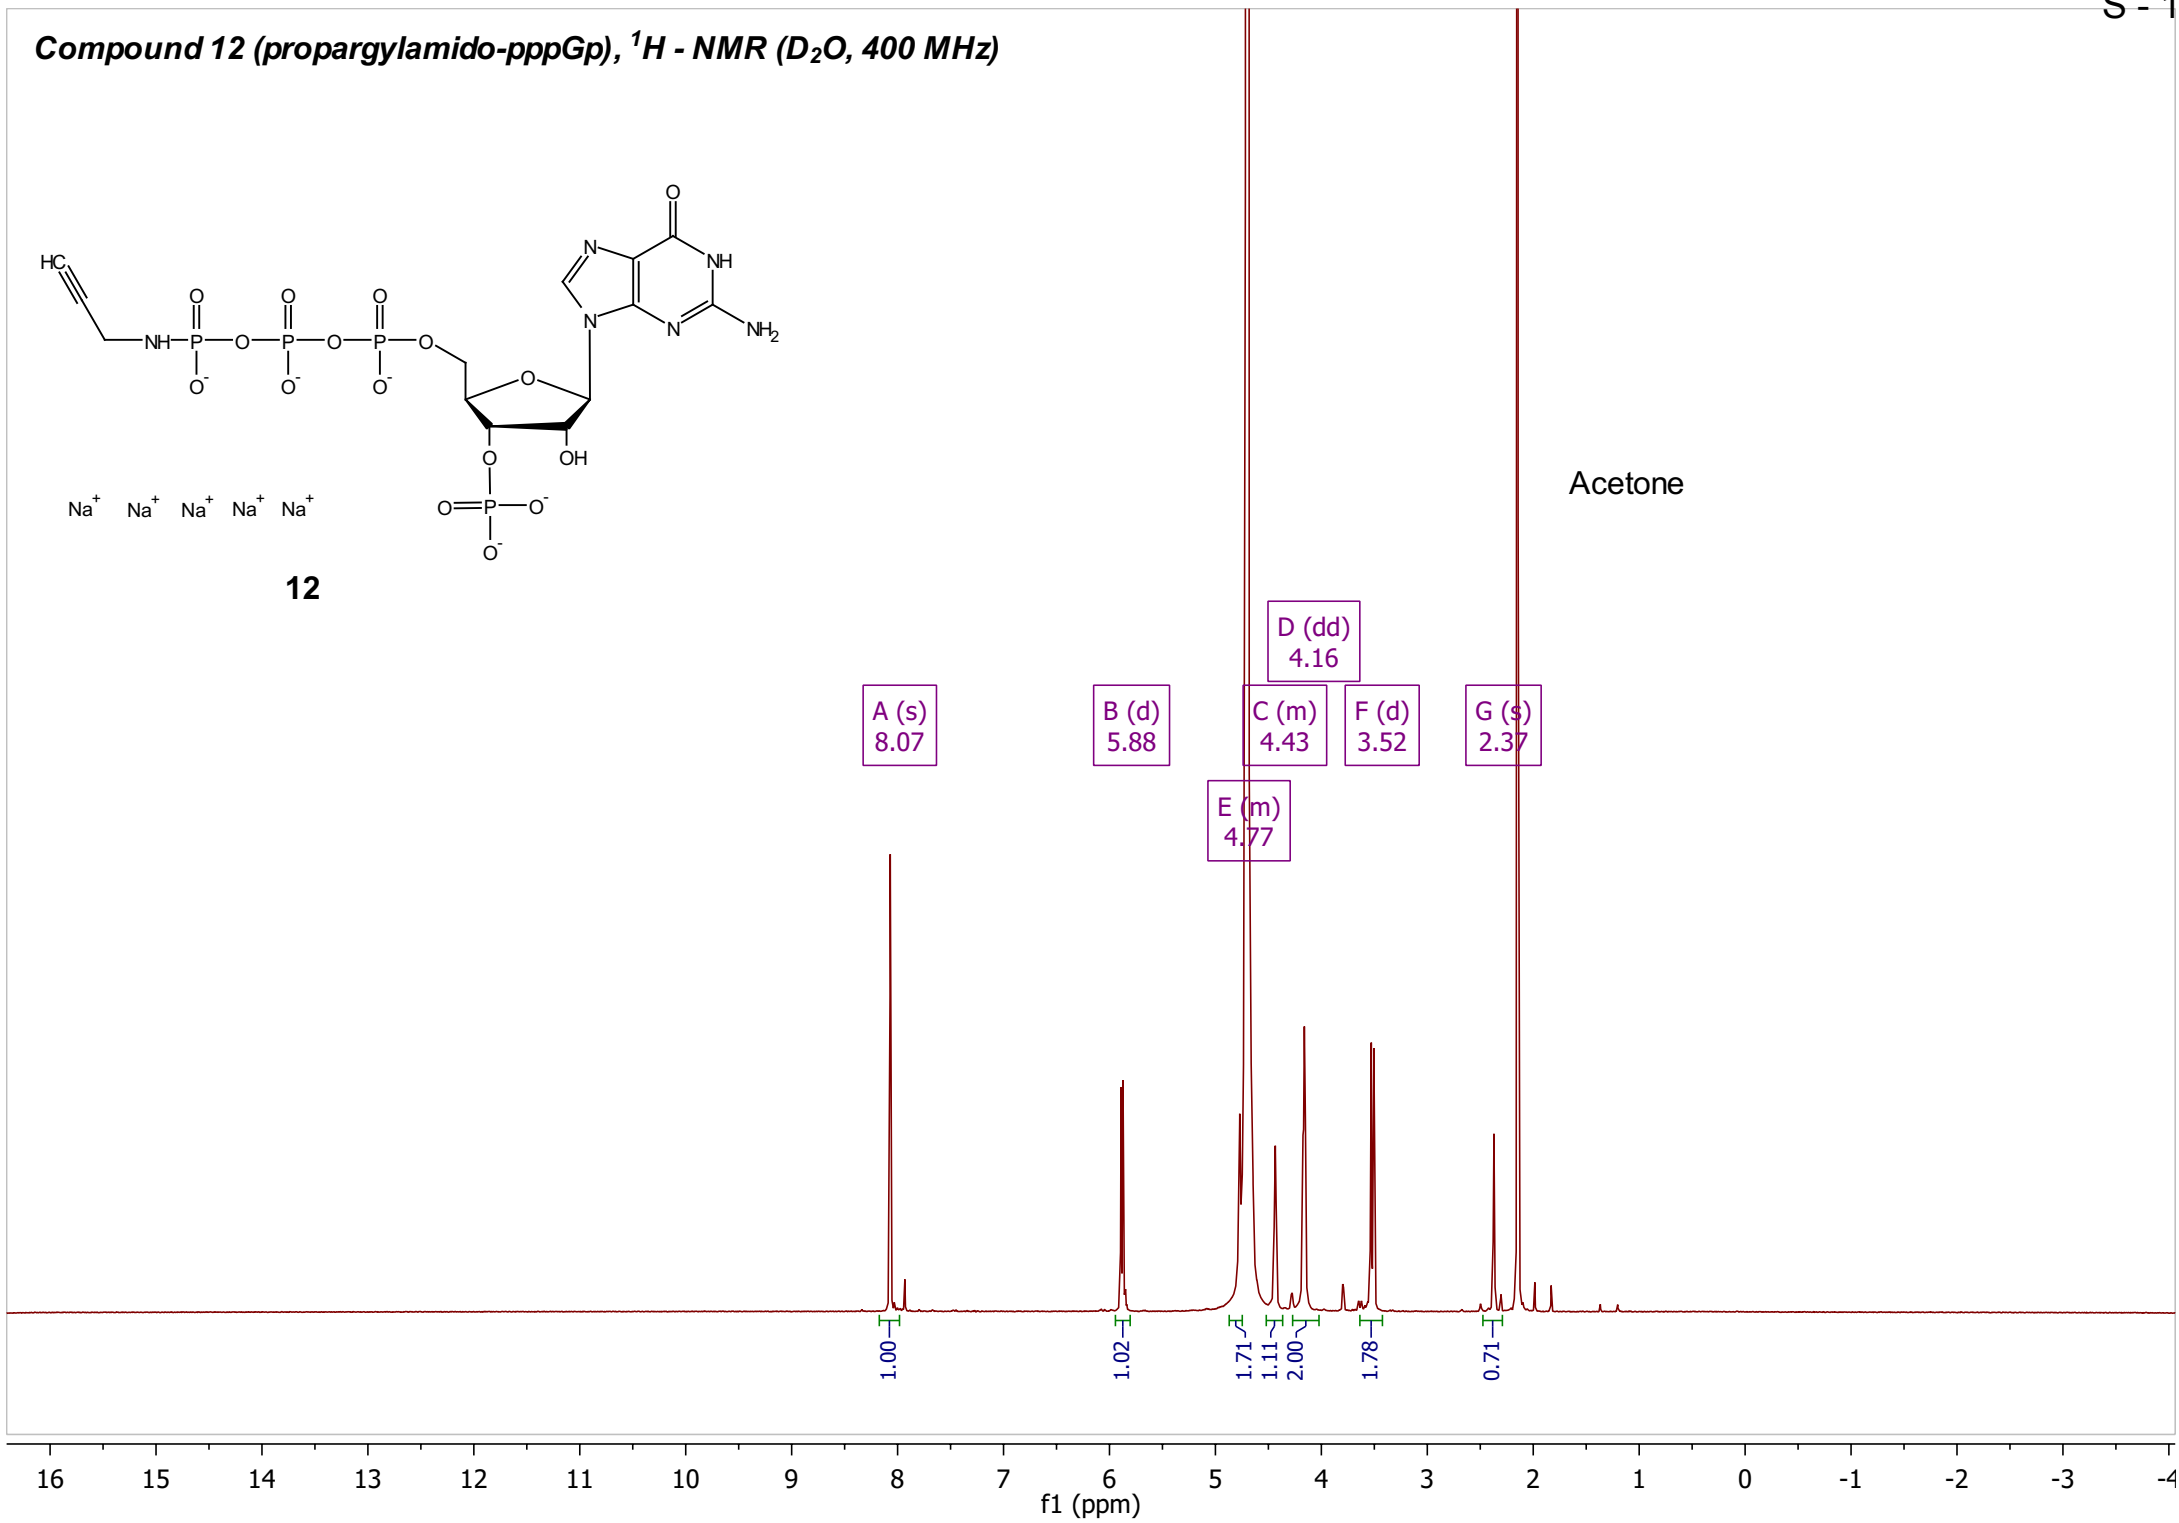

Compound 12 (propargylamido-pppGp),  $^{31}\text{P}\{^1\text{H}\}$  - NMR ( $\text{D}_2\text{O}$ , 162 MHz)

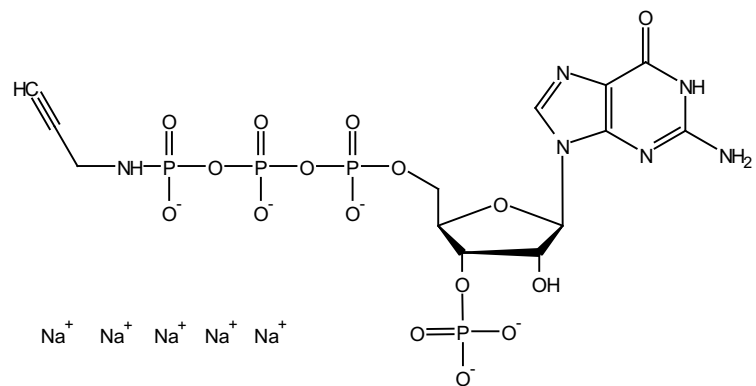

12

A (s)  
4.03

B (d)  
-2.73

D (m)  
-22.64

C (d)  
-11.28

A (s)  
4.03

B (d)  
-2.73

C (d)  
-11.28

D (m)  
-22.64

3'-P

5'-P(a)

5'-P(c)

5'-P(b)

1.00

0.87

1.00

0.96

5 4 3 -2 -3 -4 -10 -11 -12 -13 -22 -23 -24  
f1 (ppm)

1.00  
0.87  
1.00  
0.96

200 180 160 140 120 100 80 60 40 20 -20 -40 -60 -80 -100 -120 -140 -160 -180 -200  
f1 (ppm)



Compound 12 (propargylamido-pppGp), DQF-COSY (D<sub>2</sub>O)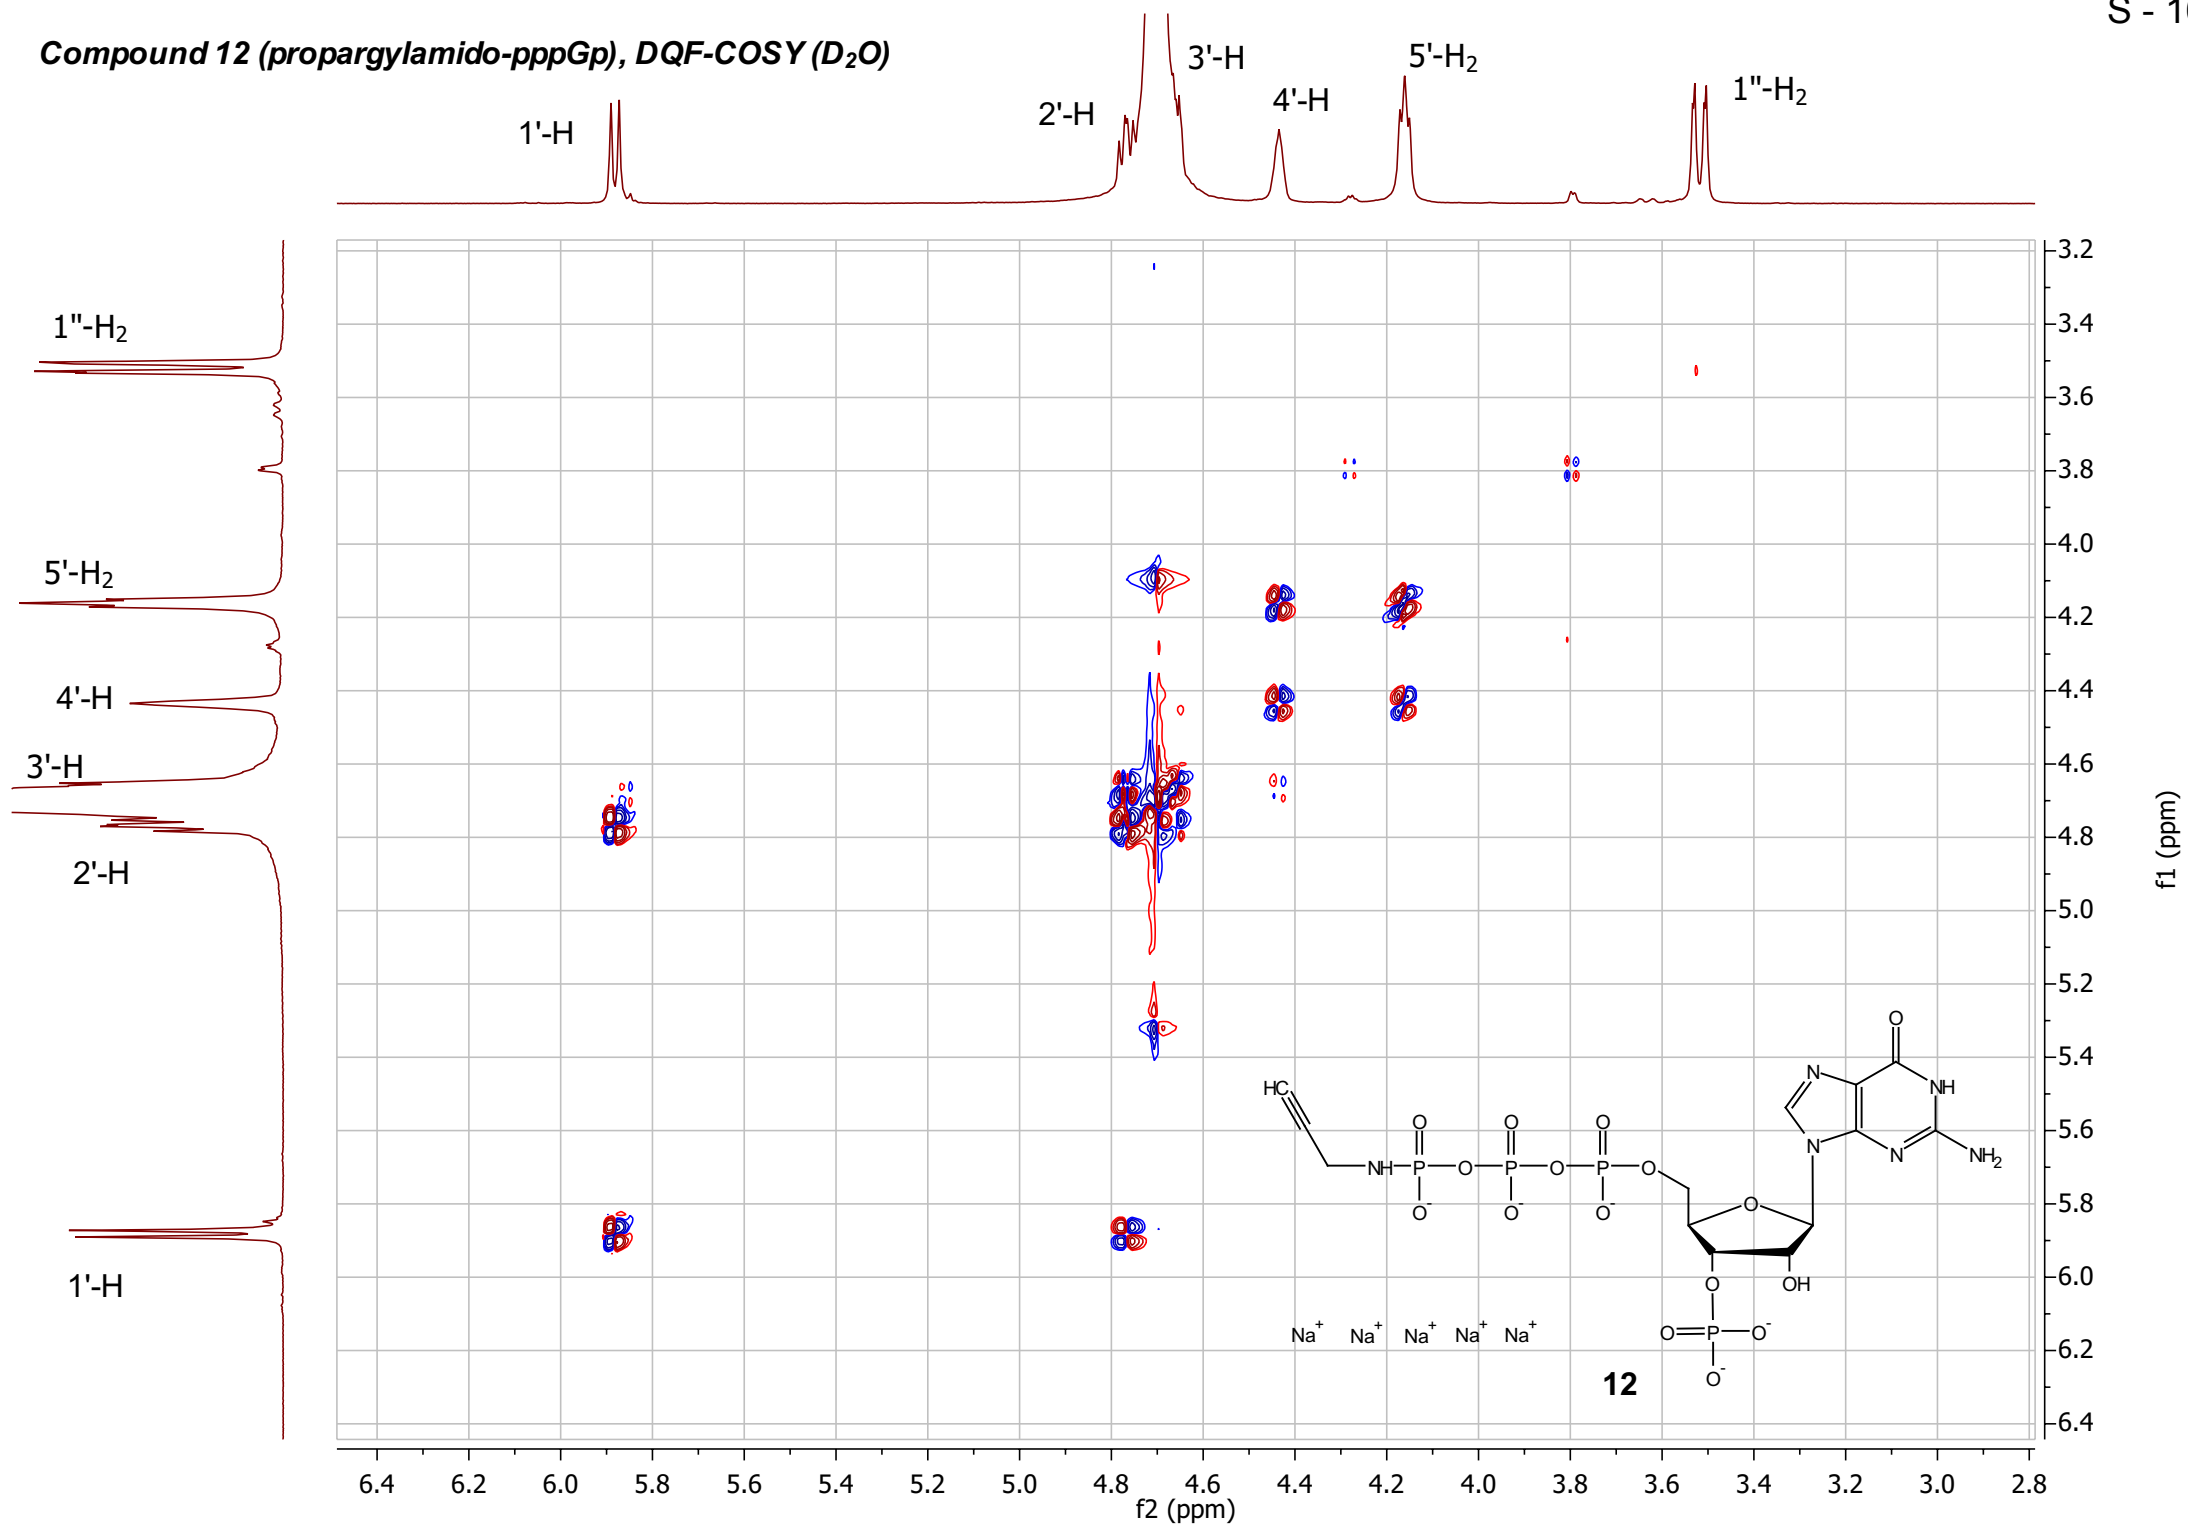

Compound 12 (propargylamido-pppGp), HSQC (D<sub>2</sub>O)

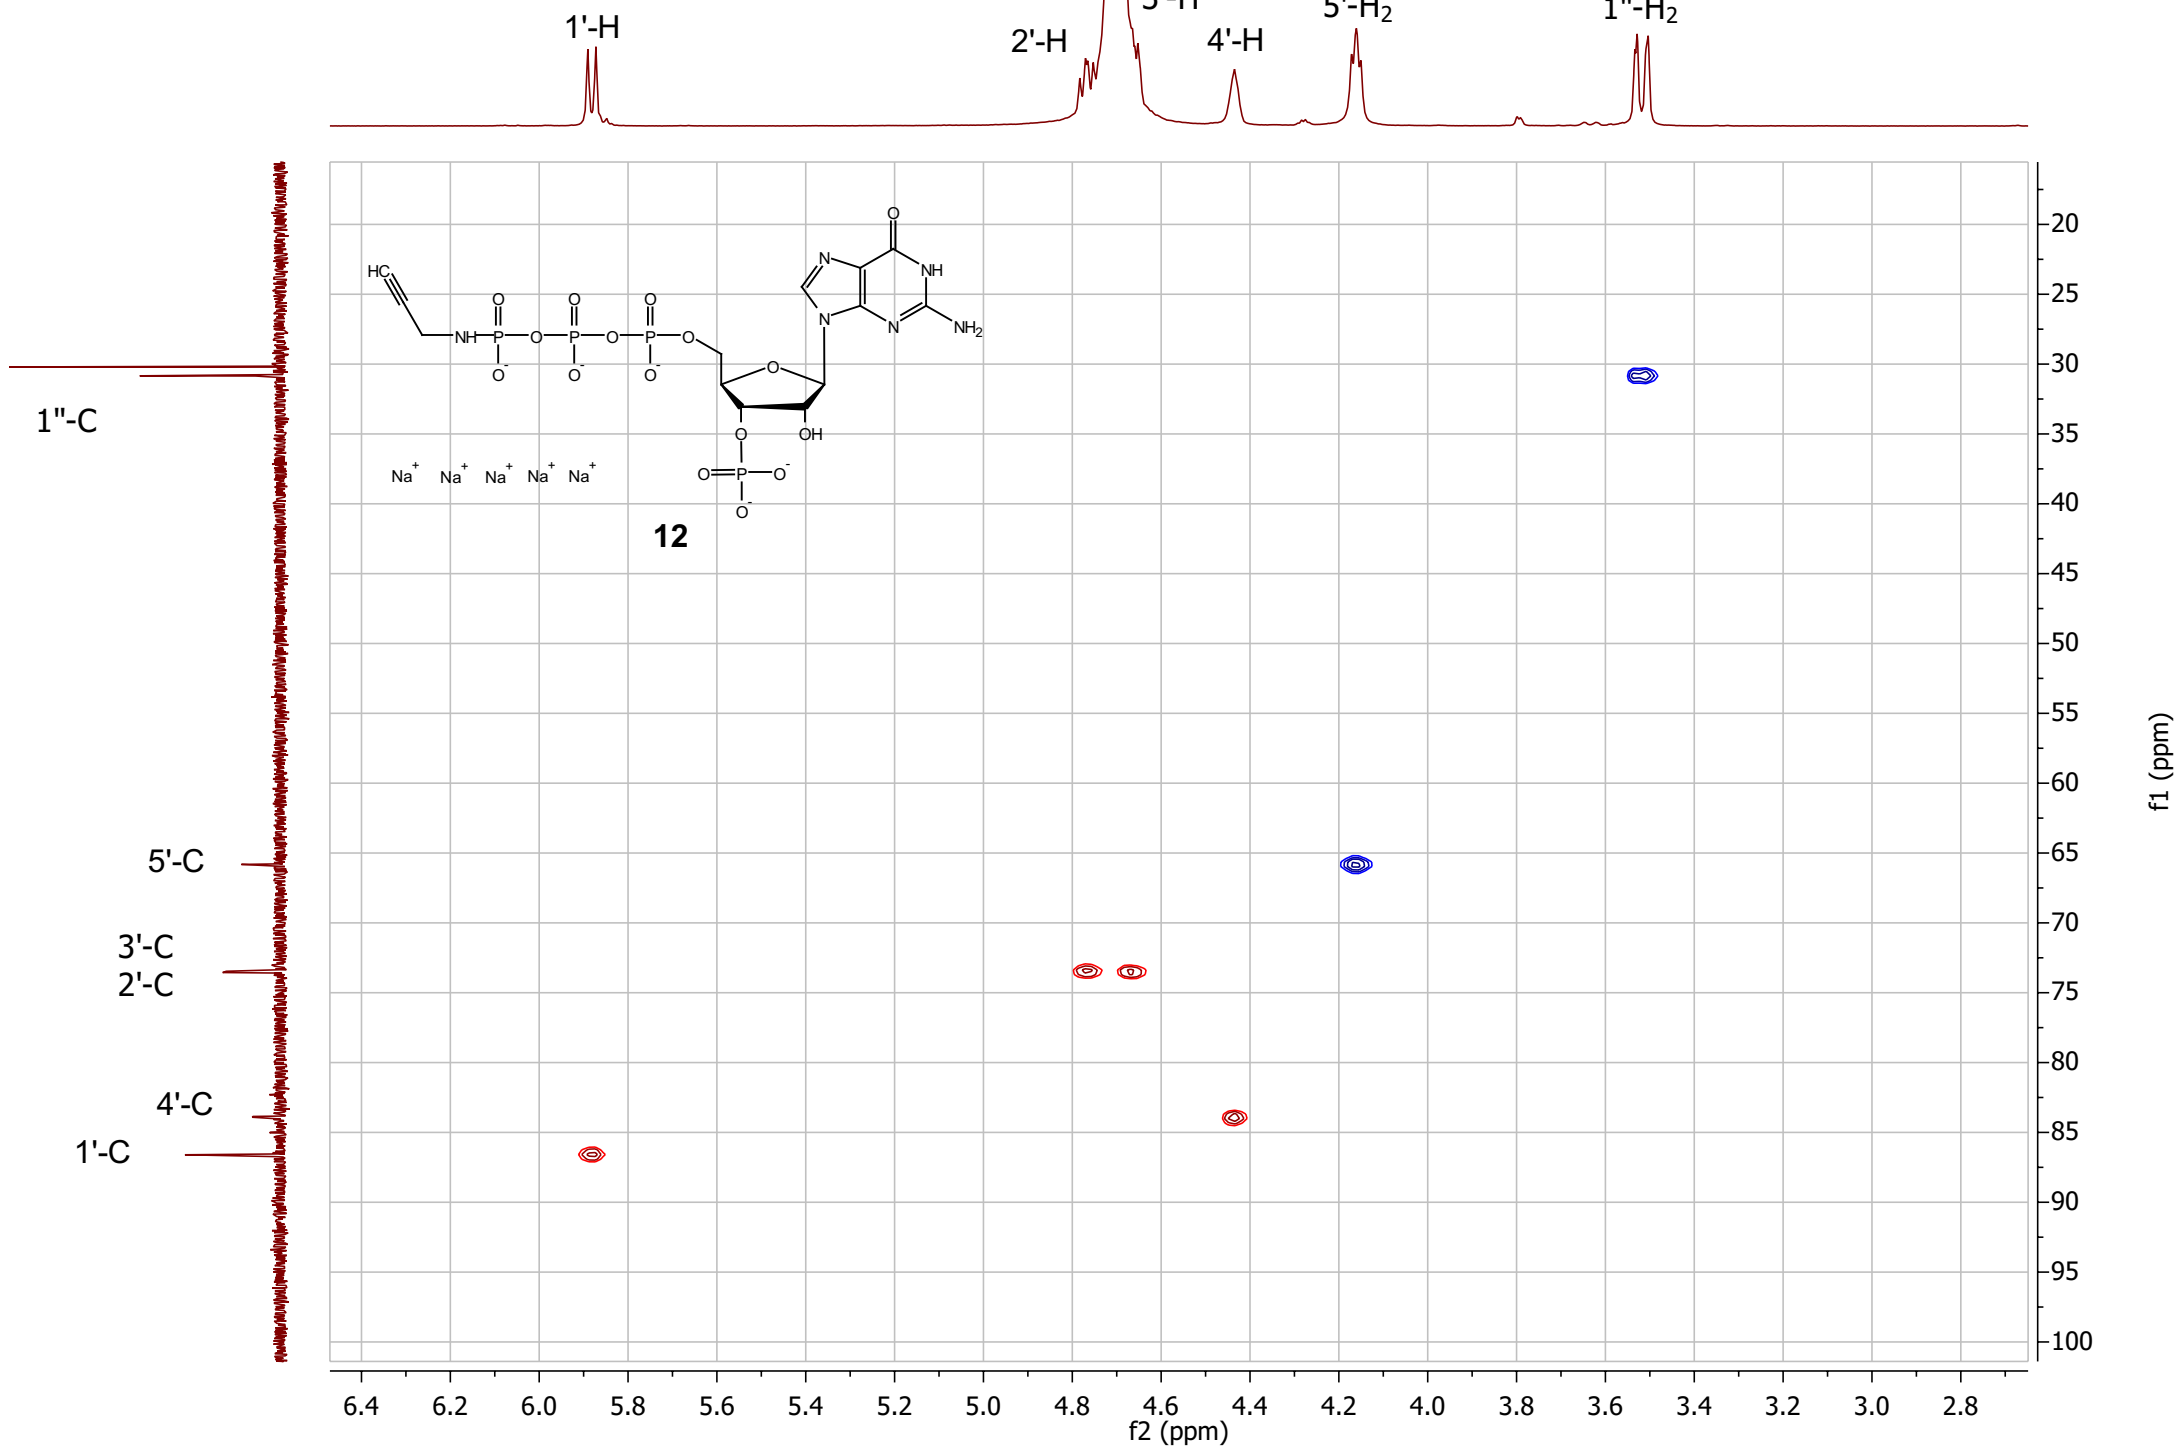

Compound 12 (propargylamido-pppGp), <sup>1</sup>H-<sup>31</sup>P-HMBC (D<sub>2</sub>O)

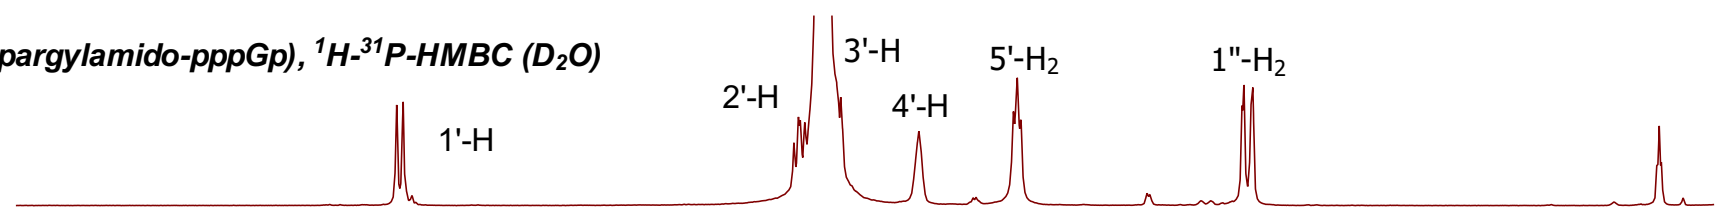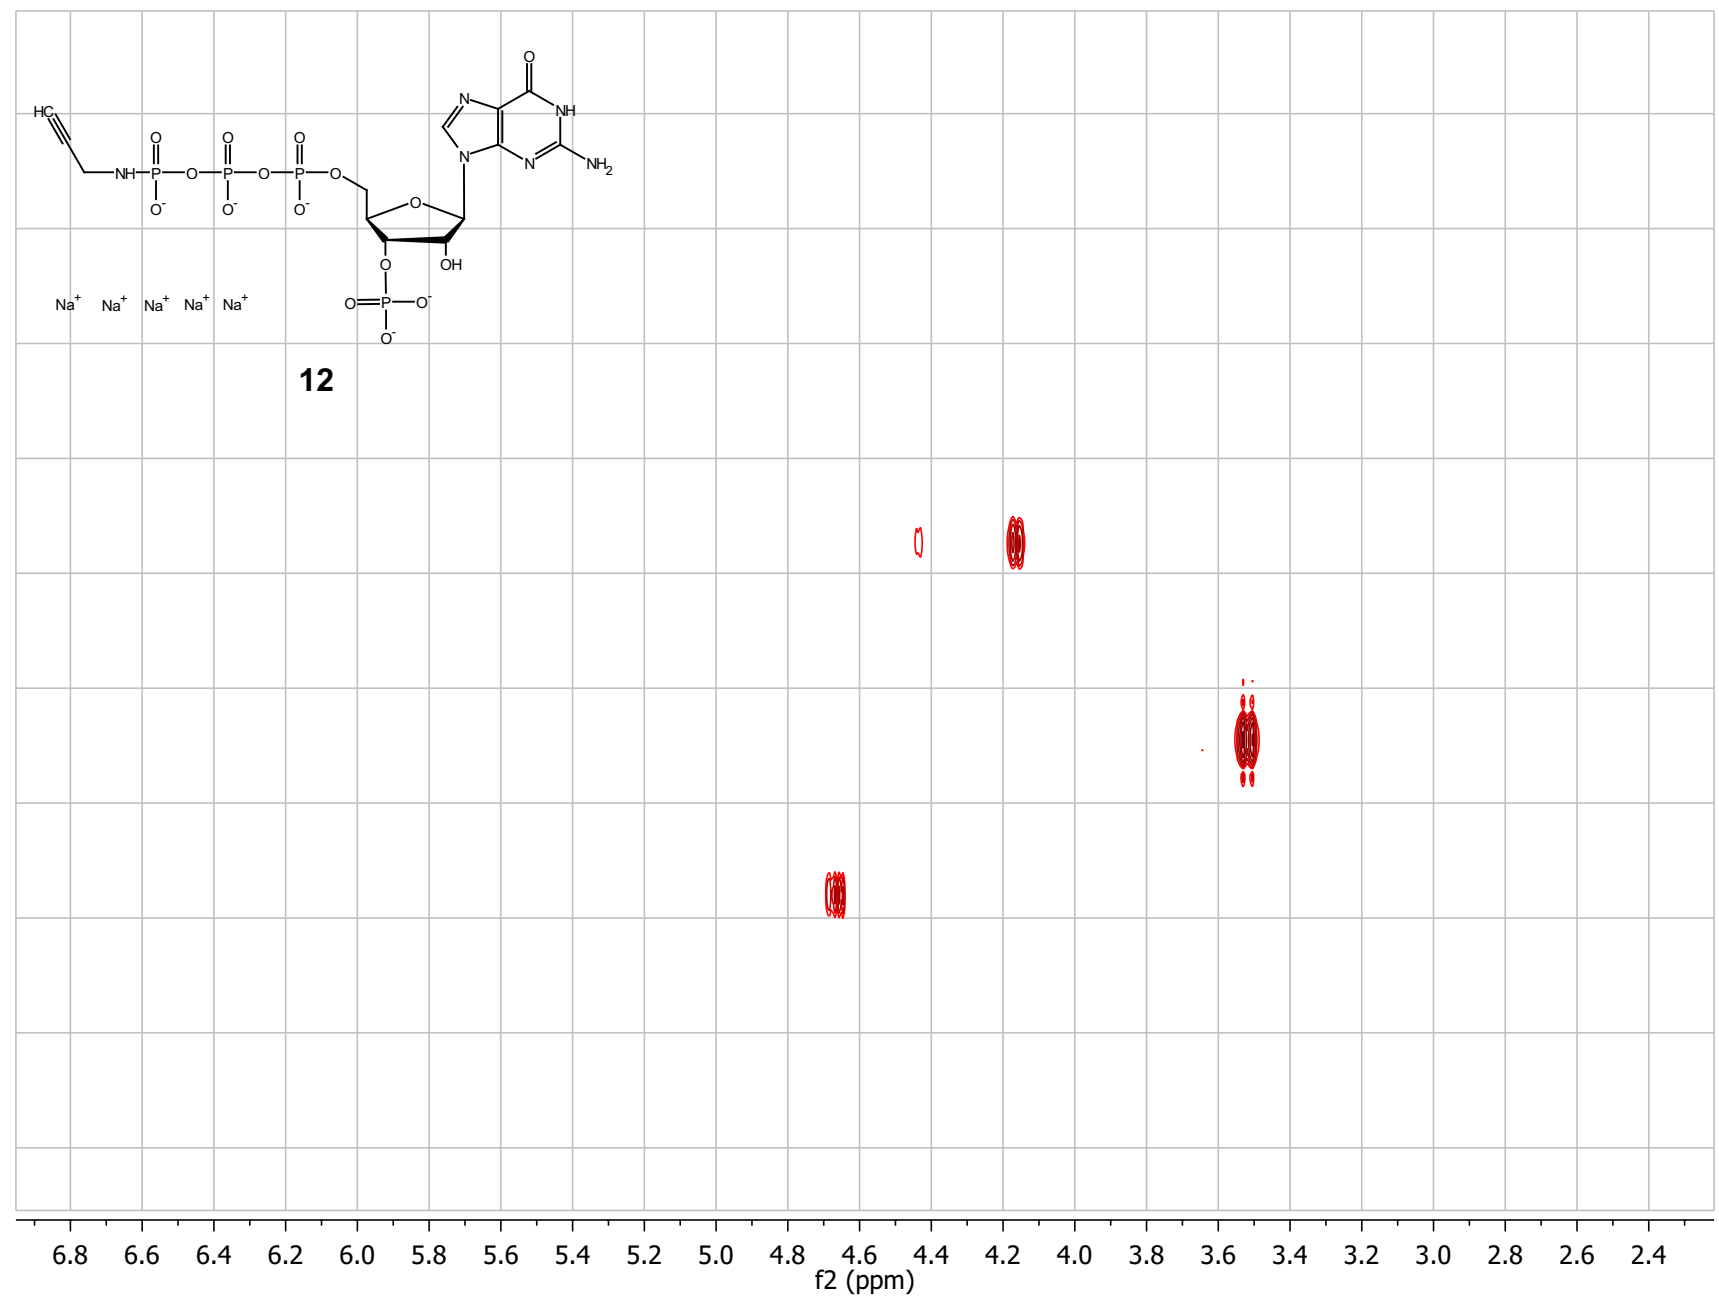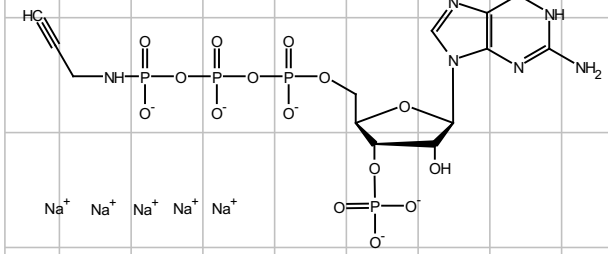

5'-P(b)

5'-P(a)

5'-P(c)

3'-P

f1 (ppm)

f2 (ppm)

**Compound 12 (propargylamido-pppGp),  $^{13}\text{C}\{^1\text{H}\}$  - NMR ( $\text{D}_2\text{O}$ , 101 MHz)**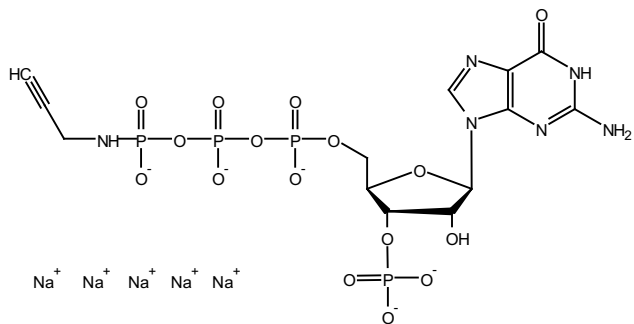Na<sup>+</sup> Na<sup>+</sup> Na<sup>+</sup> Na<sup>+</sup> Na<sup>+</sup>**12**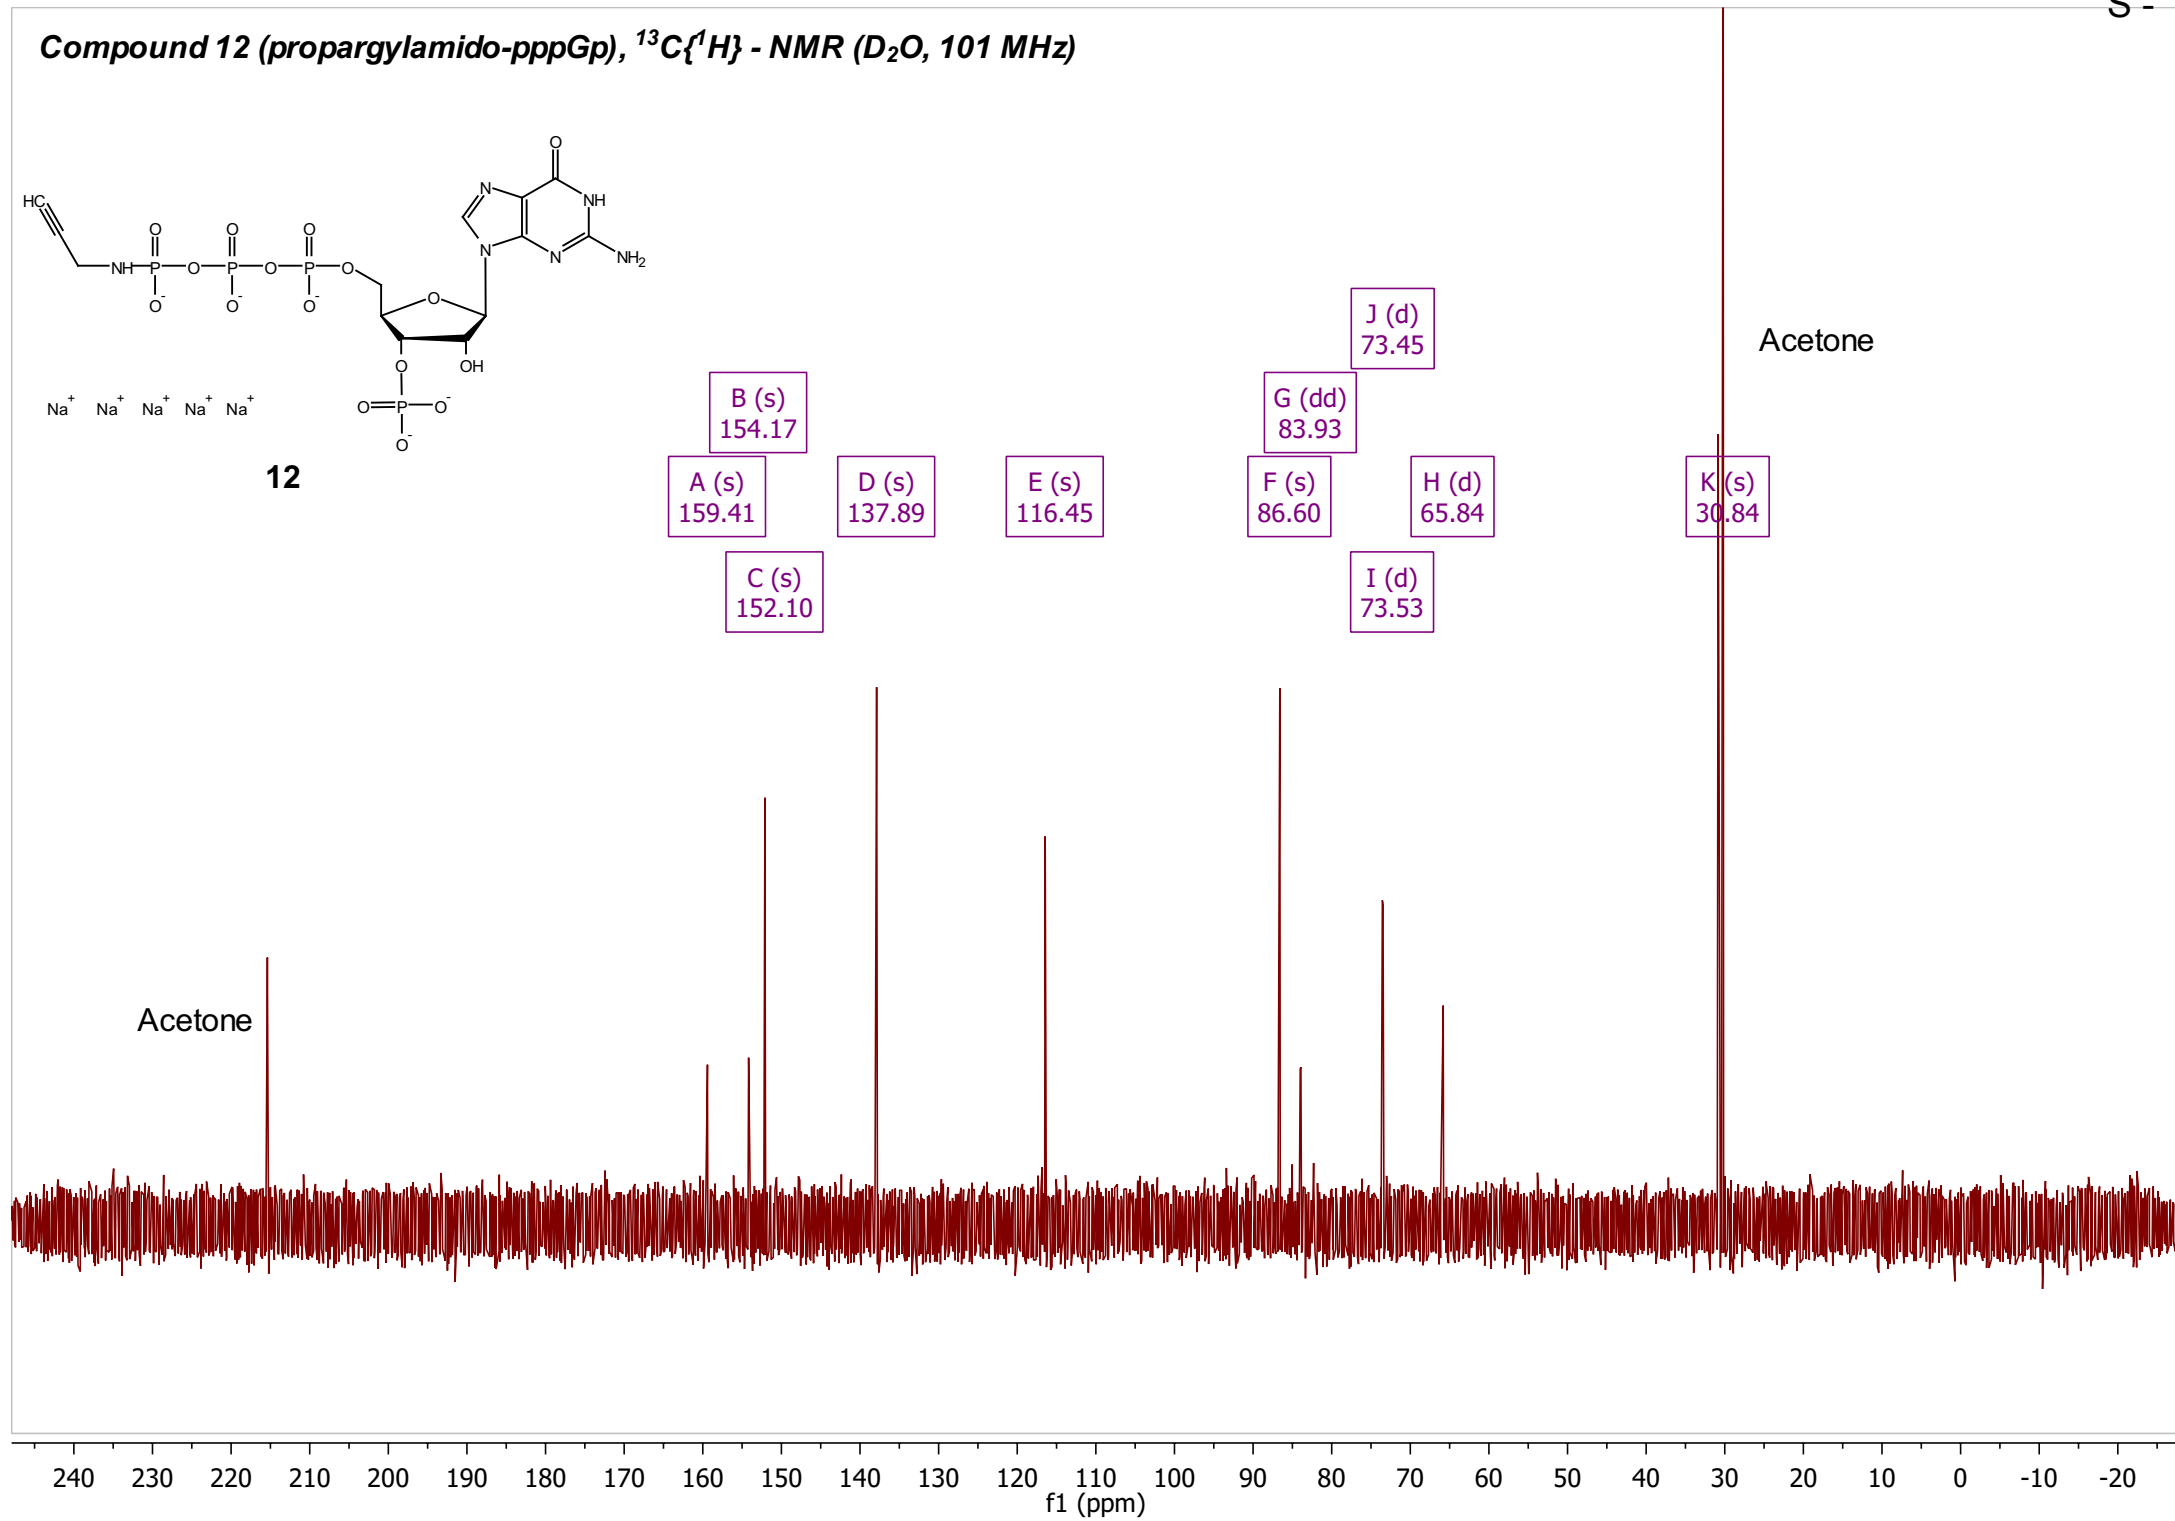

Compound 13 (amido-pppAp), <sup>1</sup>H - NMR (D<sub>2</sub>O, 400 MHz)

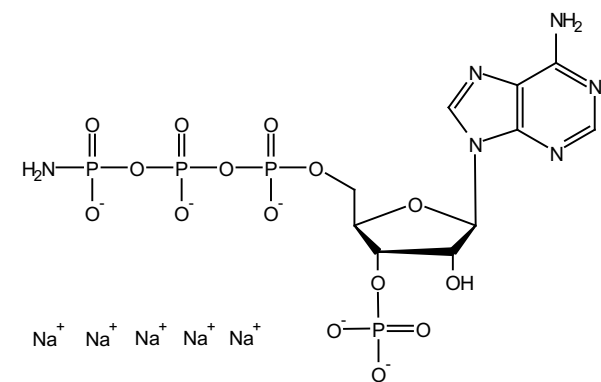

13

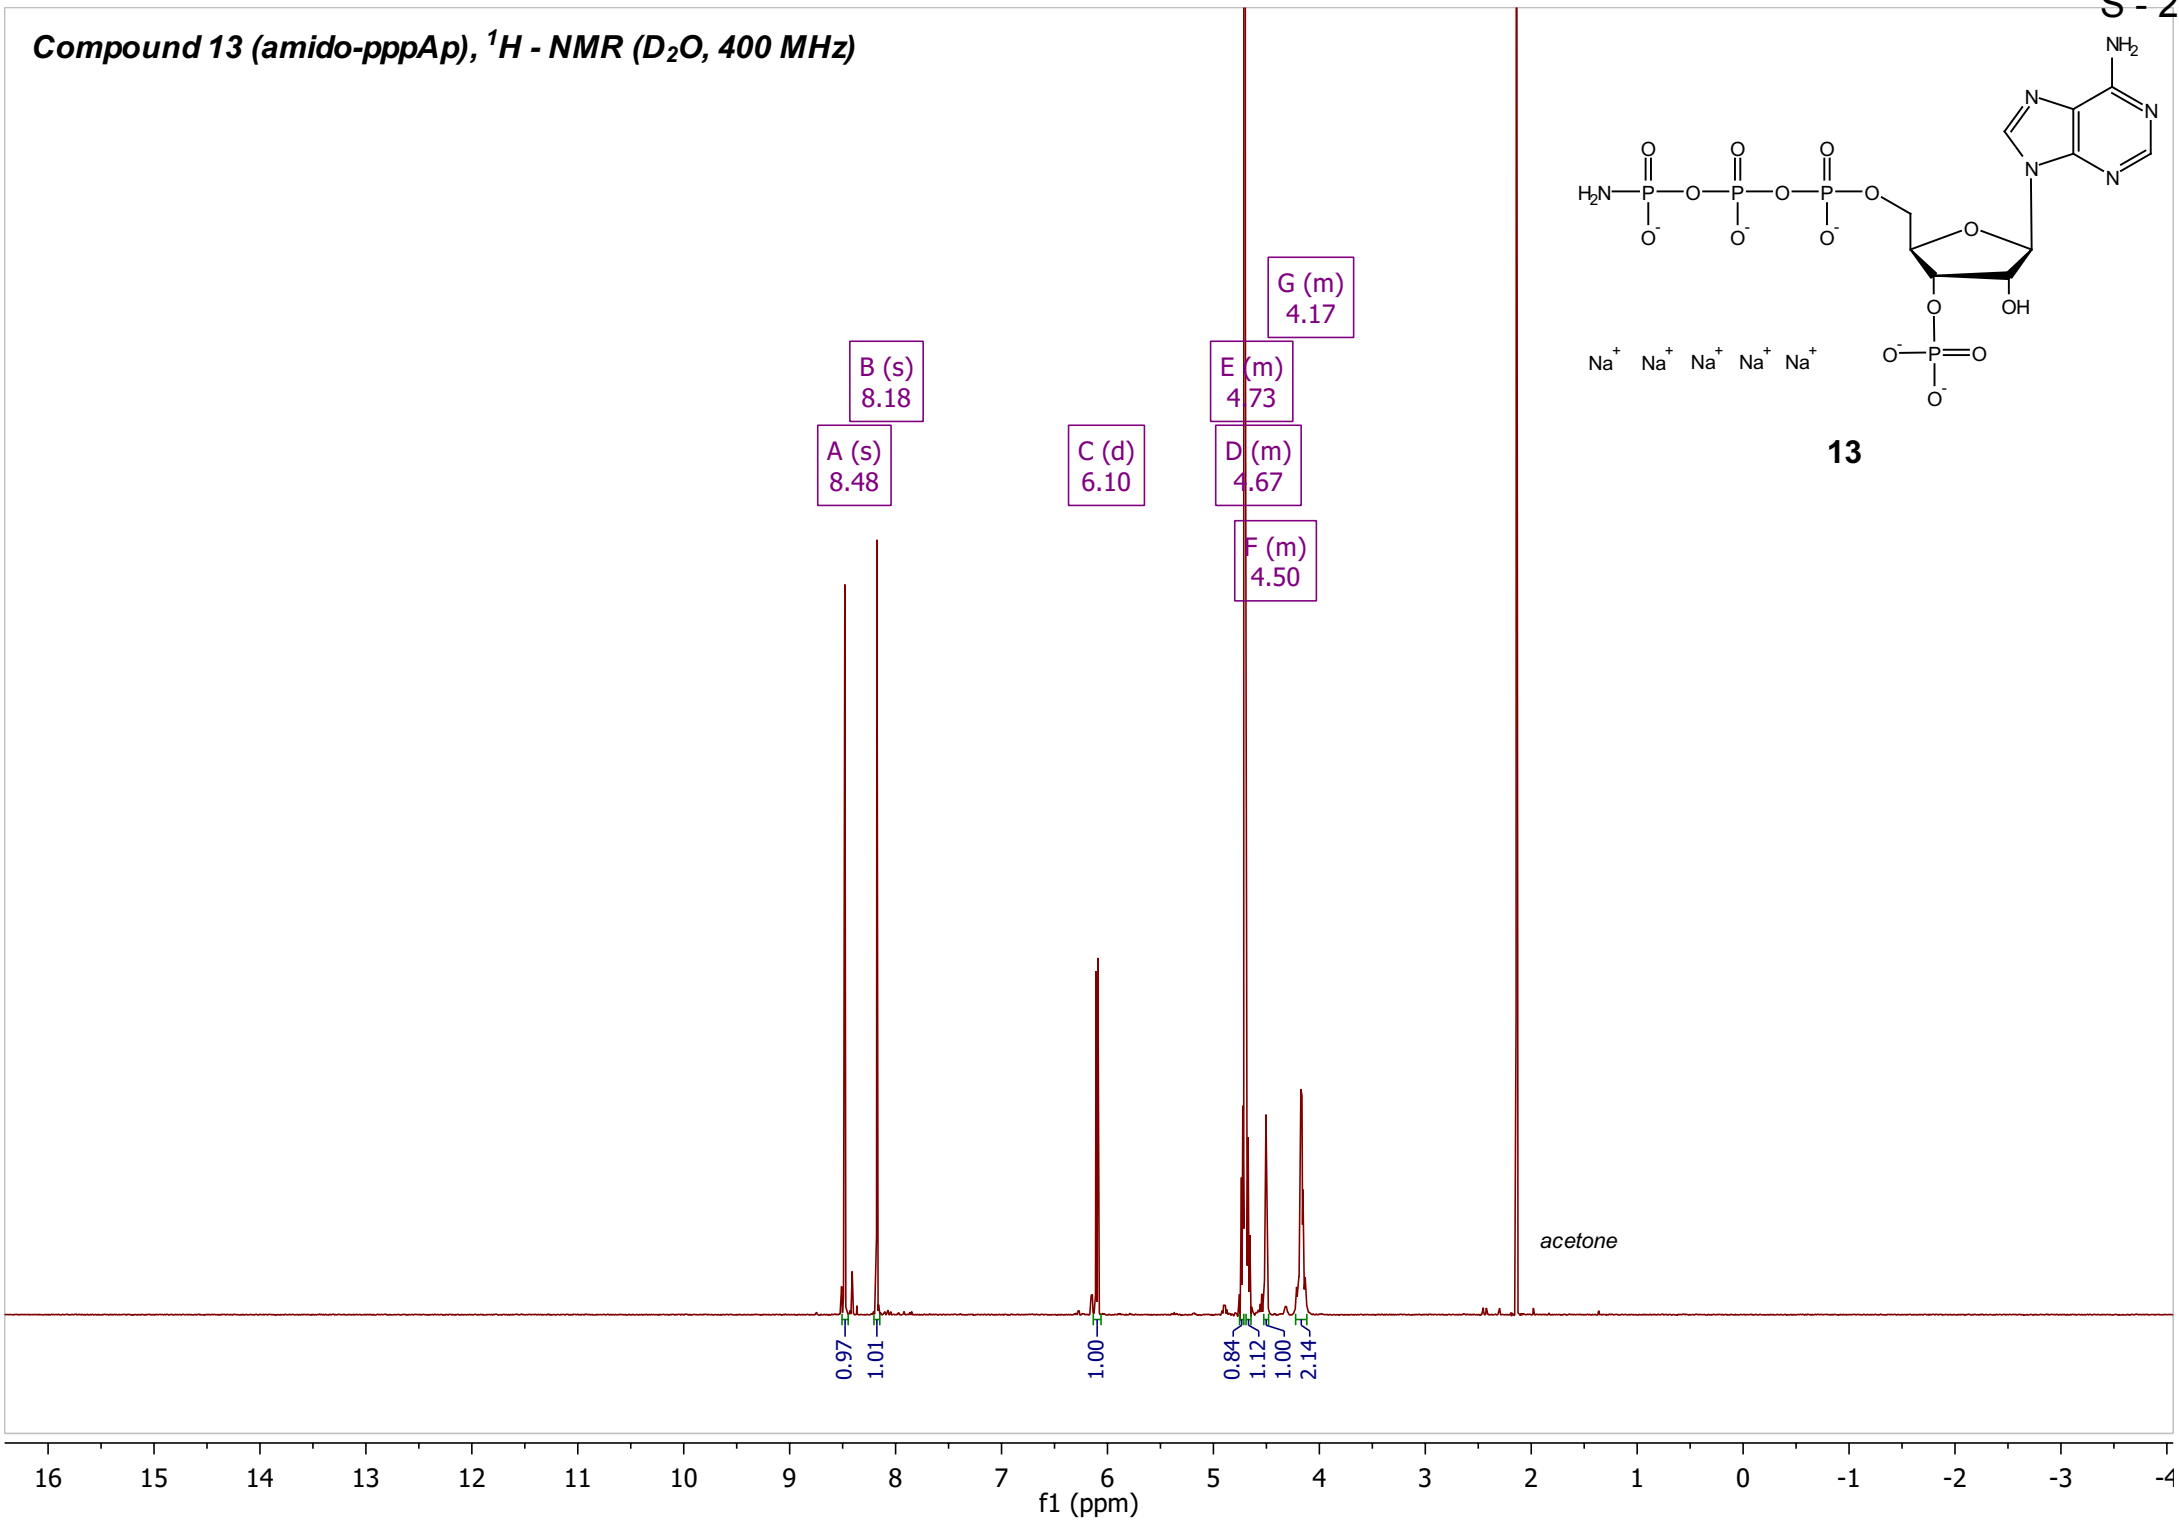

Compound 13 (amido-pppAp),  $^1\text{H}$   $\{^31\text{P}\}$  - NMR ( $\text{D}_2\text{O}$ , 400 MHz)

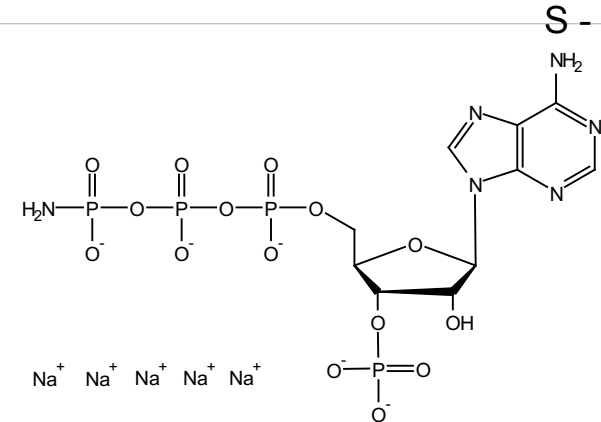

13

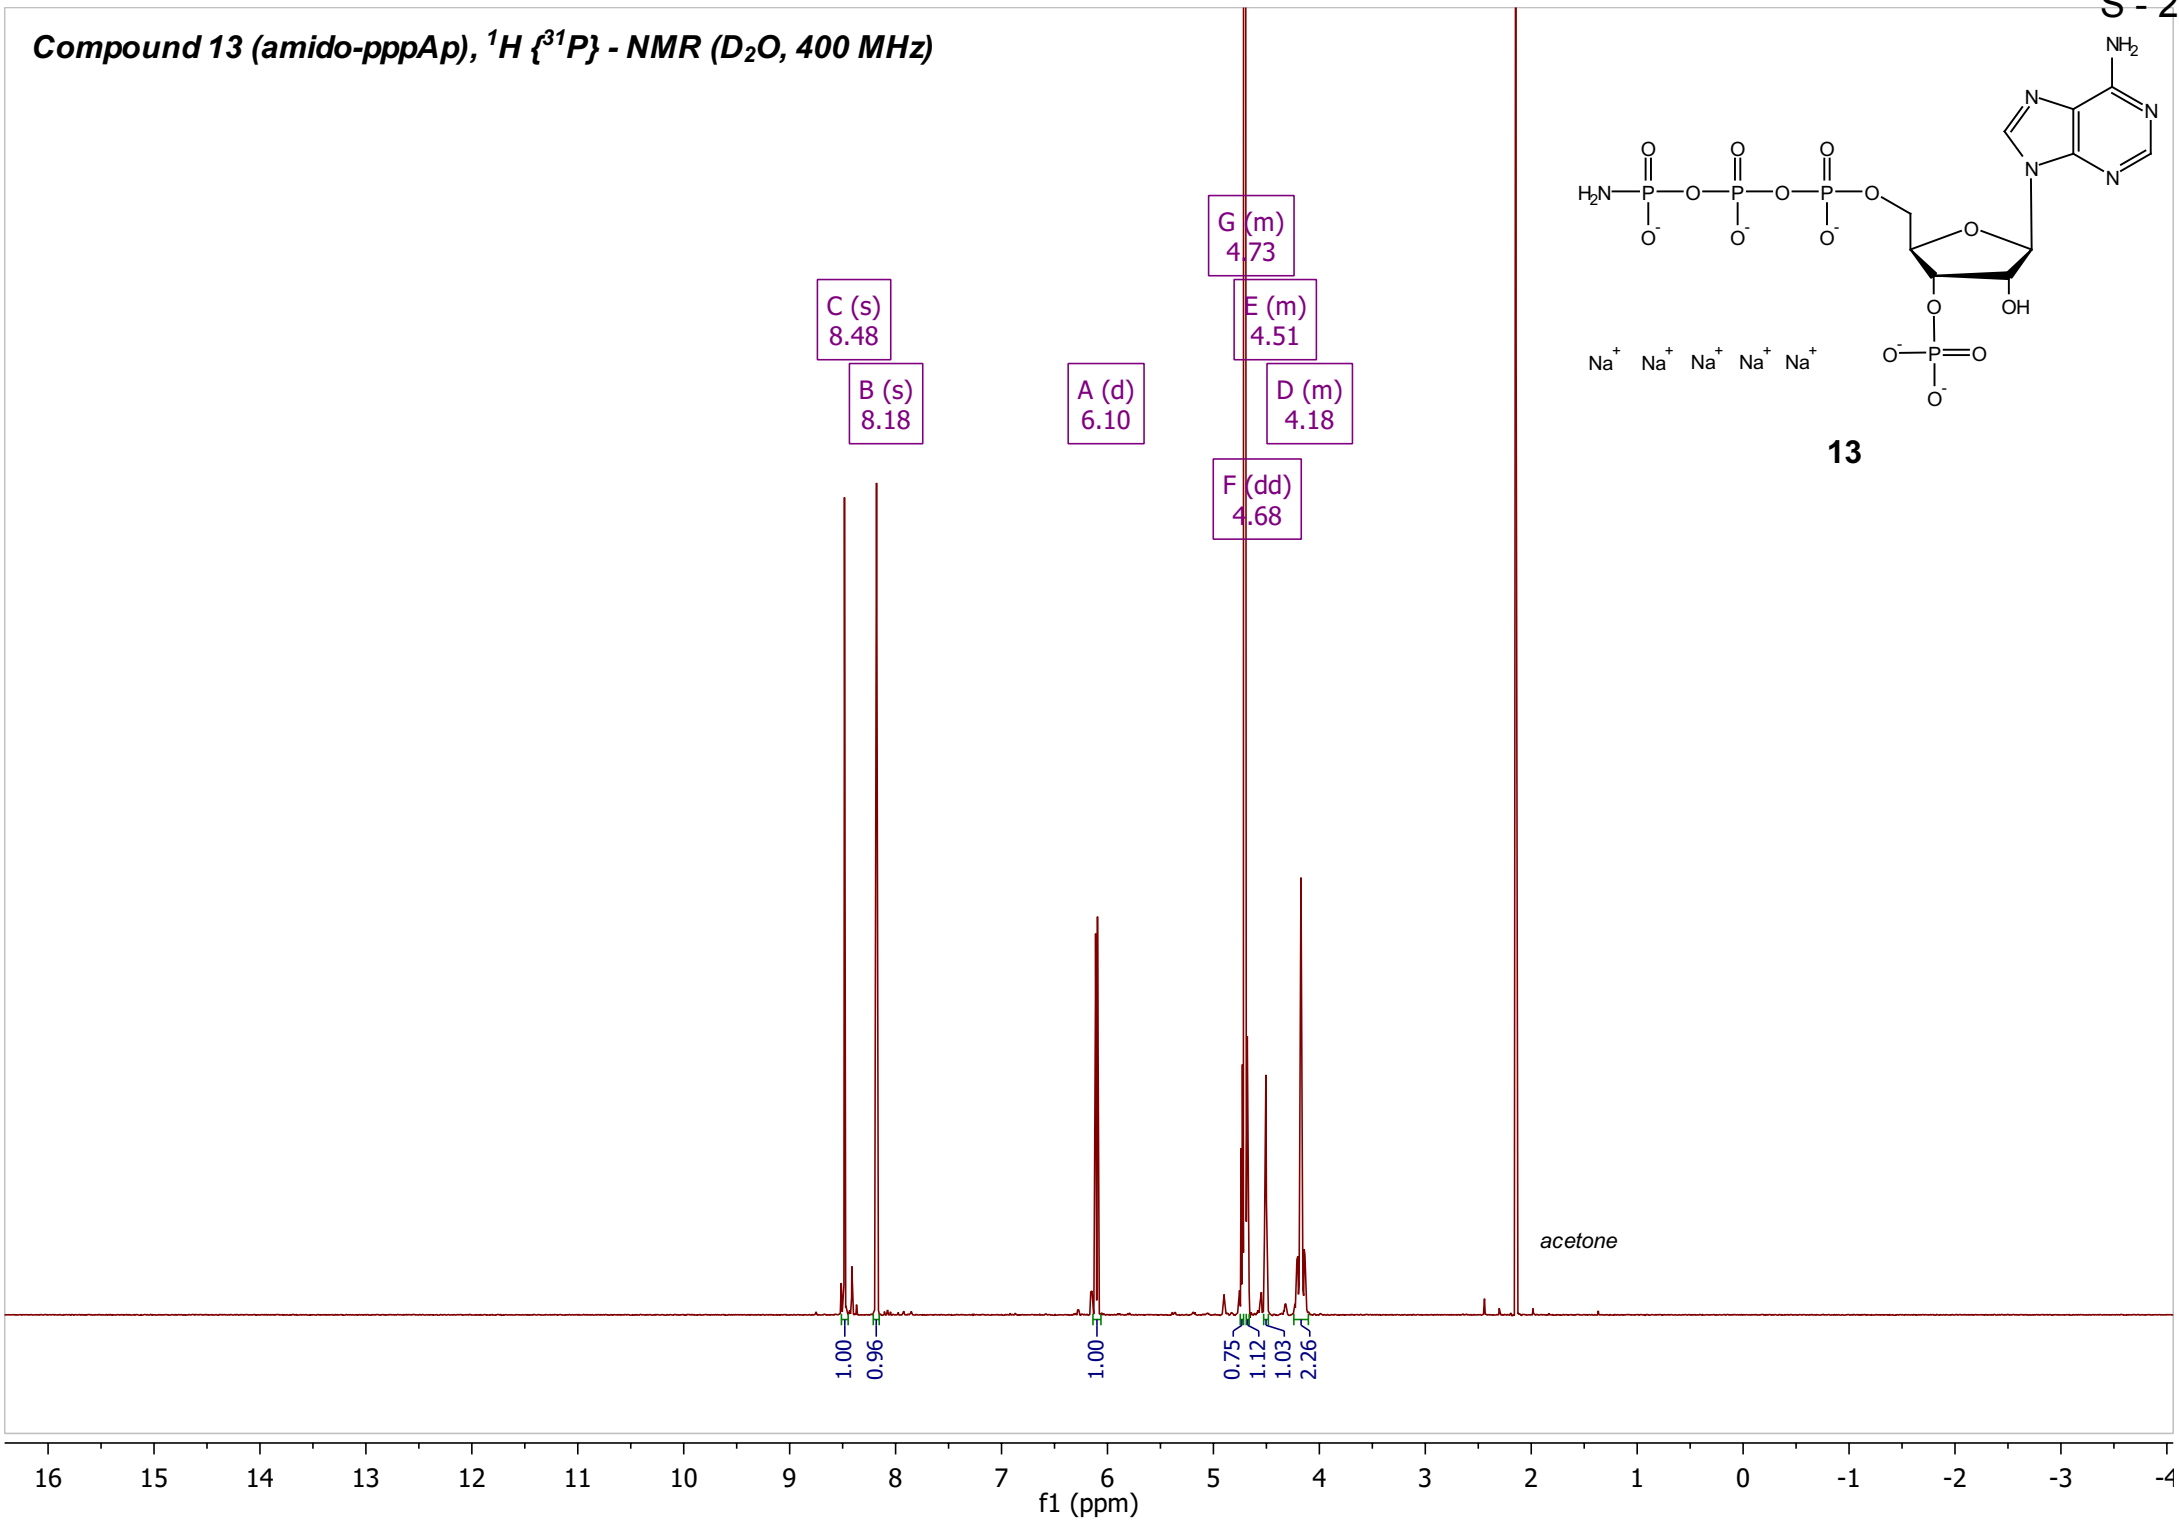

Compound 13 (amido-pppAp),  $^{31}\text{P}\{^1\text{H}\}$  - NMR ( $\text{D}_2\text{O}$ , 162 MHz)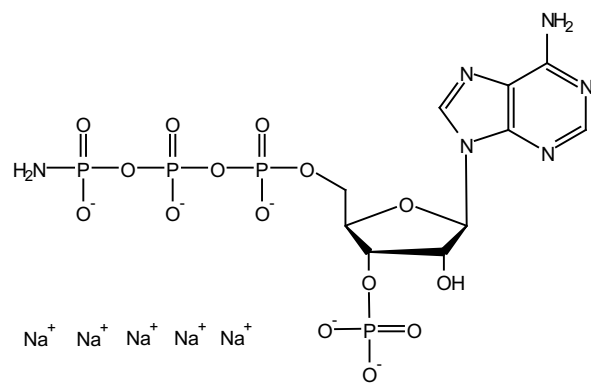

13

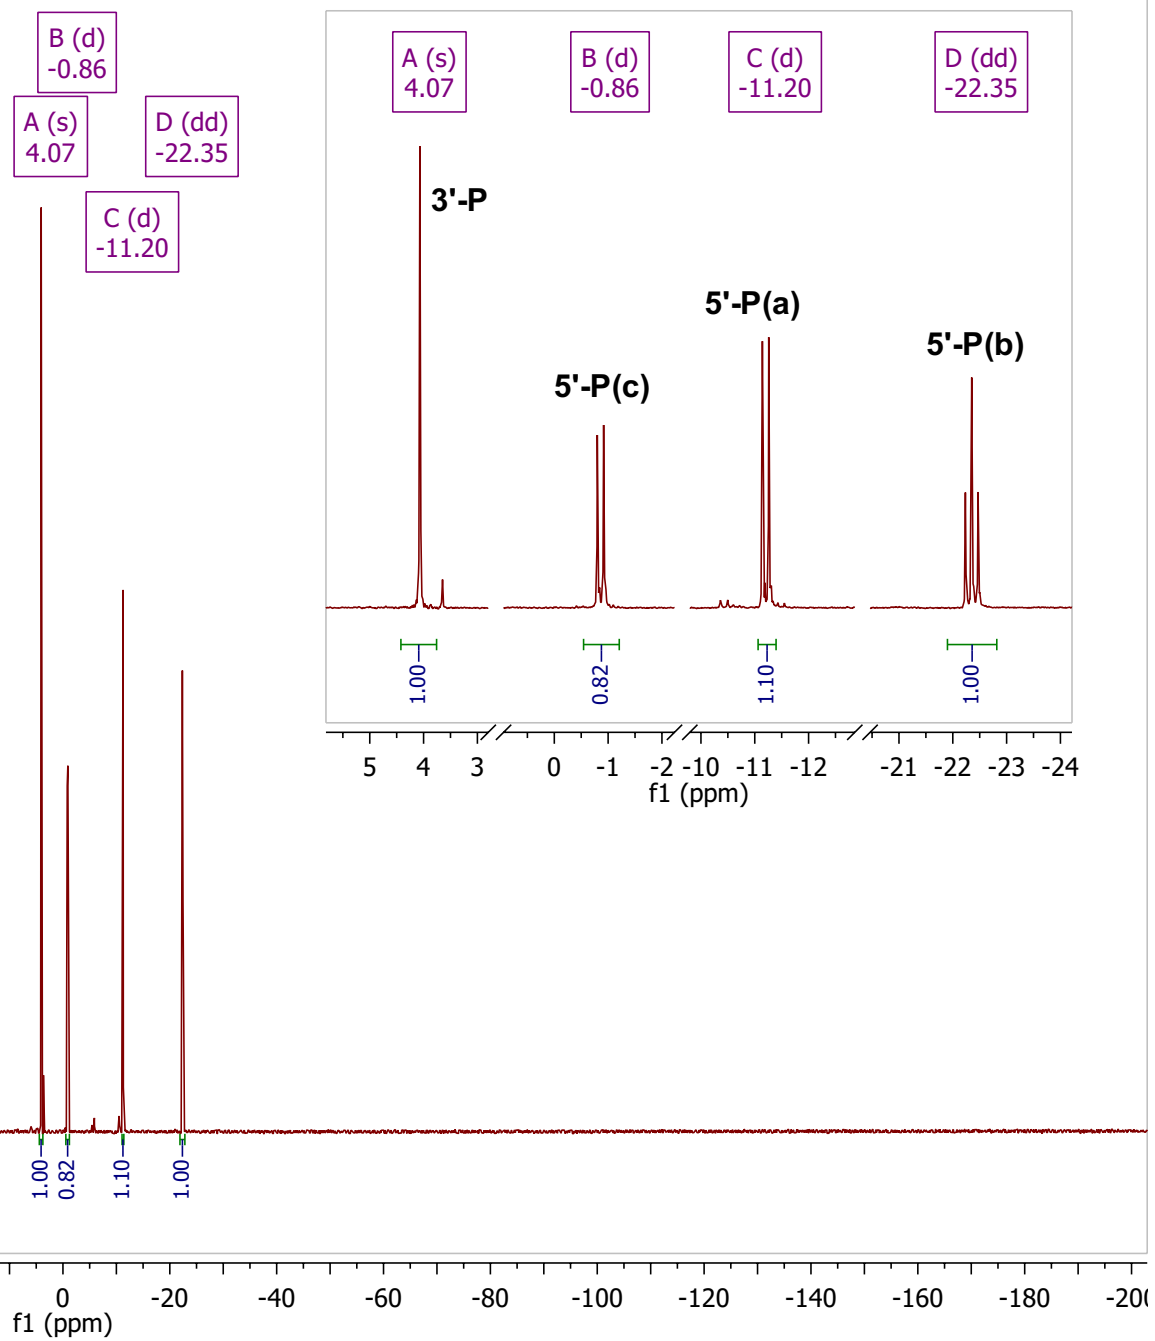

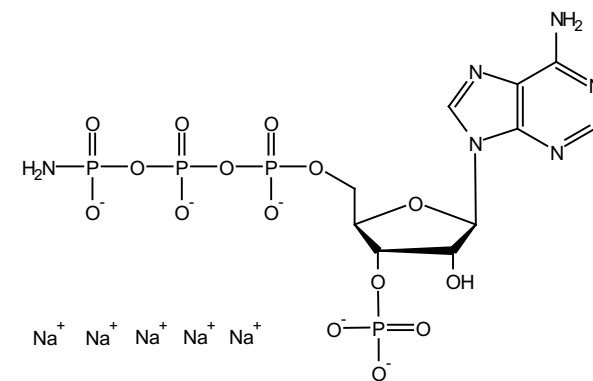

13

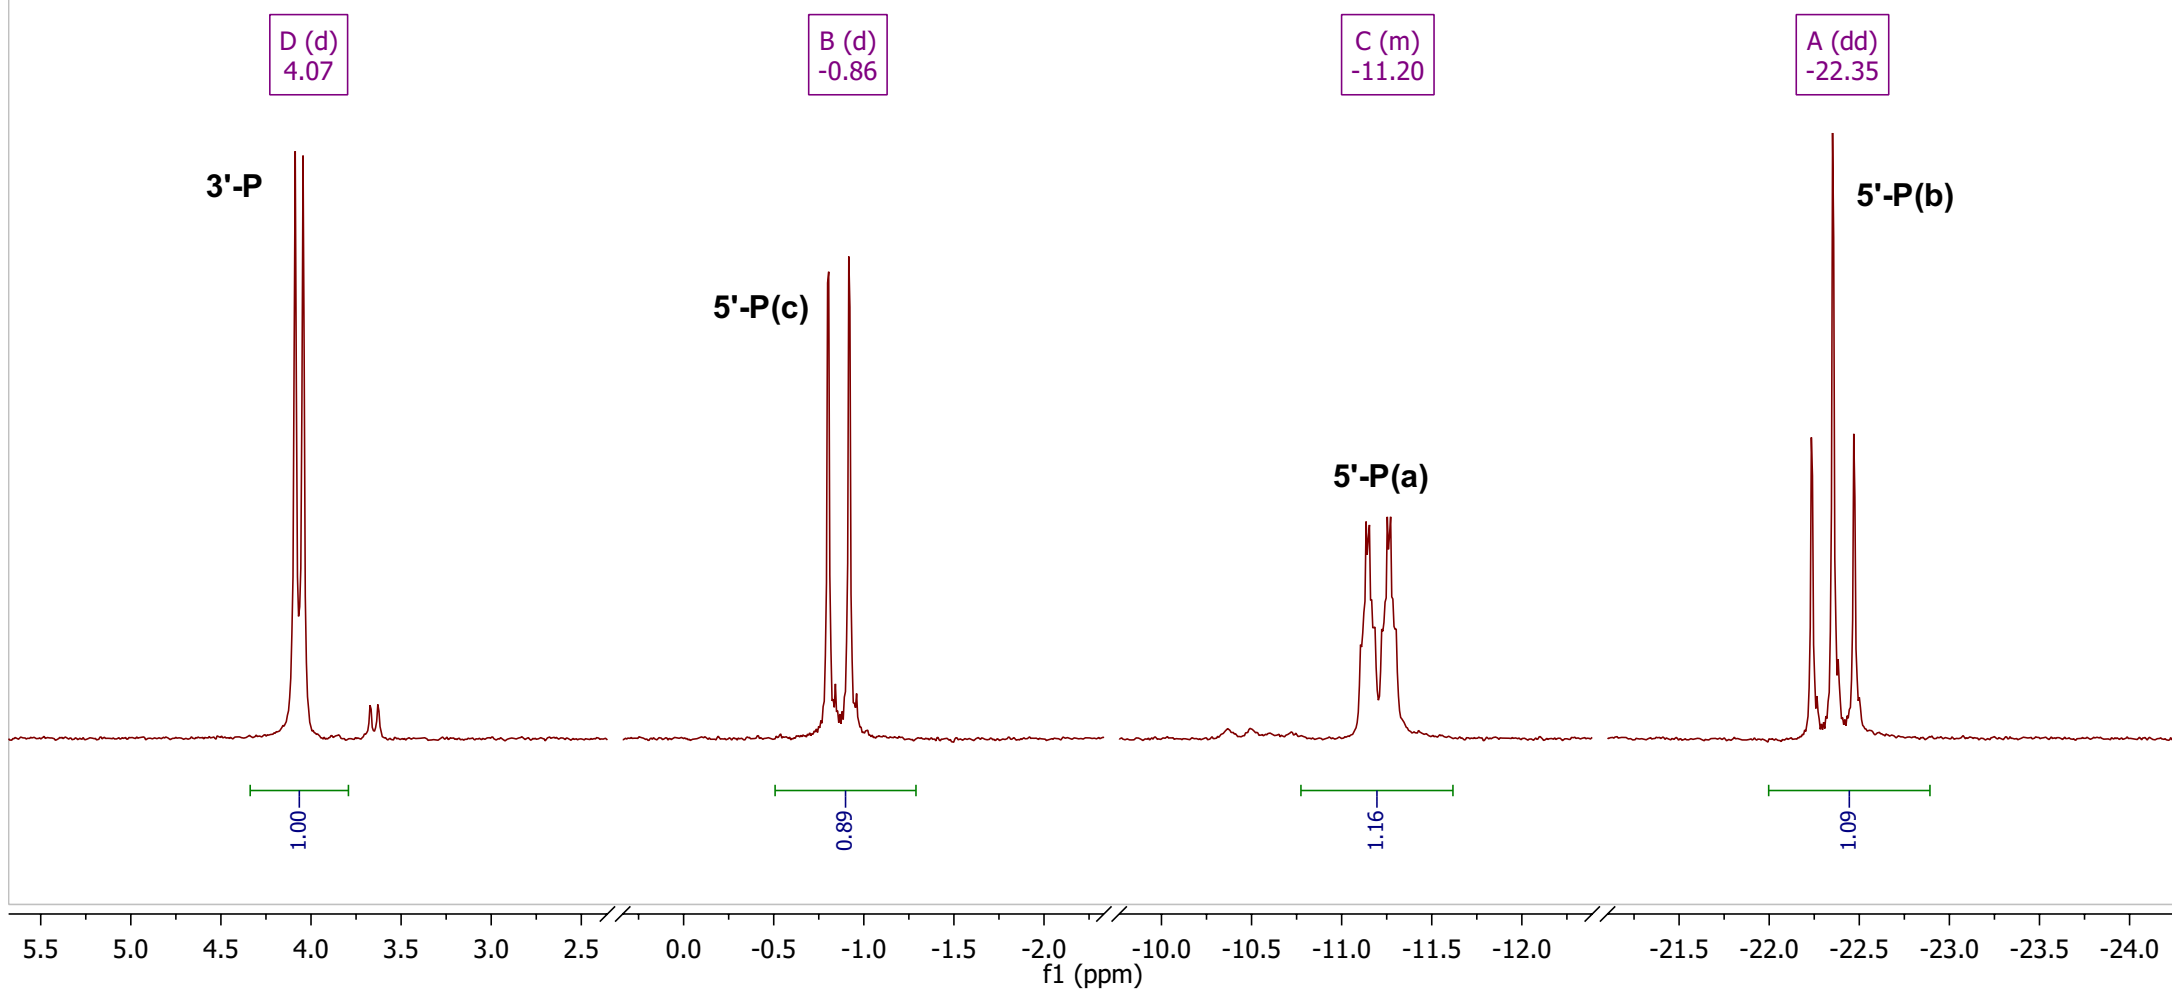



Compound 13 (amido-pppAp), DQF-COSY (D<sub>2</sub>O, 162 MHz)

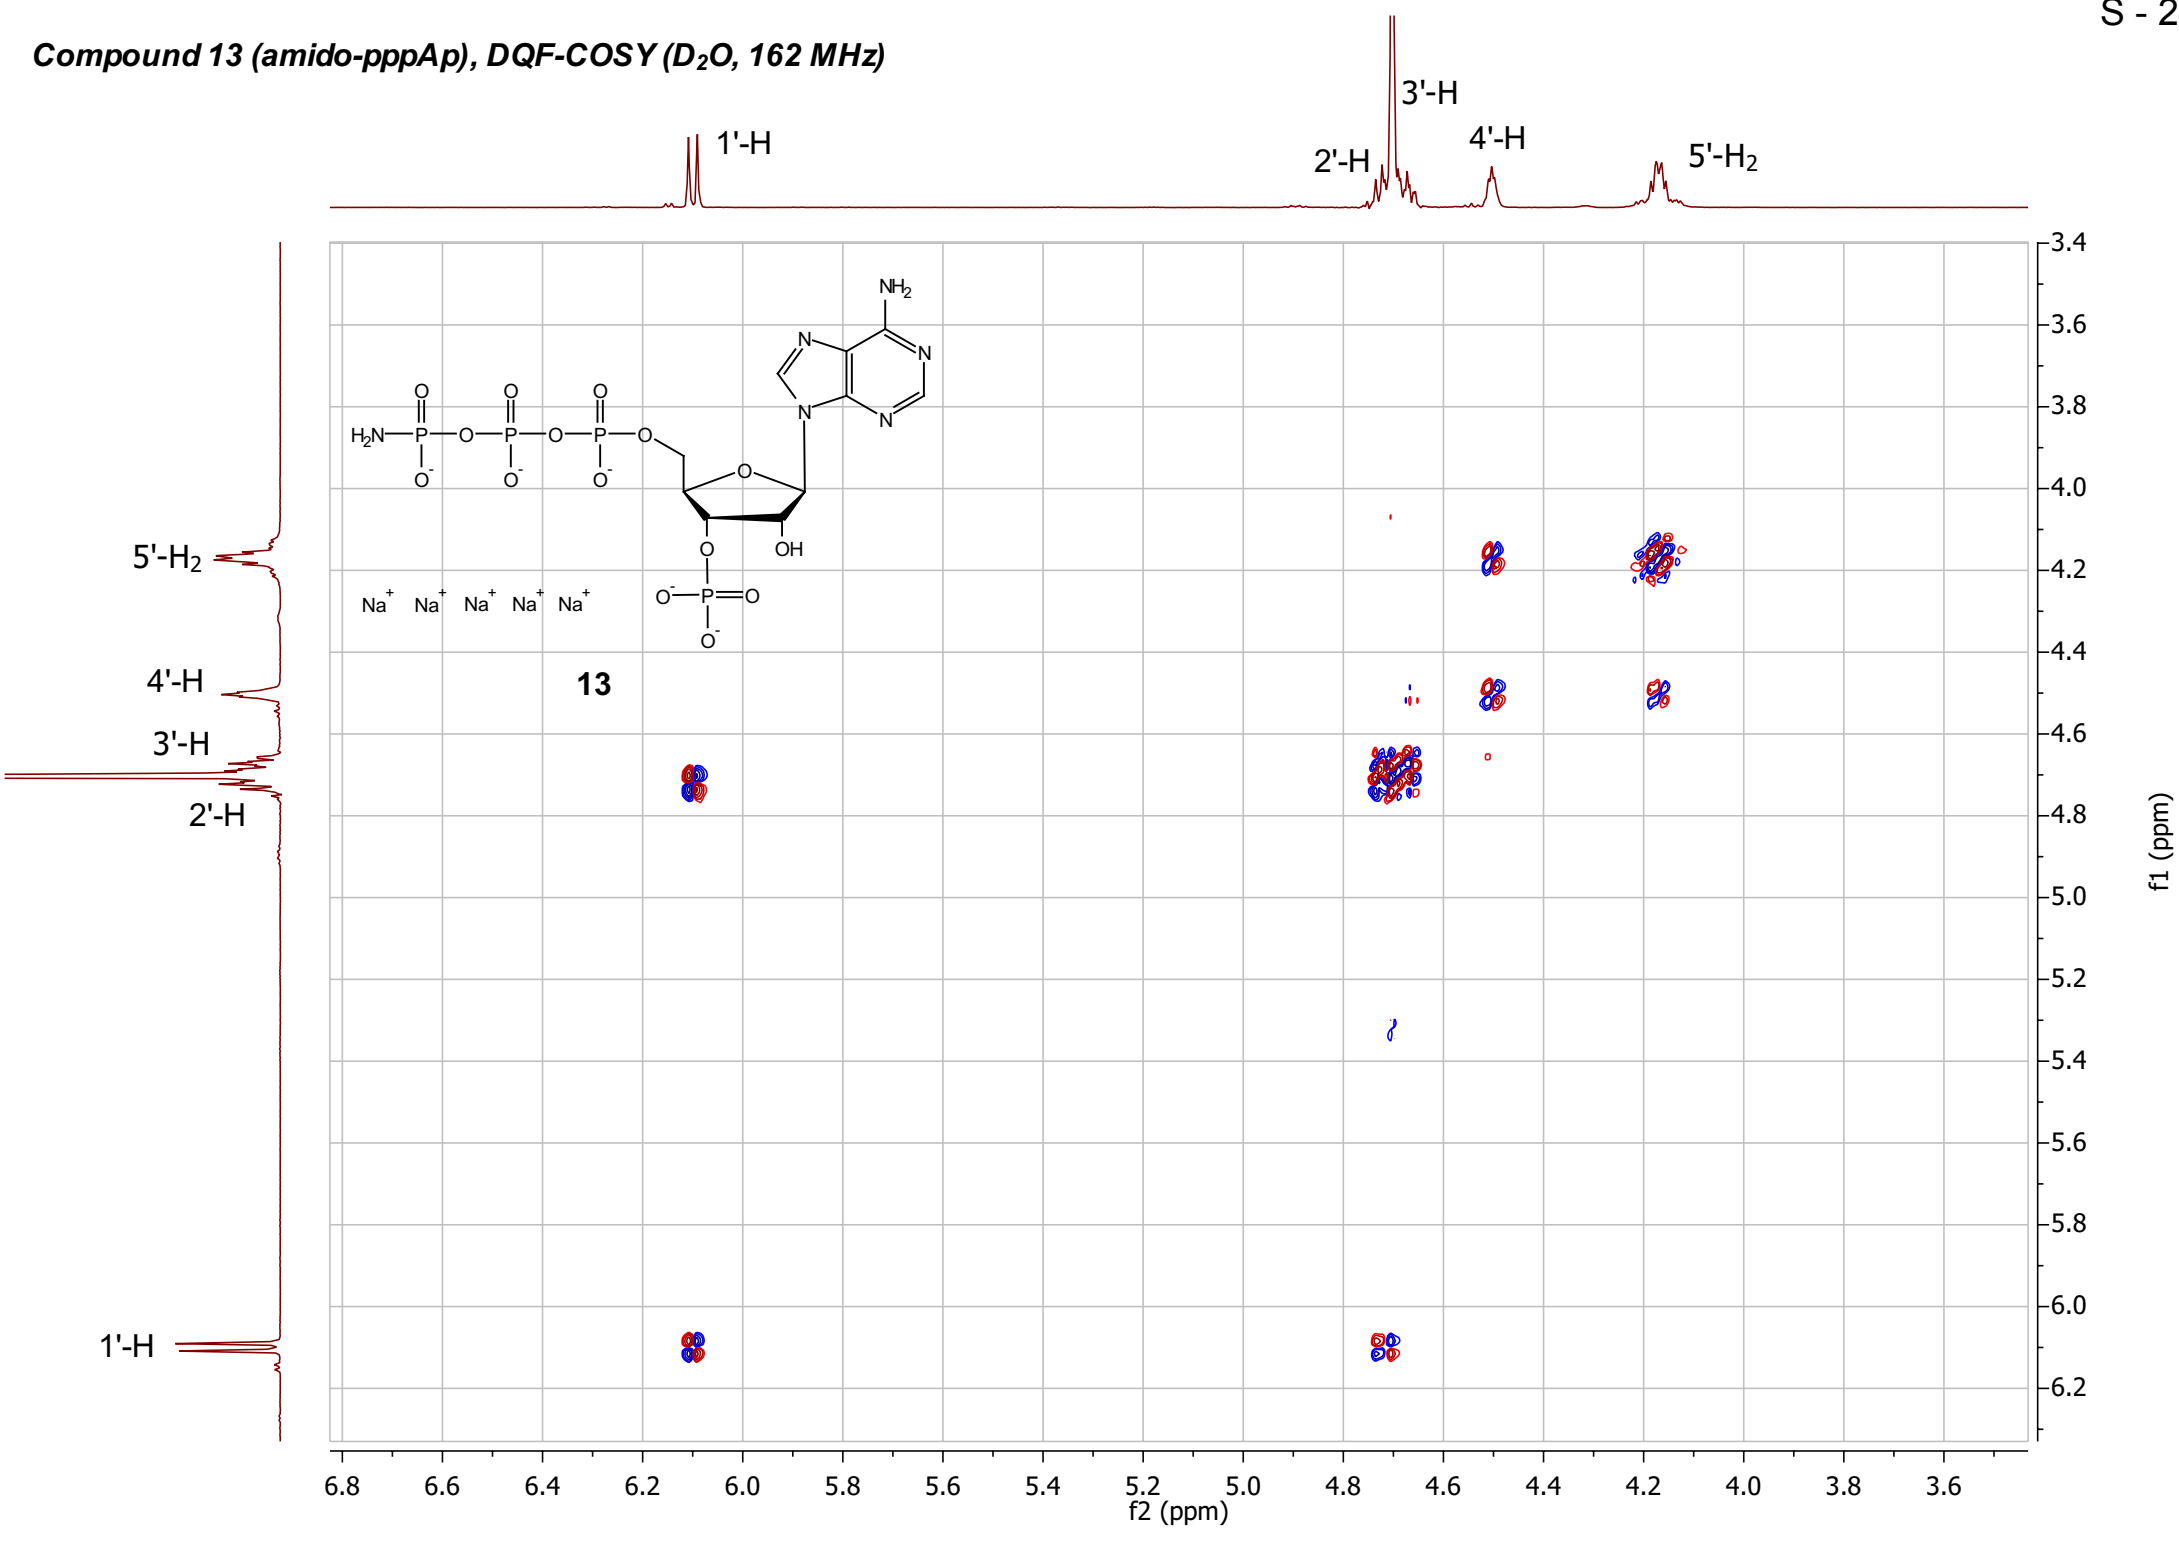

Compound 13 (amido-pppAp), DQF-COSY (D<sub>2</sub>O, 162 MHz)

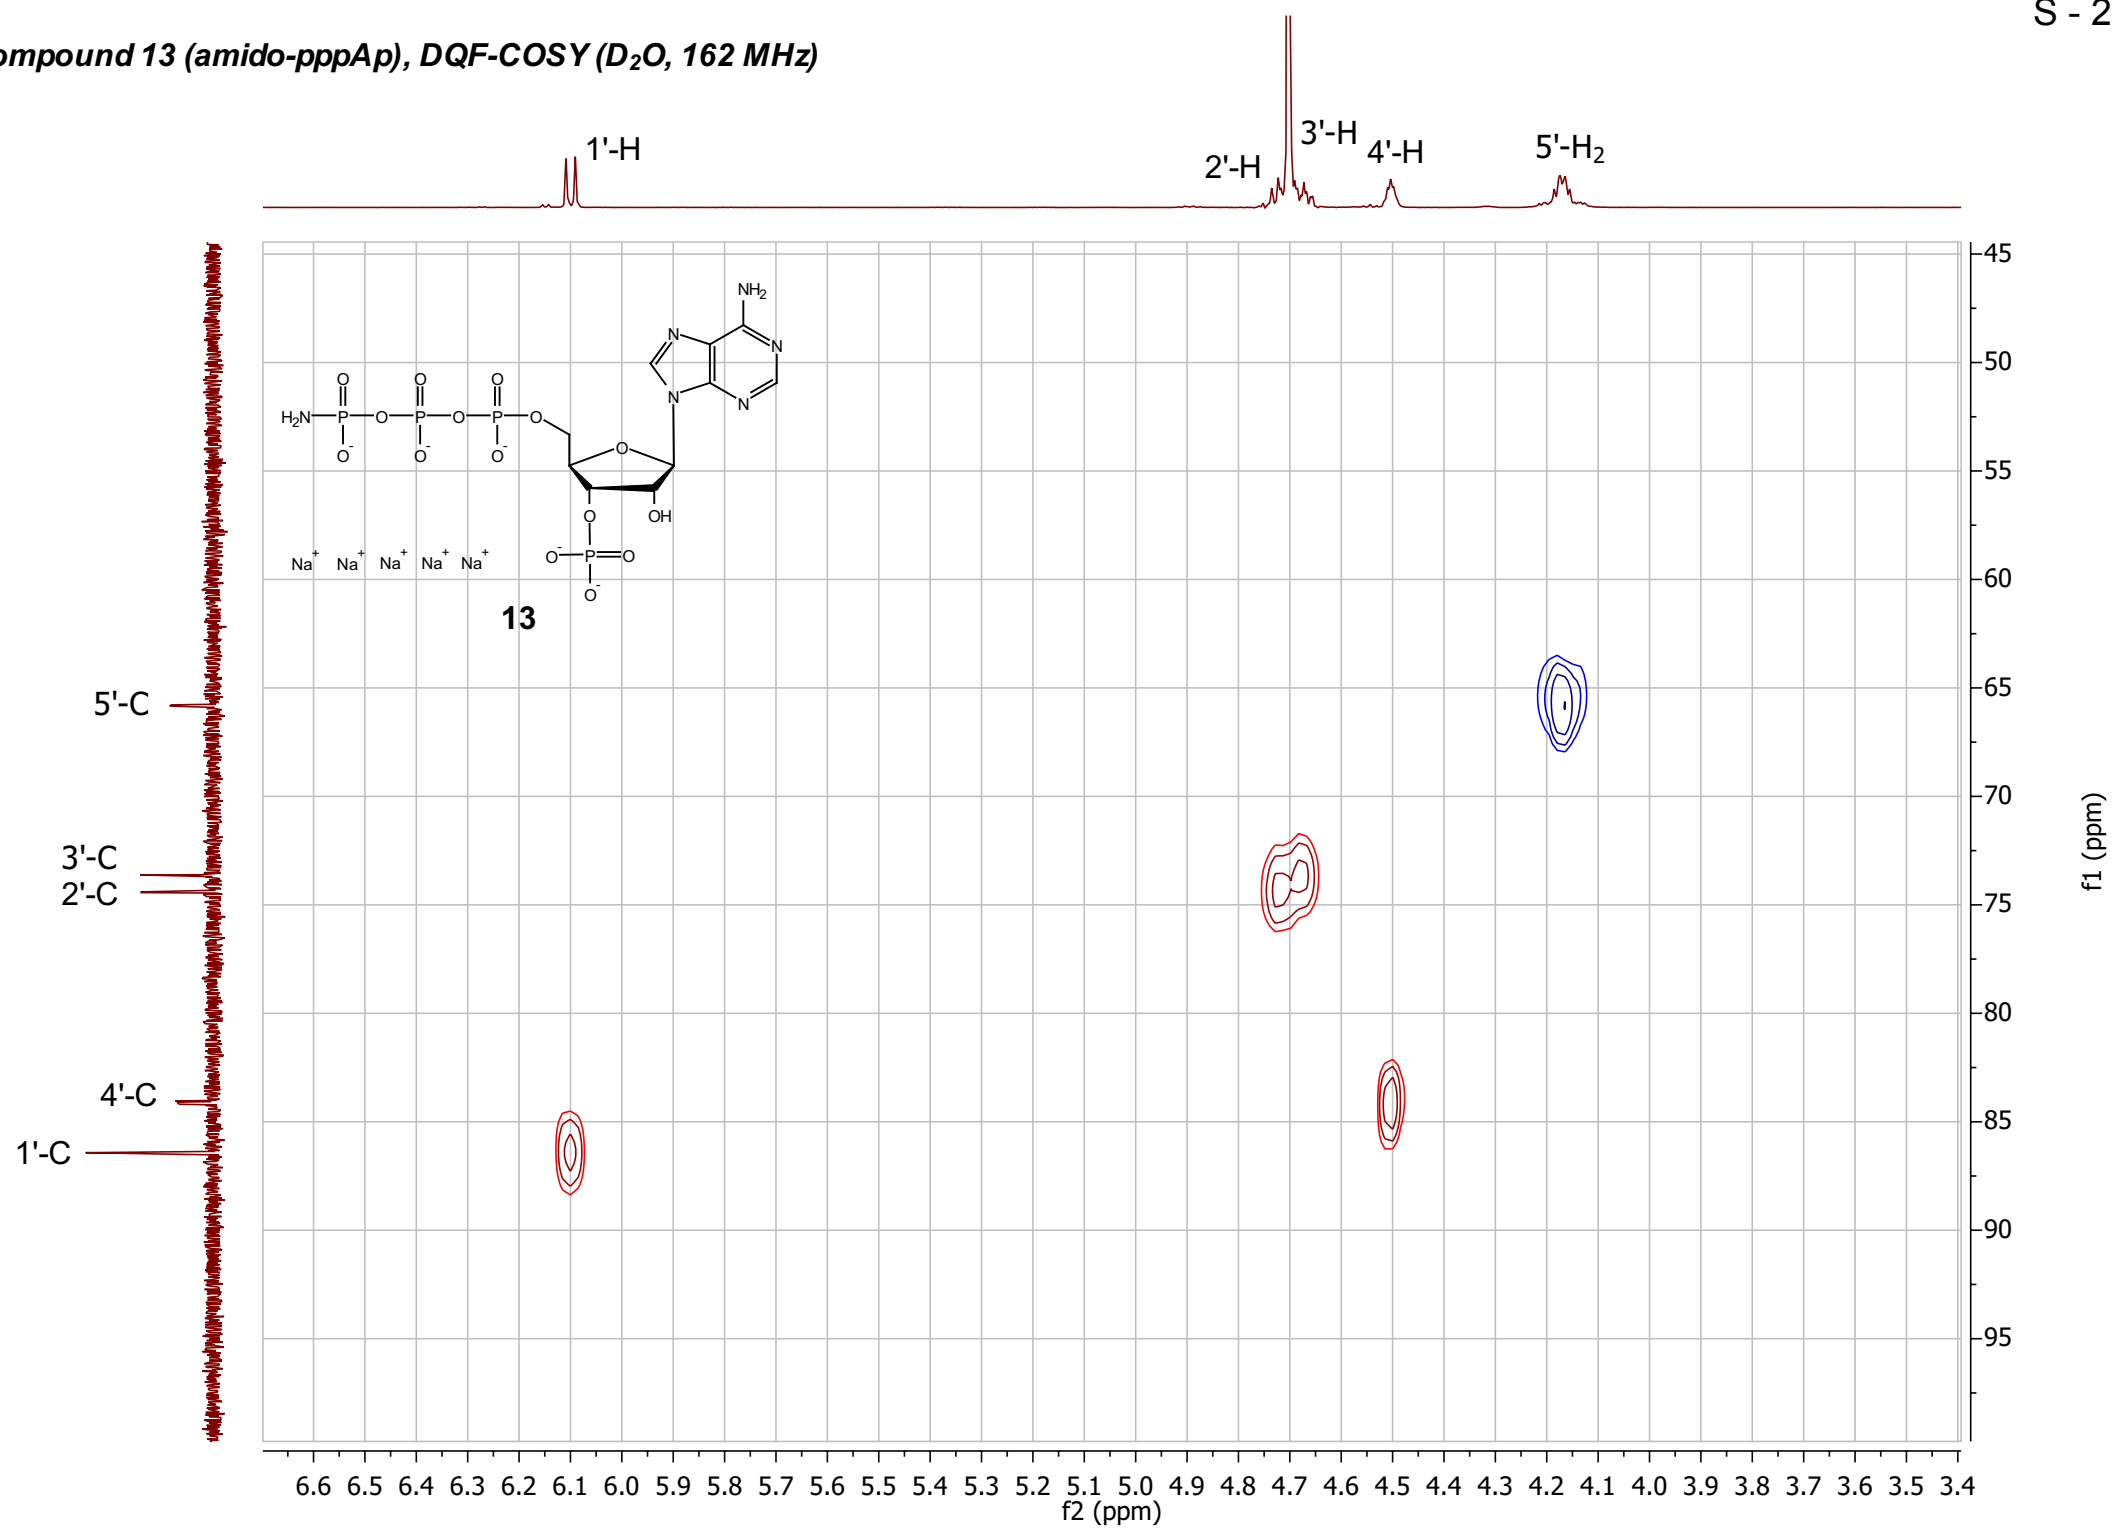

Compound 13 (amido-pppAp), <sup>1</sup>H - <sup>31</sup>P - HMBC (D<sub>2</sub>O, 162 MHz)

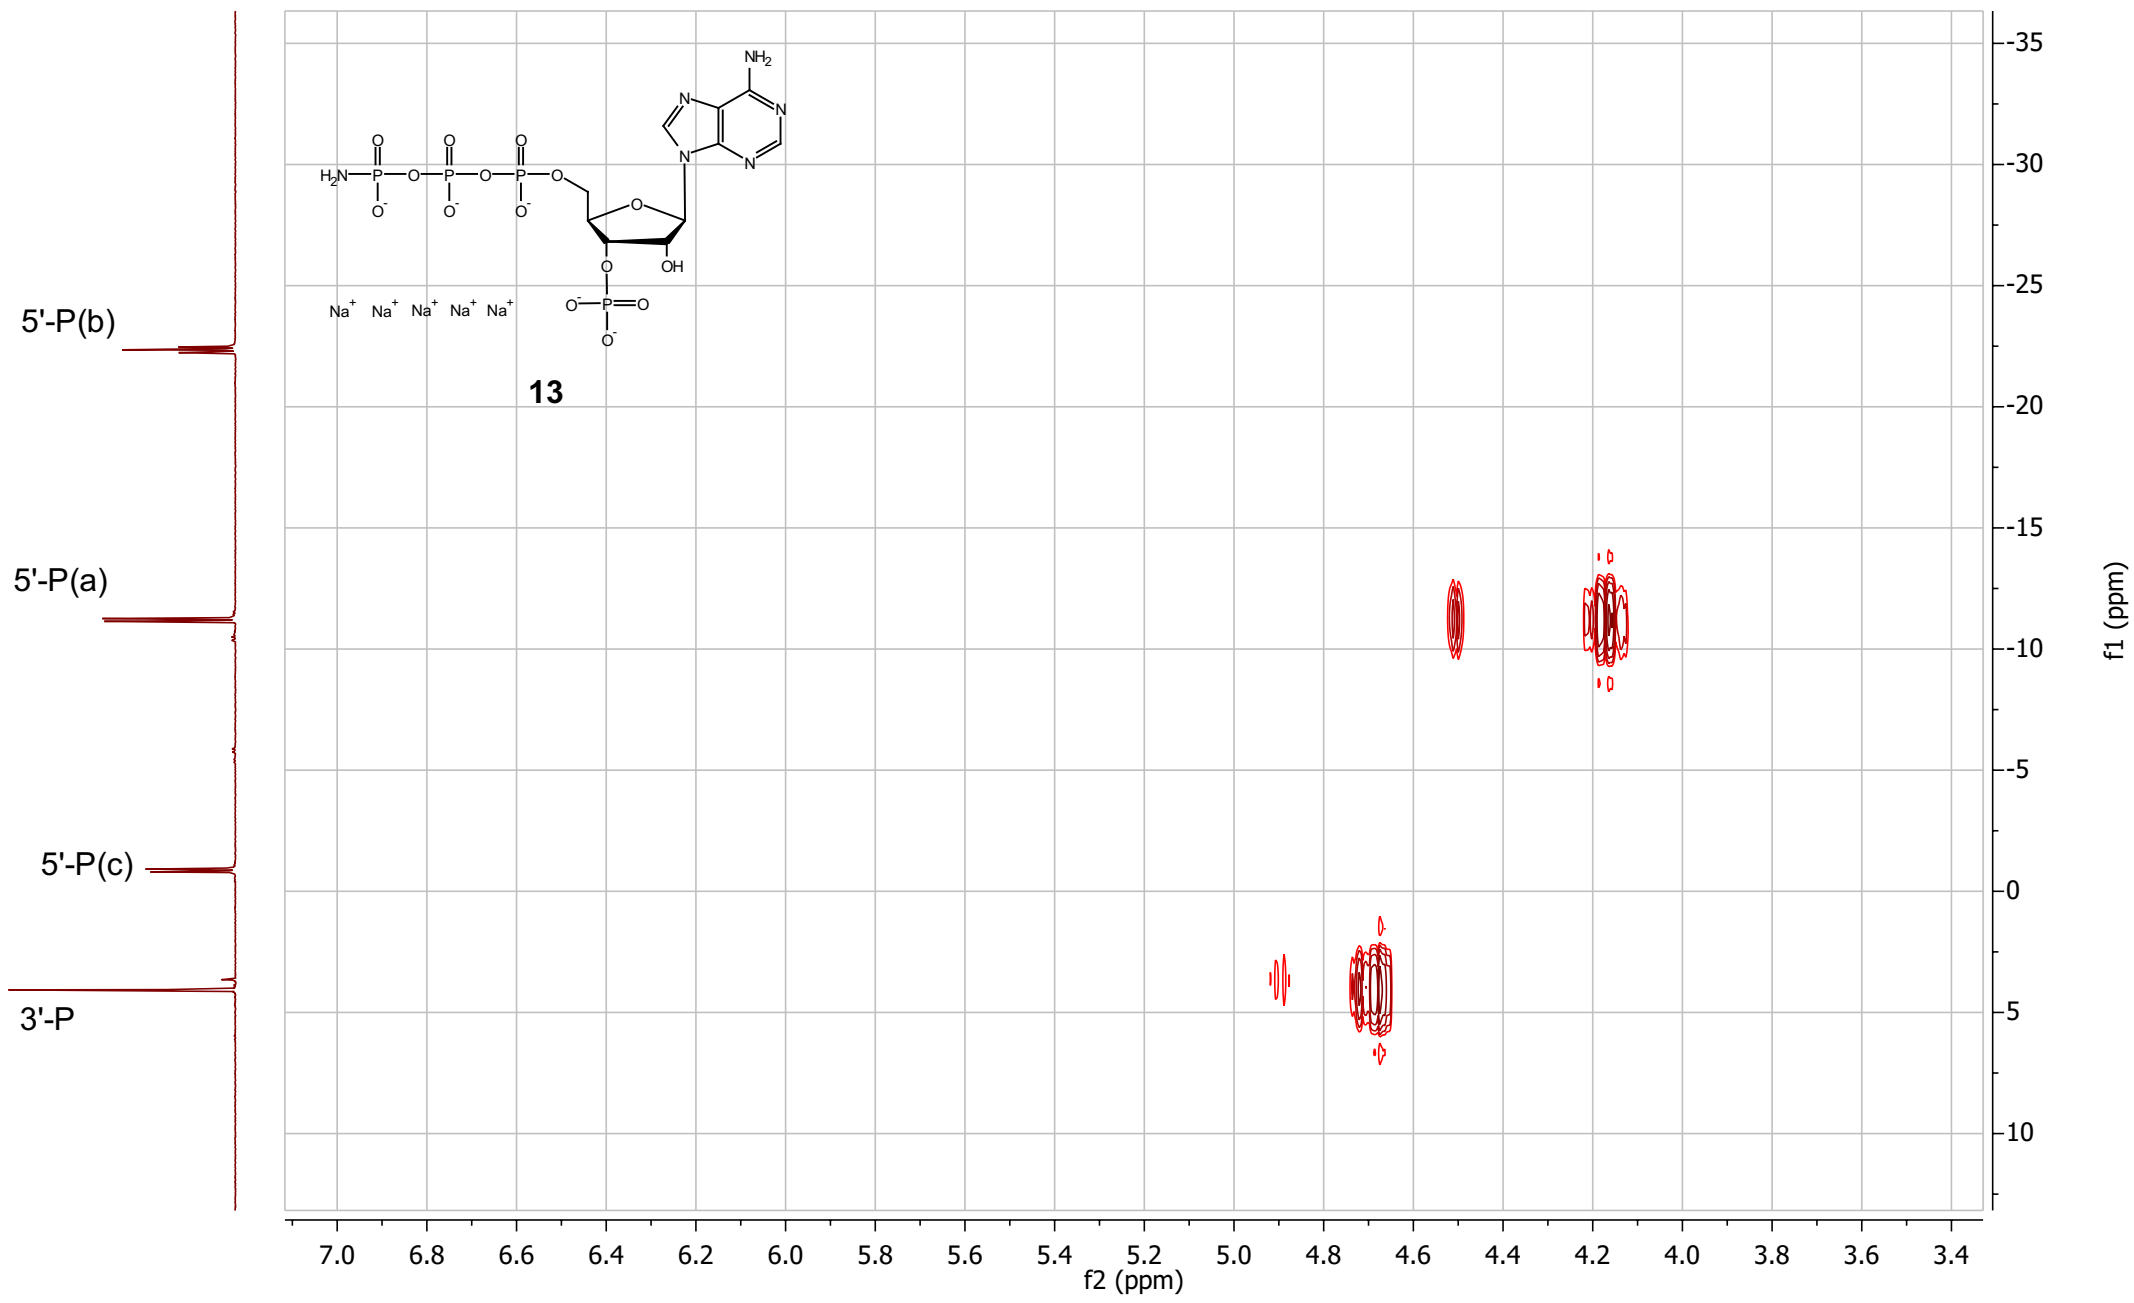

Compound 13 (amido-pppAp),  $^{13}\text{C}$   $\{^1\text{H}\}$  ( $\text{D}_2\text{O}$ , 162 MHz)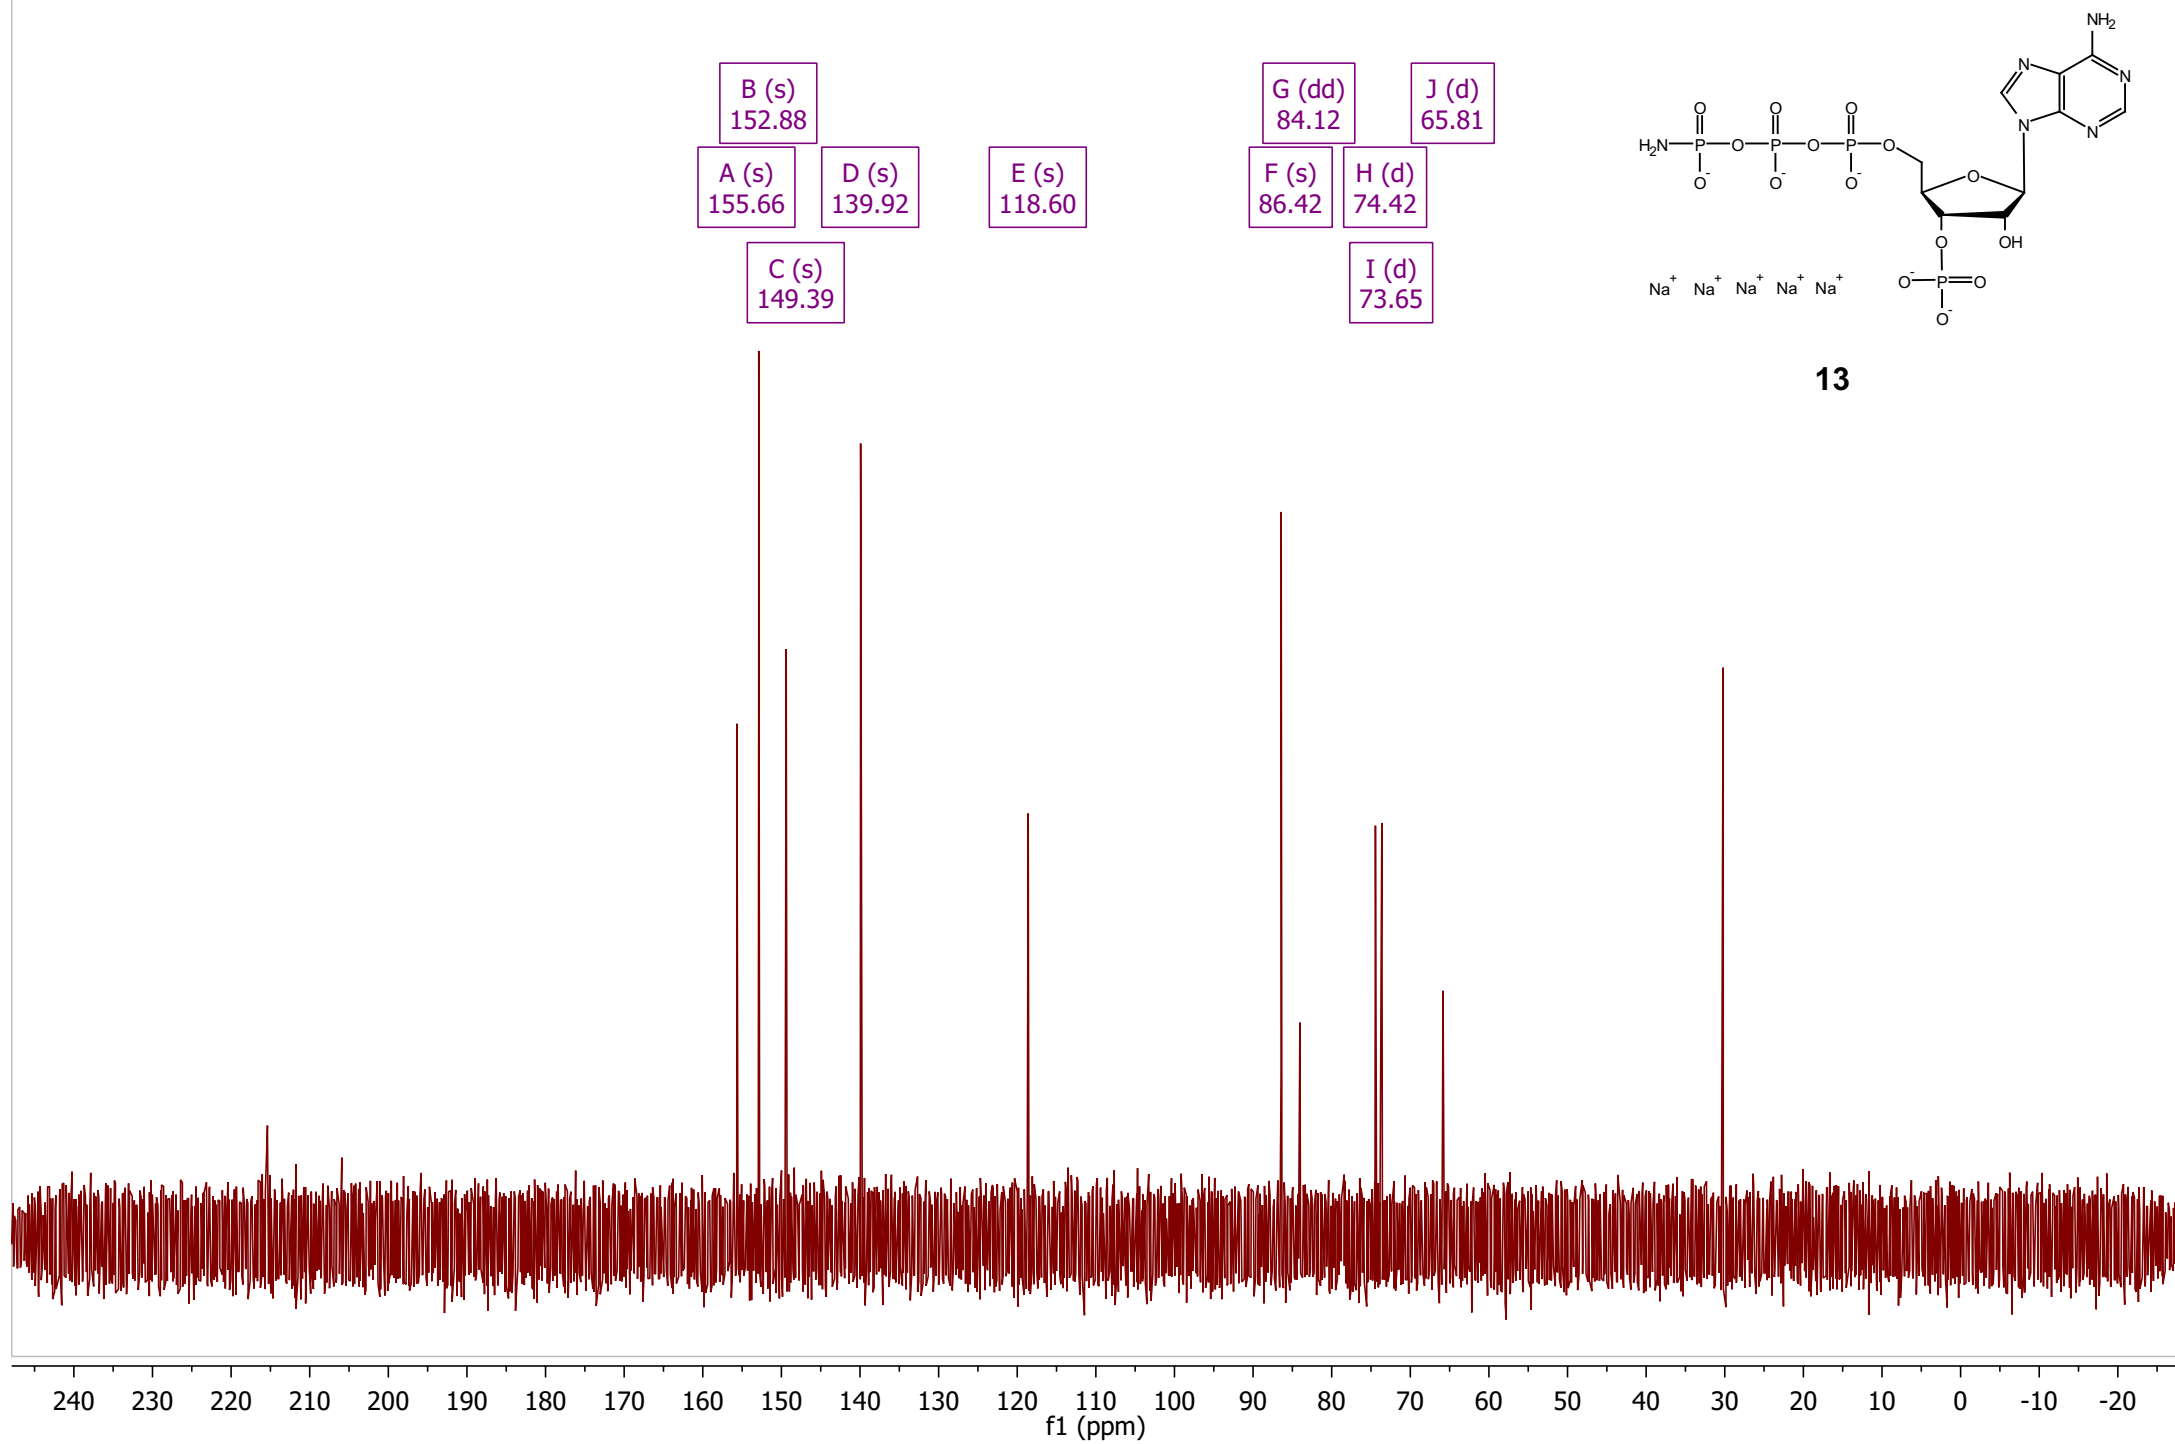

**Compound 14 (amido-pppGp),  $^1\text{H}$  - NMR ( $\text{D}_2\text{O}$ , 162 MHz)**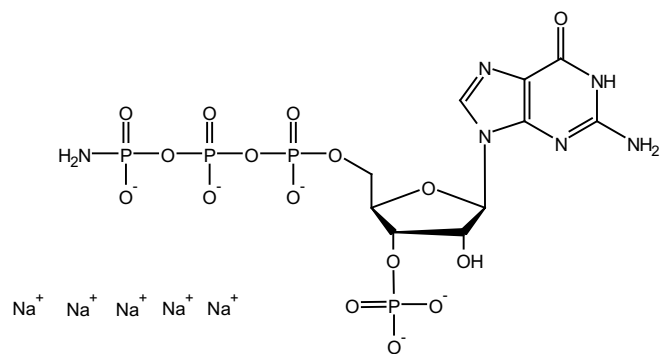**14**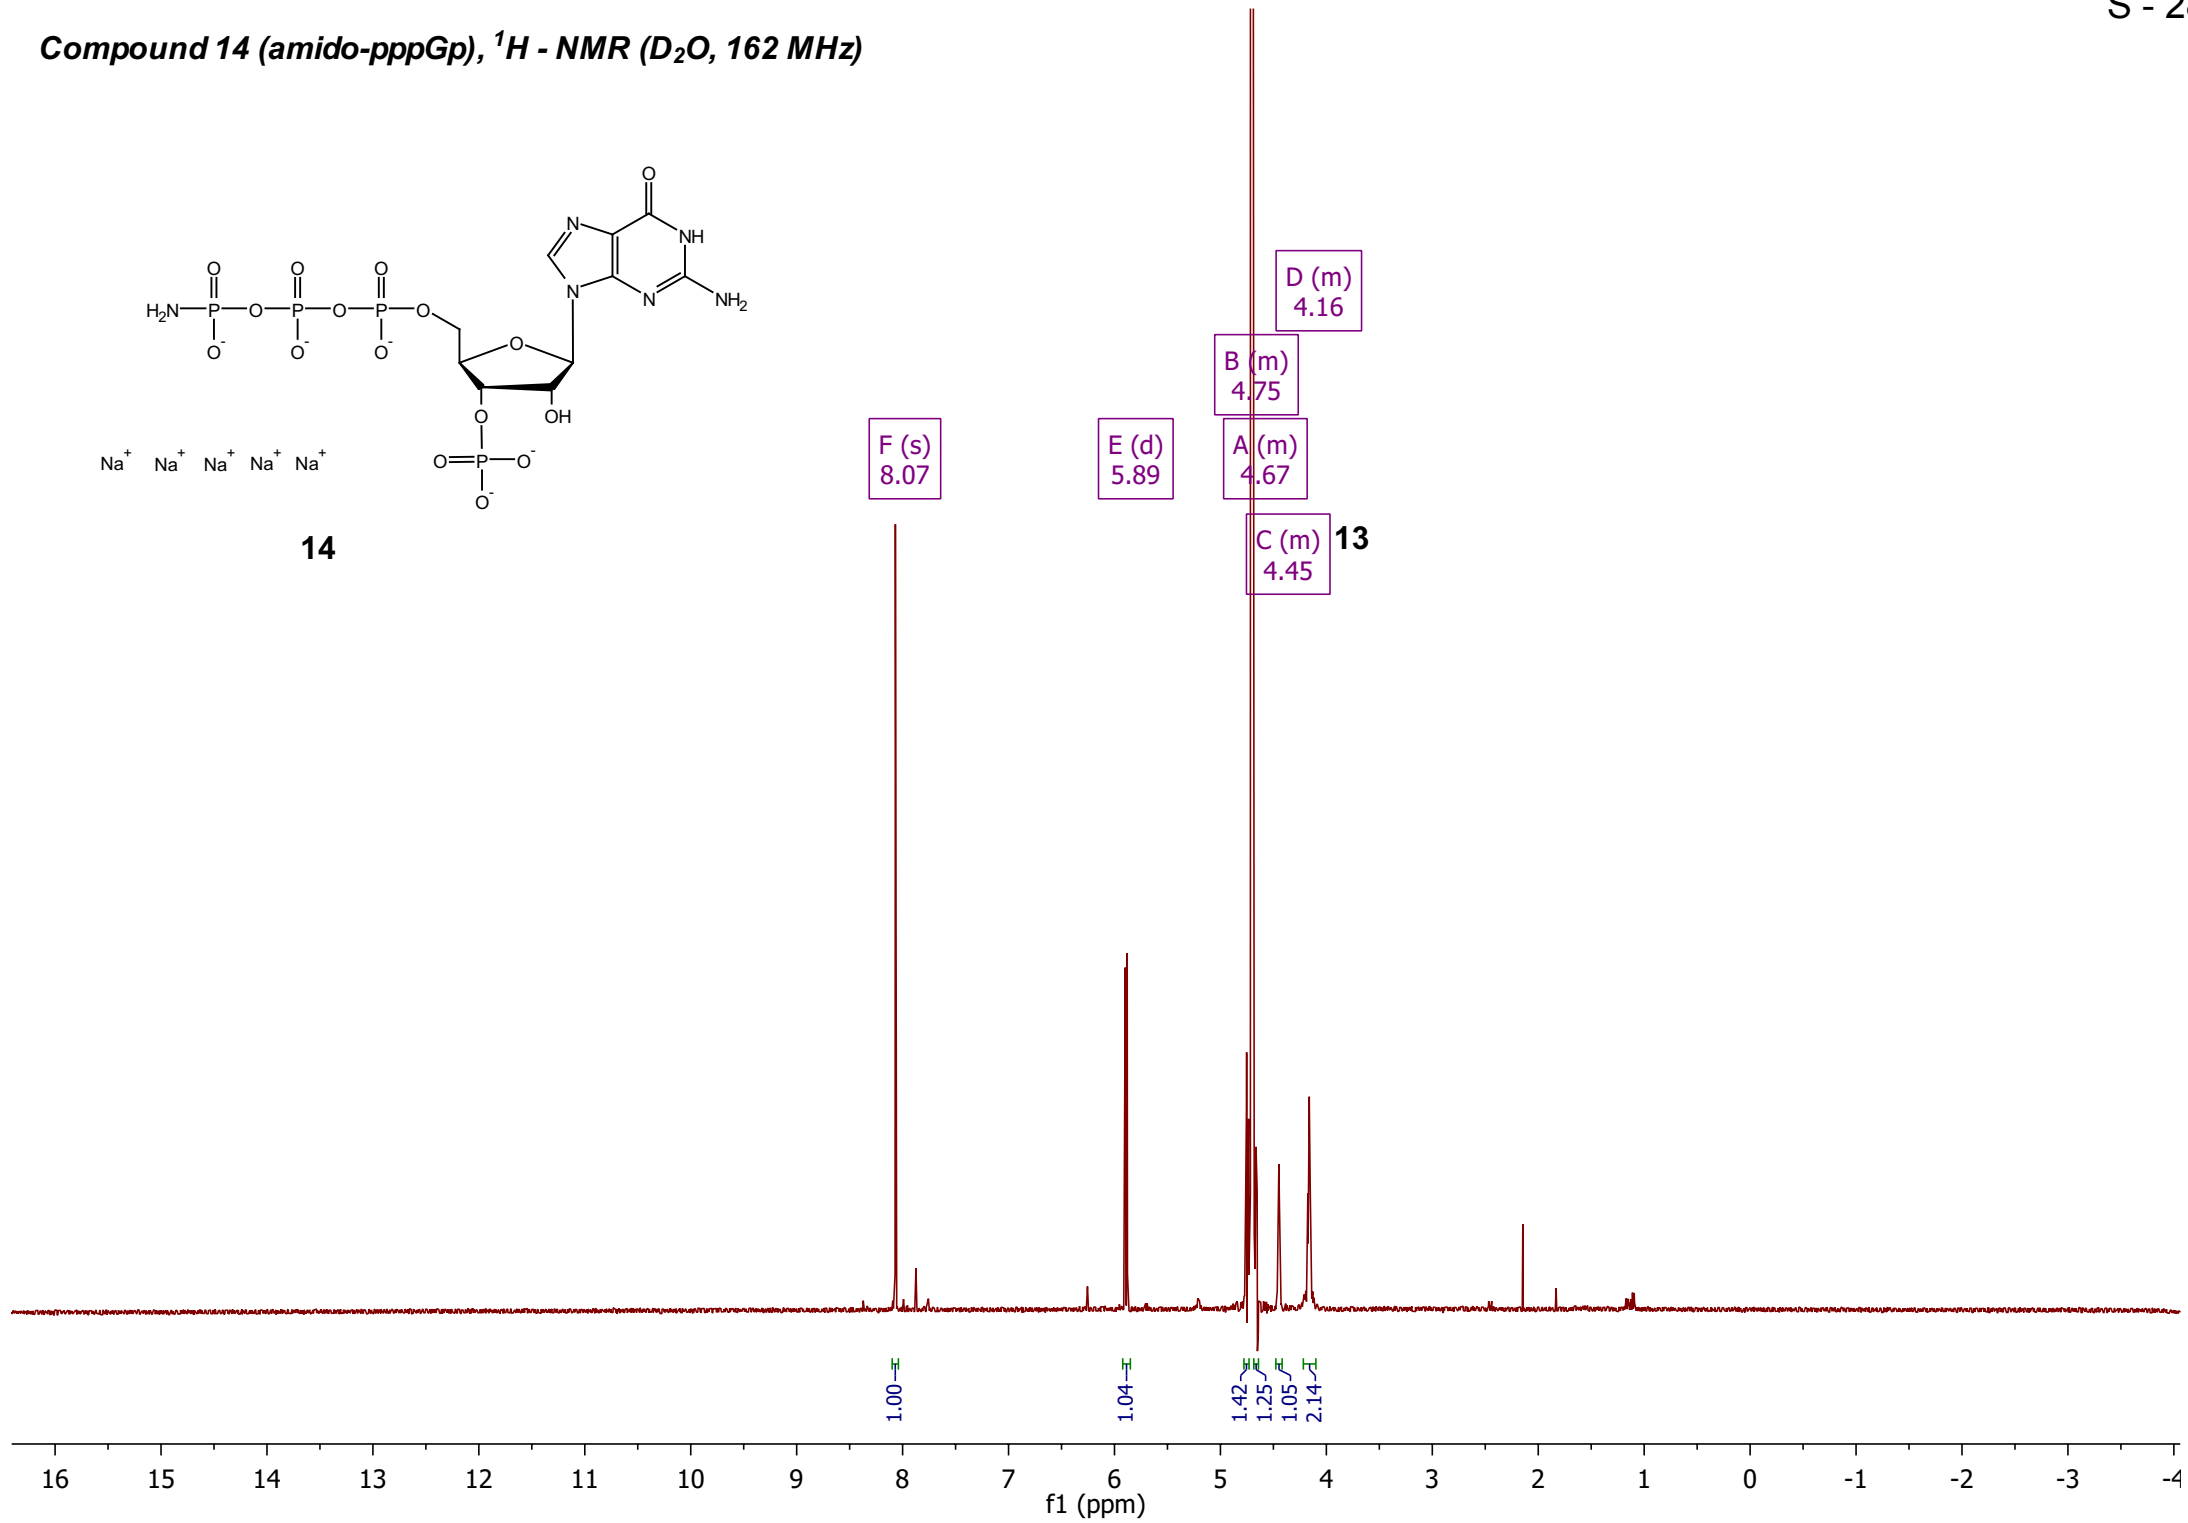

**Compound 14 (amido-pppGp),  $^1\text{H}$   $\{^{31}\text{P}\}$  - NMR ( $\text{D}_2\text{O}$ , 400 MHz)**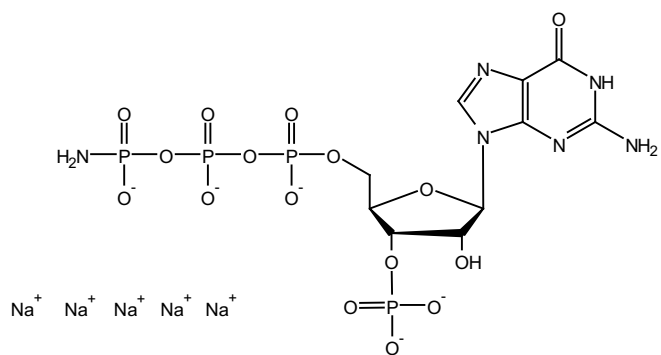**14**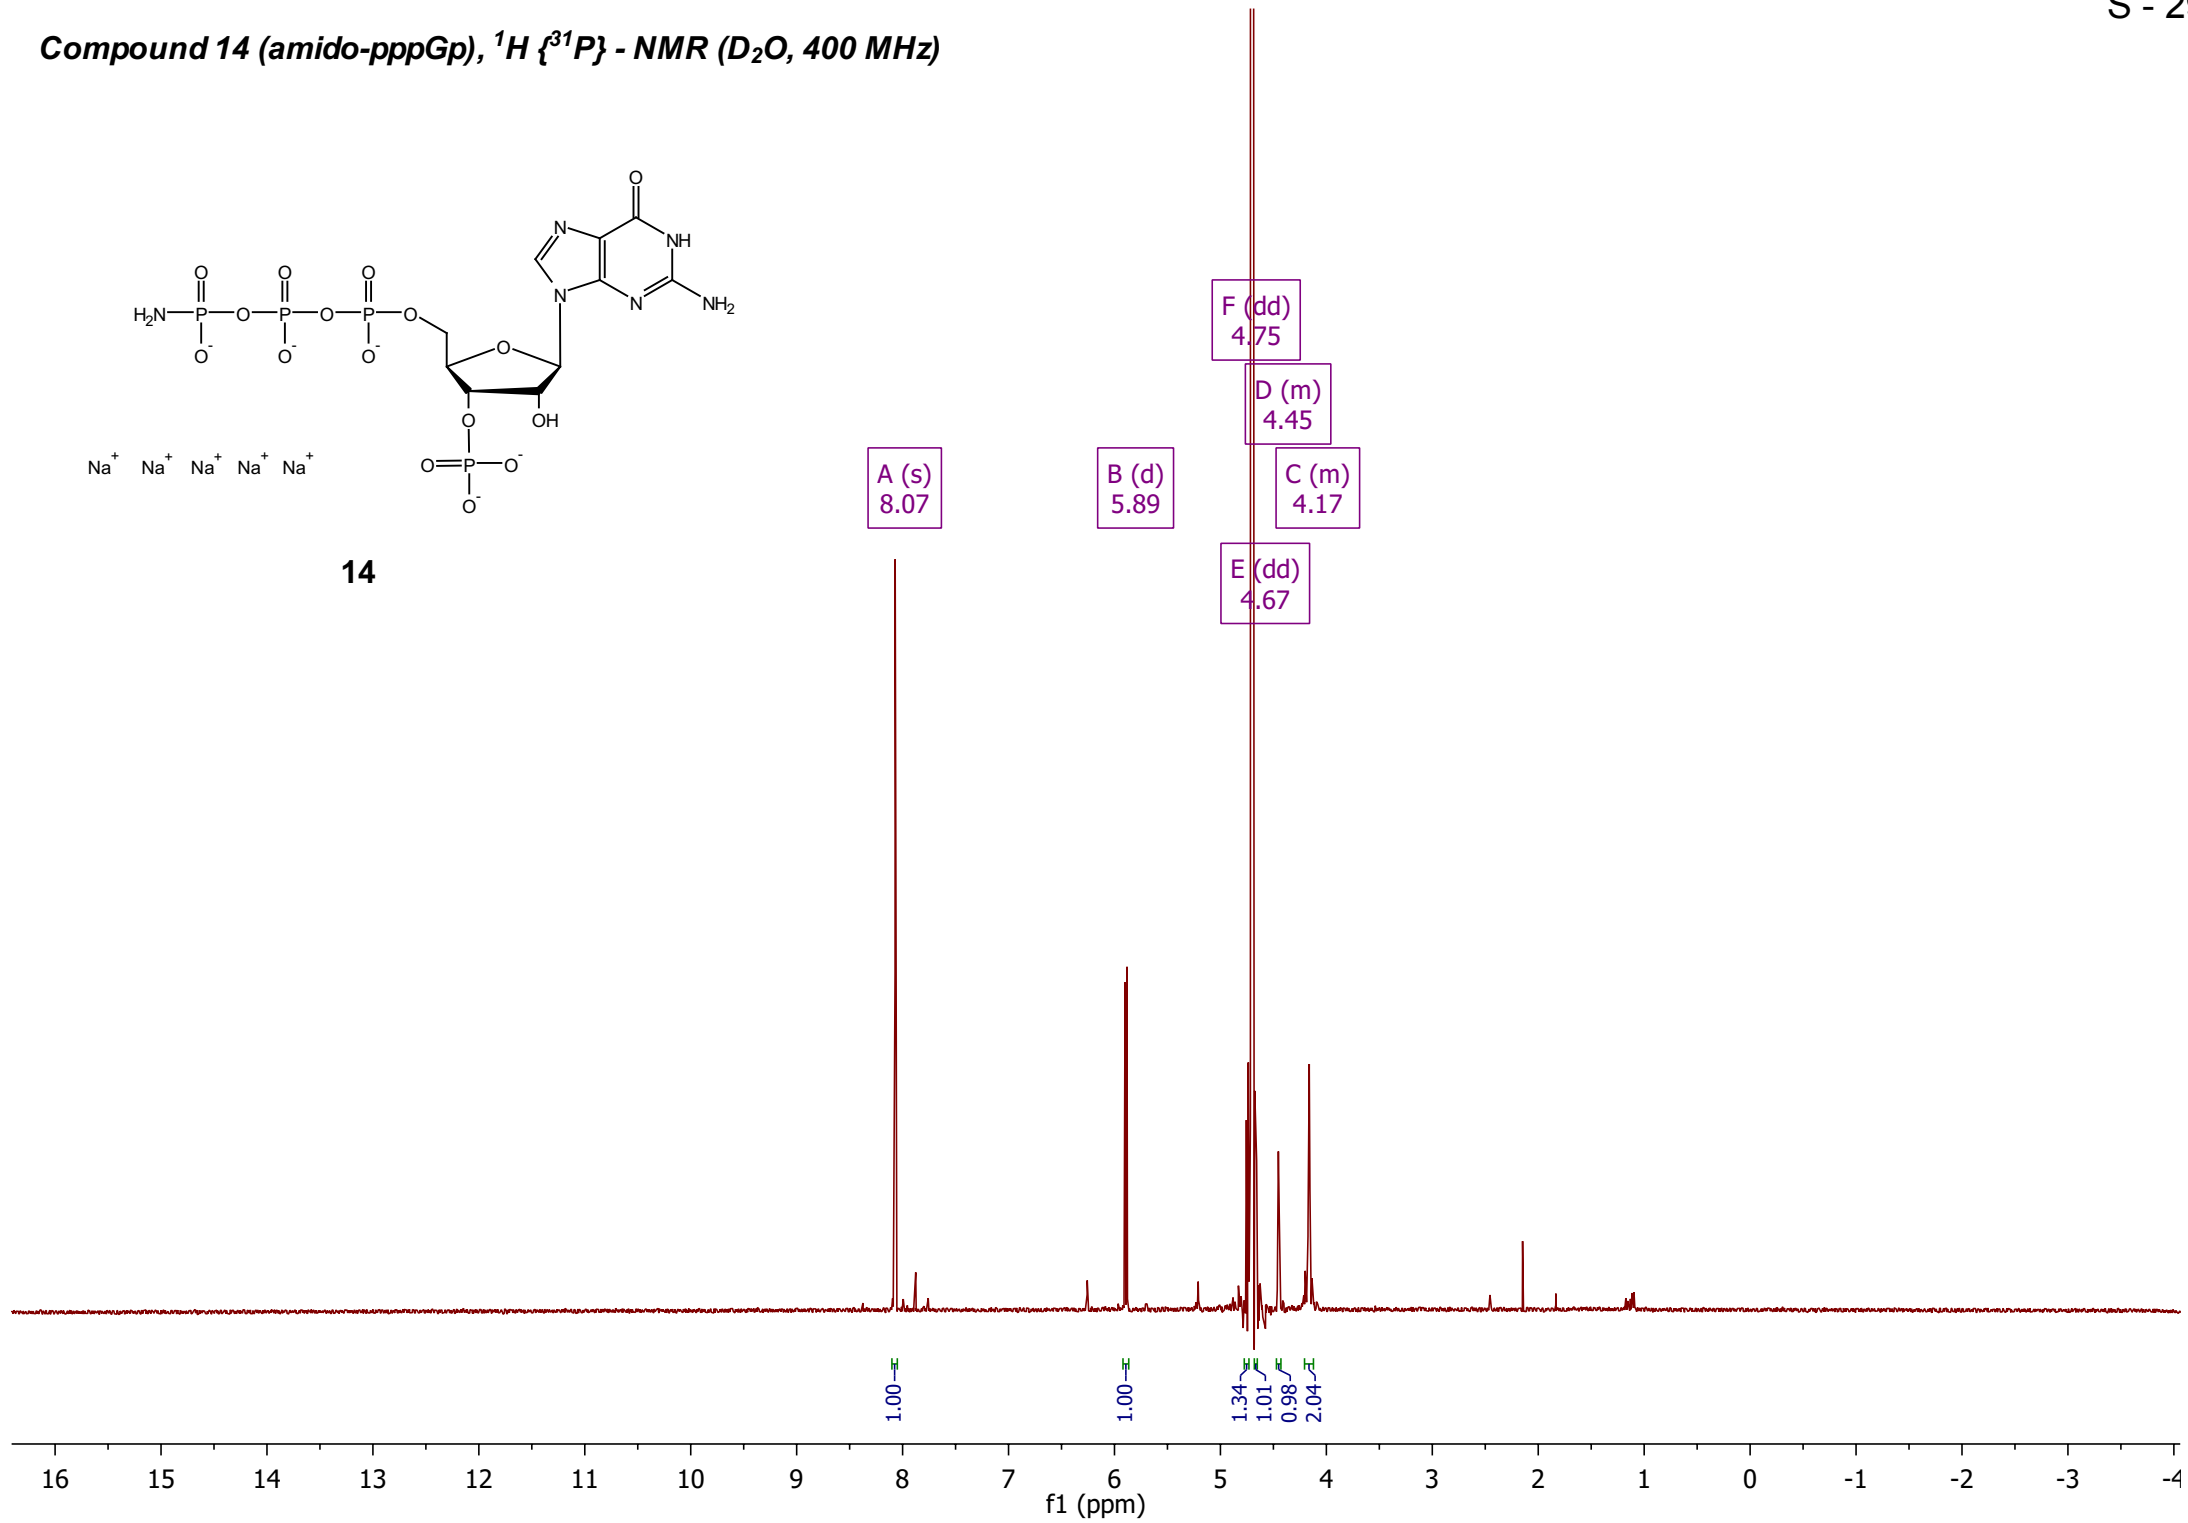

Compound 14 (amido-pppGp),  $^{31}\text{P}$  { $^1\text{H}$ } - NMR ( $\text{D}_2\text{O}$ , 162 MHz)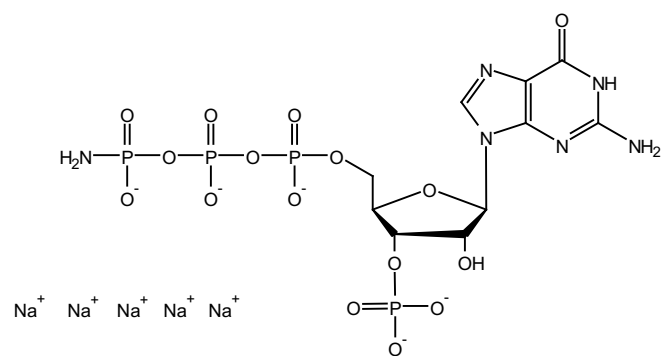

14

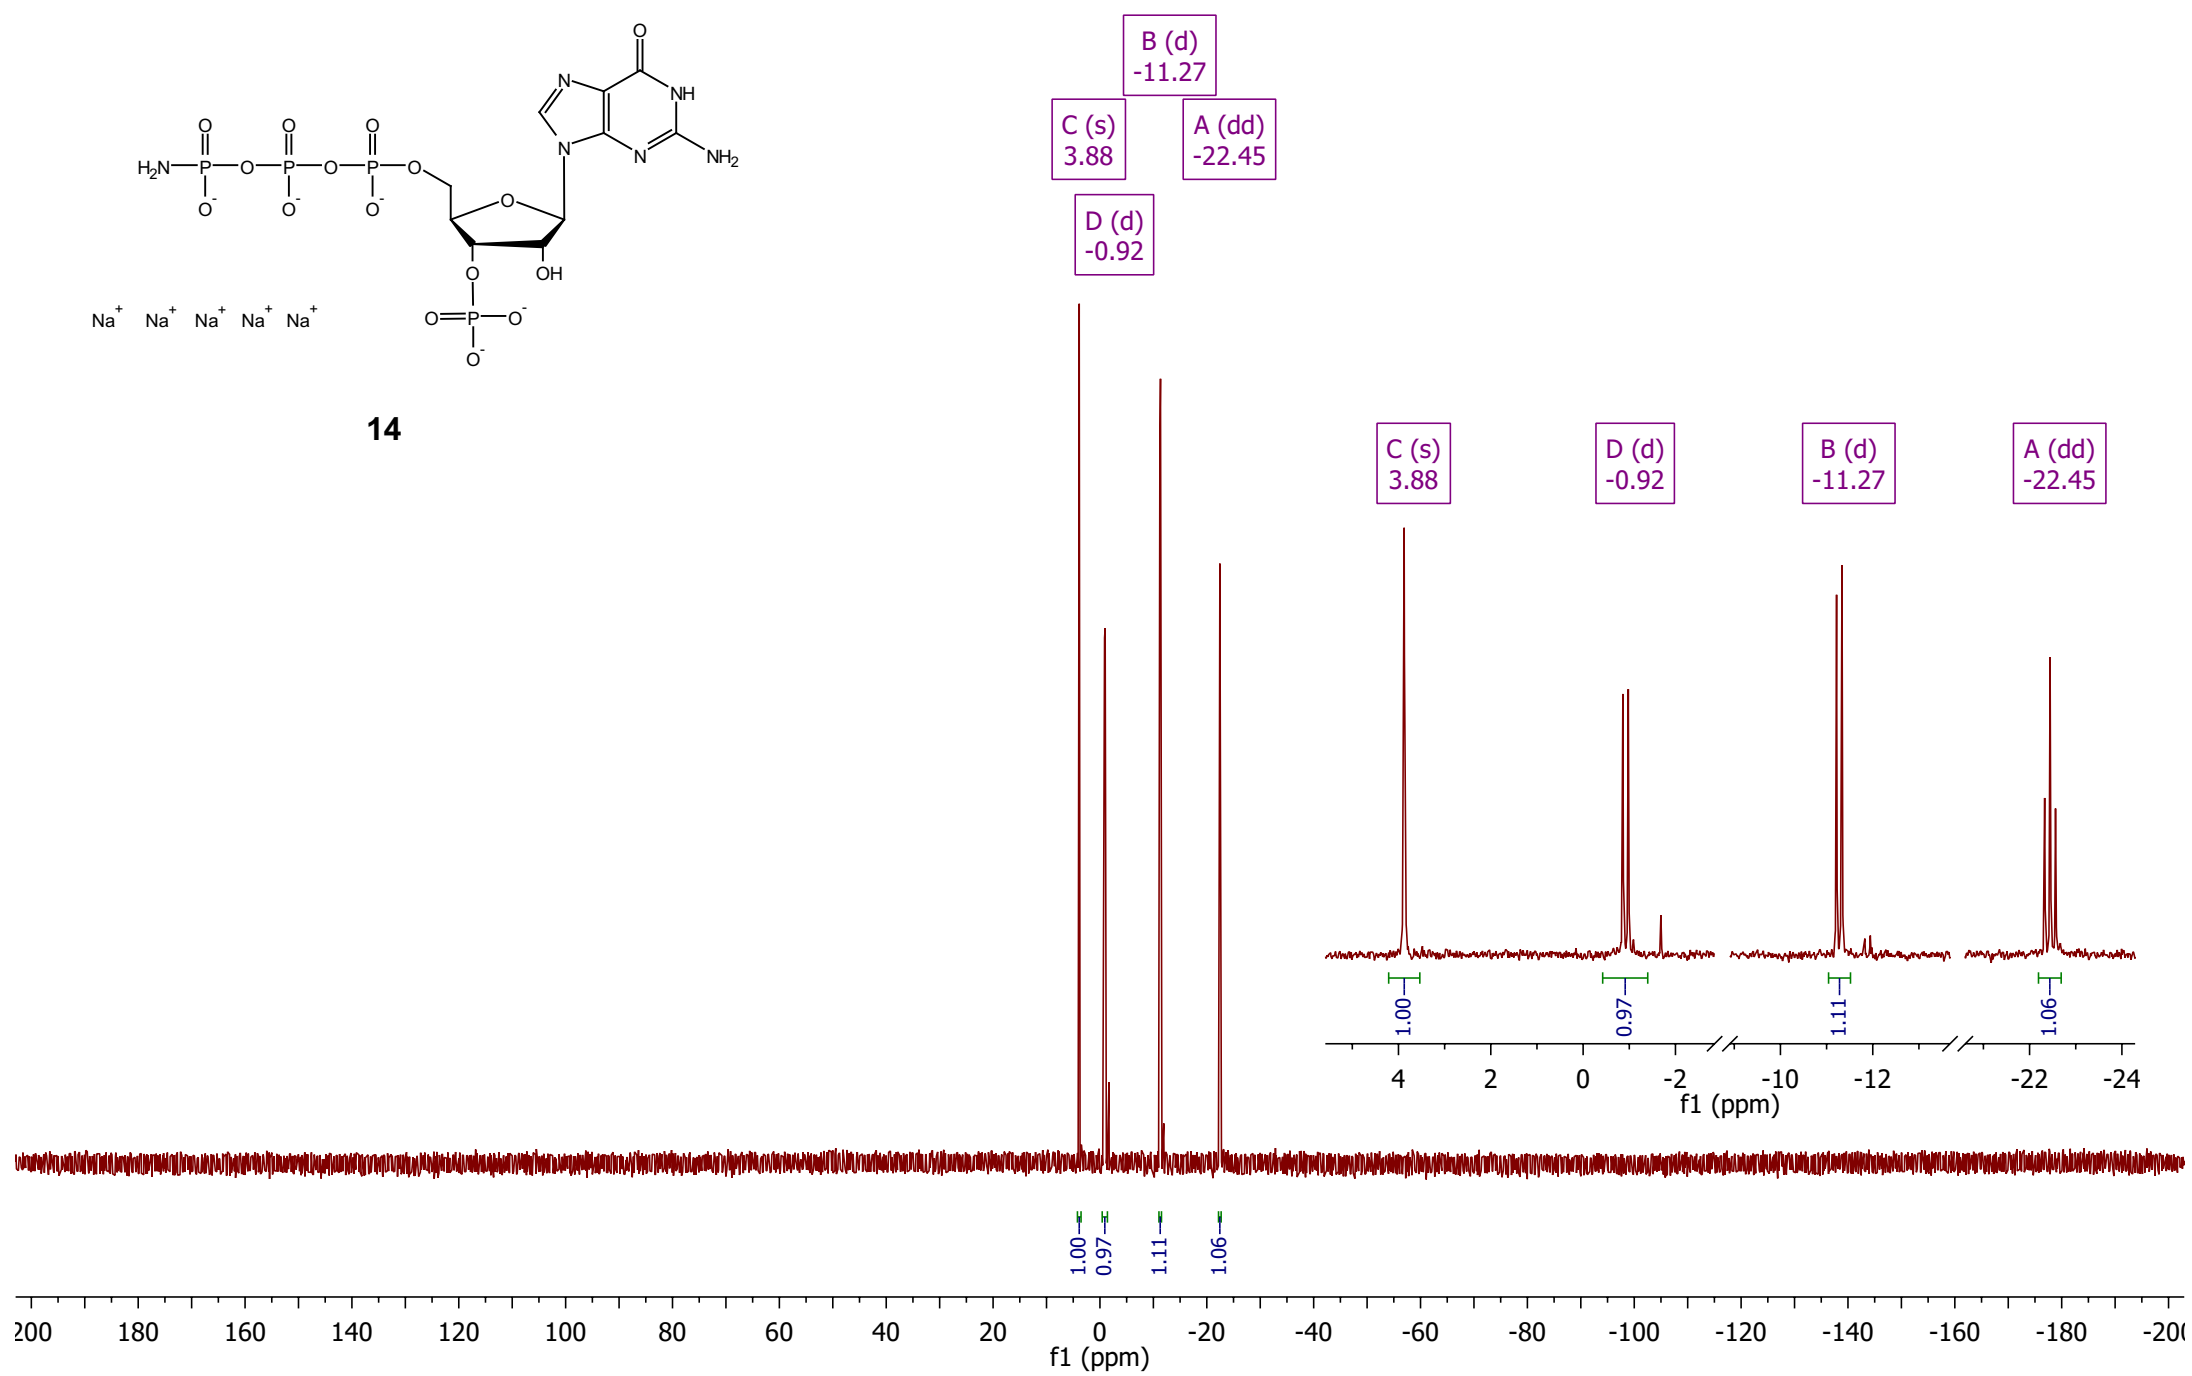

Compound 14 (amido-pppGp), DQF - COSY (D<sub>2</sub>O)

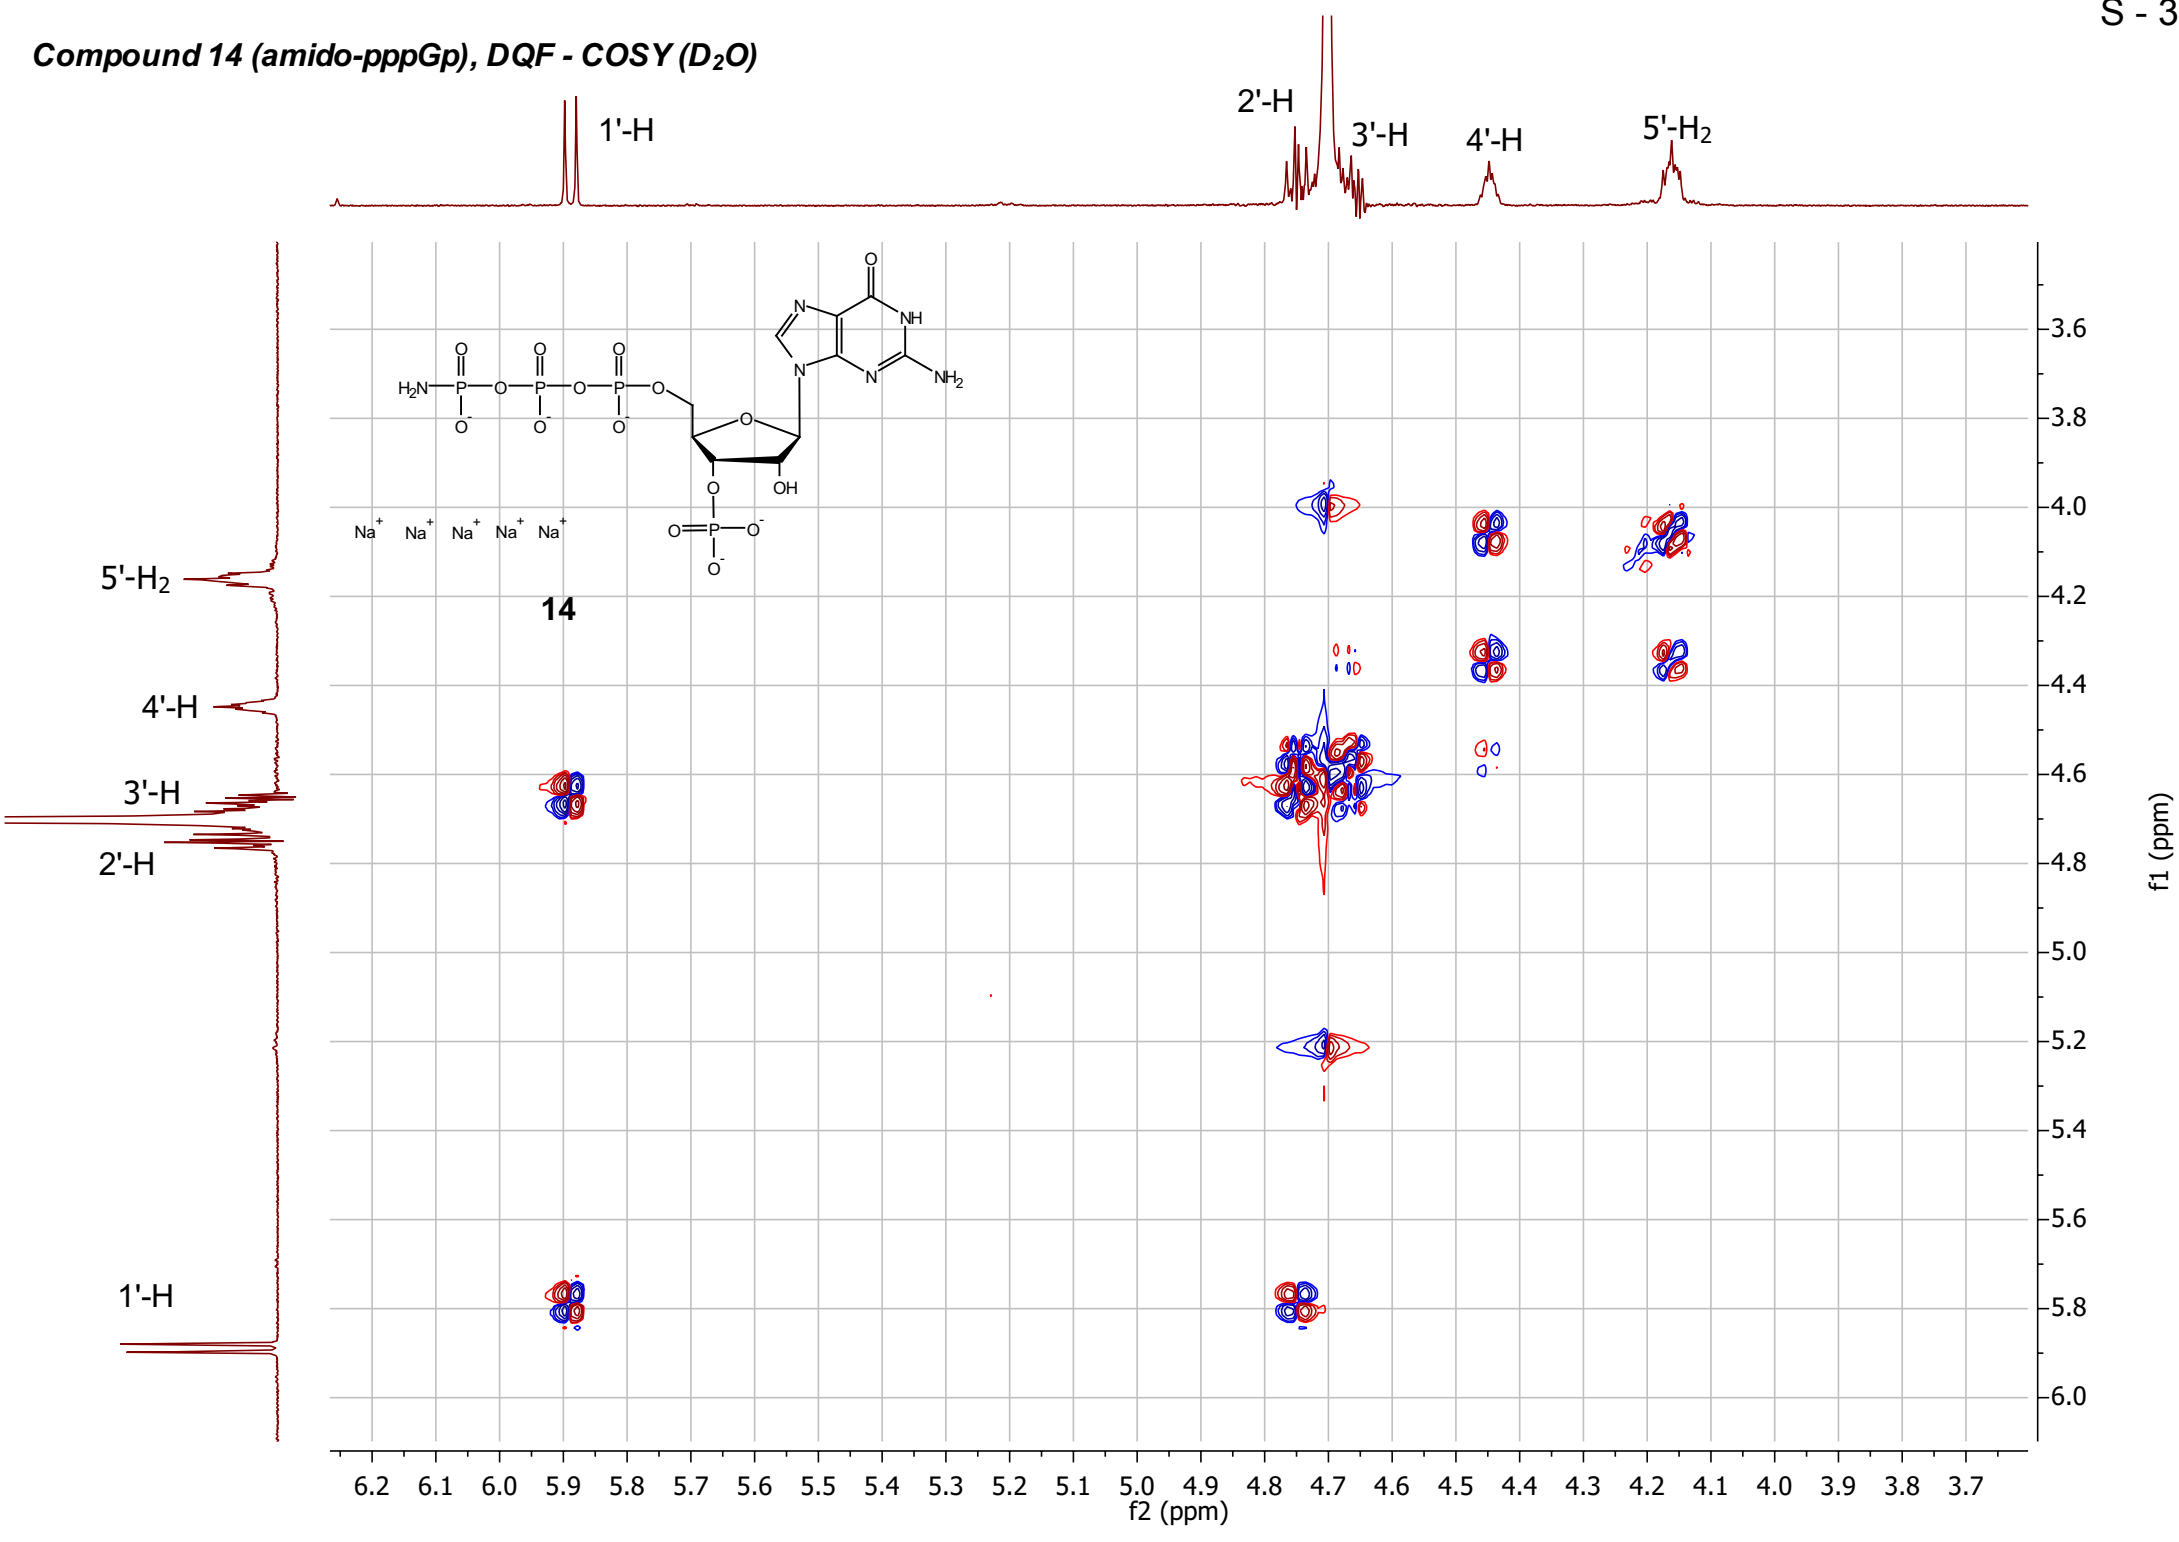



Compound 14 (amido-pppGp), HSQC (D<sub>2</sub>O)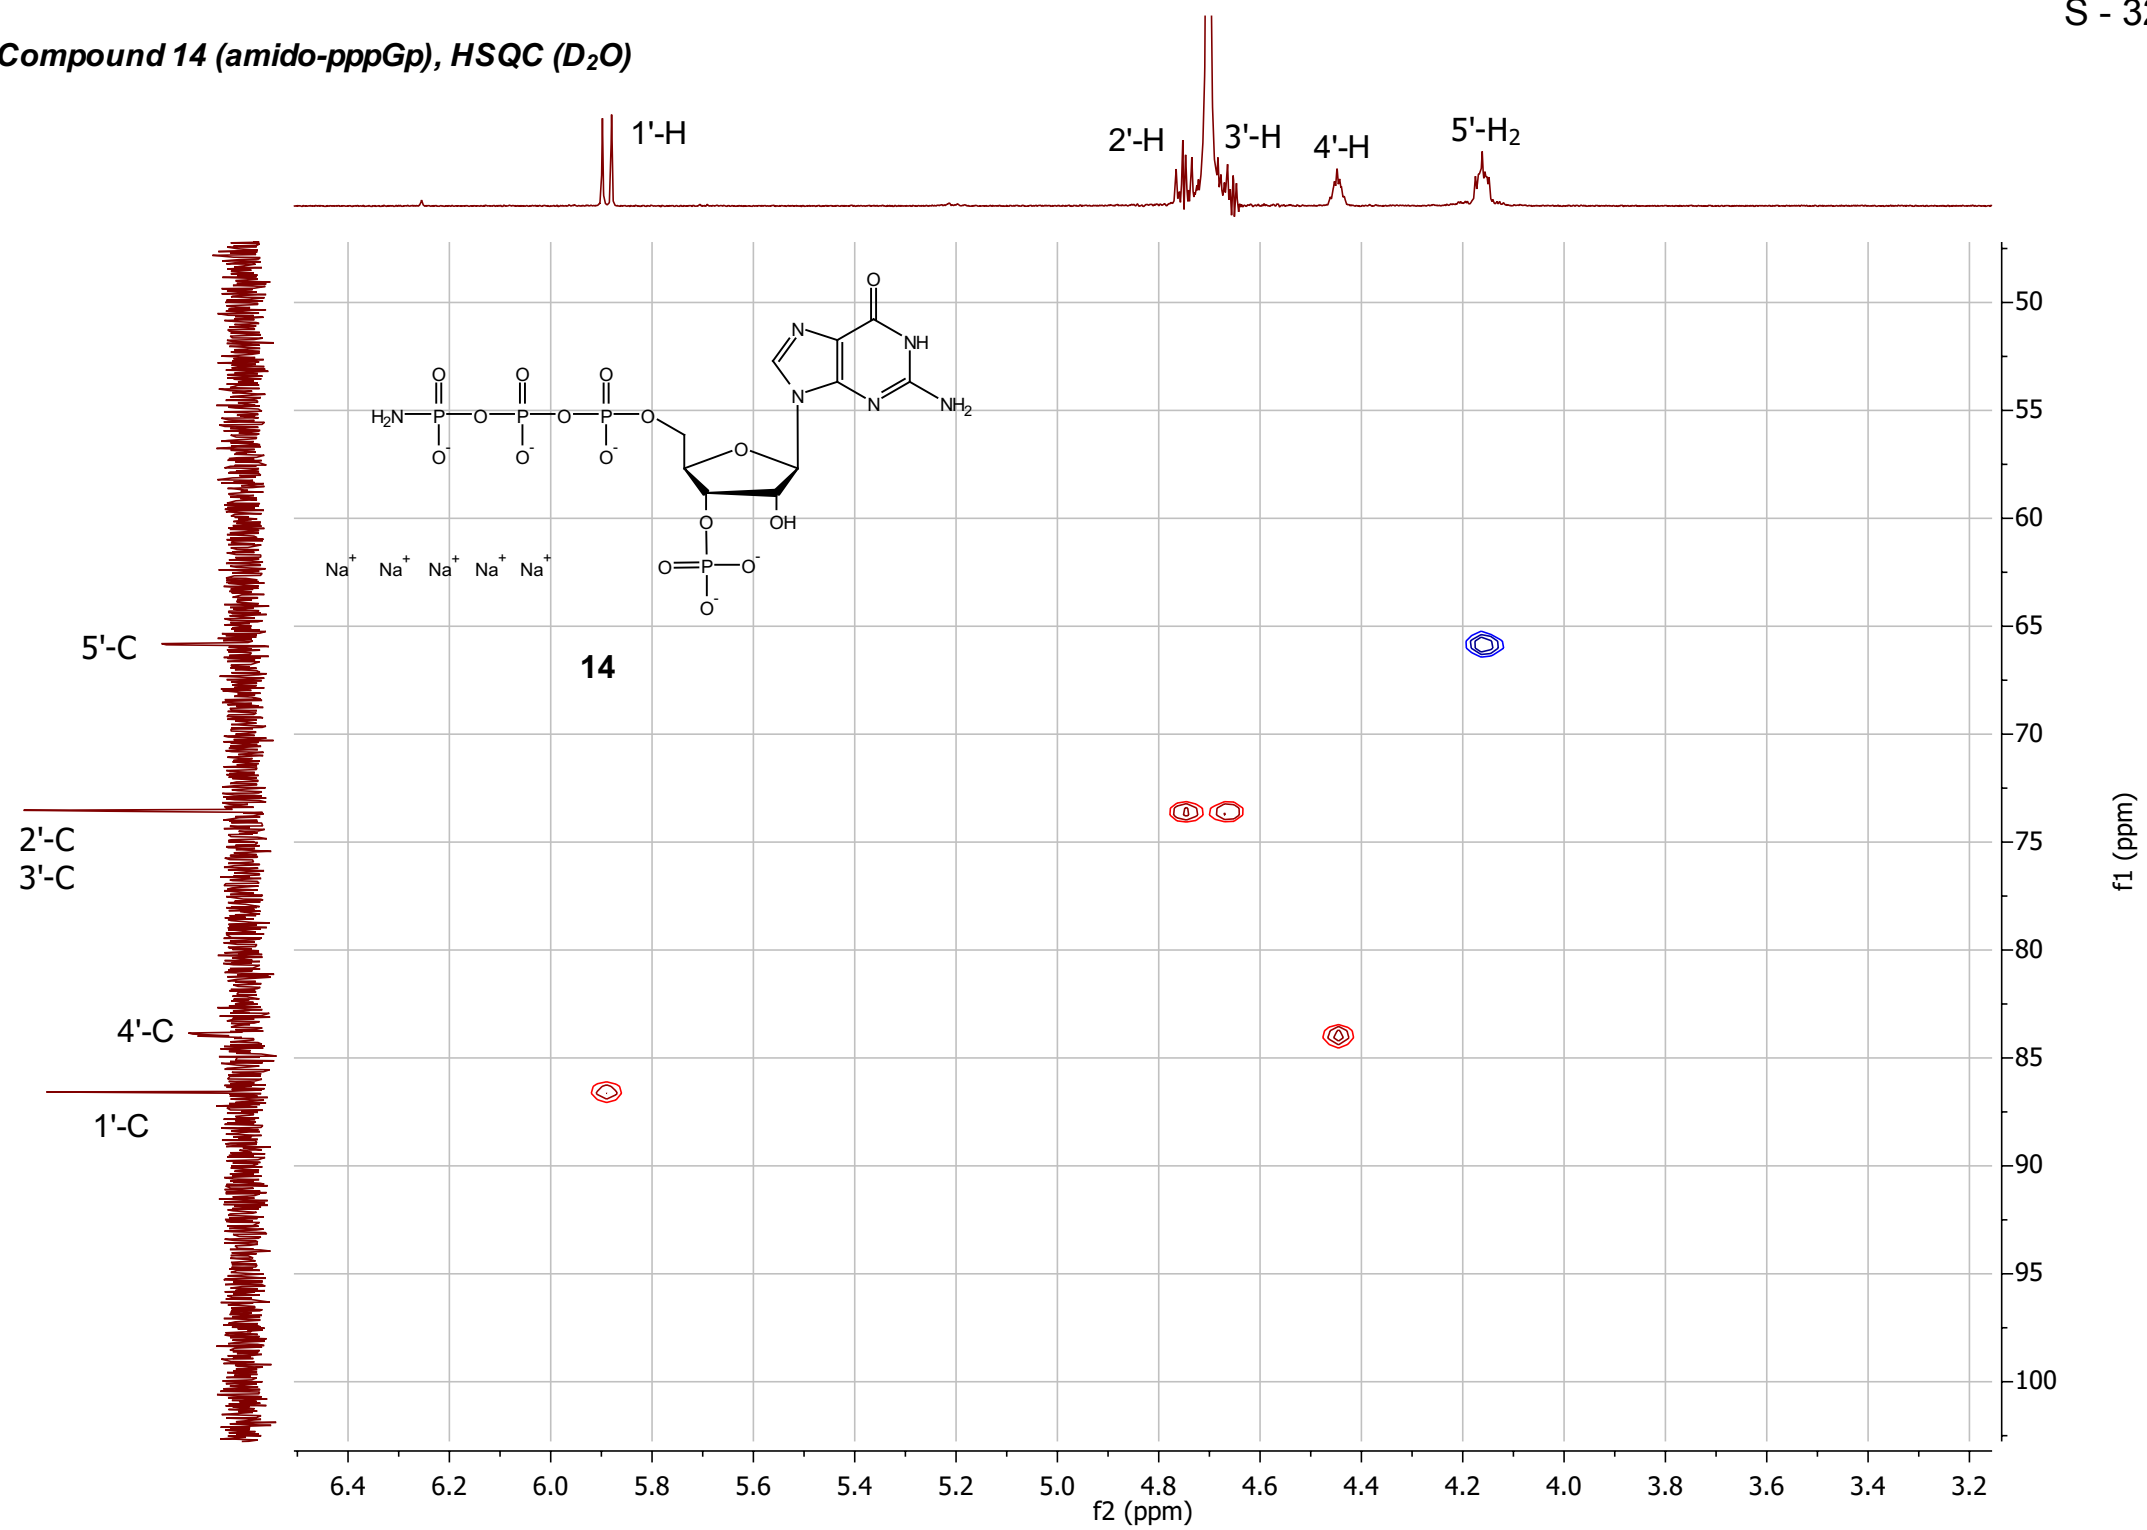

Compound 14 (amido-pppGp),  $^1\text{H} - ^{31}\text{P} - \text{HMBC} (\text{D}_2\text{O})$ 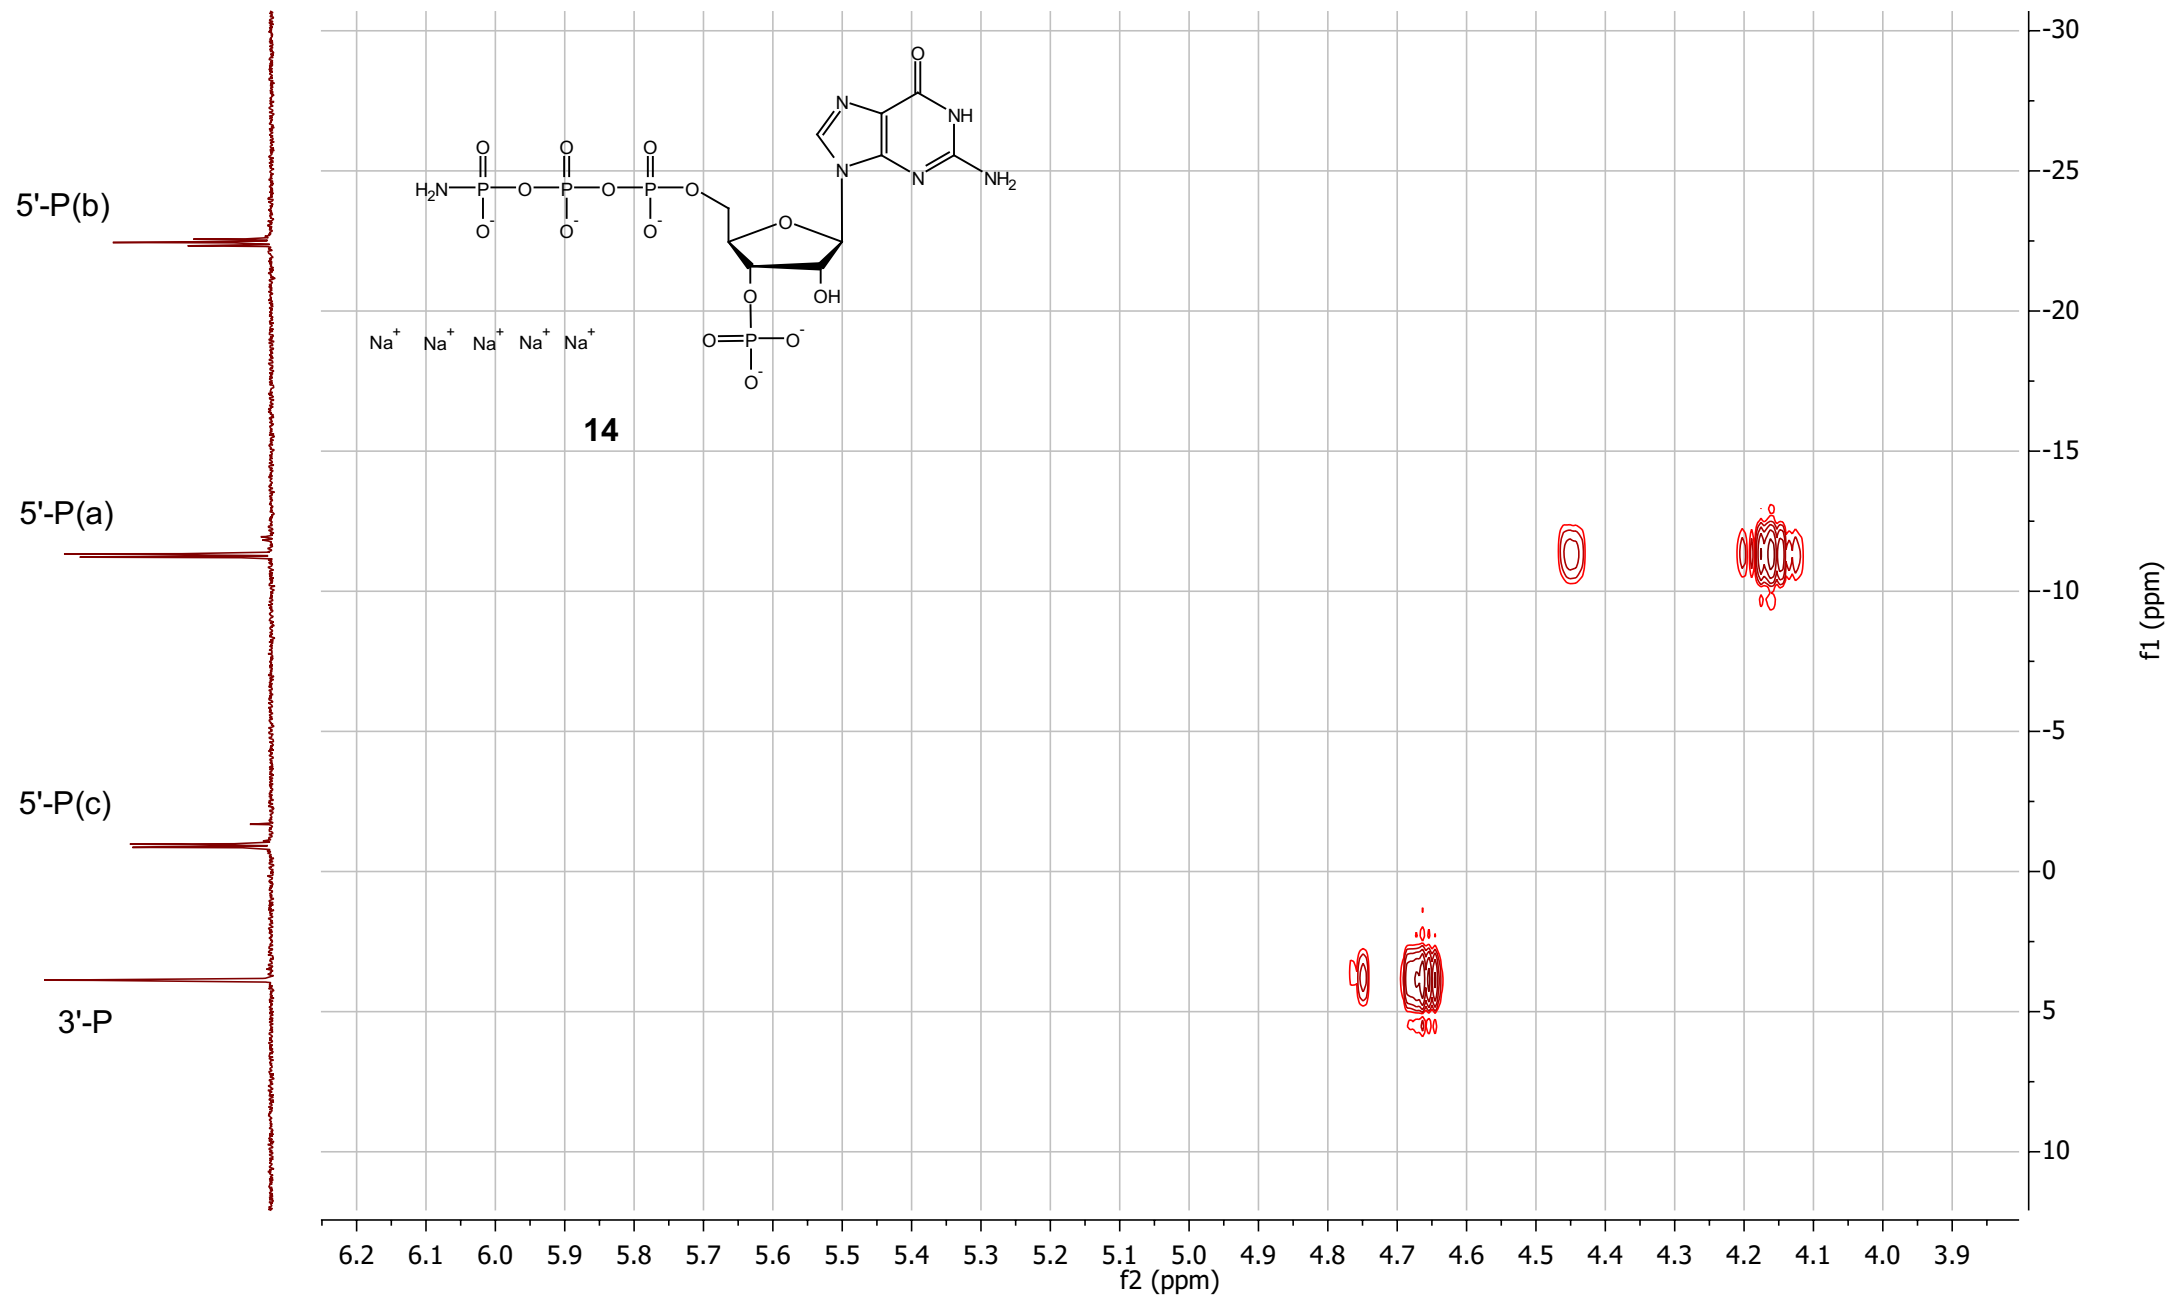

Compound 14 (amido-pppGp),  $^{13}\text{C}$   $\{^1\text{H}\}$  ( $\text{D}_2\text{O}$ , 162 MHz)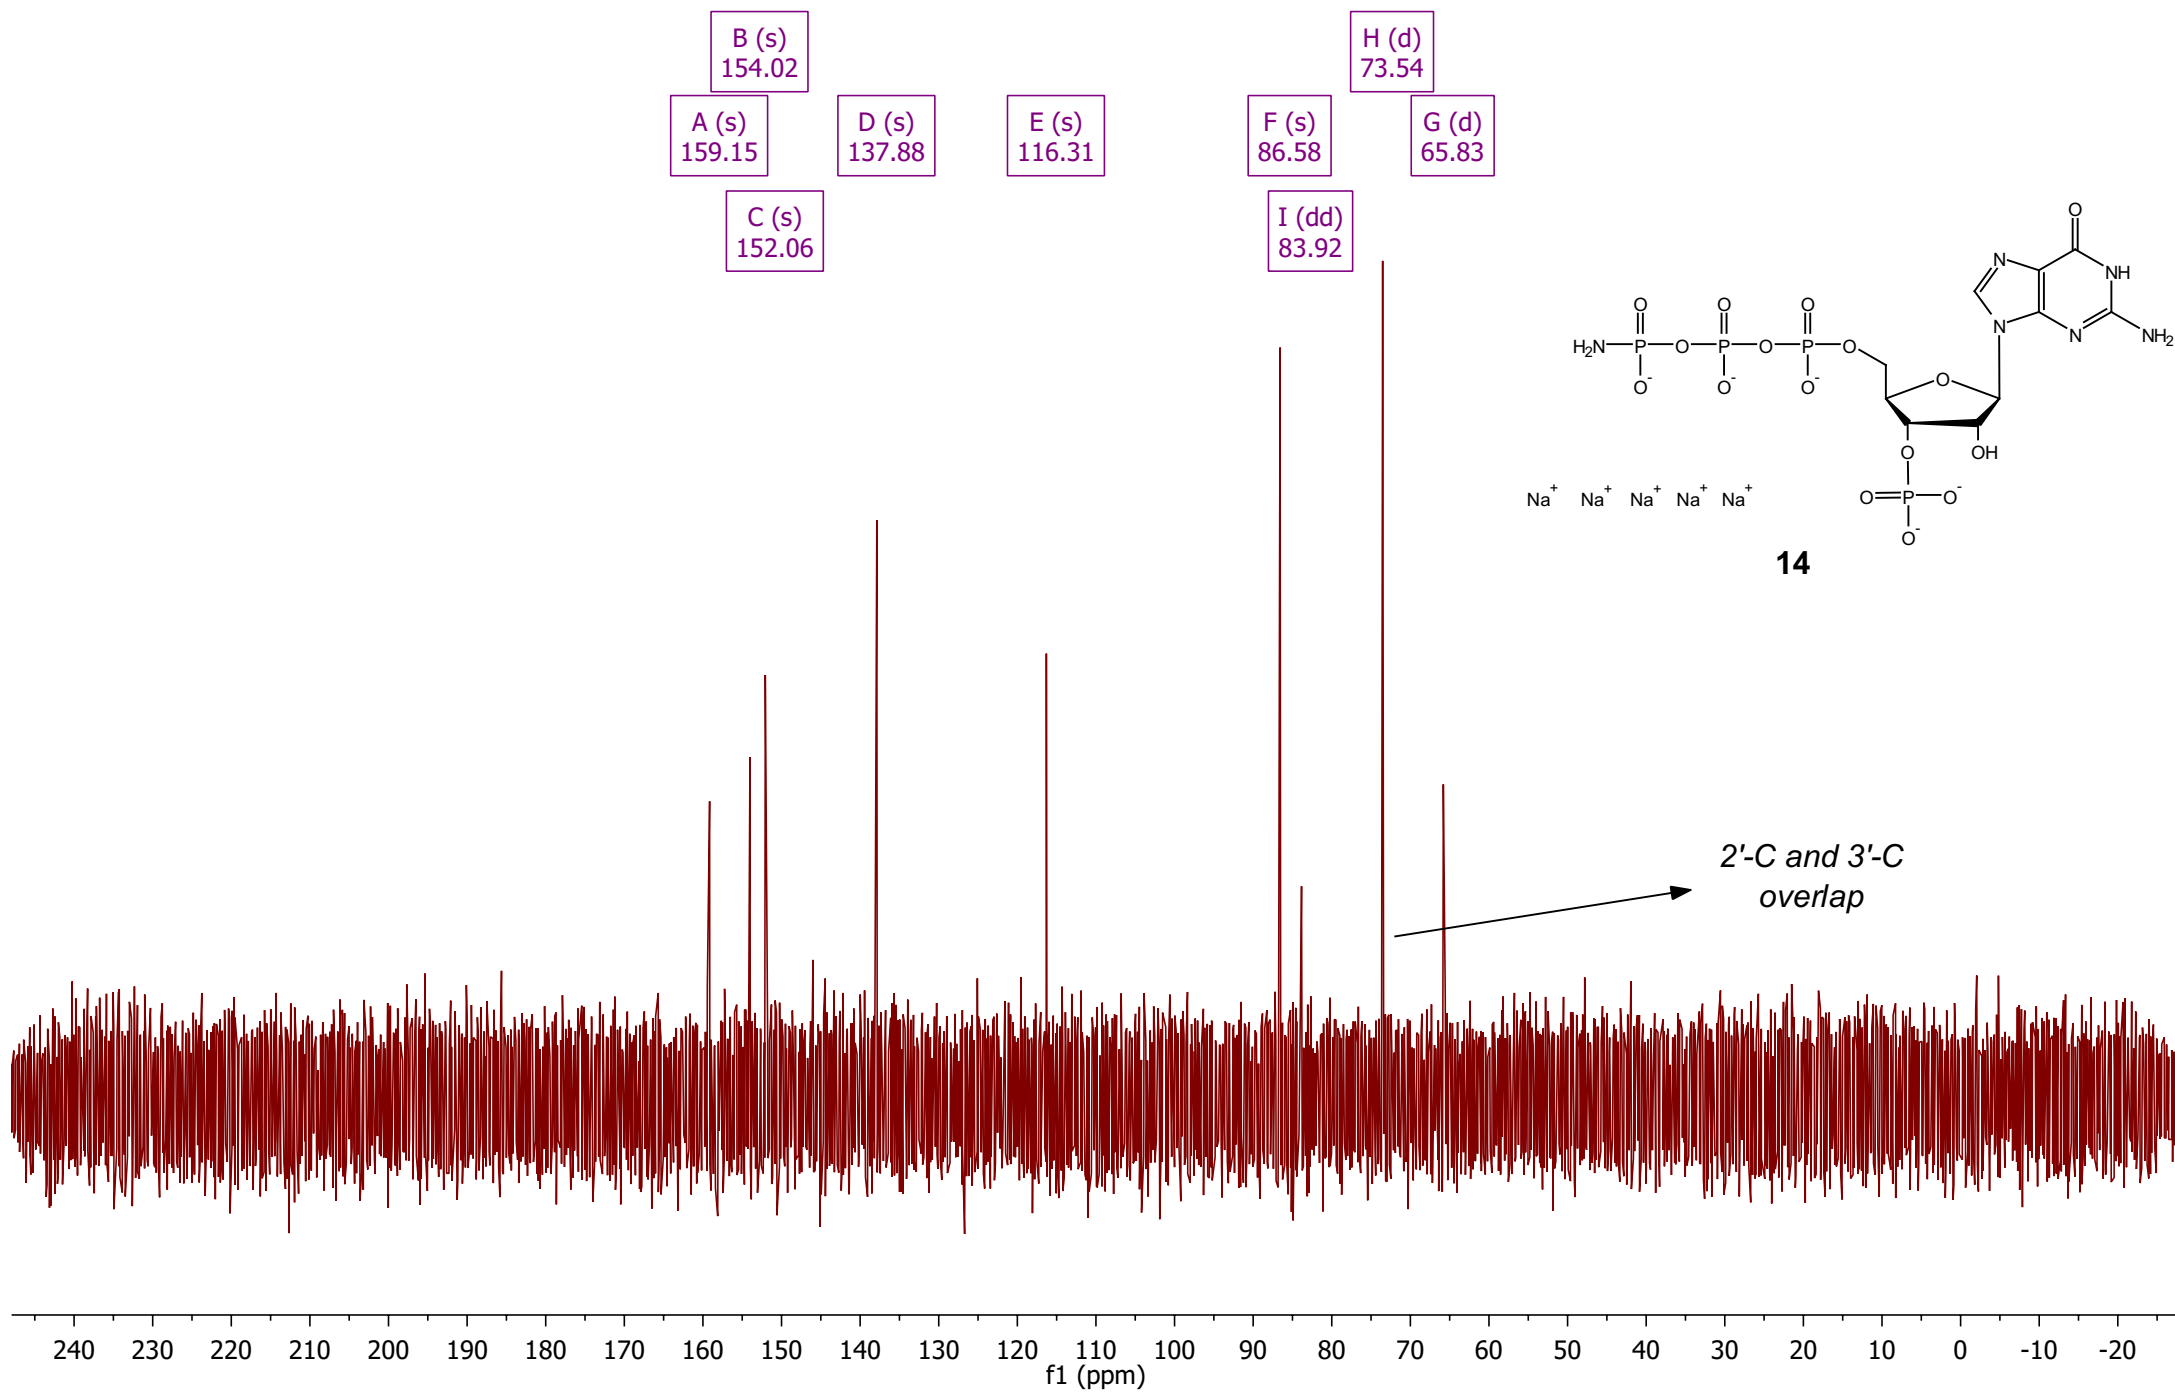

**Compound 15 (diethylamido-pppAp), <sup>1</sup>H - NMR (D<sub>2</sub>O, 400 MHz)**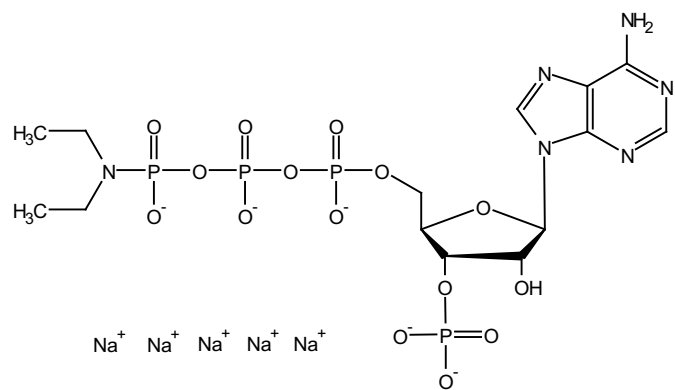Na<sup>+</sup> Na<sup>+</sup> Na<sup>+</sup> Na<sup>+</sup> Na<sup>+</sup>**15**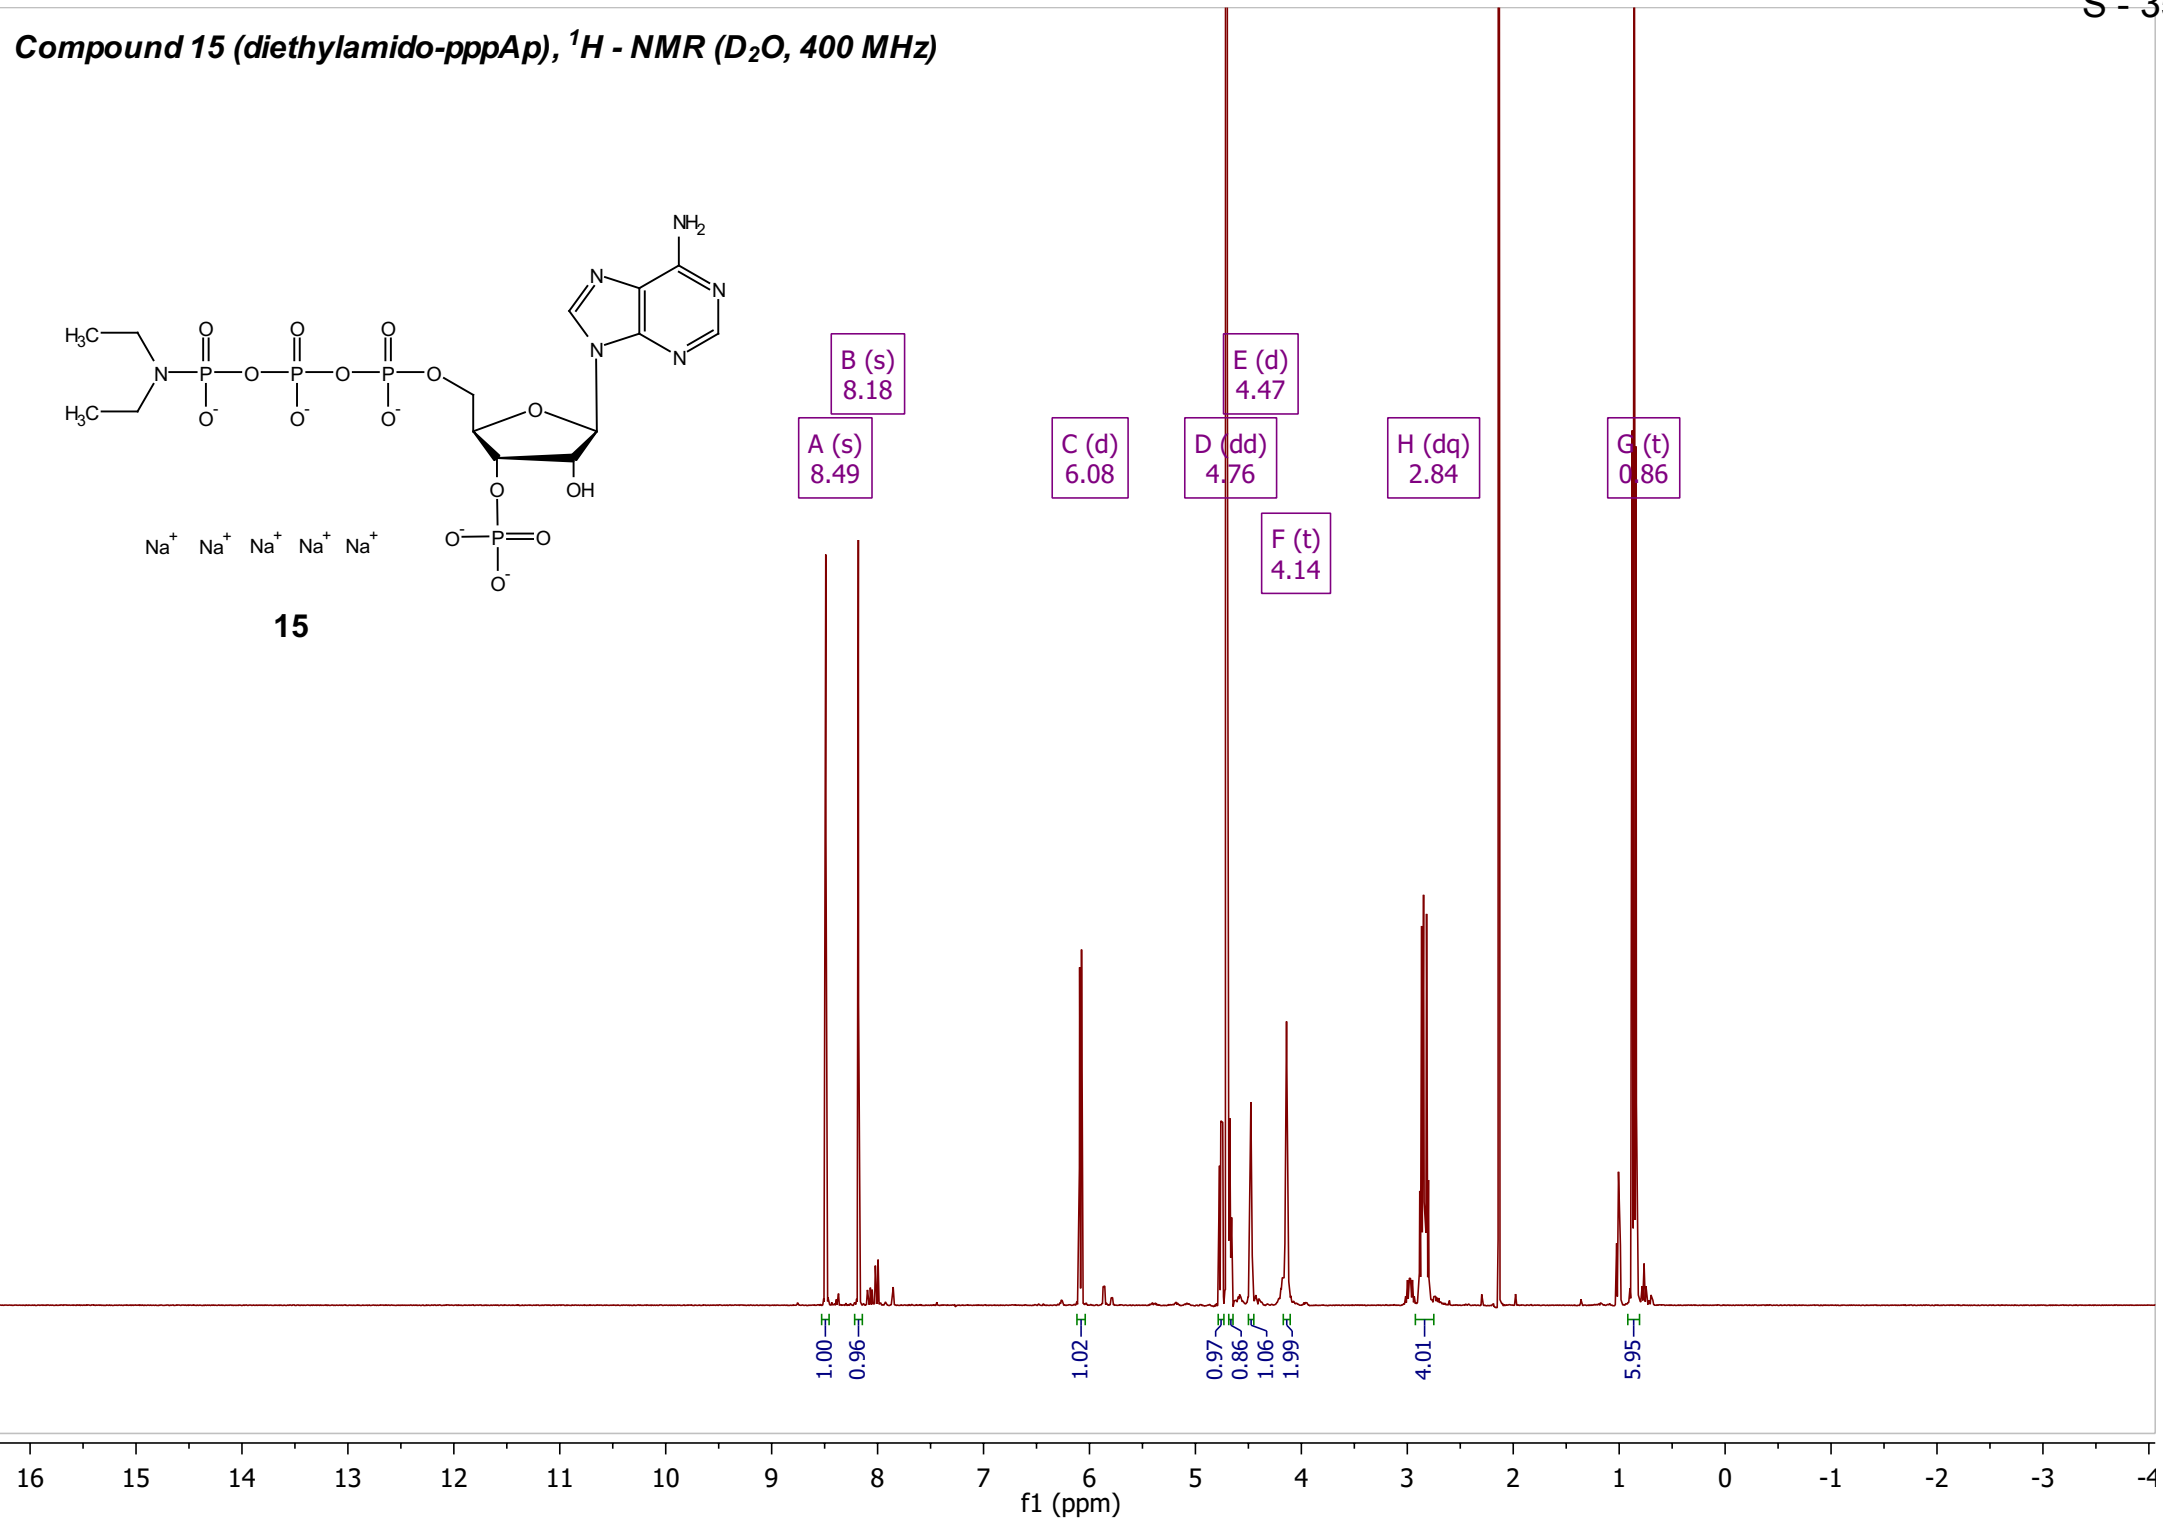

Compound 15 (diethylamido-pppAp),  $^1\text{H}$   $\{^{31}\text{P}\}$  - NMR ( $\text{D}_2\text{O}$ , 400 MHz)

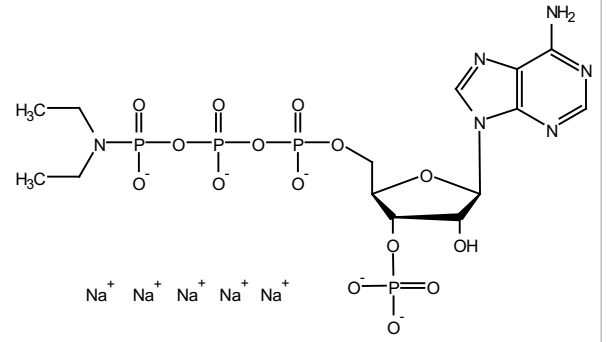

15

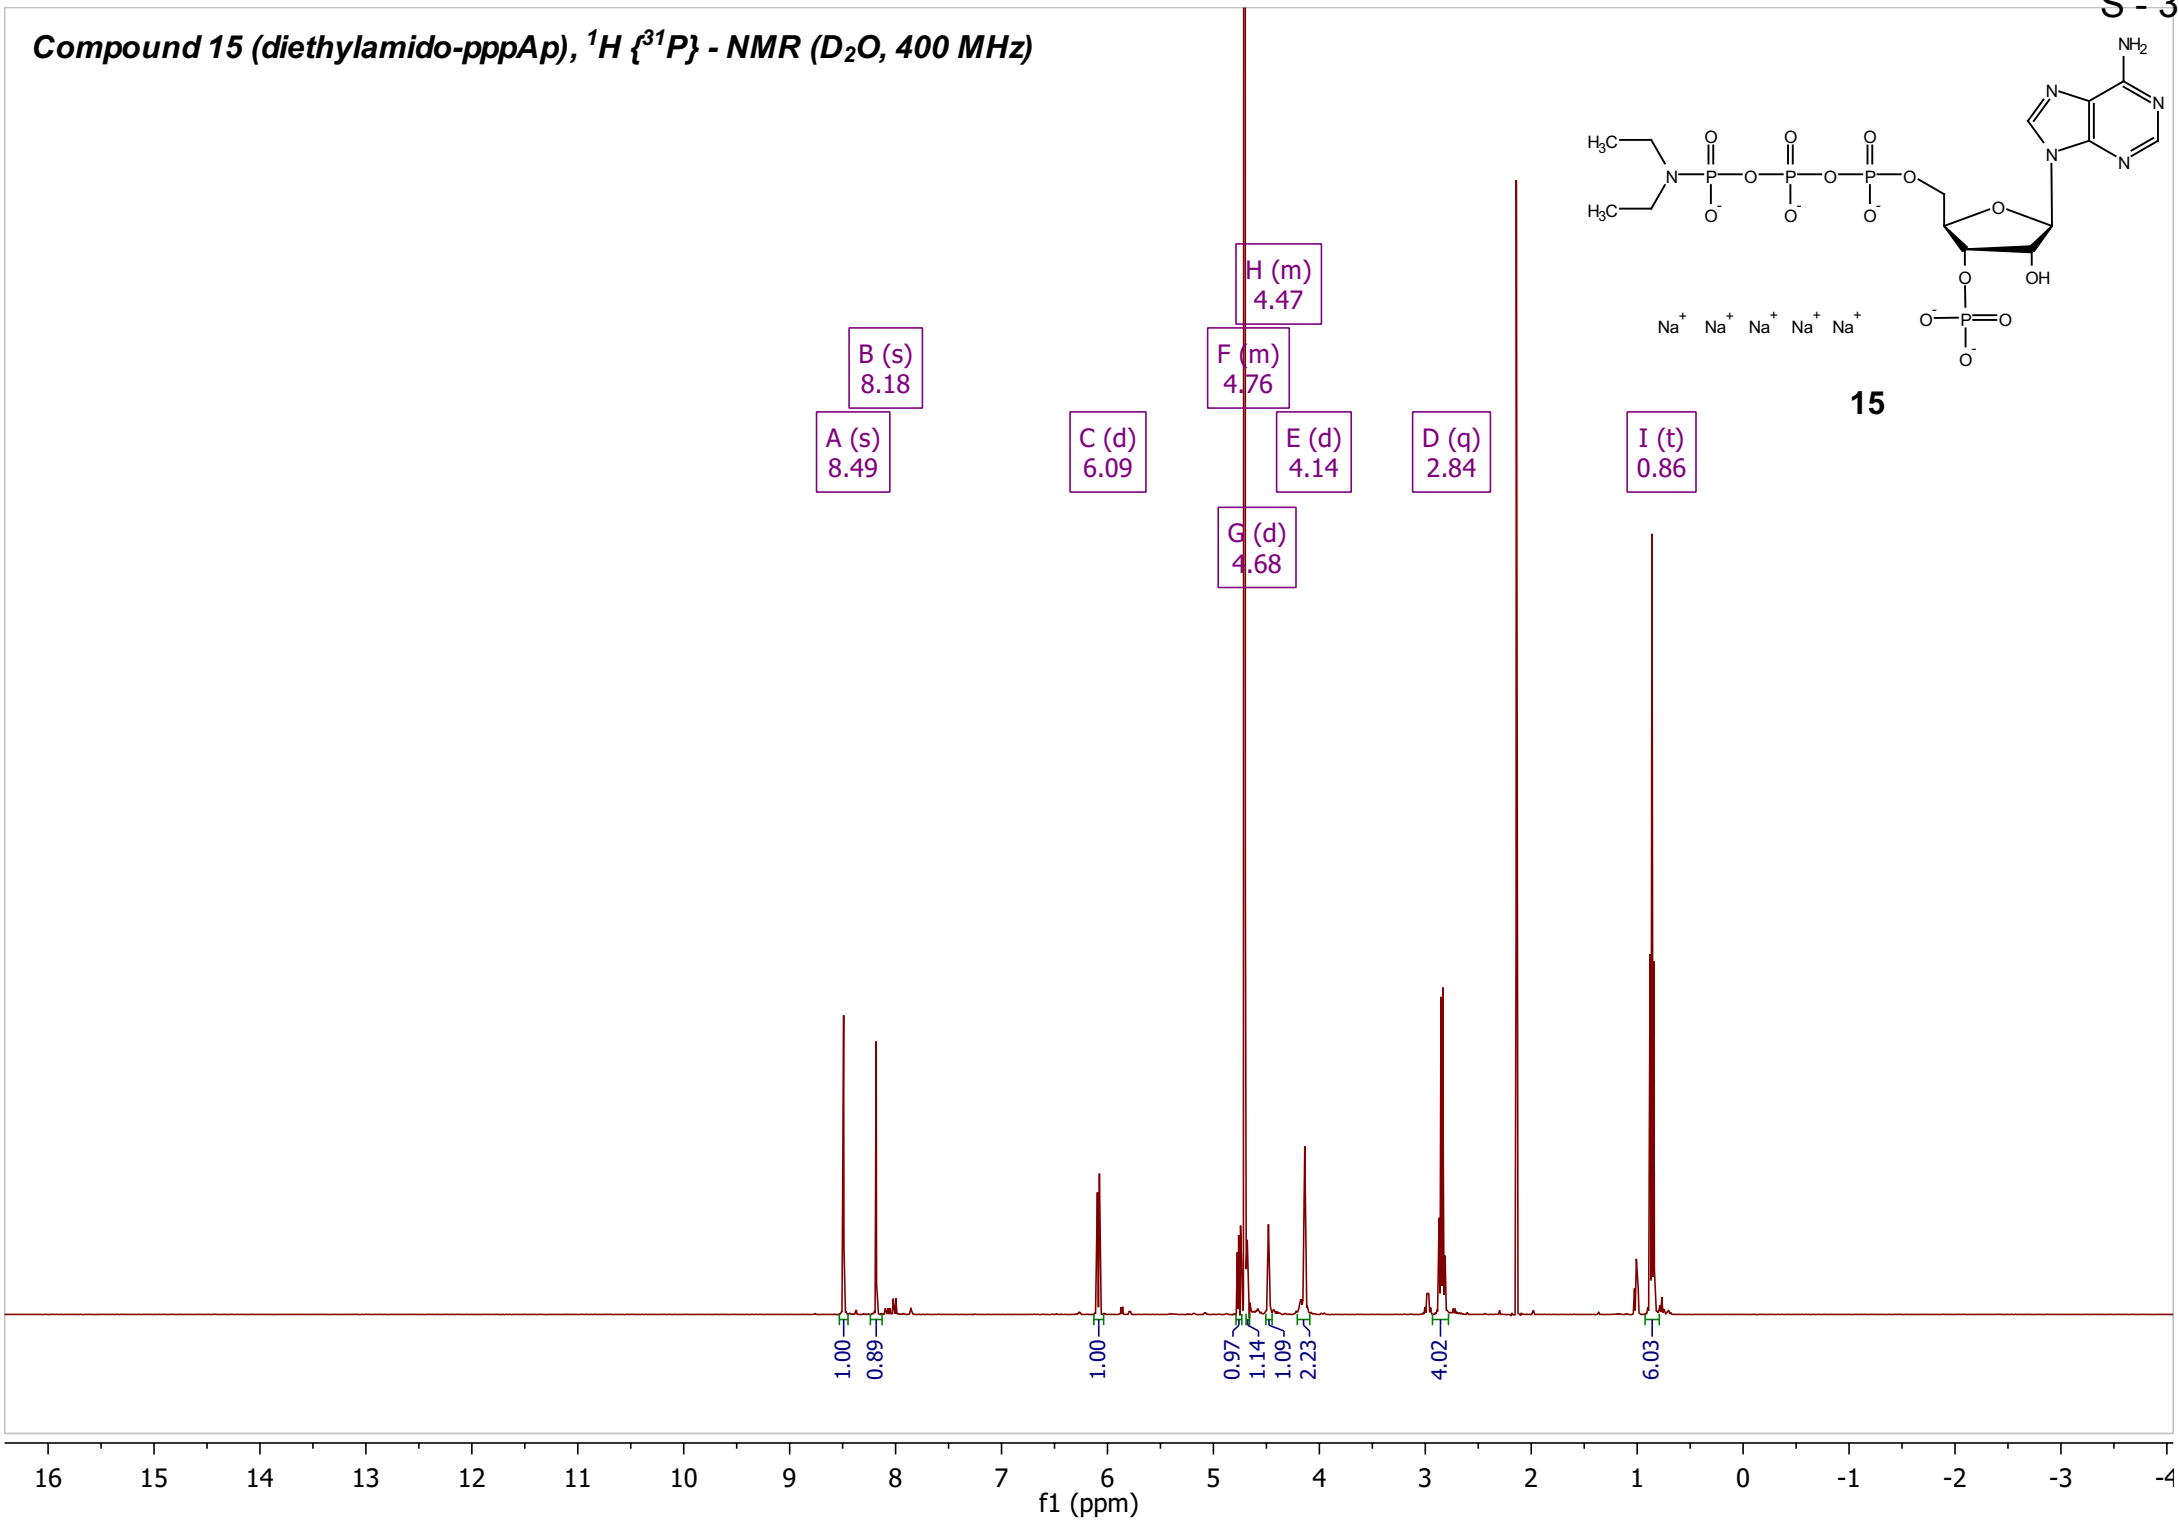

Compound 15 (diethylamido-pppAp),  $^{31}\text{P}$   $\{^1\text{H}\}$  - NMR ( $\text{D}_2\text{O}$ , 162 MHz)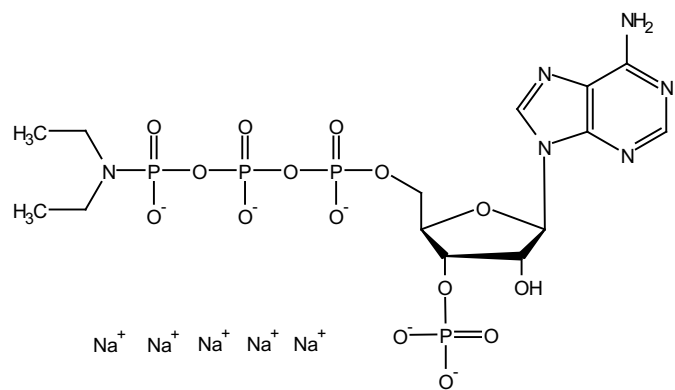**15**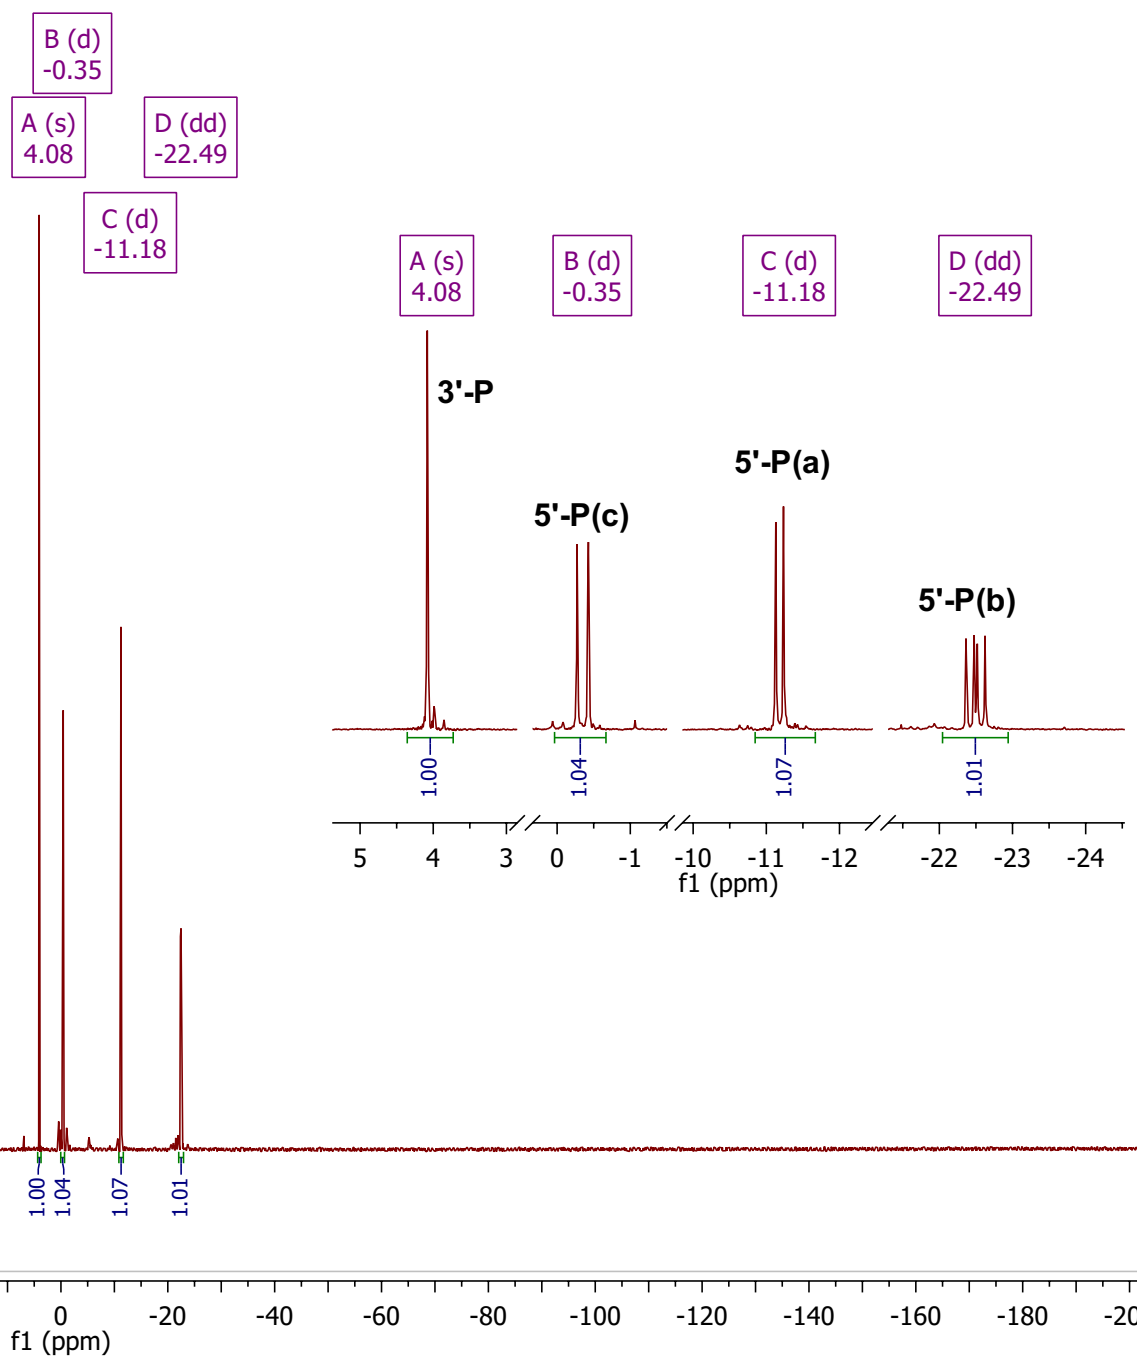

Compound 15 (diethylamido-pppAp),  $^{31}\text{P}$  - NMR ( $\text{D}_2\text{O}$ , 162 MHz)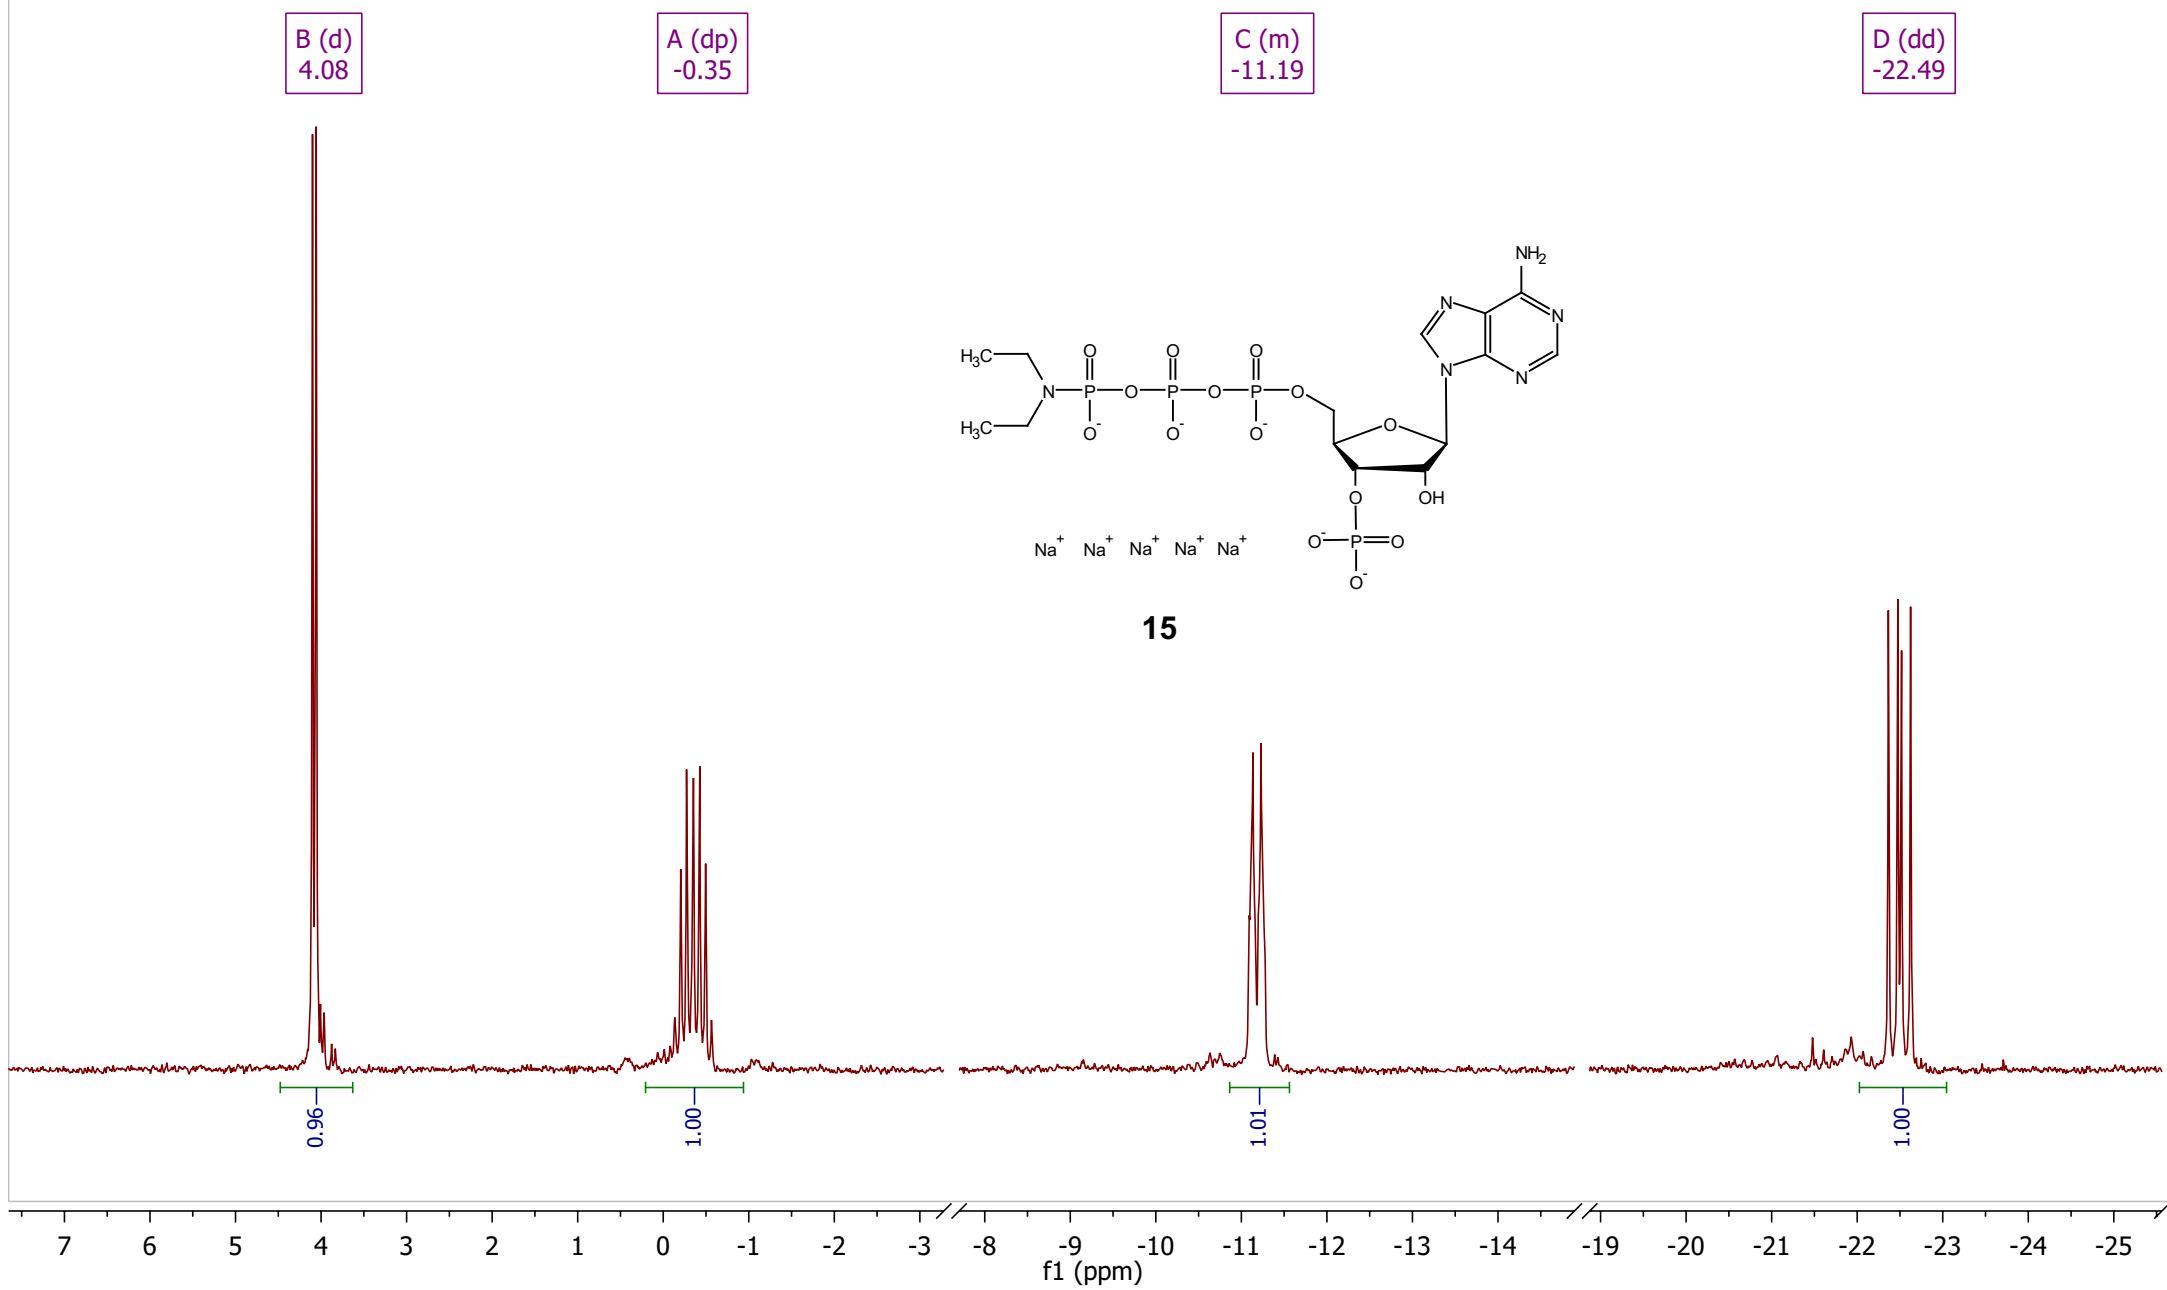

Compound 15 (diethylamido-pppAp), DQF-COSY (D<sub>2</sub>O)

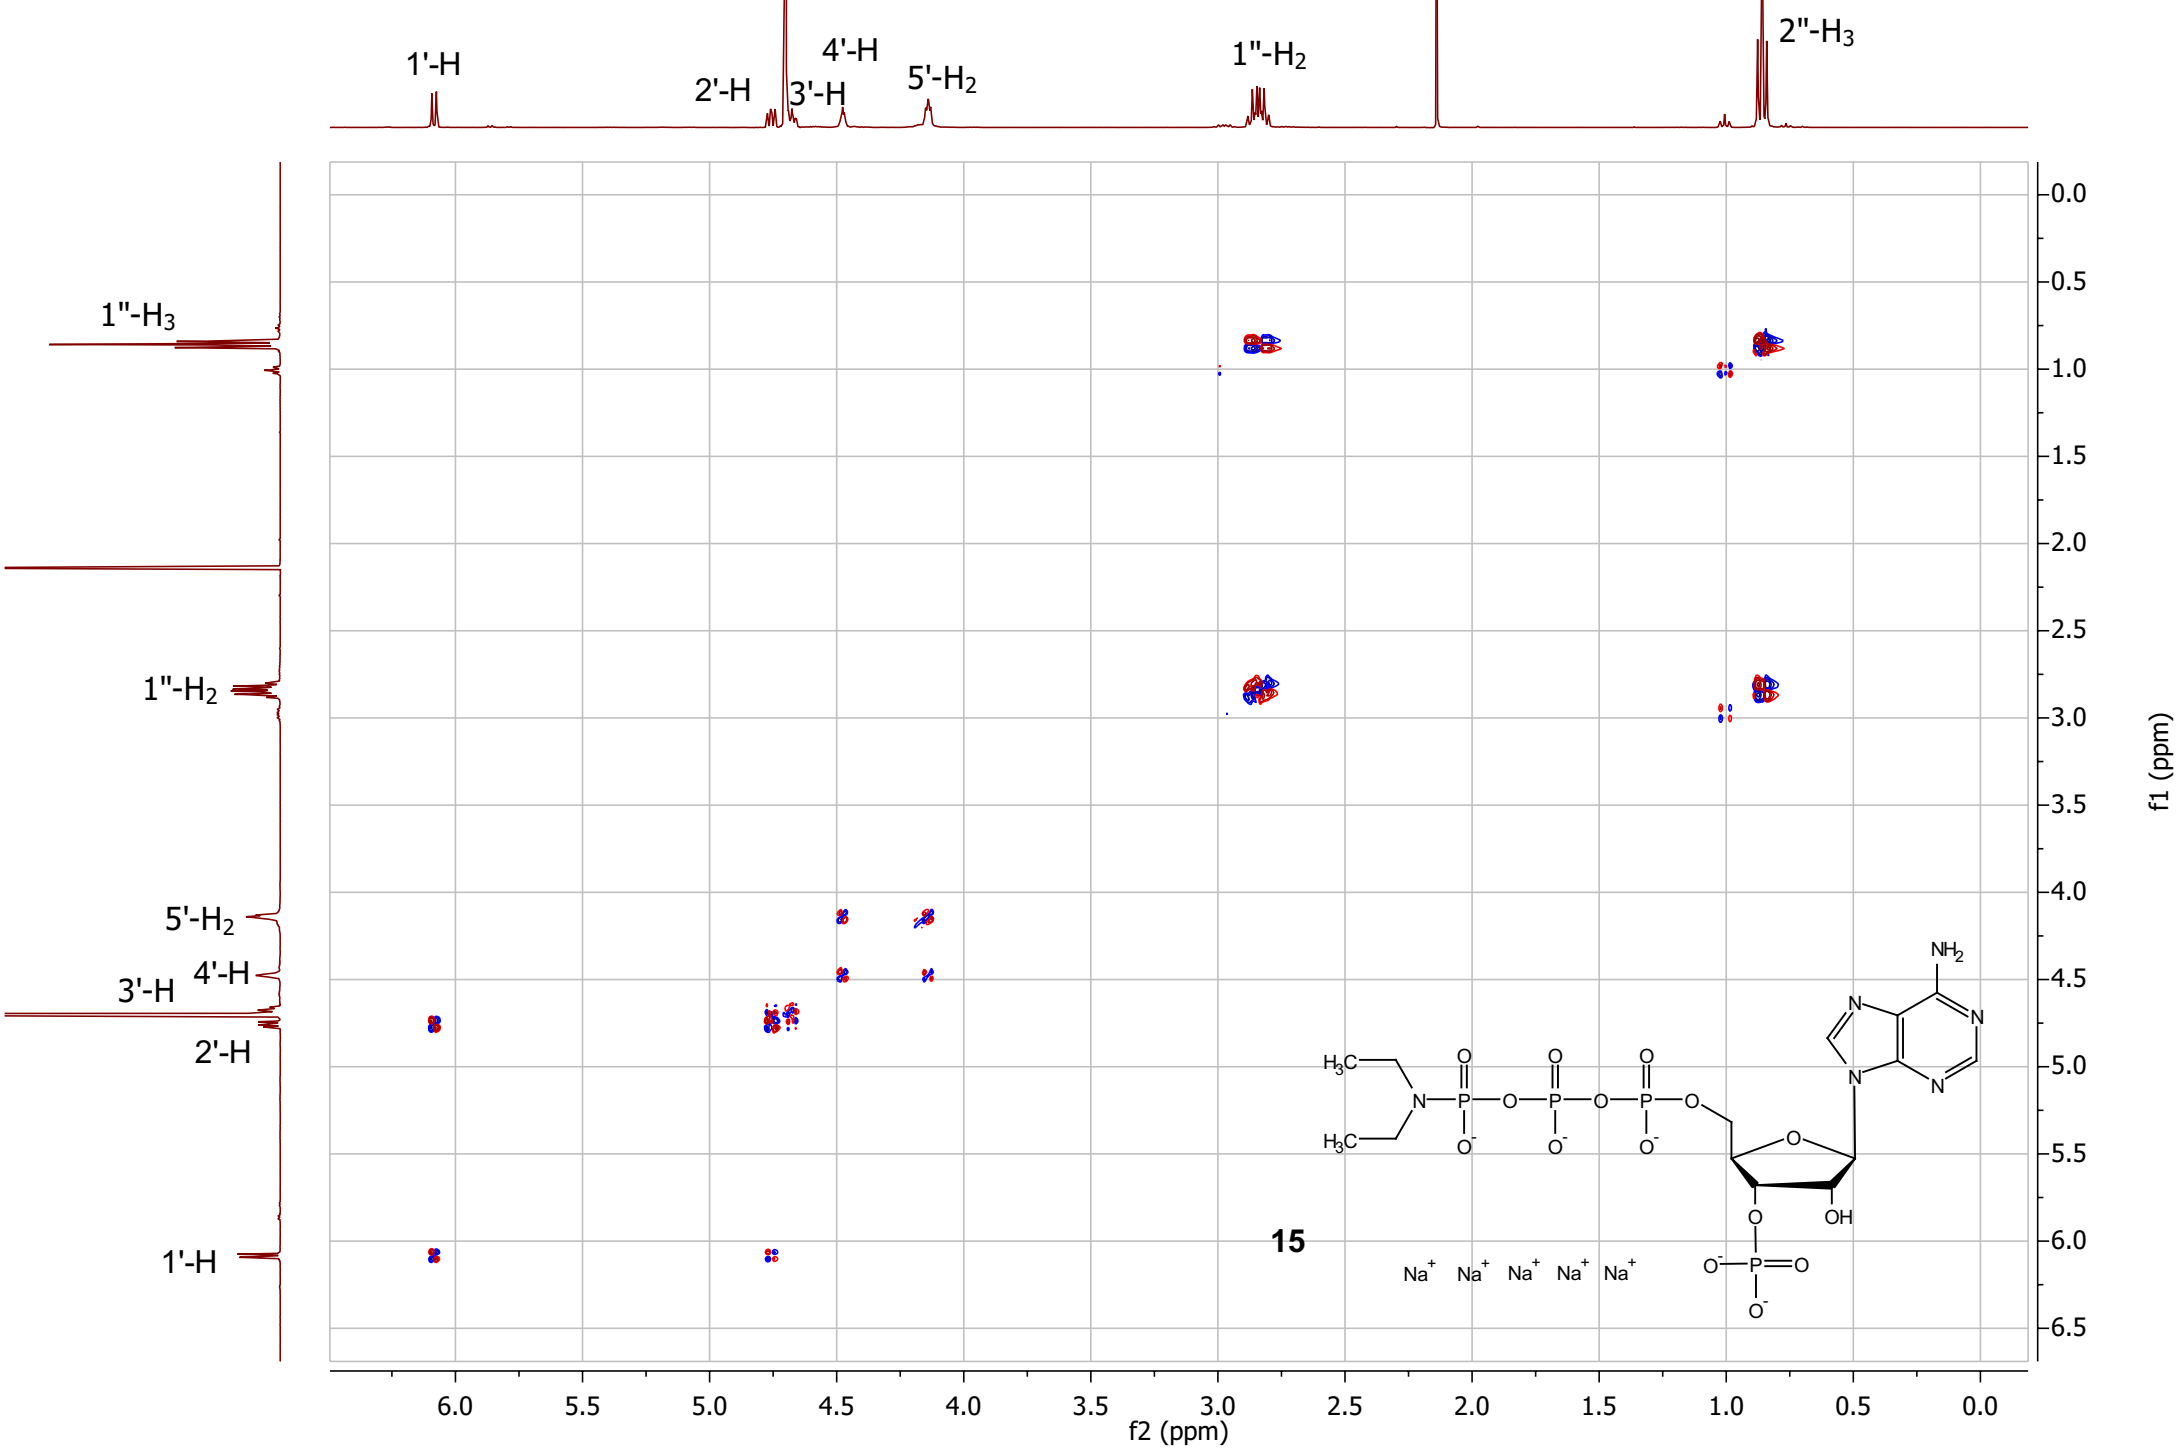



Compound 15 (diethylamido-pppAp), HSQC (D<sub>2</sub>O)

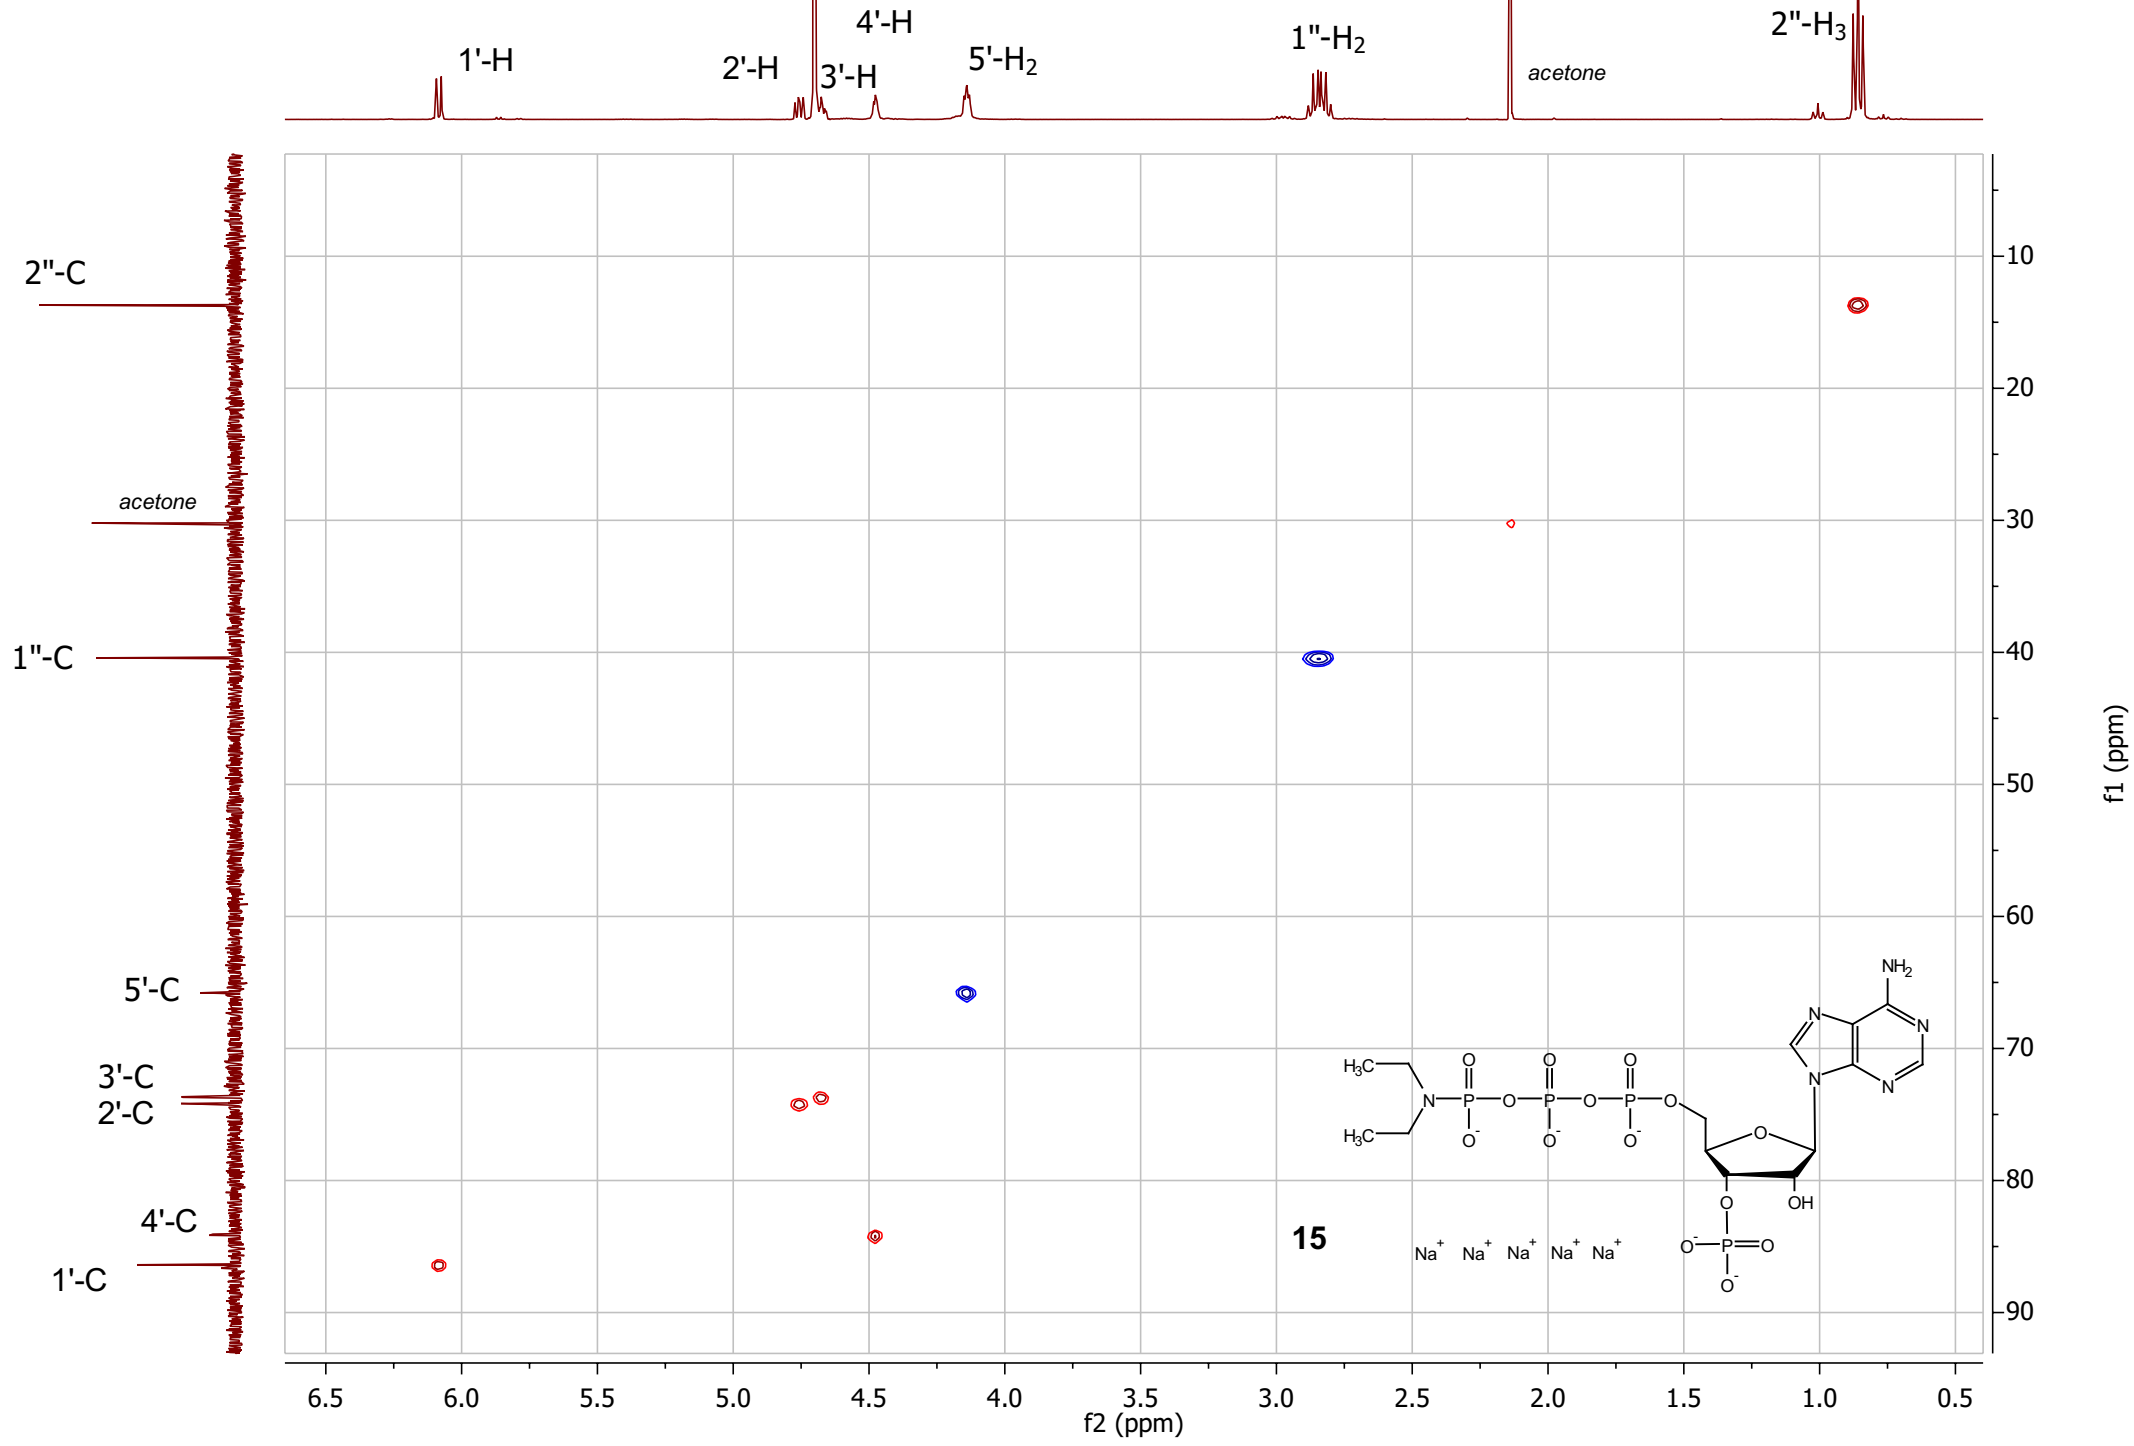

Compound 15 (diethylamido-pppAp), <sup>1</sup>H - <sup>31</sup>P - HMBC (D<sub>2</sub>O)

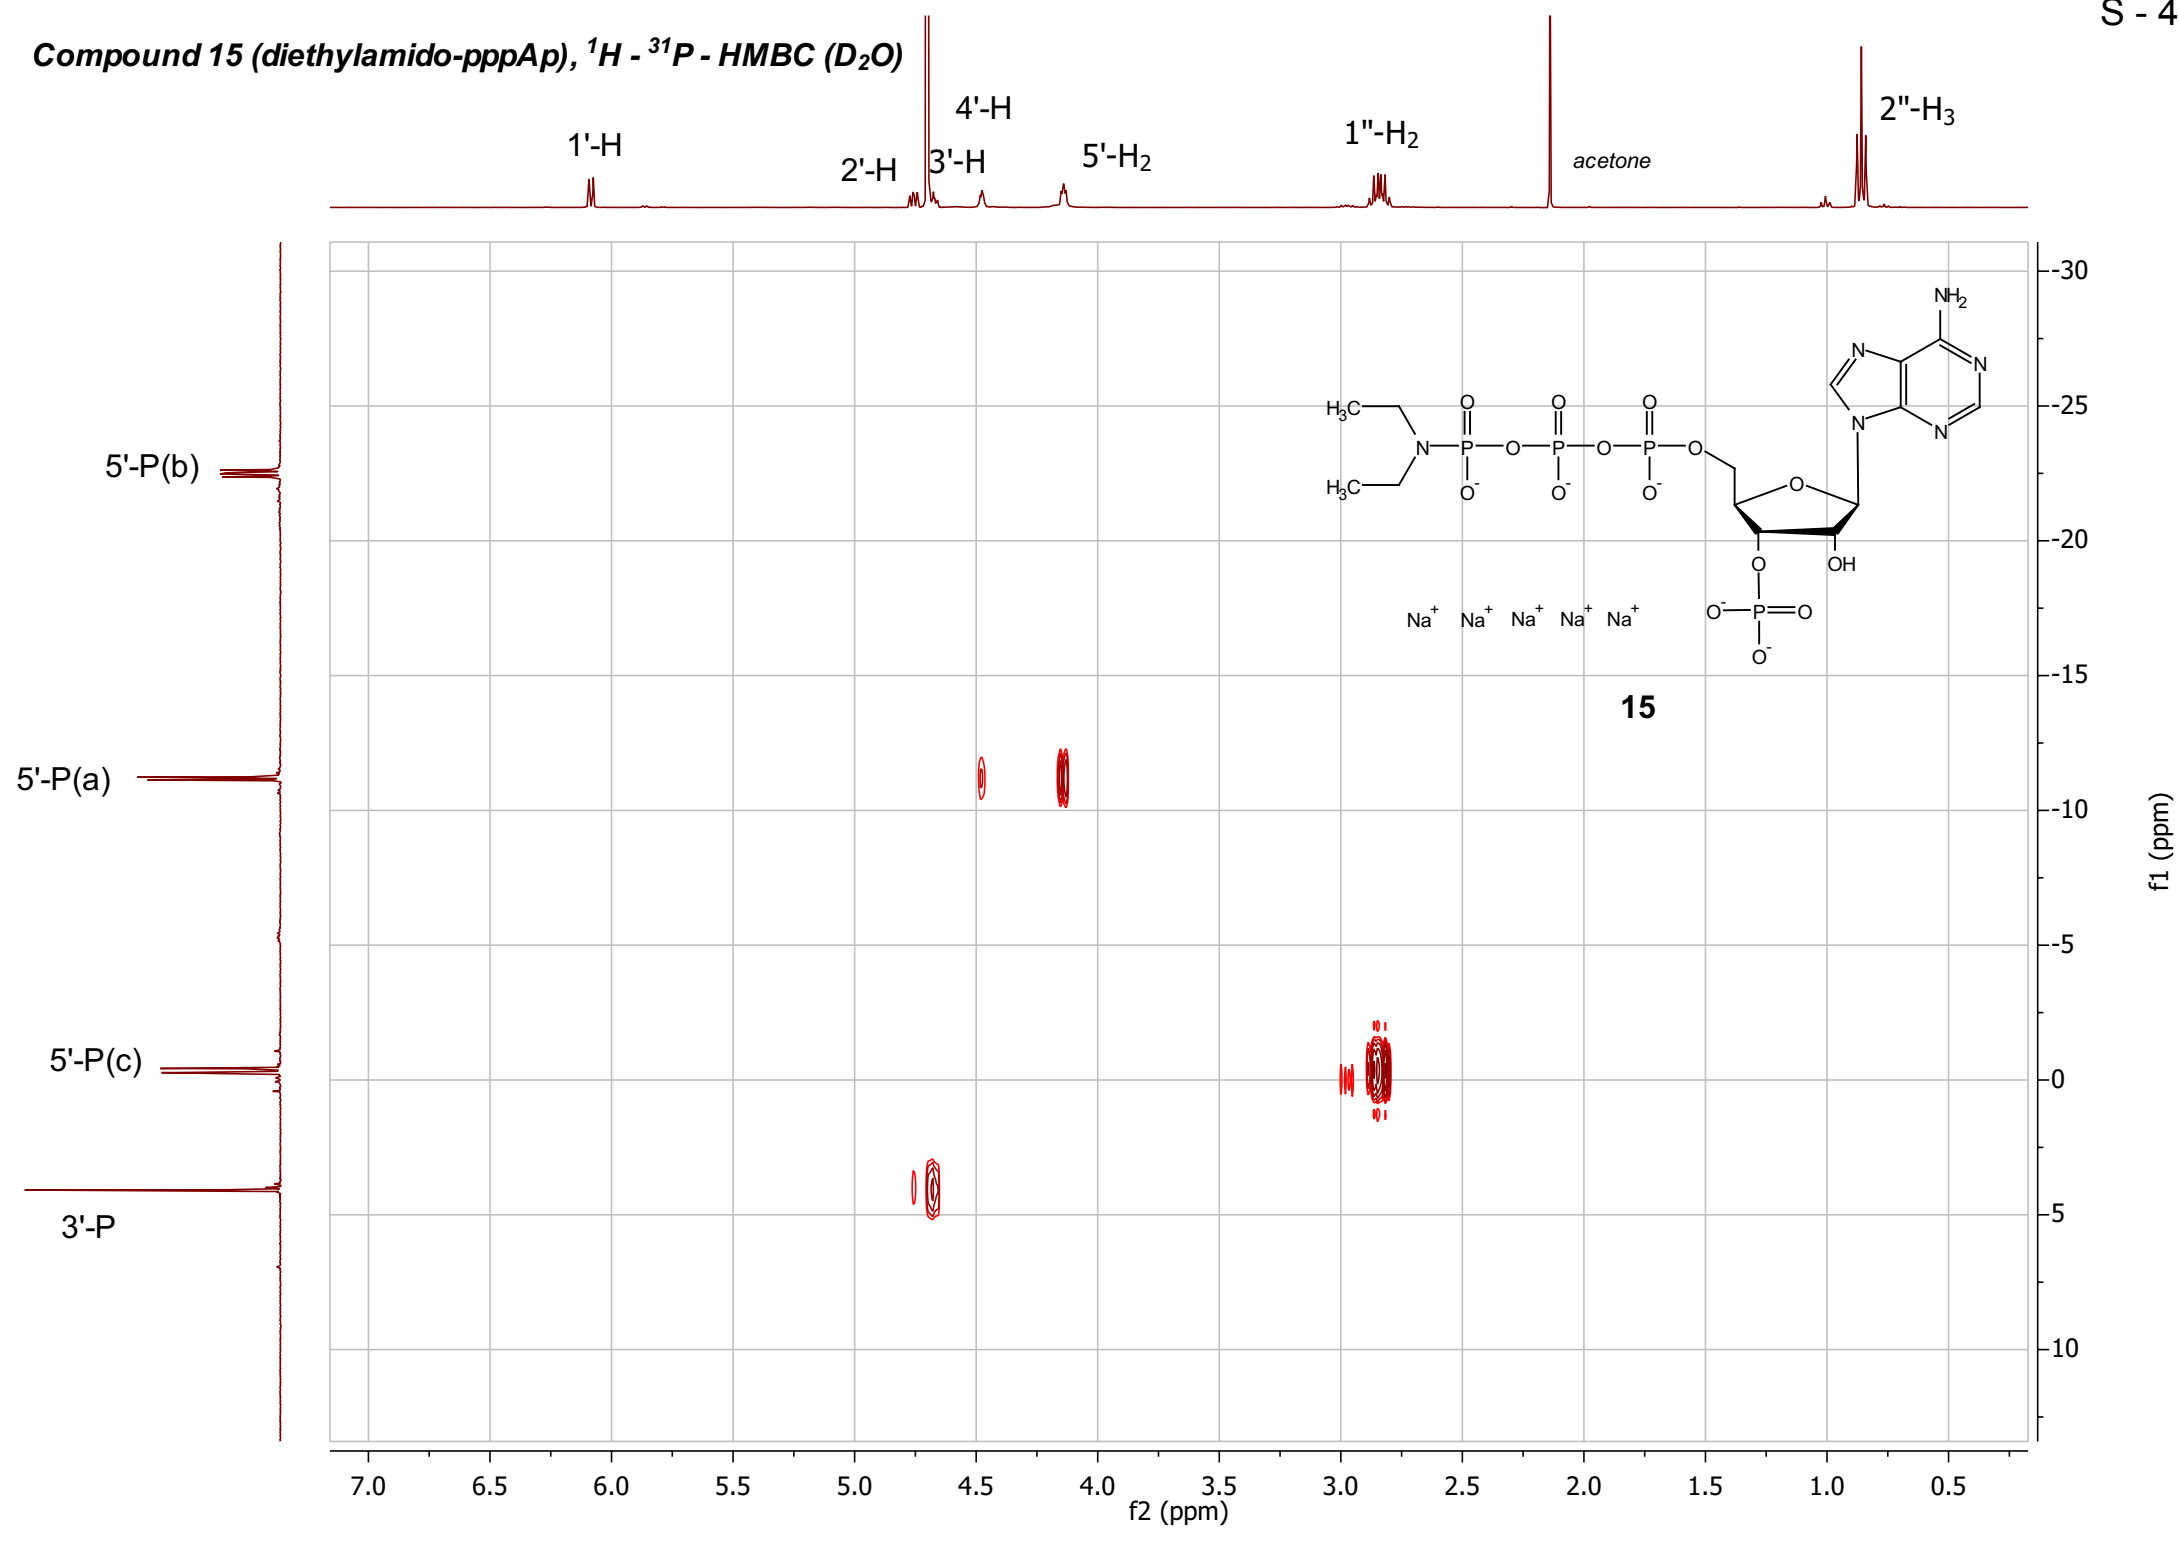

Compound 15 (diethylamido-pppAp), PP-COSY (D<sub>2</sub>O)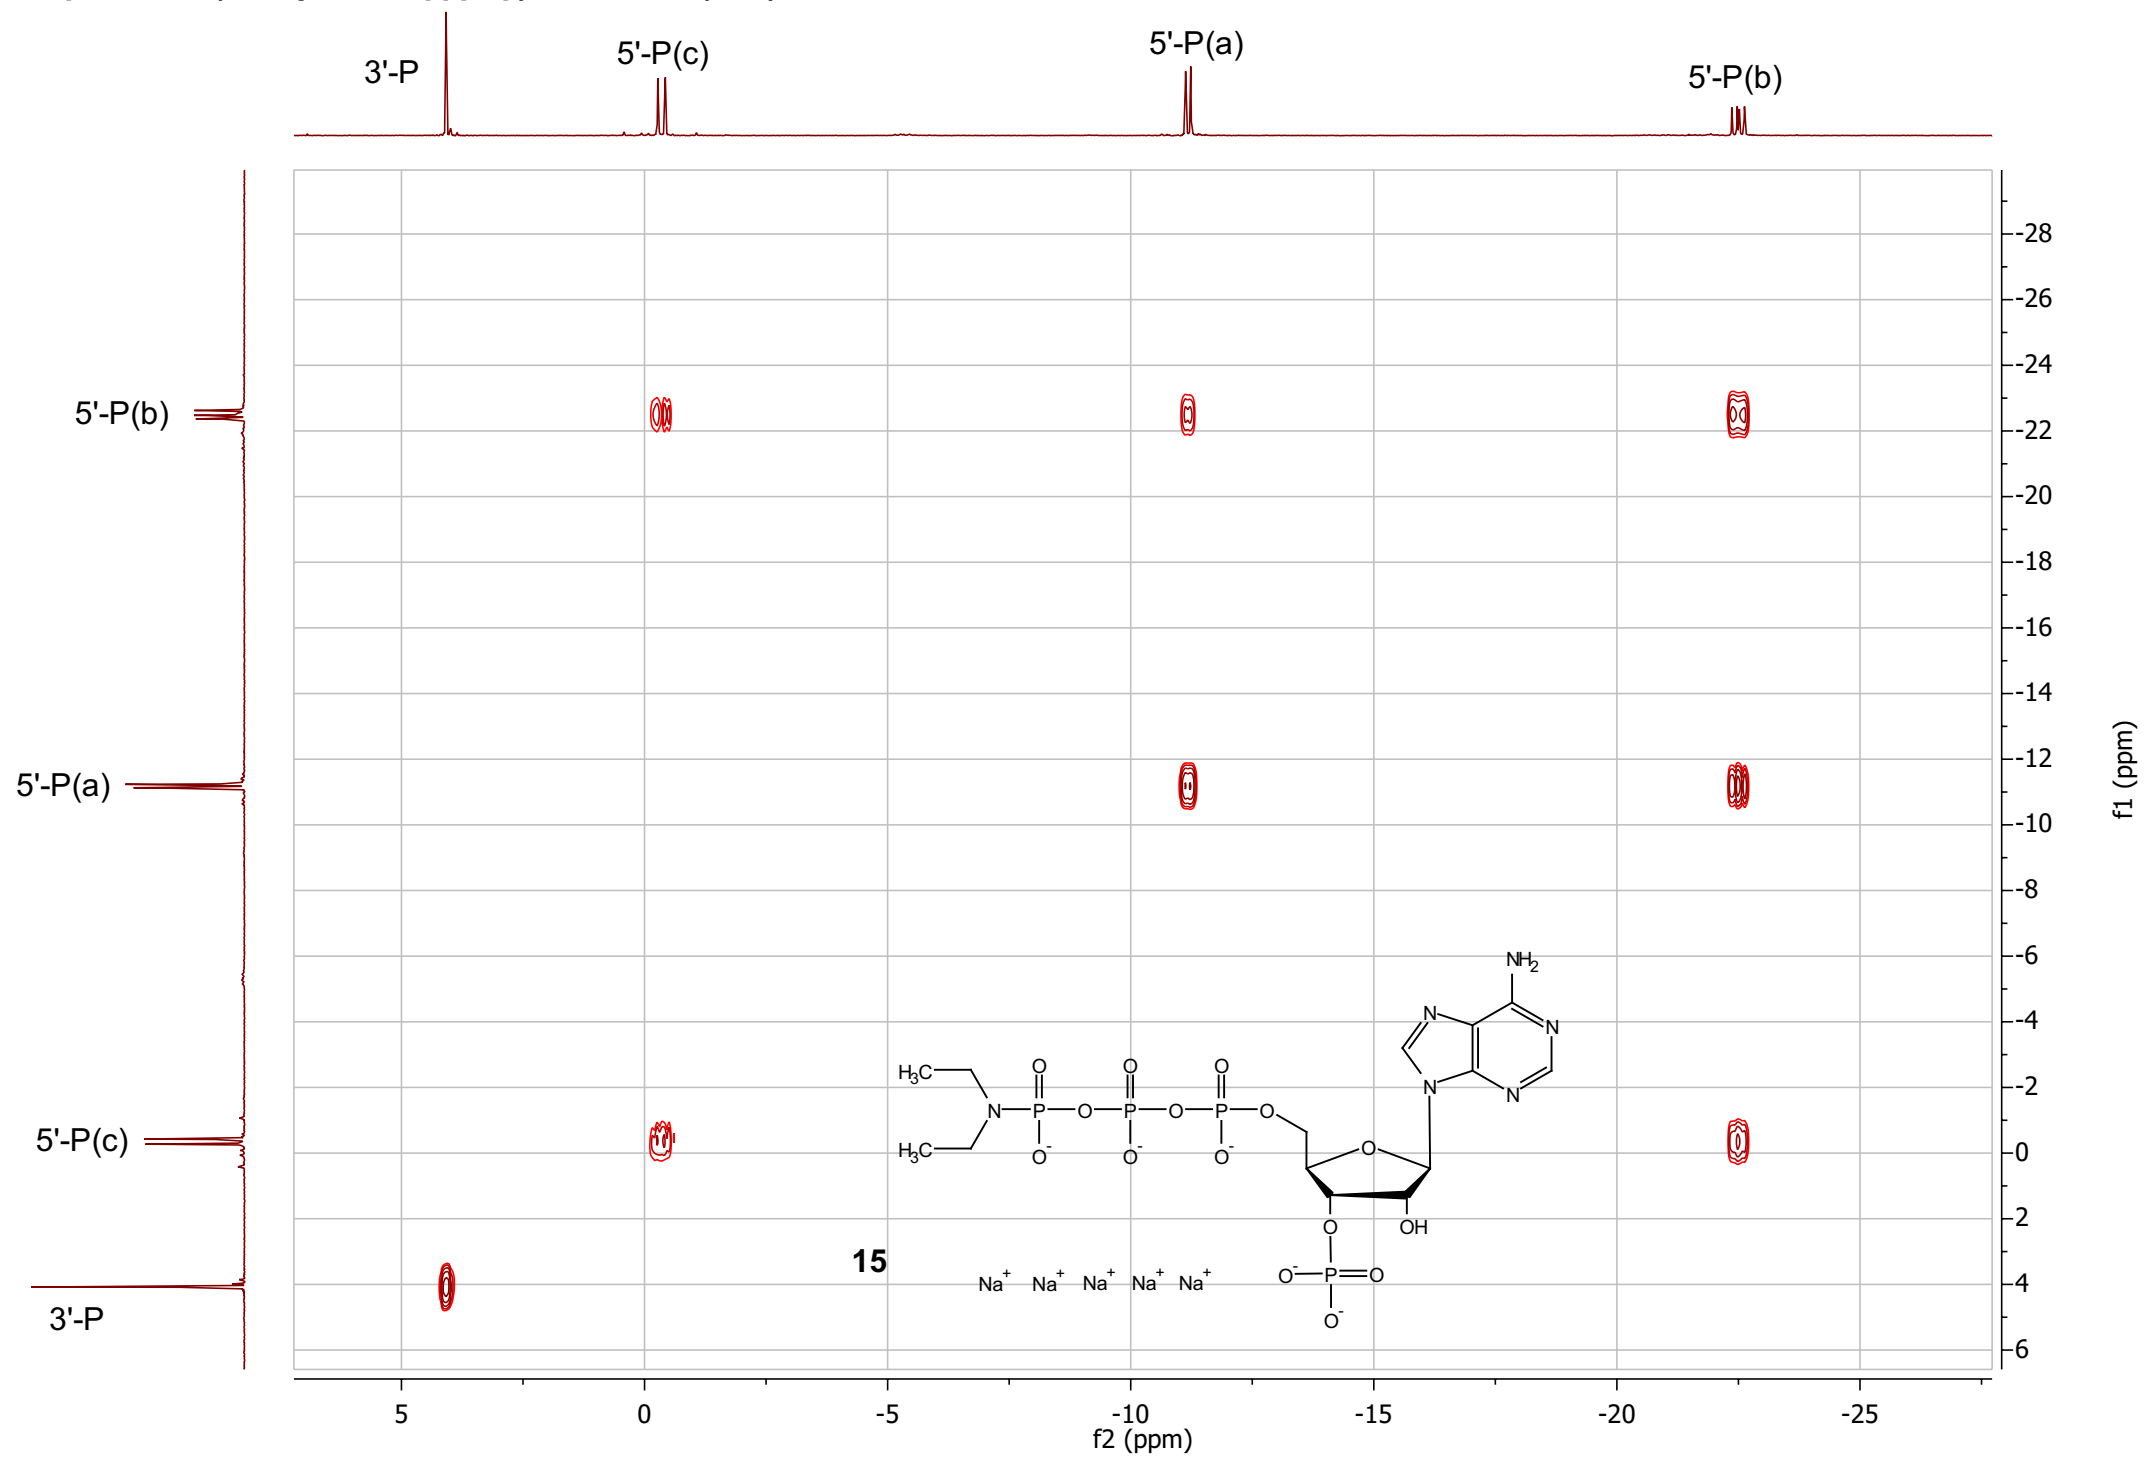

**Compound 15 (diethylamido-pppAp),  $^{13}\text{C}\{^1\text{H}\}$  - NMR ( $\text{D}_2\text{O}$ , 101 MHz)**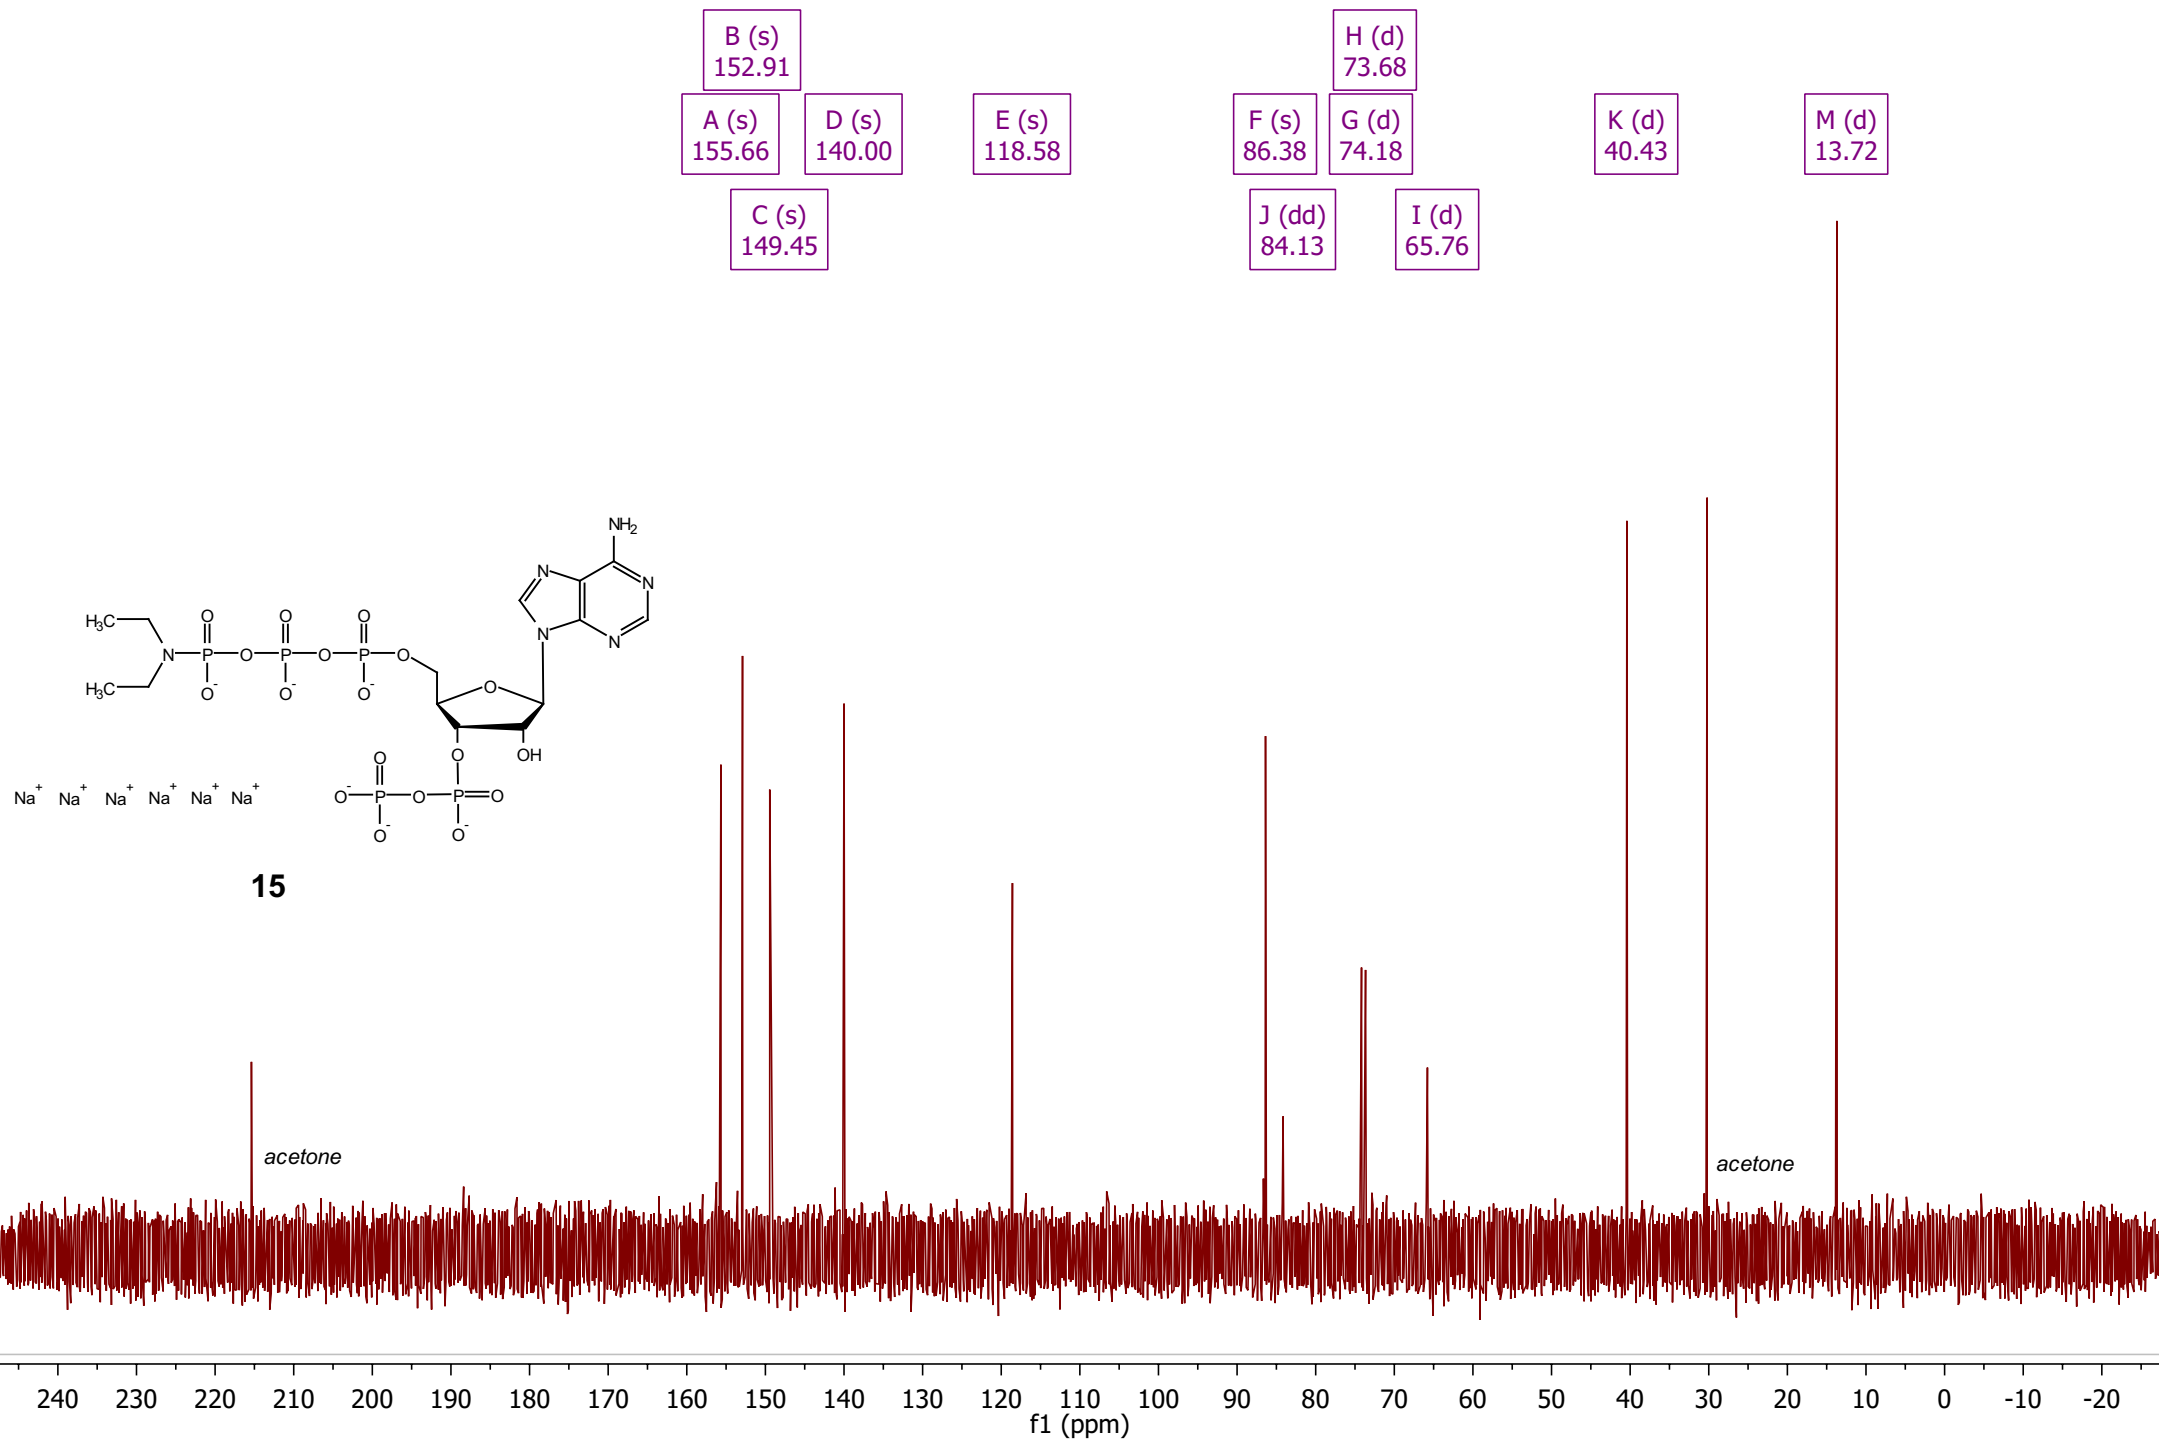

Compound 18 (propargylamido-pppApp),  $^1\text{H}$  - NMR ( $\text{D}_2\text{O}$ , 400 MHz)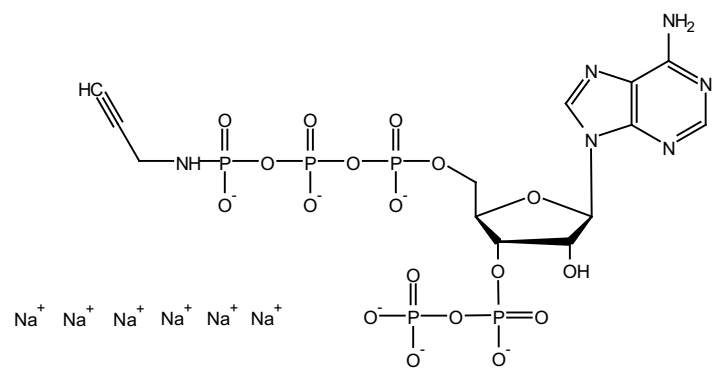

18

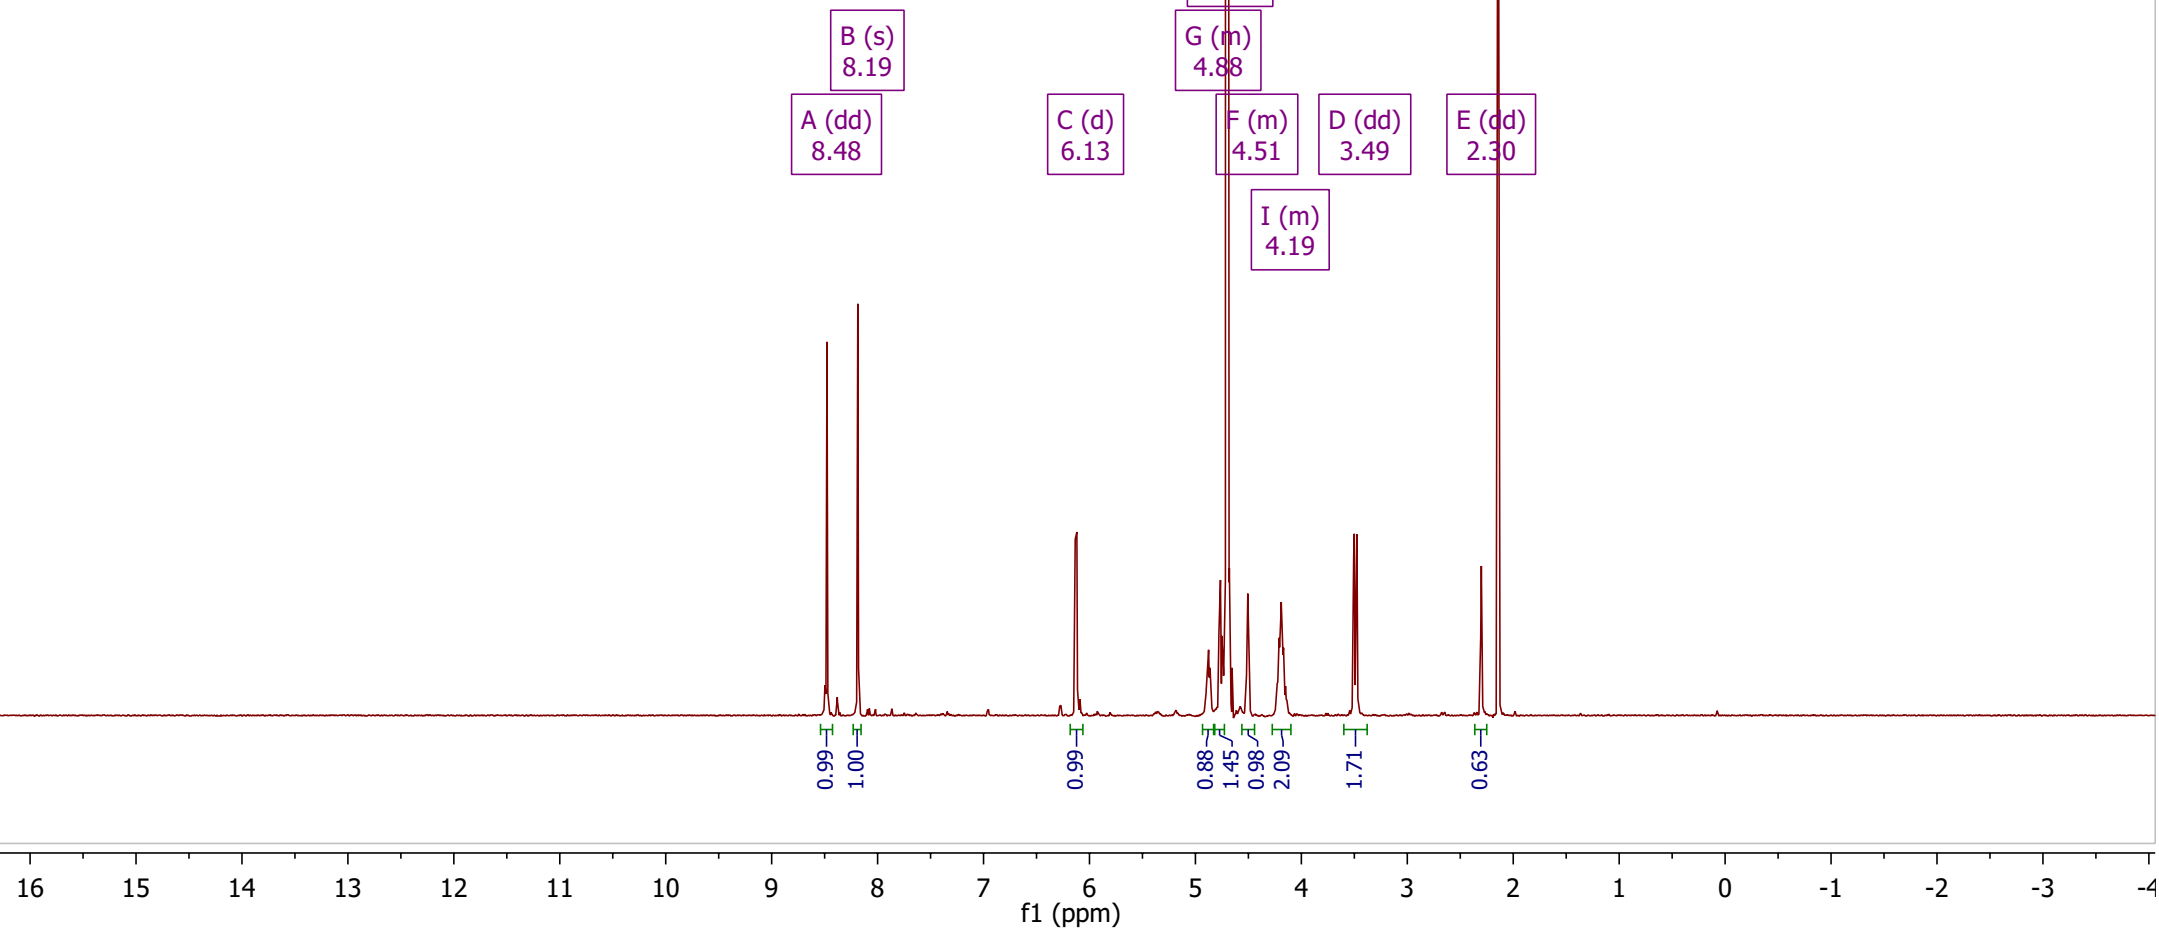

**Compound 18 (propargylamido-pppApp),  $^{31}\text{P}\{^1\text{H}\}$  - NMR ( $\text{D}_2\text{O}$ , 162 MHz)**

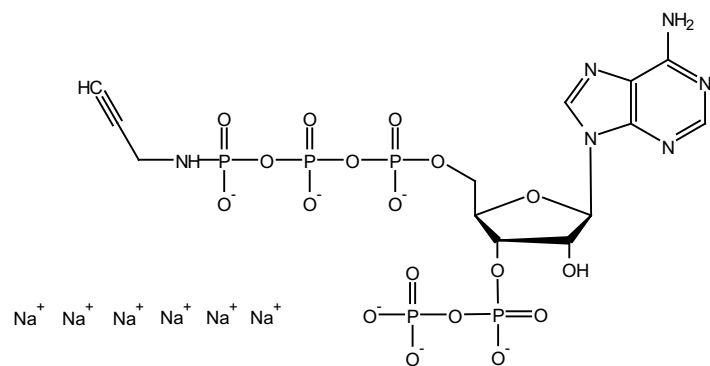

**18**

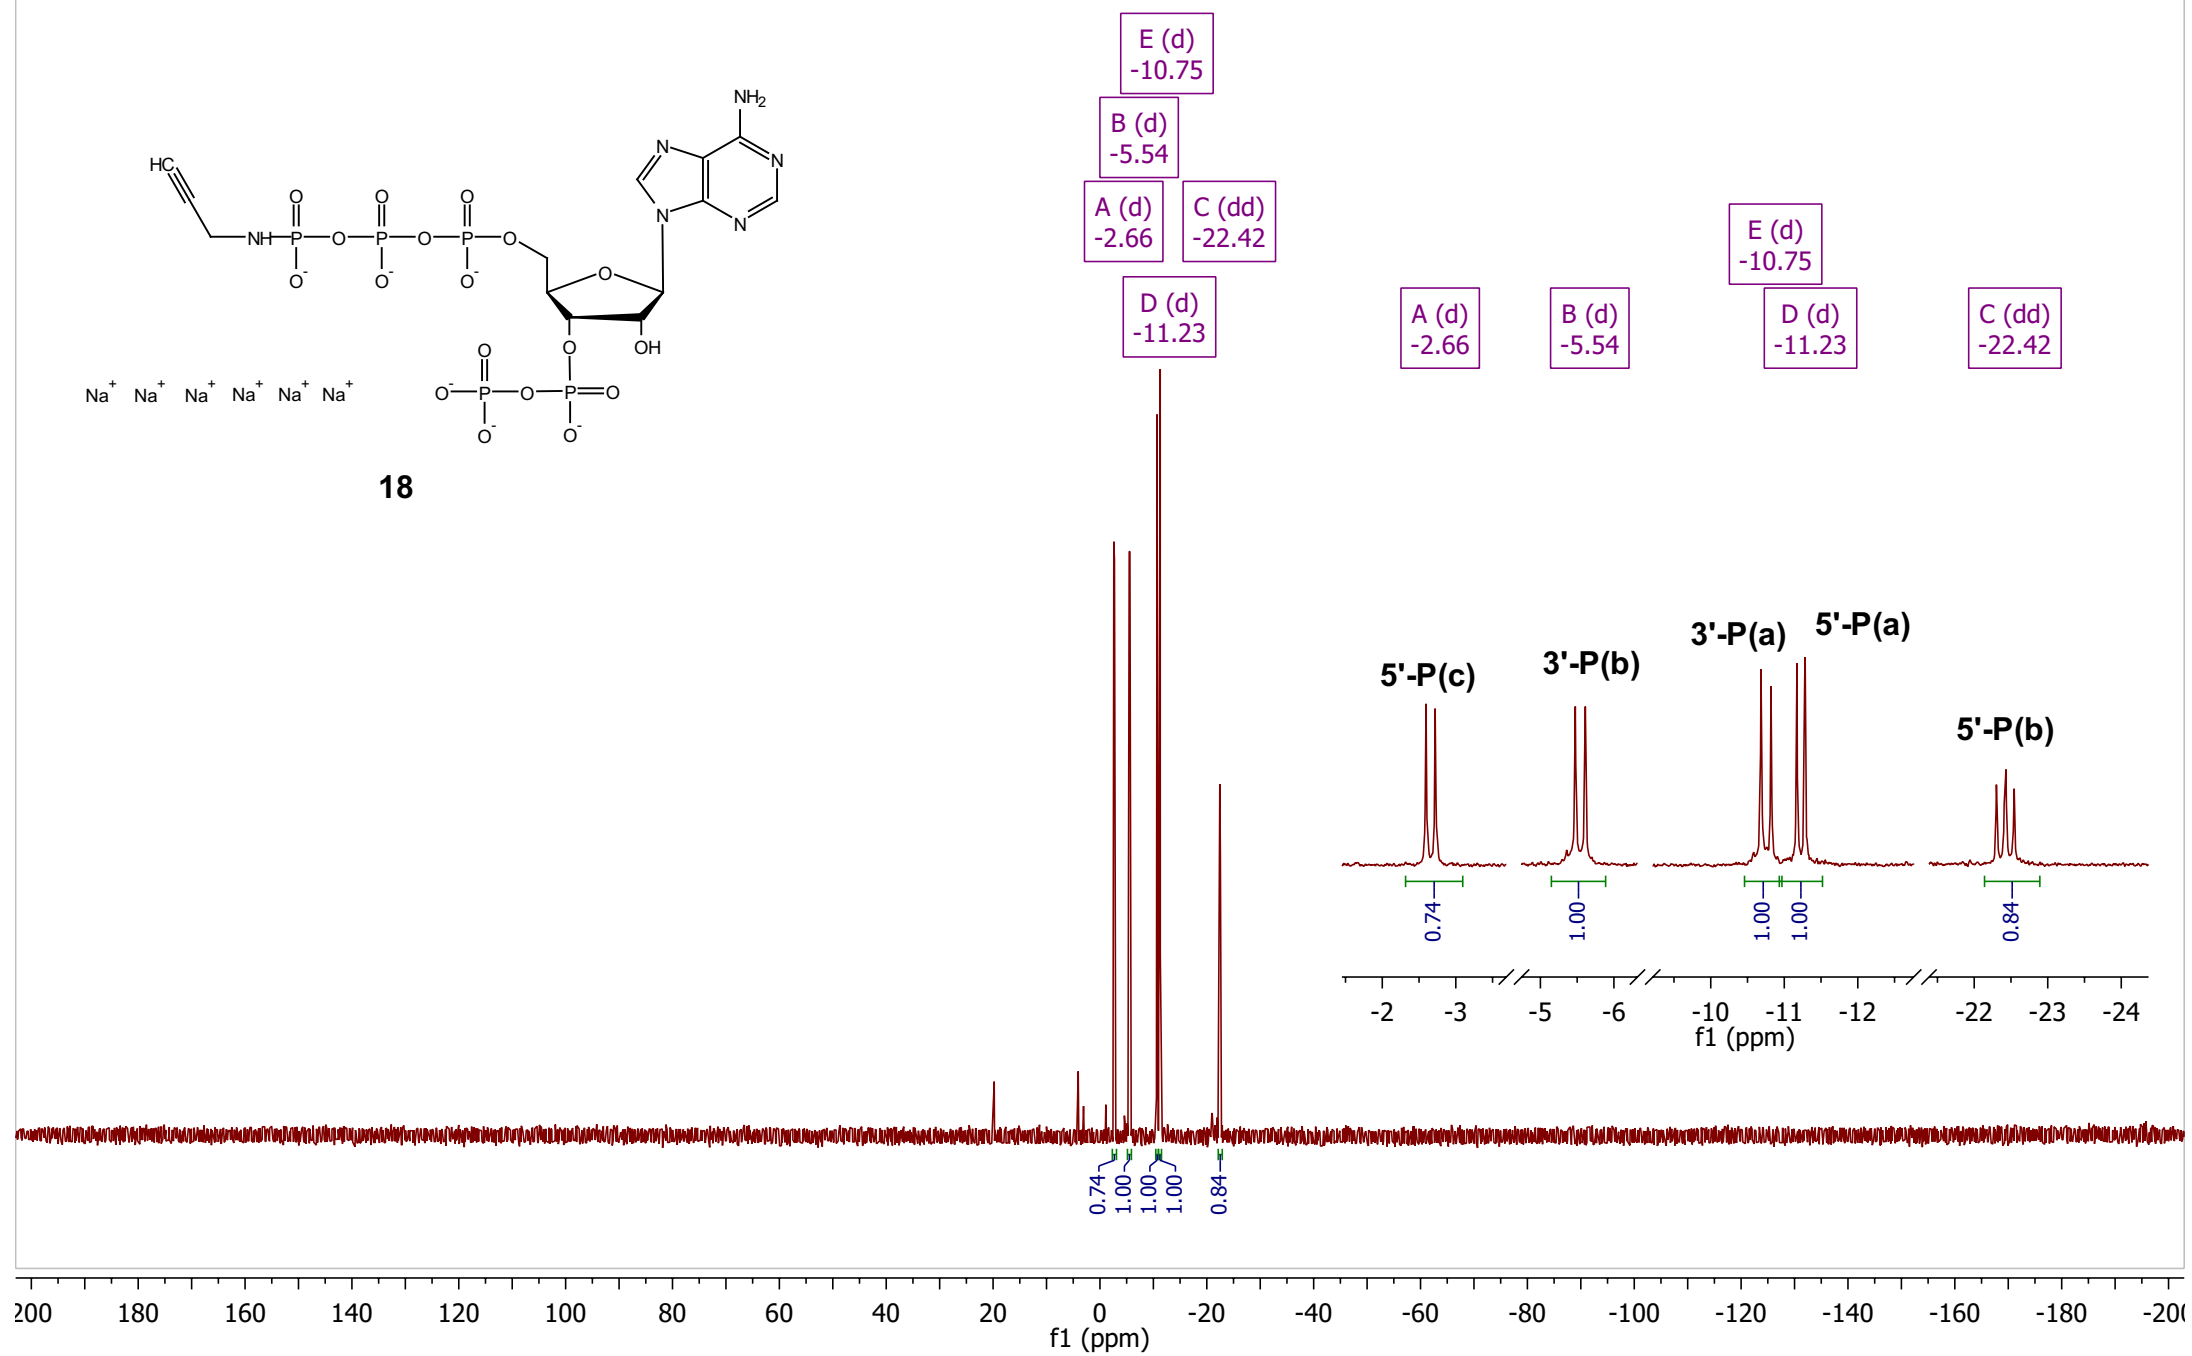

Compound 18 (propargylamido-pppApp),  $^{31}\text{P}$  - NMR ( $\text{D}_2\text{O}$ , 162 MHz)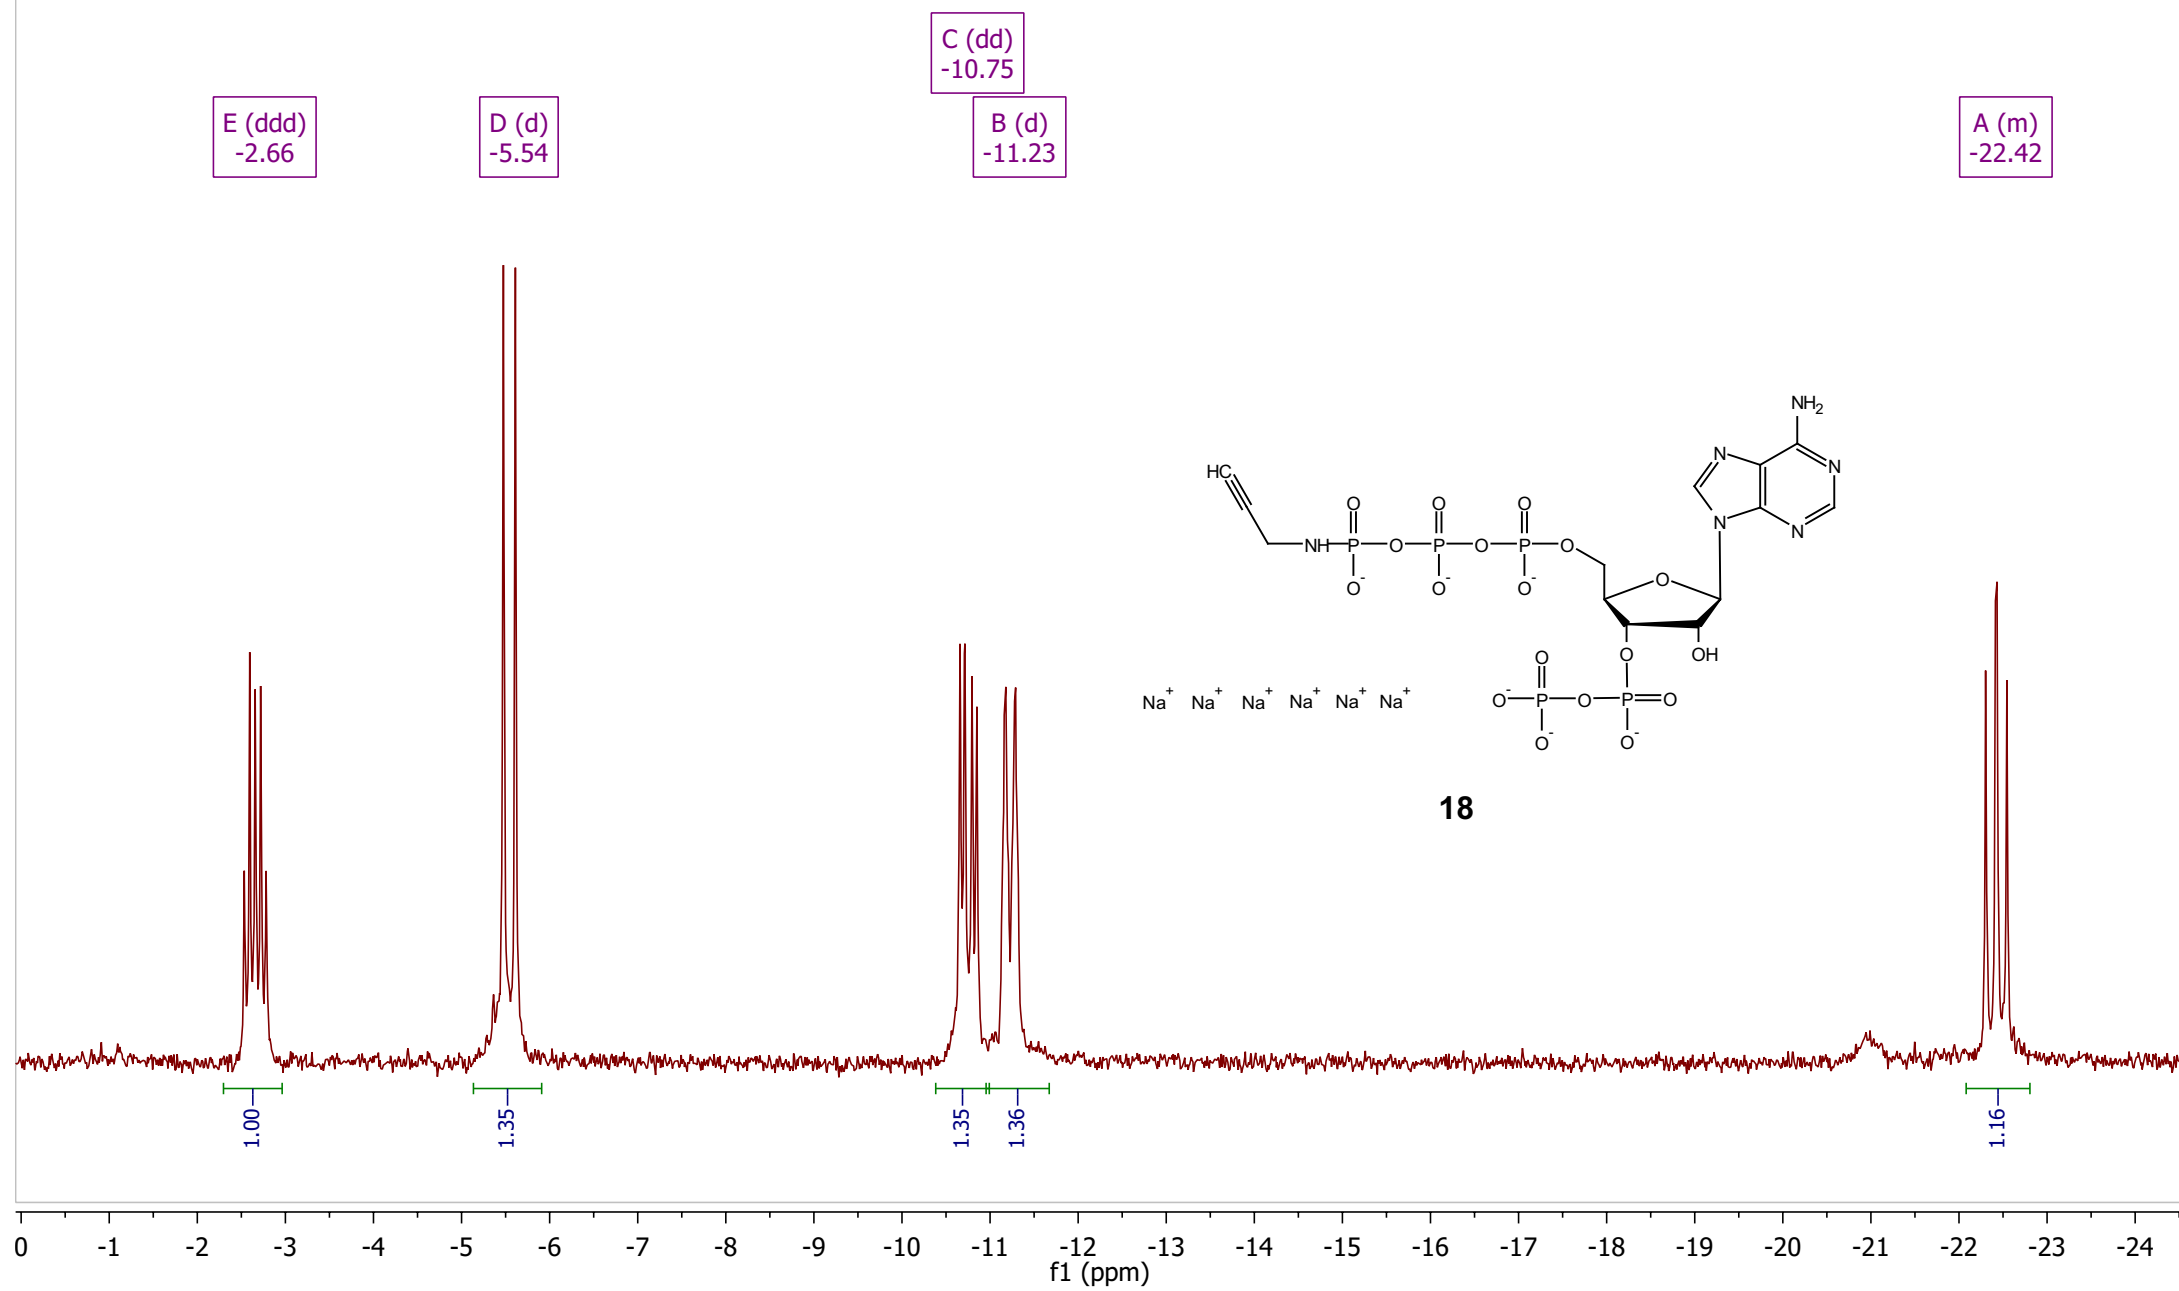





Compound 18 (propargylamido-pppApp), HSQC (D<sub>2</sub>O)

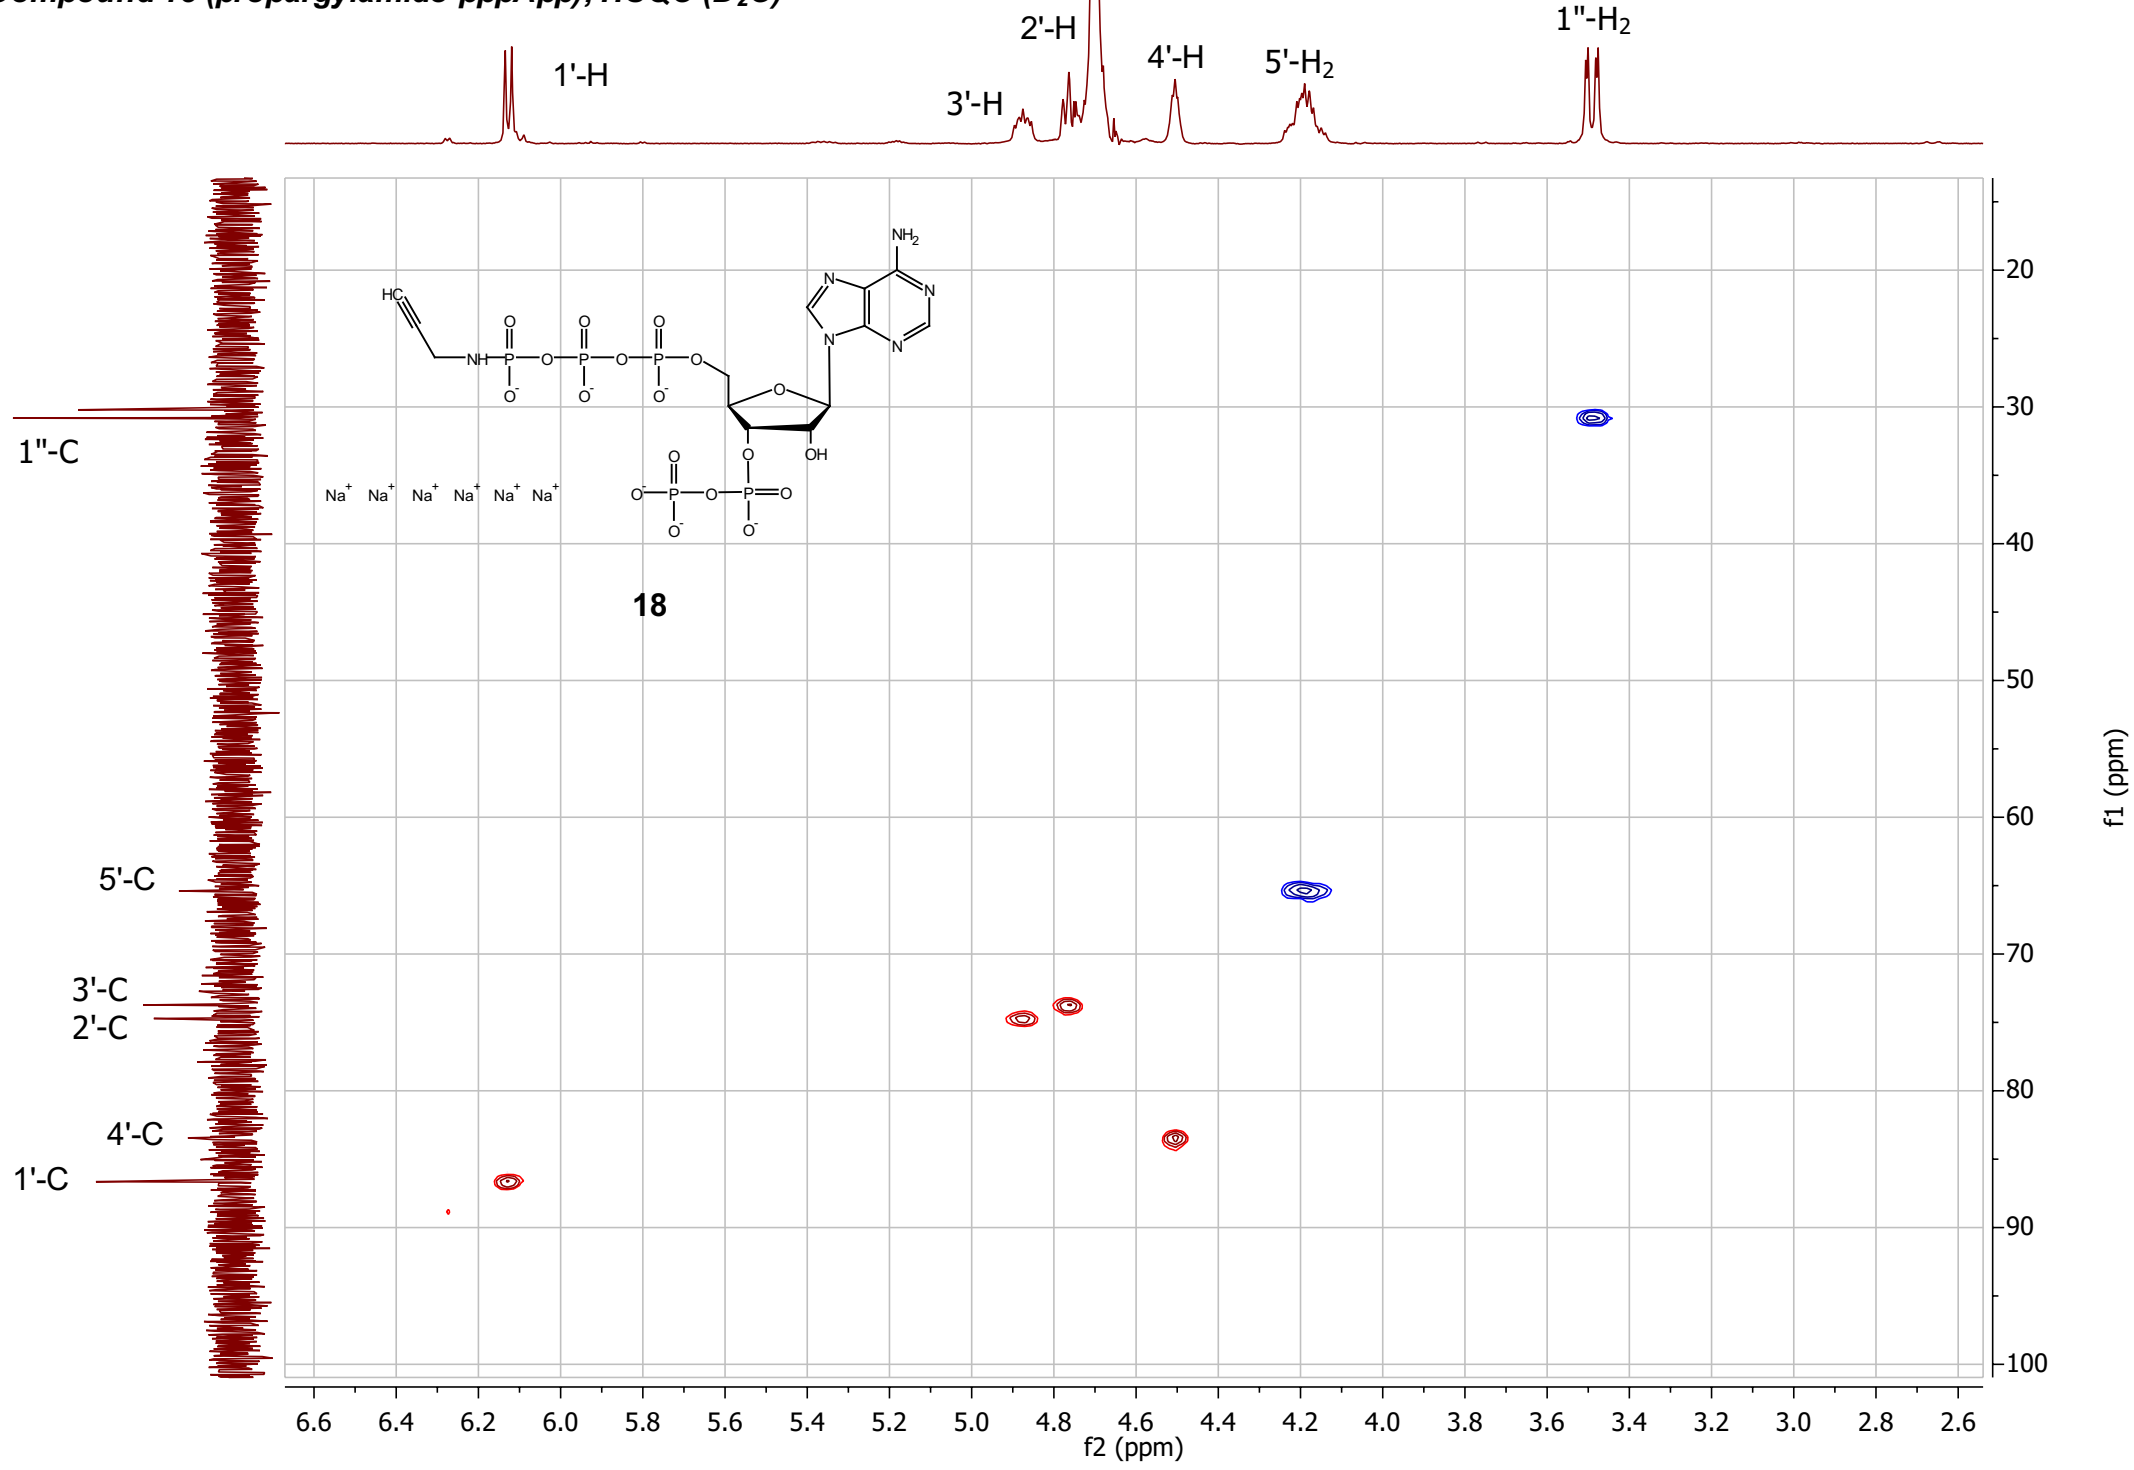

Compound 18 (propargylamido-pppApp),  $^1\text{H}$ - $^{31}\text{P}$  - HMBC ( $\text{D}_2\text{O}$ )

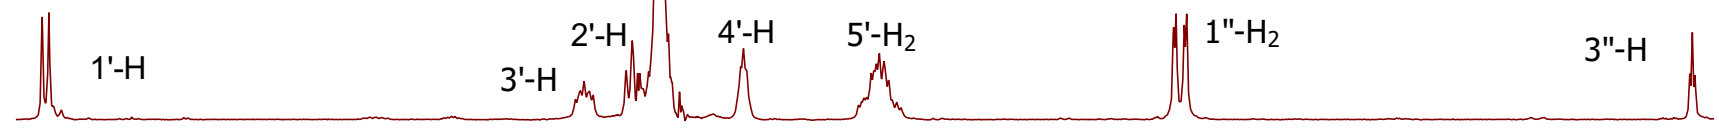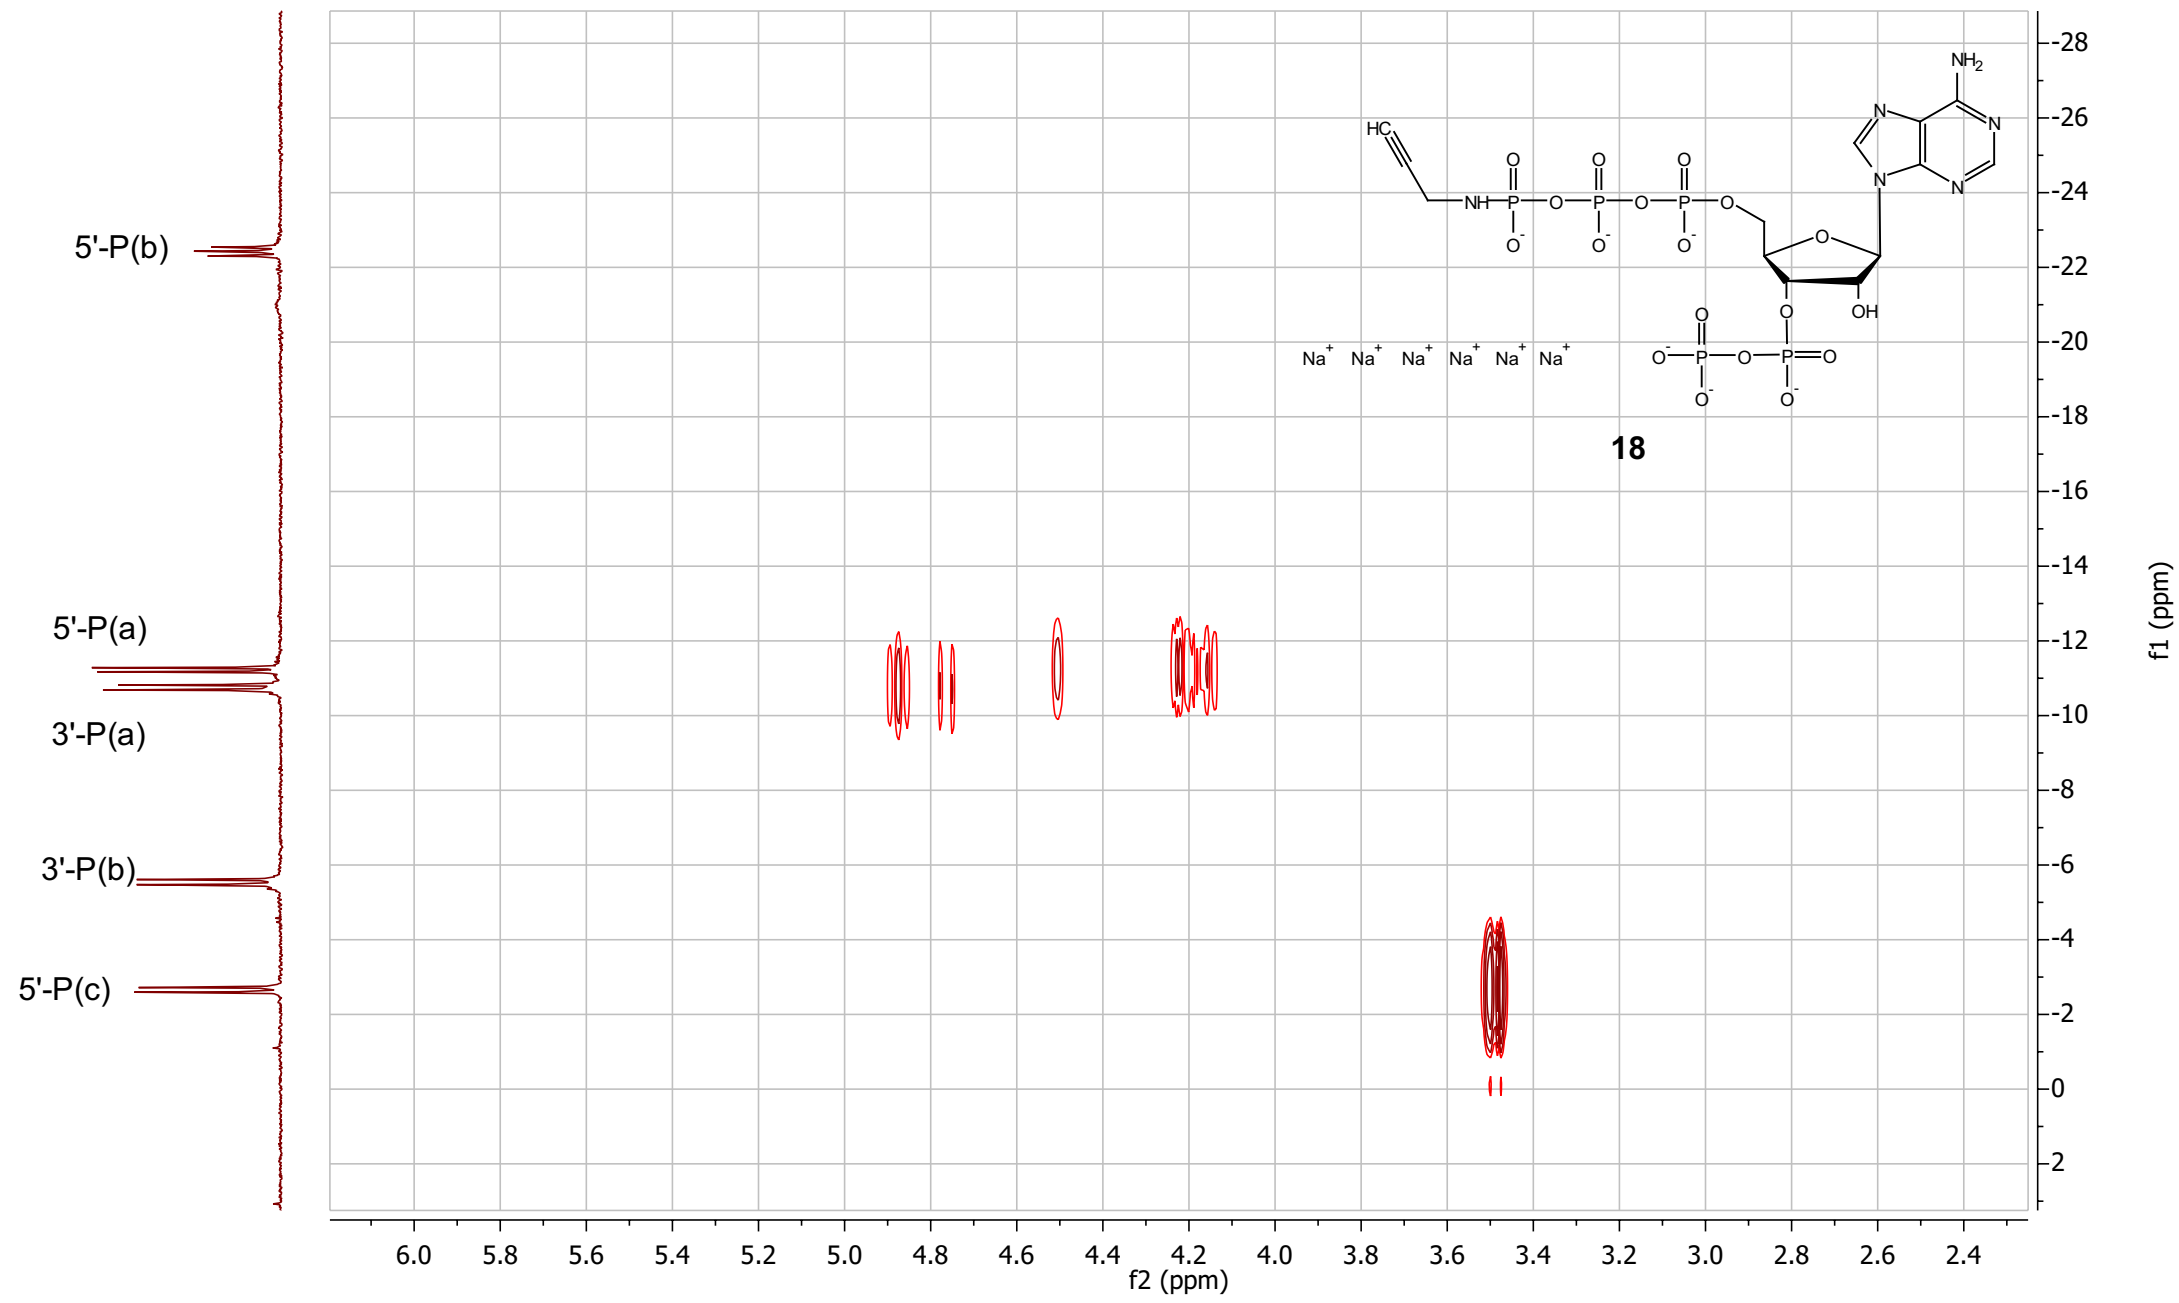

Compound 18 (propargylamido-pppApp), PP-COSY (D<sub>2</sub>O)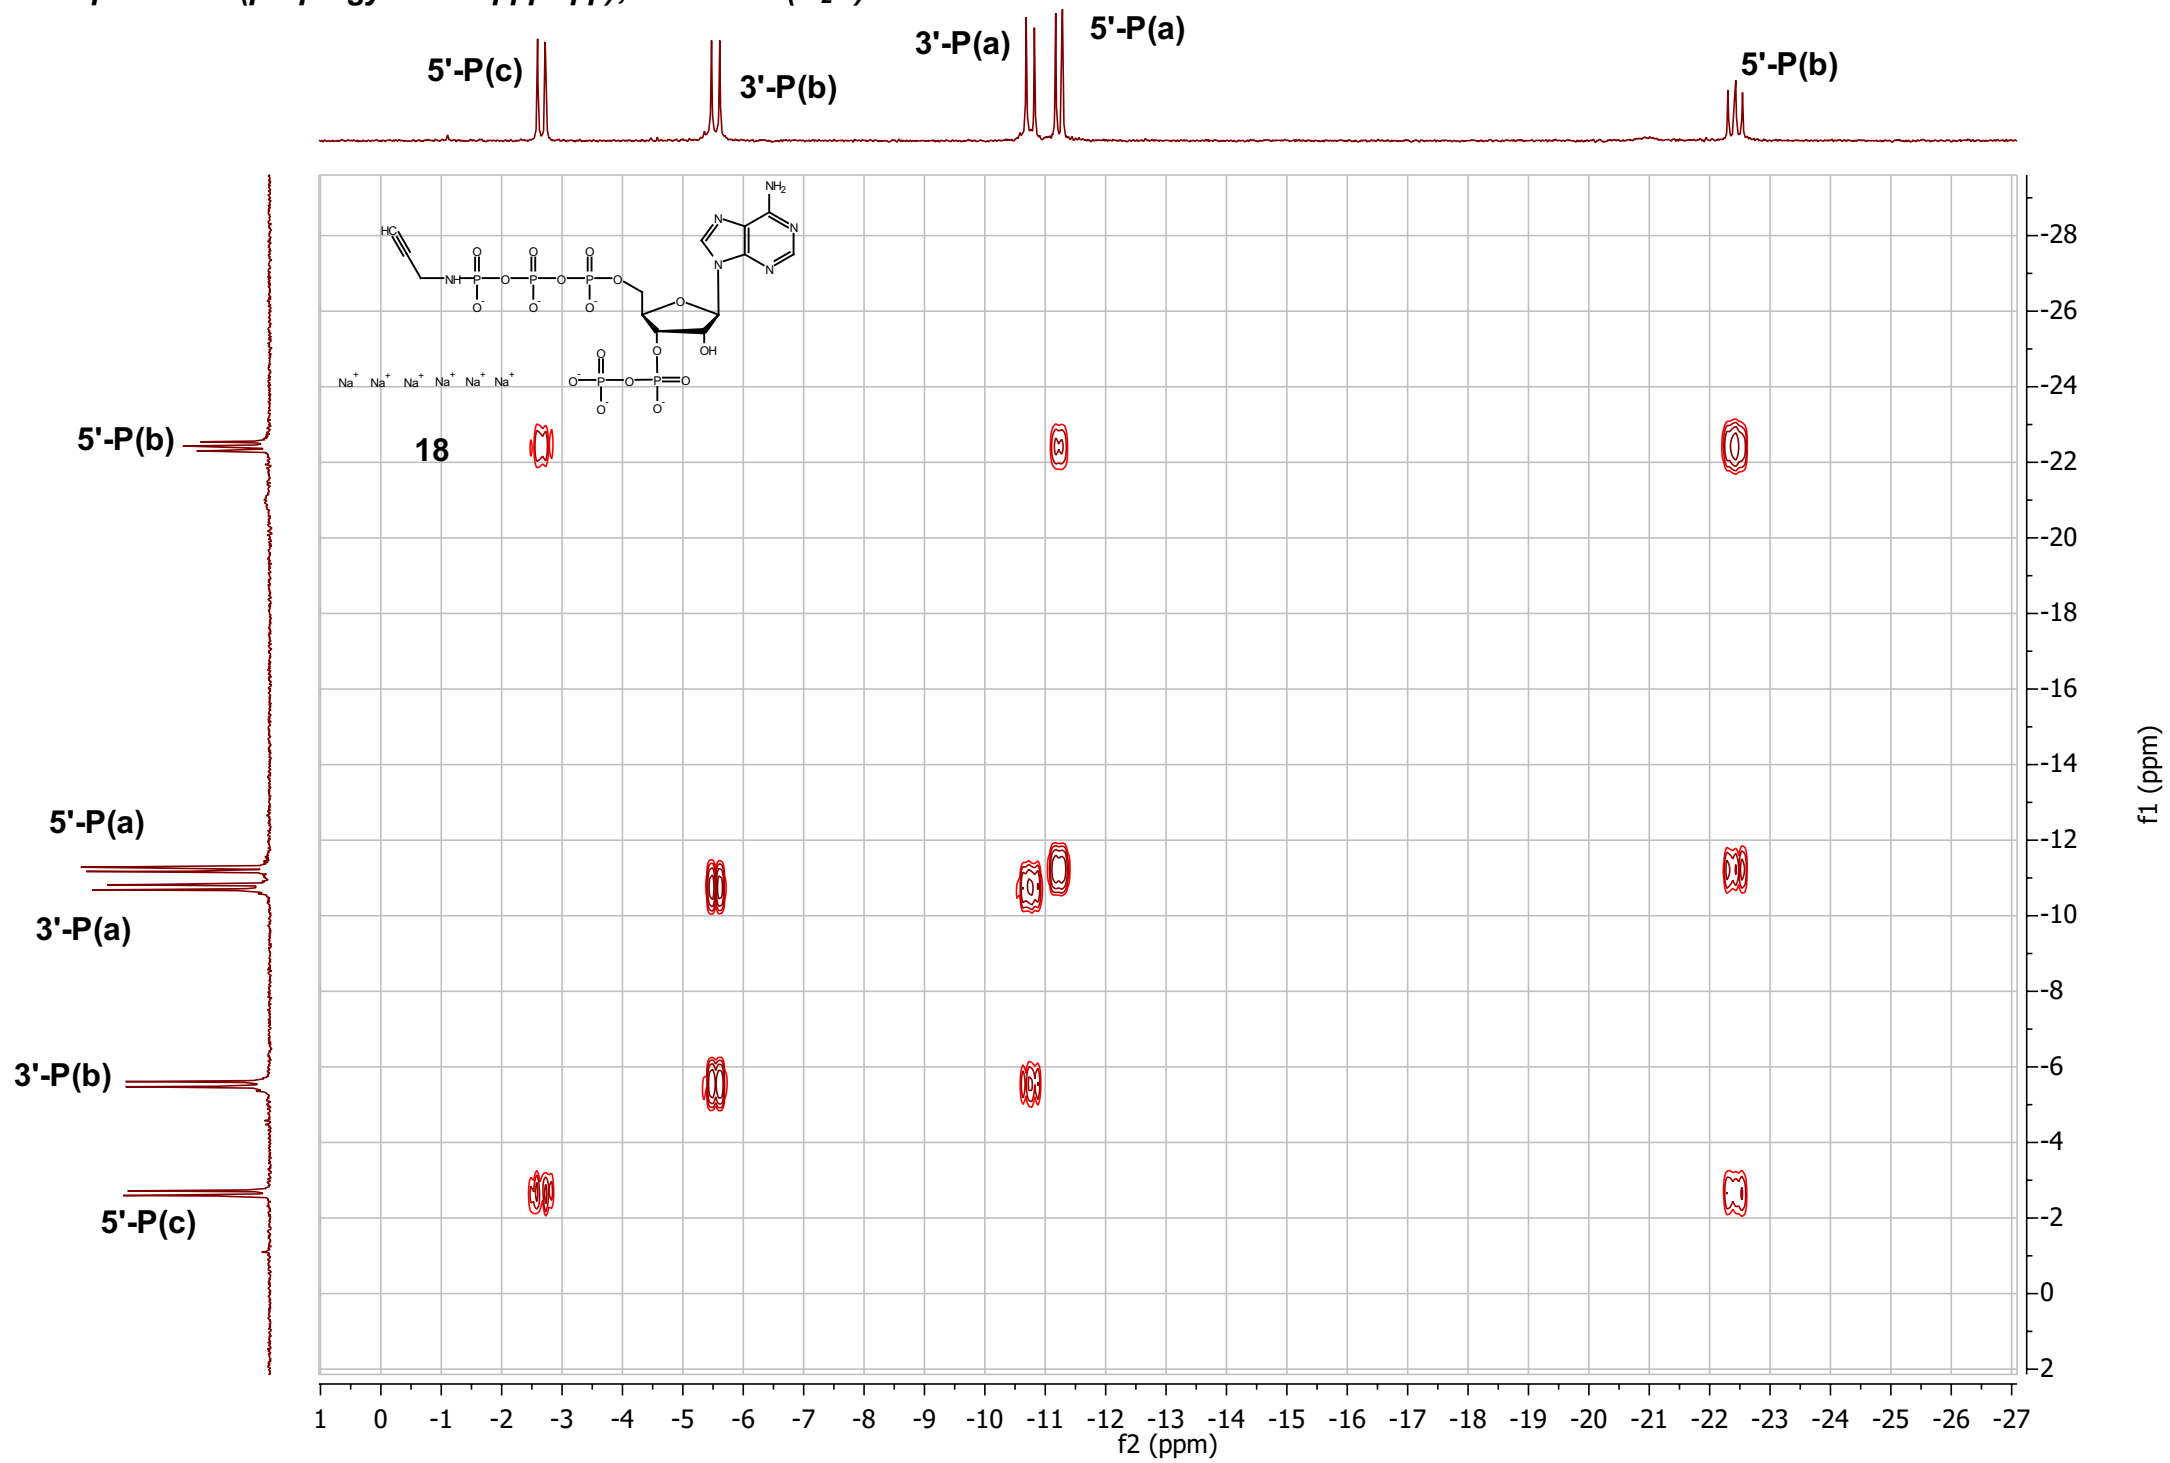

Compound 18 (propargylamido-pppApp), <sup>13</sup>C {<sup>1</sup>H} - NMR (D<sub>2</sub>O, 101 MHz)

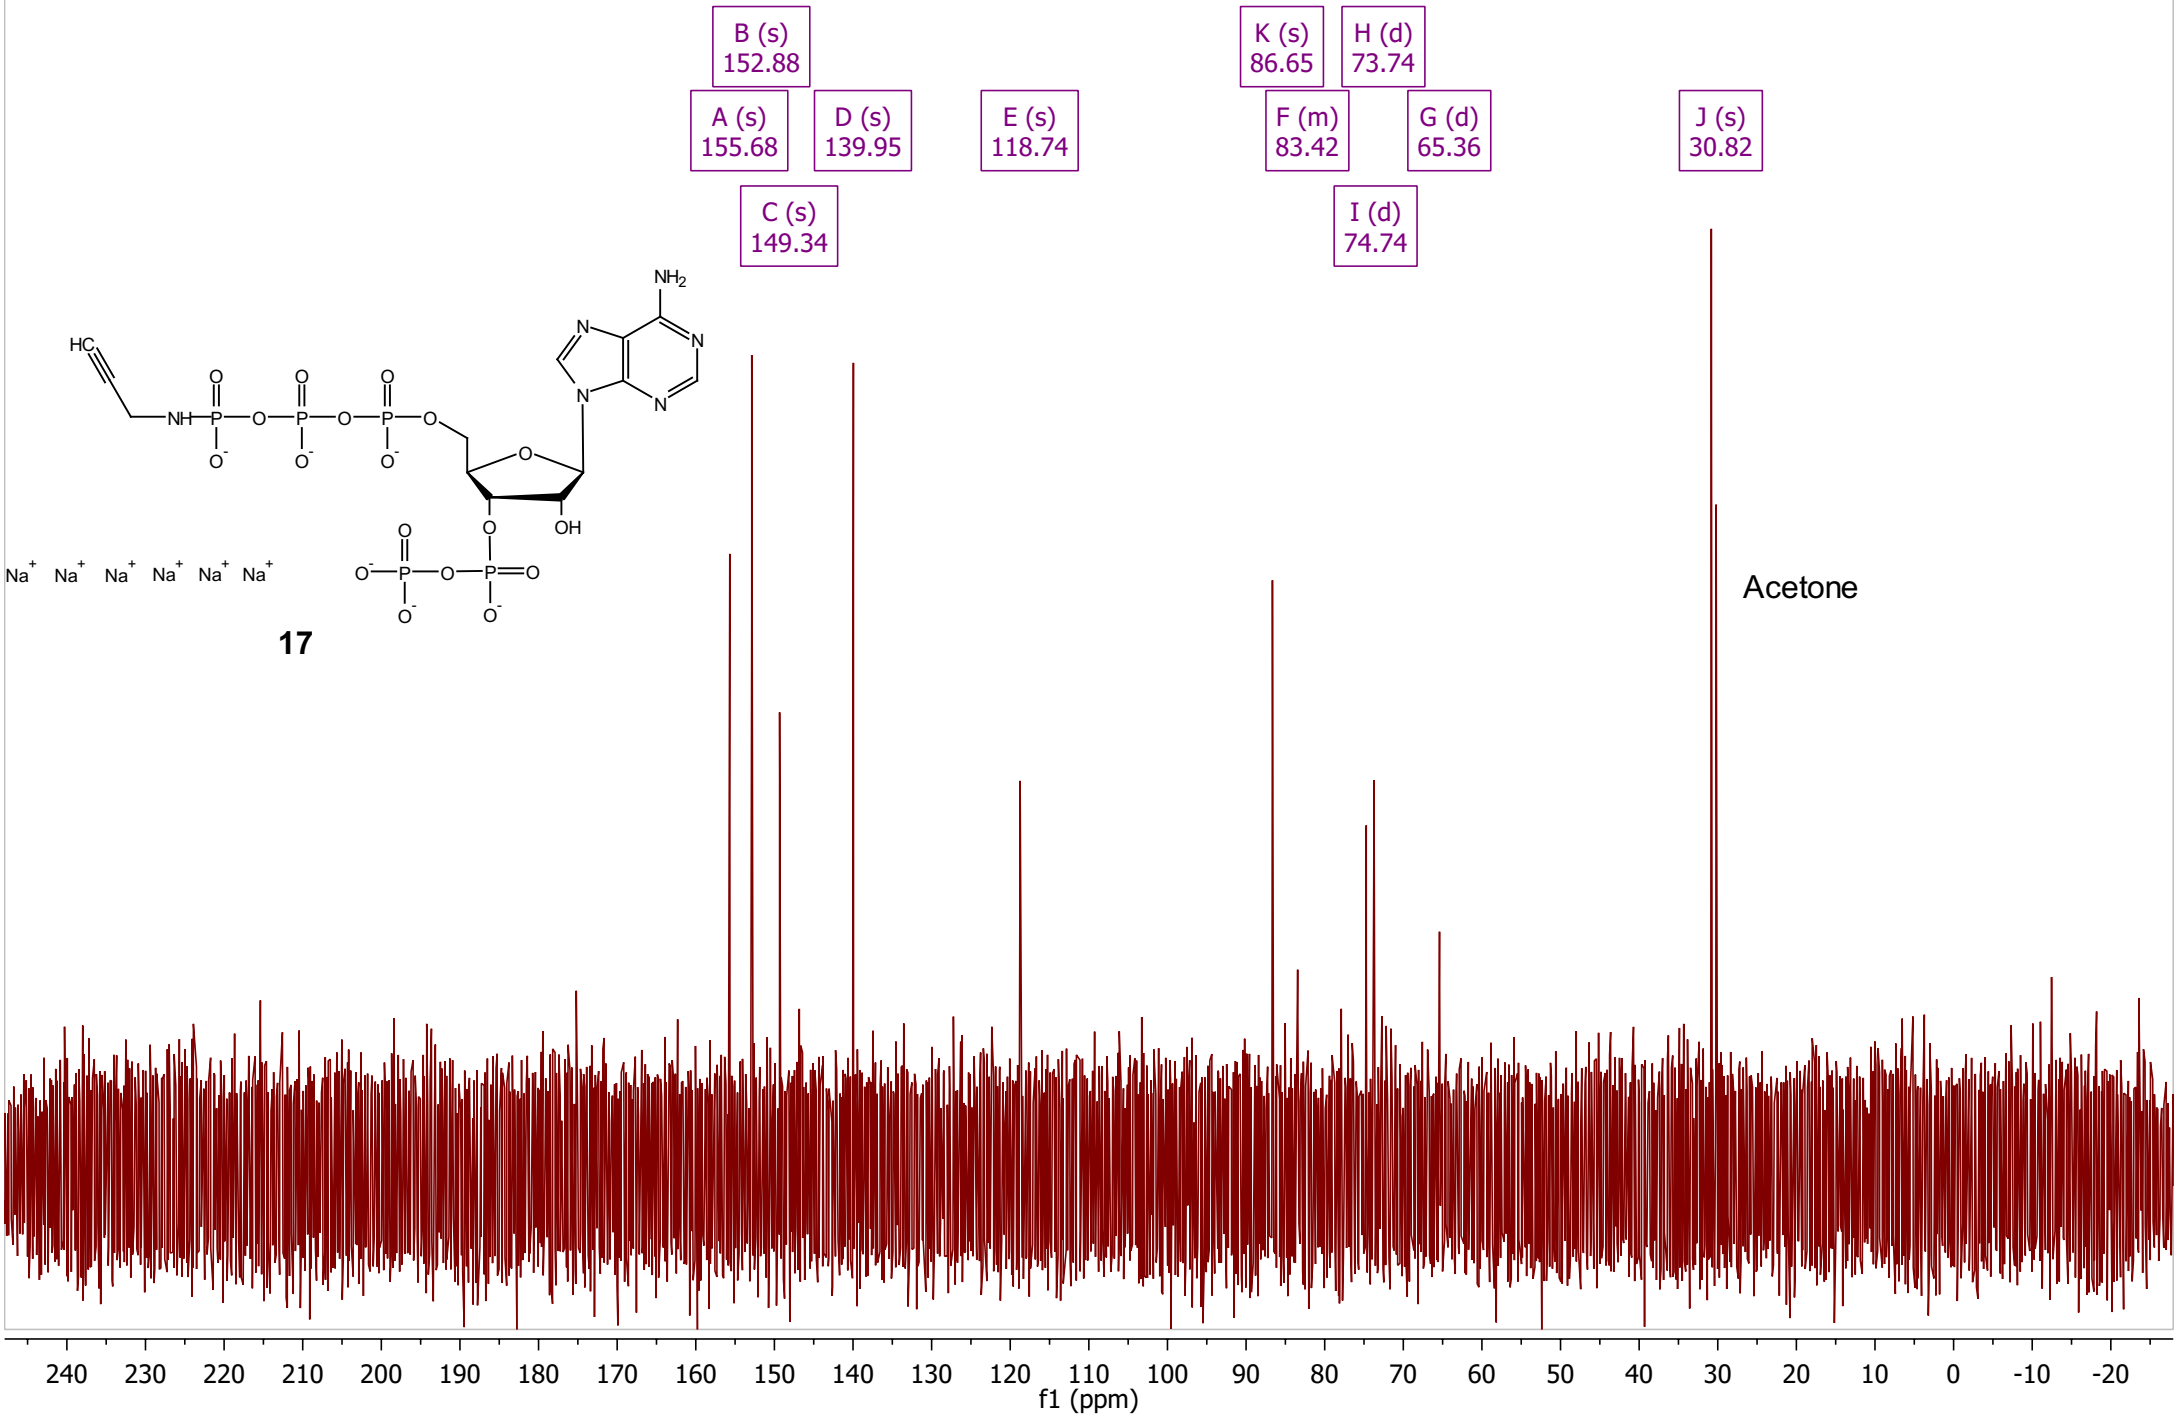

**Compound 19 (propargylamido-pppGpp), <sup>1</sup>H - NMR (D<sub>2</sub>O, 400 MHz)**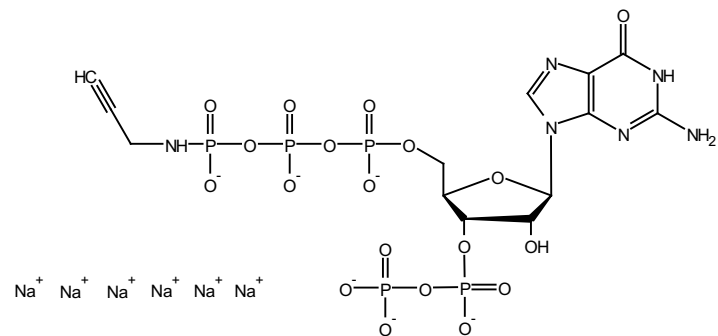**19**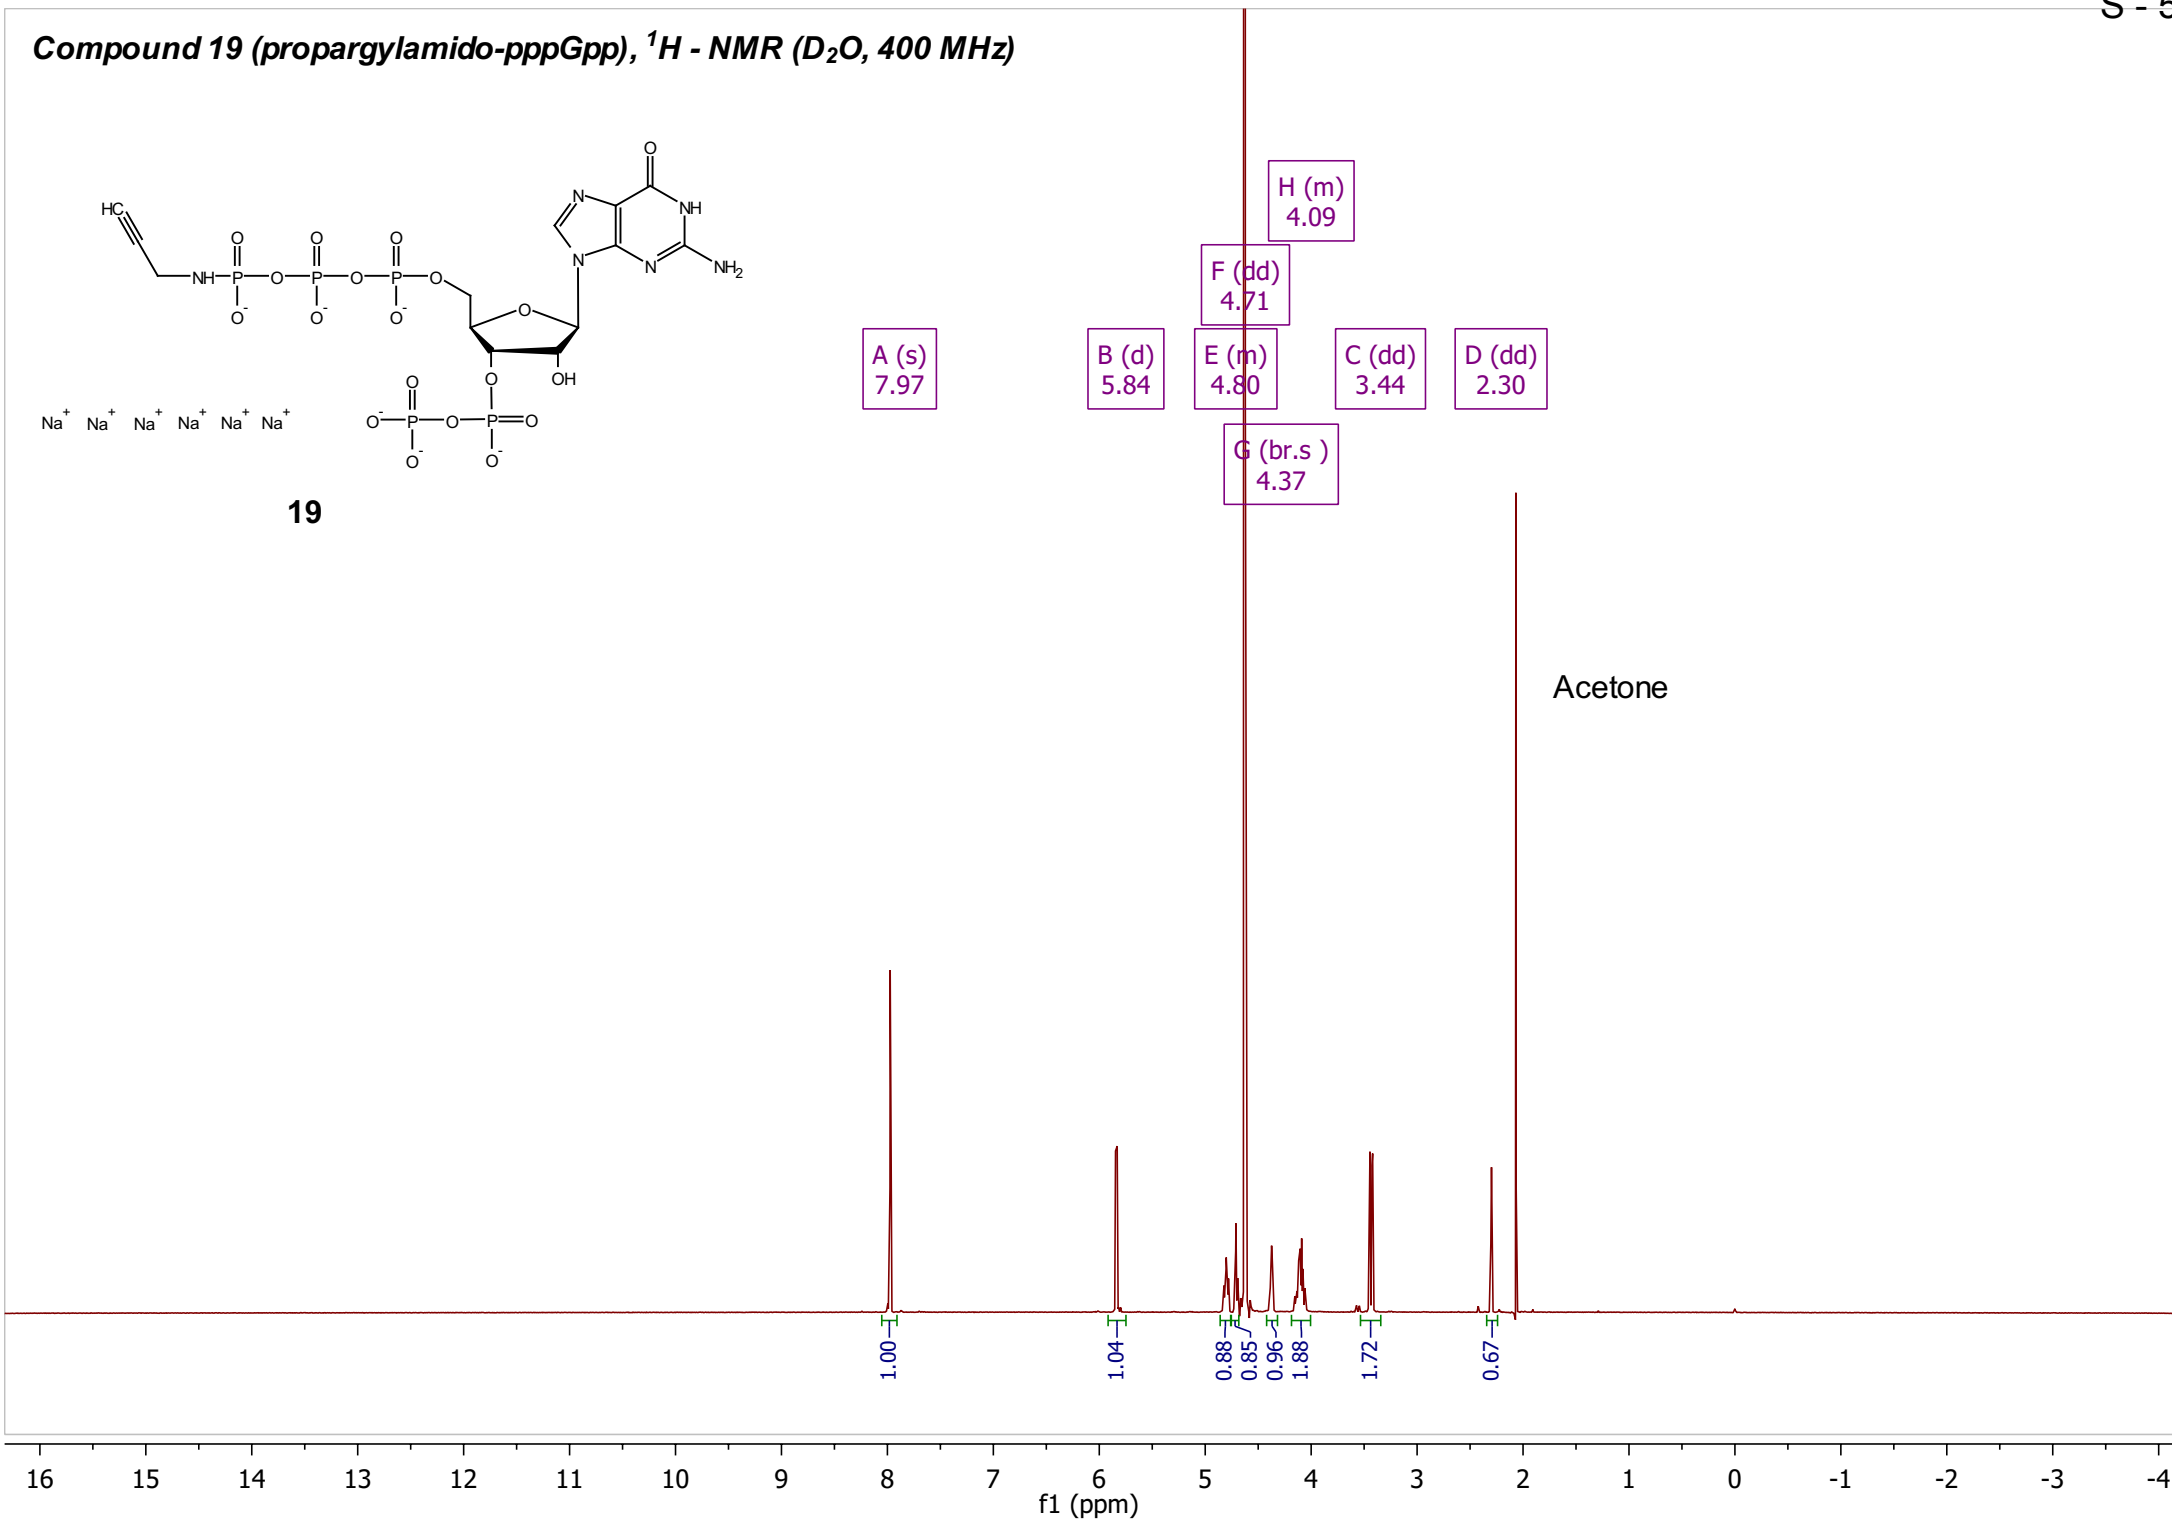

**Compound 19 (propargylamido-pppGpp),  $^1\text{H}$   $\{^{31}\text{P}\}$  - NMR ( $\text{D}_2\text{O}$ , 400 MHz)**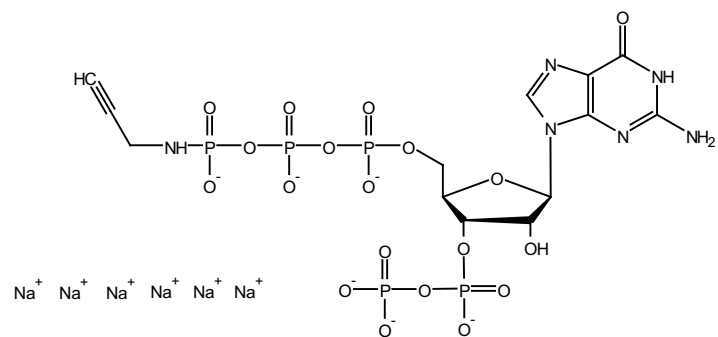**19**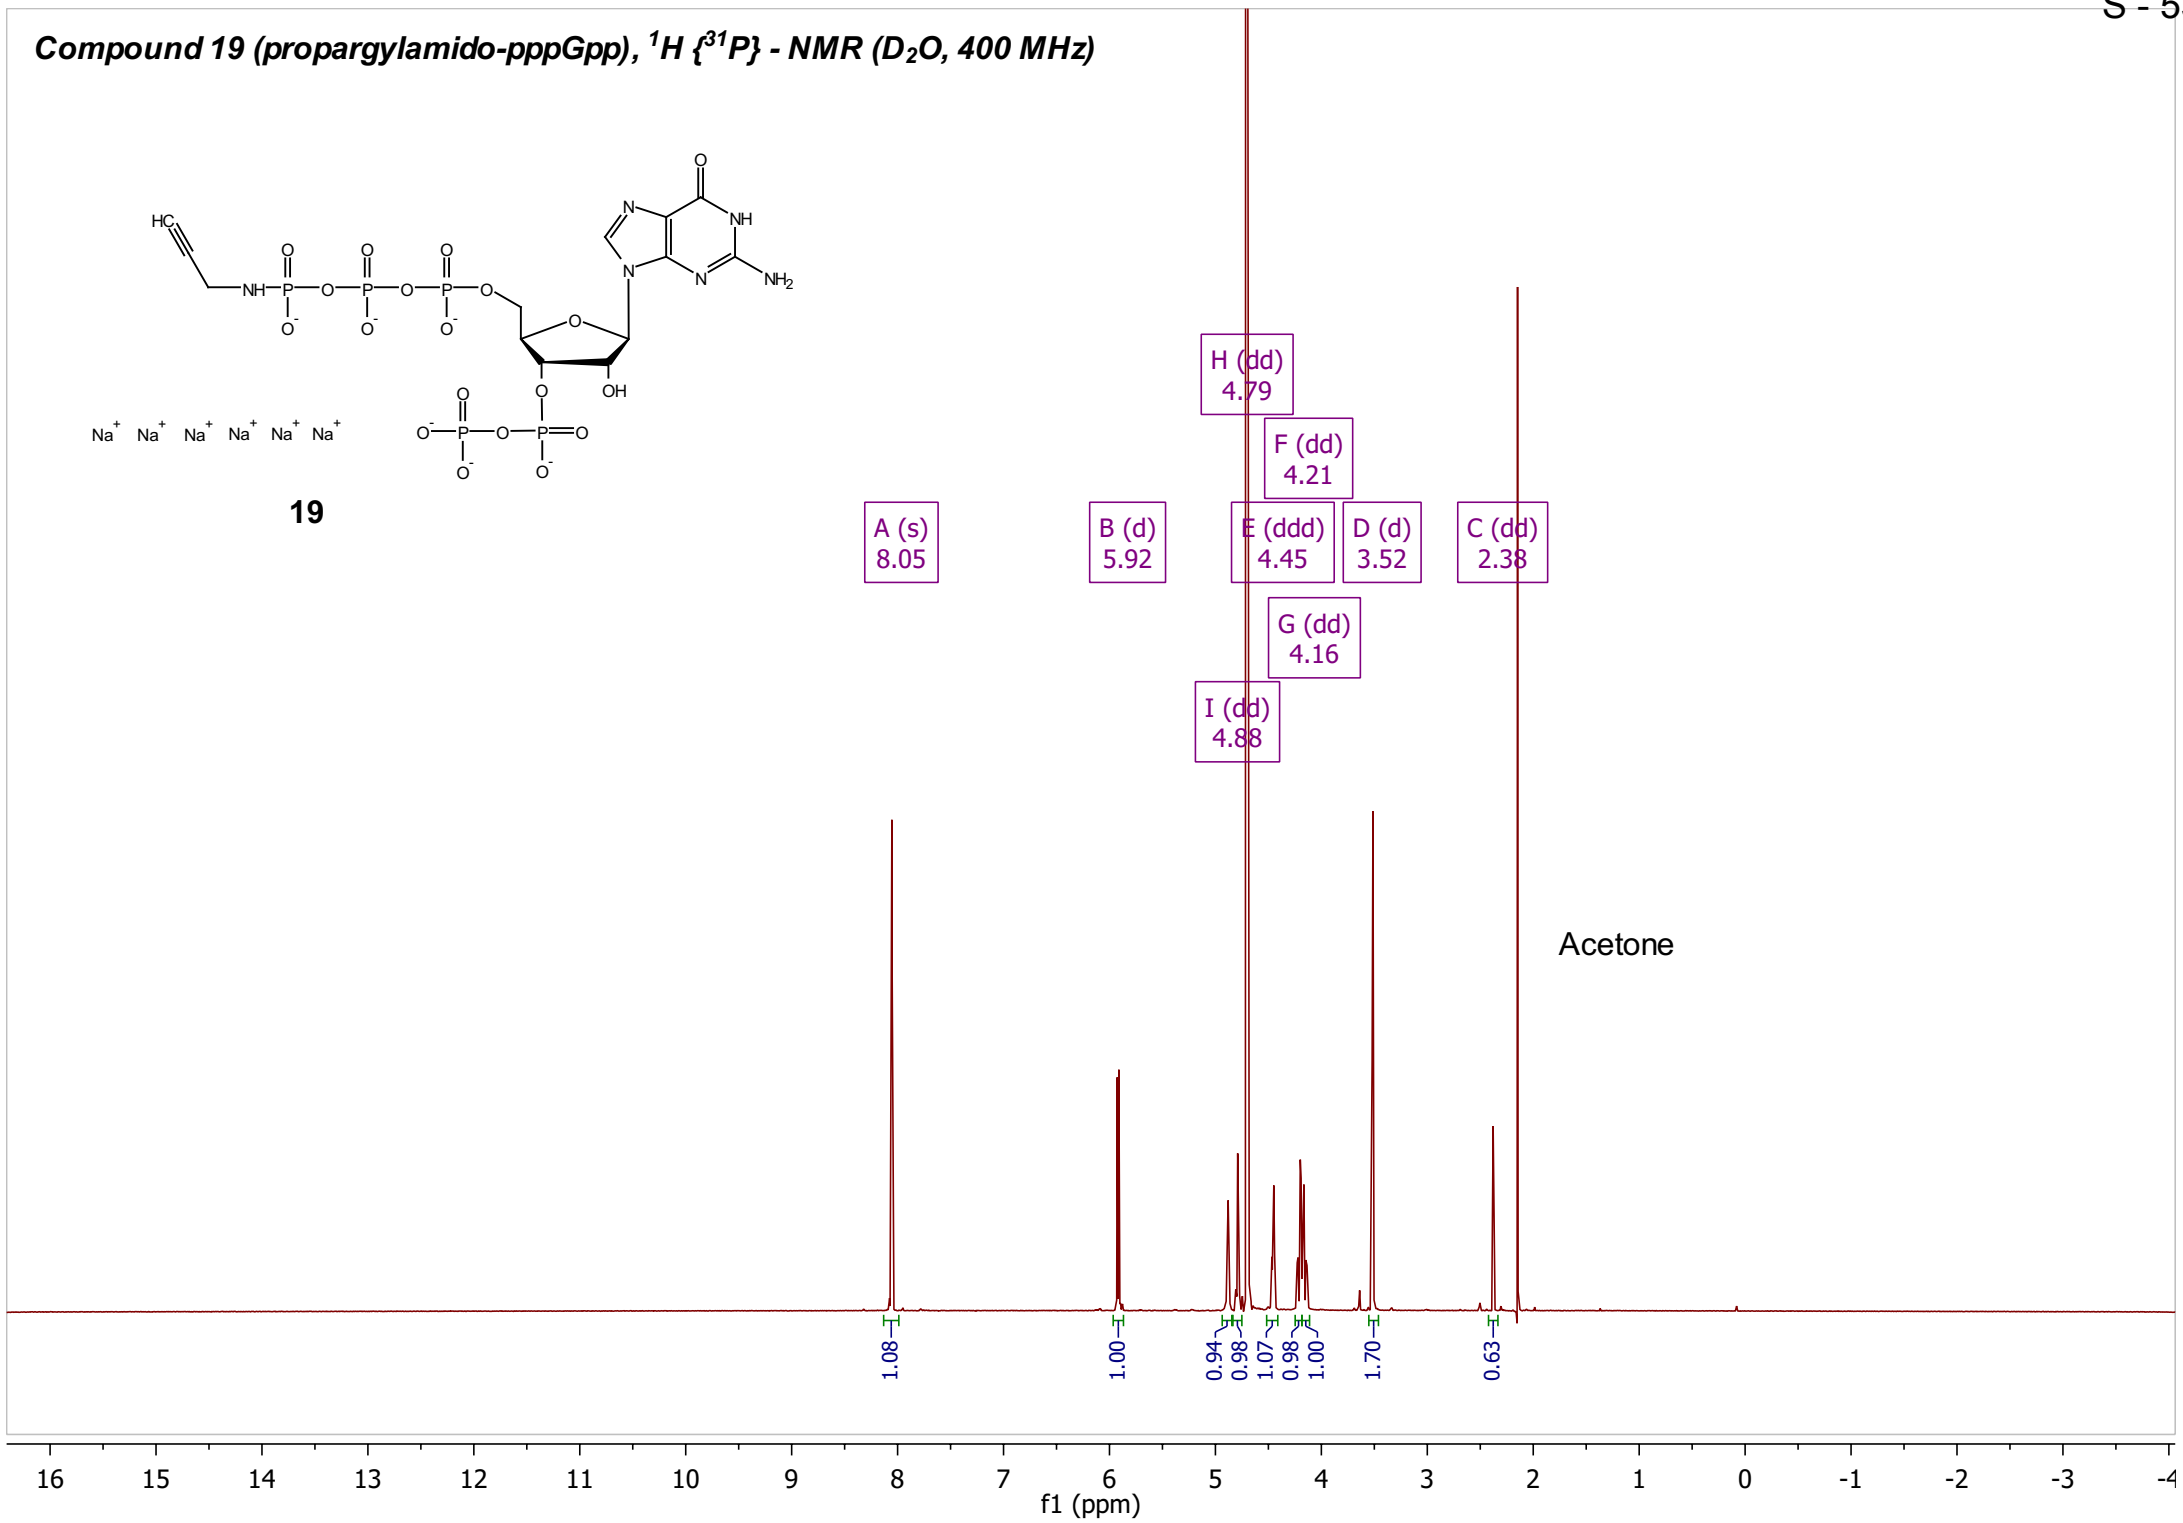

Compound 19 (propargylamido-pppGpp),  $^{31}\text{P}$   $\{^1\text{H}\}$  - NMR ( $\text{D}_2\text{O}$ , 162 MHz)

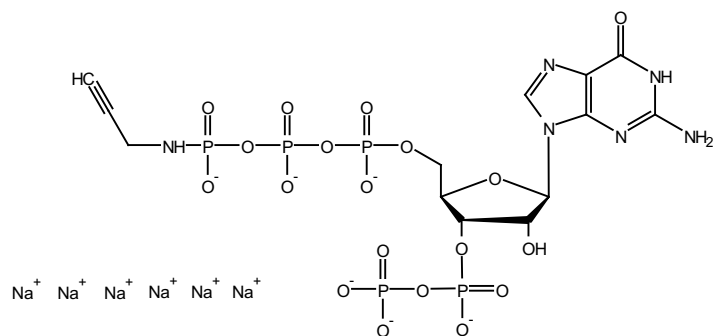

19

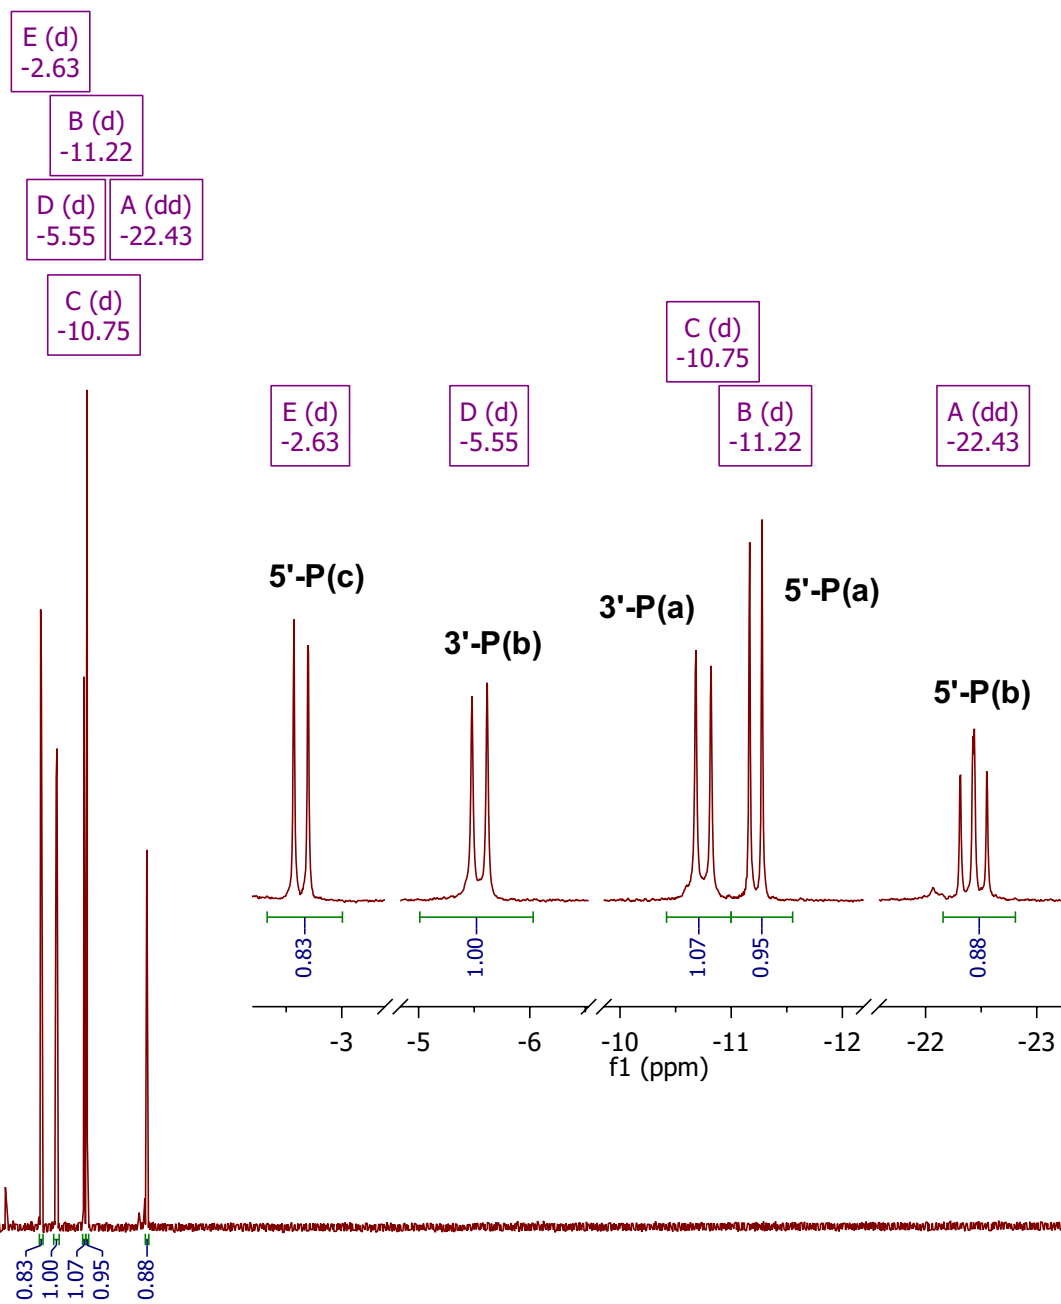

200 180 160 140 120 100 80 60 40 20 0 -20 -40 -60 -80 -100 -120 -140 -160 -180 -200

Compound 19 (propargylamido-pppGpp),  $^{31}\text{P}$  - NMR ( $\text{D}_2\text{O}$ , 162 MHz)E (ddd)  
-2.63D (d)  
-5.55C (dd)  
-10.75B (ddd)  
-11.22A (dd)  
-22.43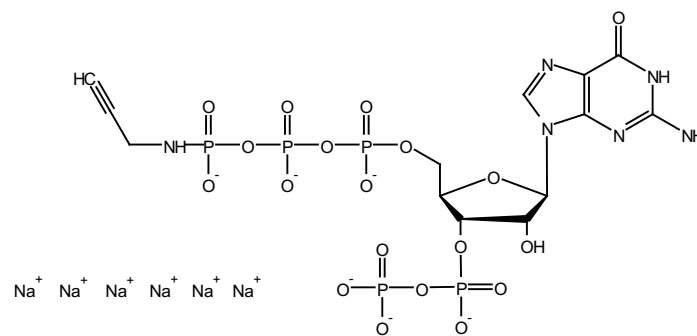

19

5'-P(b)

3'-P(b)

5'-P(c)

5'-P(a)

3'-P(a)

0.80

0.99

1.02

0.90

0.87

-1.5 -2.0 -2.5 -3.0 -5.0 -5.5 -6.0 -6.5 -10.0 -10.5 -11.0 -11.5 -12.0 -21.5 -22.0 -22.5 -23.0 -23.5 -24.0  
f1 (ppm)



Compound 19 (propargylamido-pppGpp), DQF-COSY (D<sub>2</sub>O)

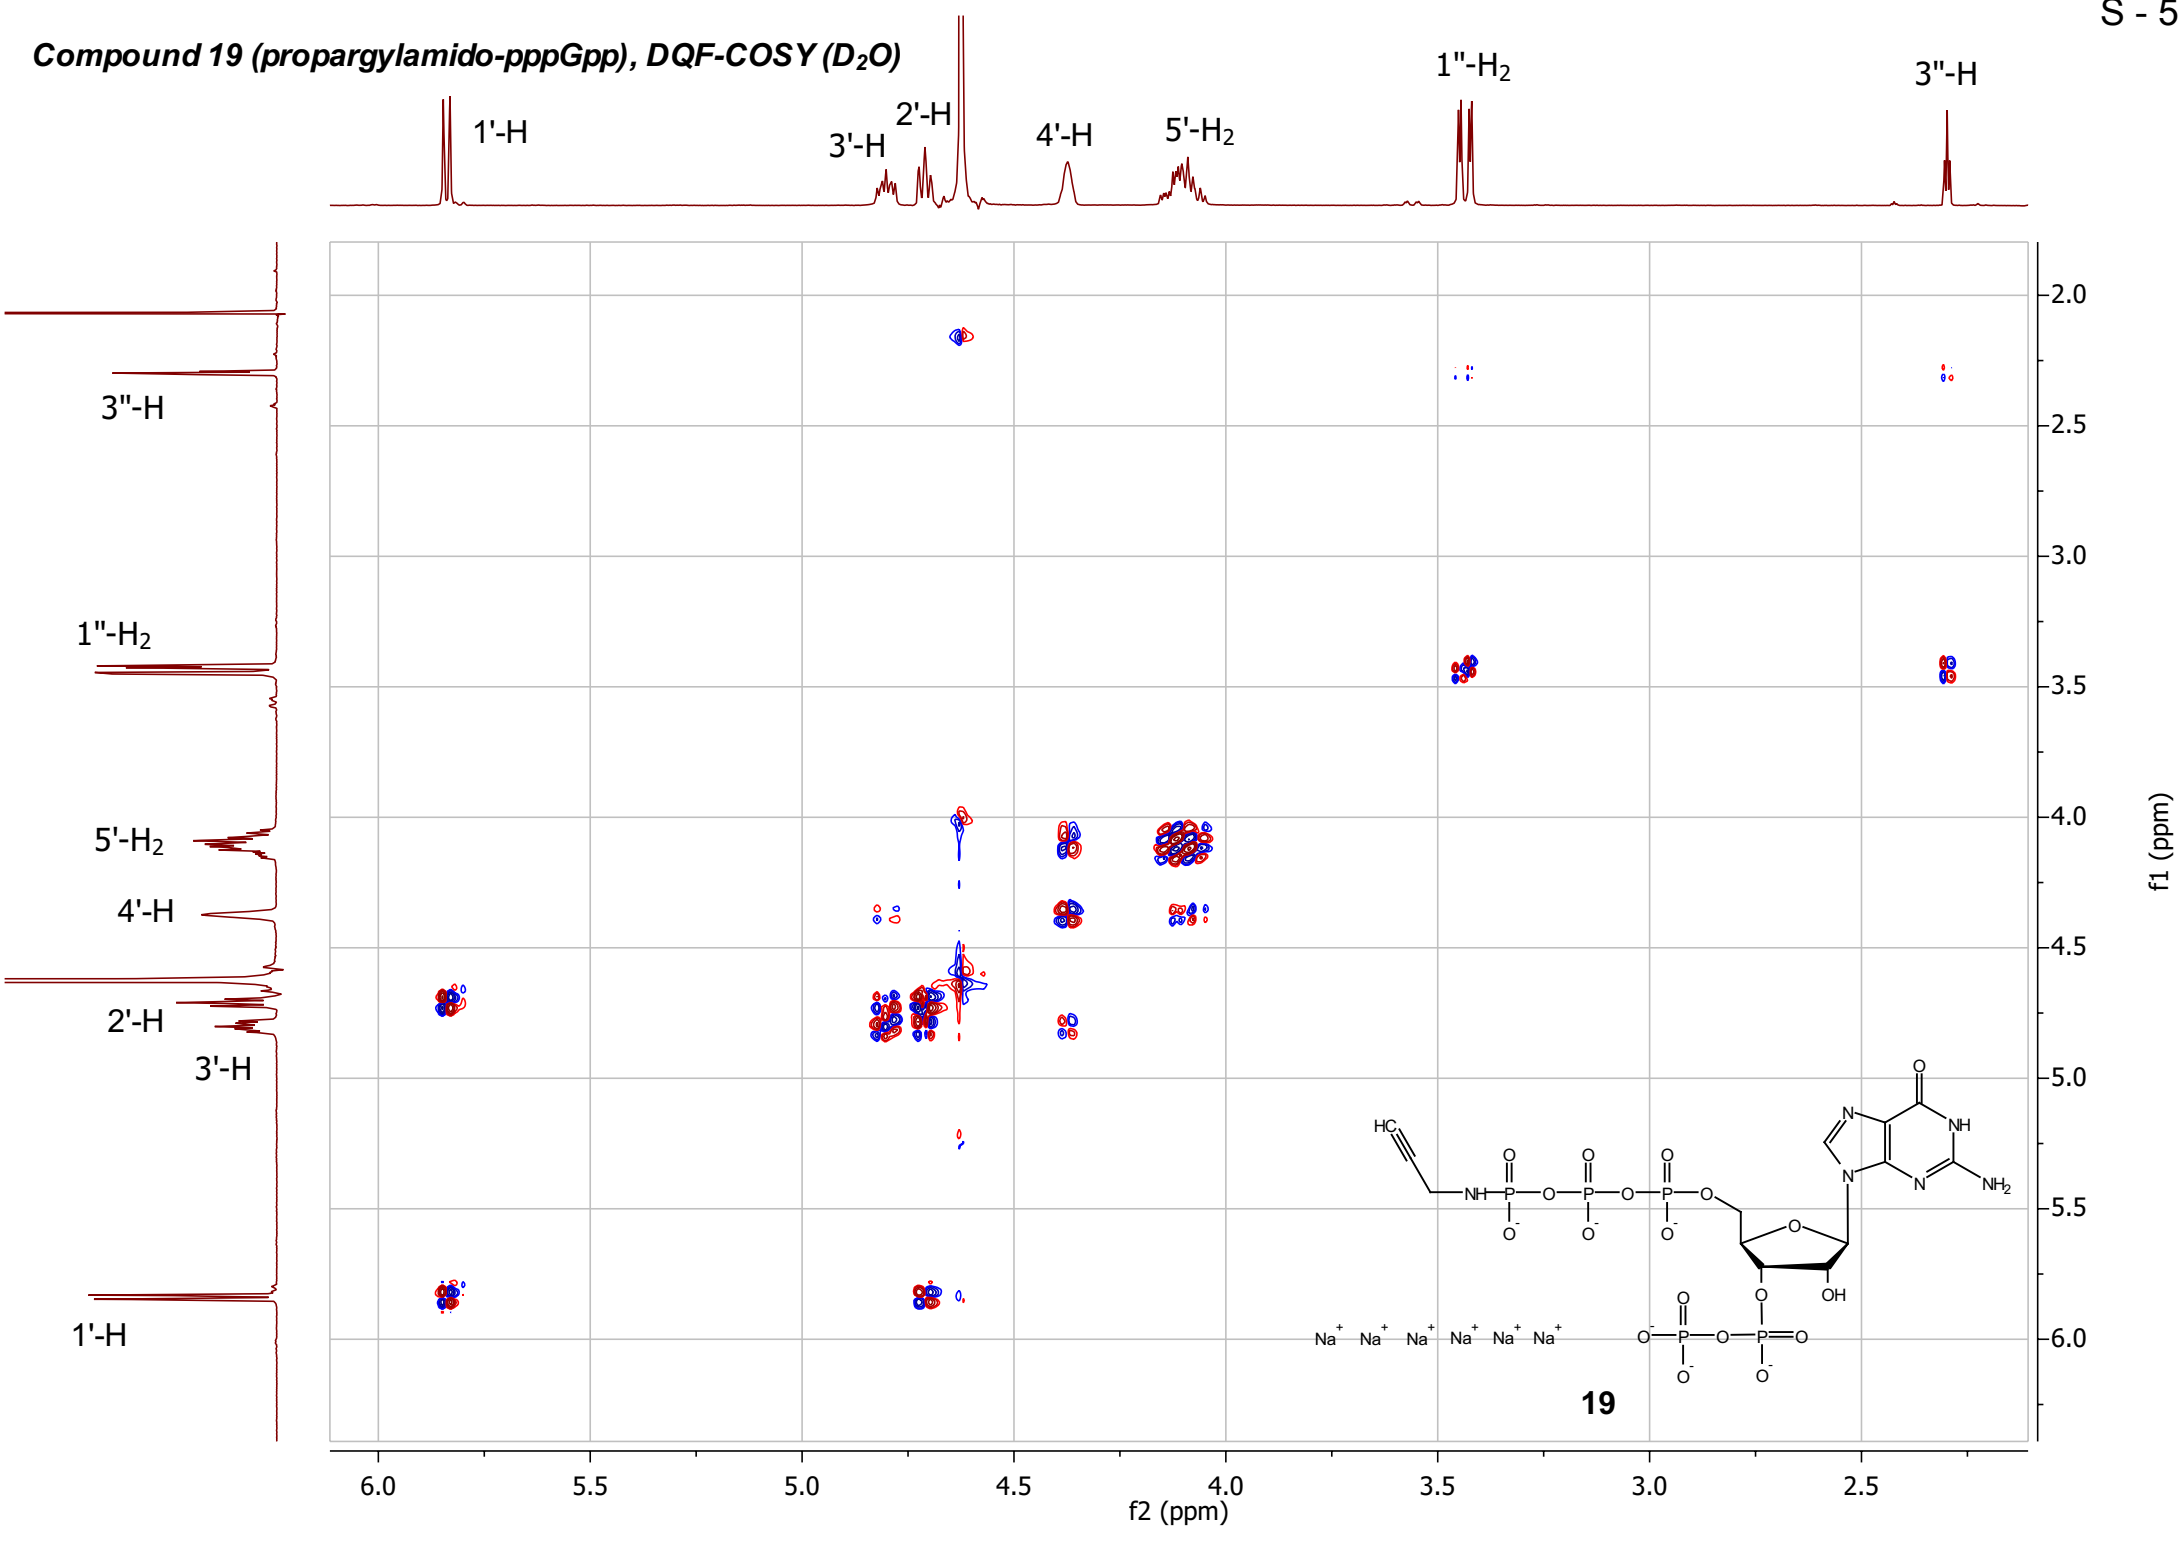

Compound 19 (propargylamido-pppGpp), HSQC (D<sub>2</sub>O)

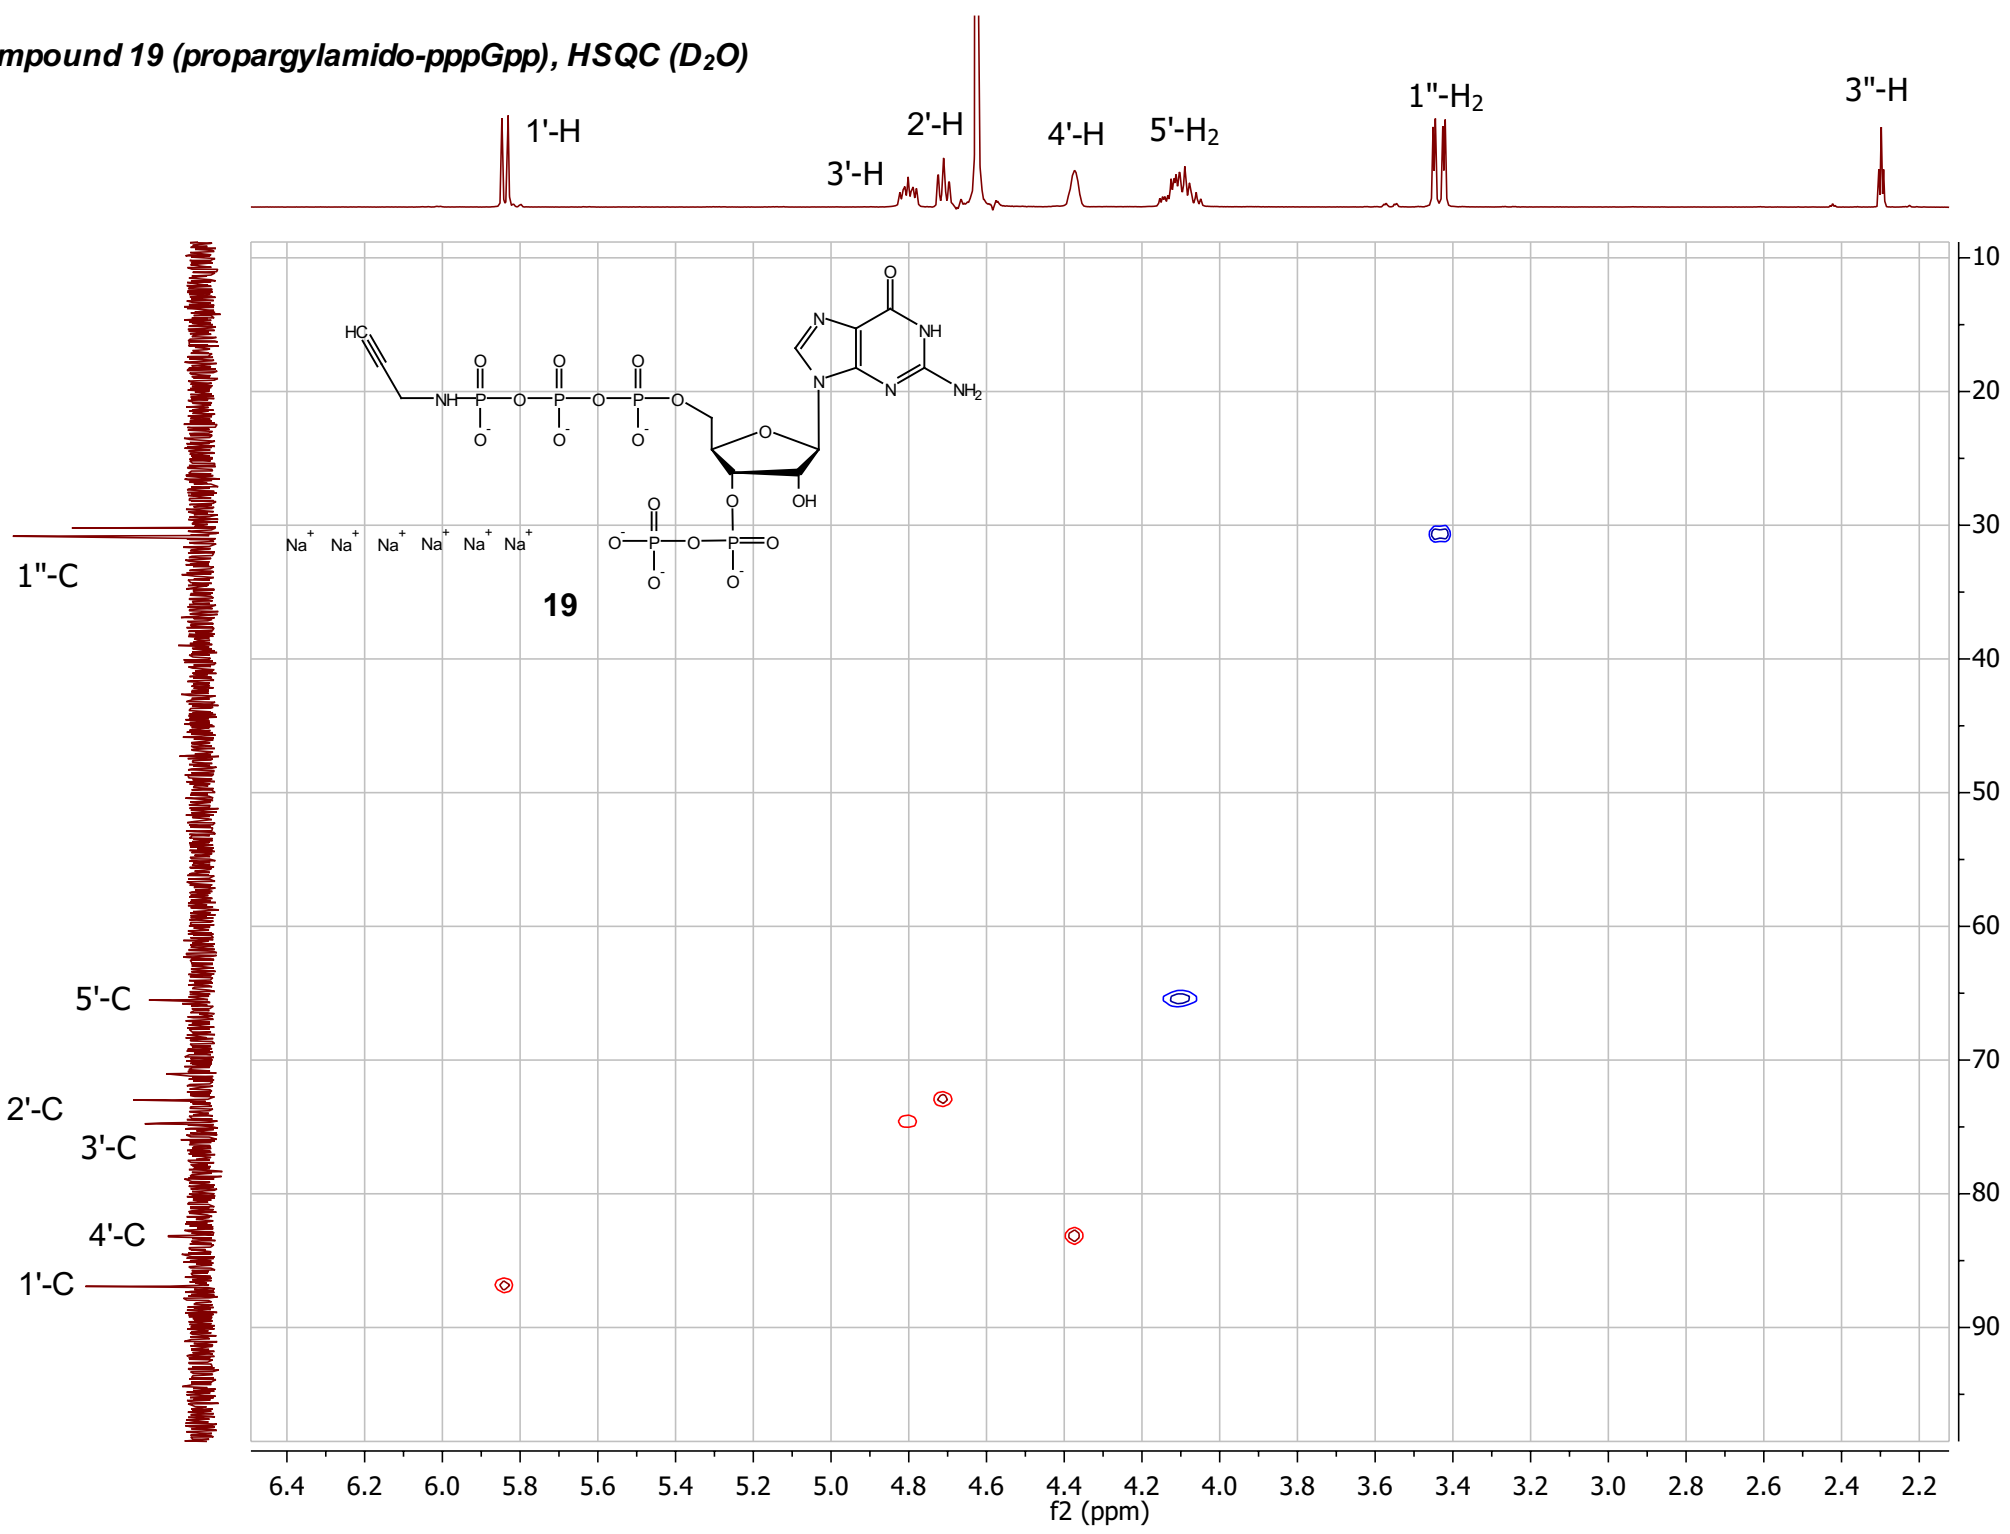

Compound 19 (propargylamido-pppGpp),  $^1\text{H} - ^{31}\text{P} - \text{HMBC} (\text{D}_2\text{O})$ 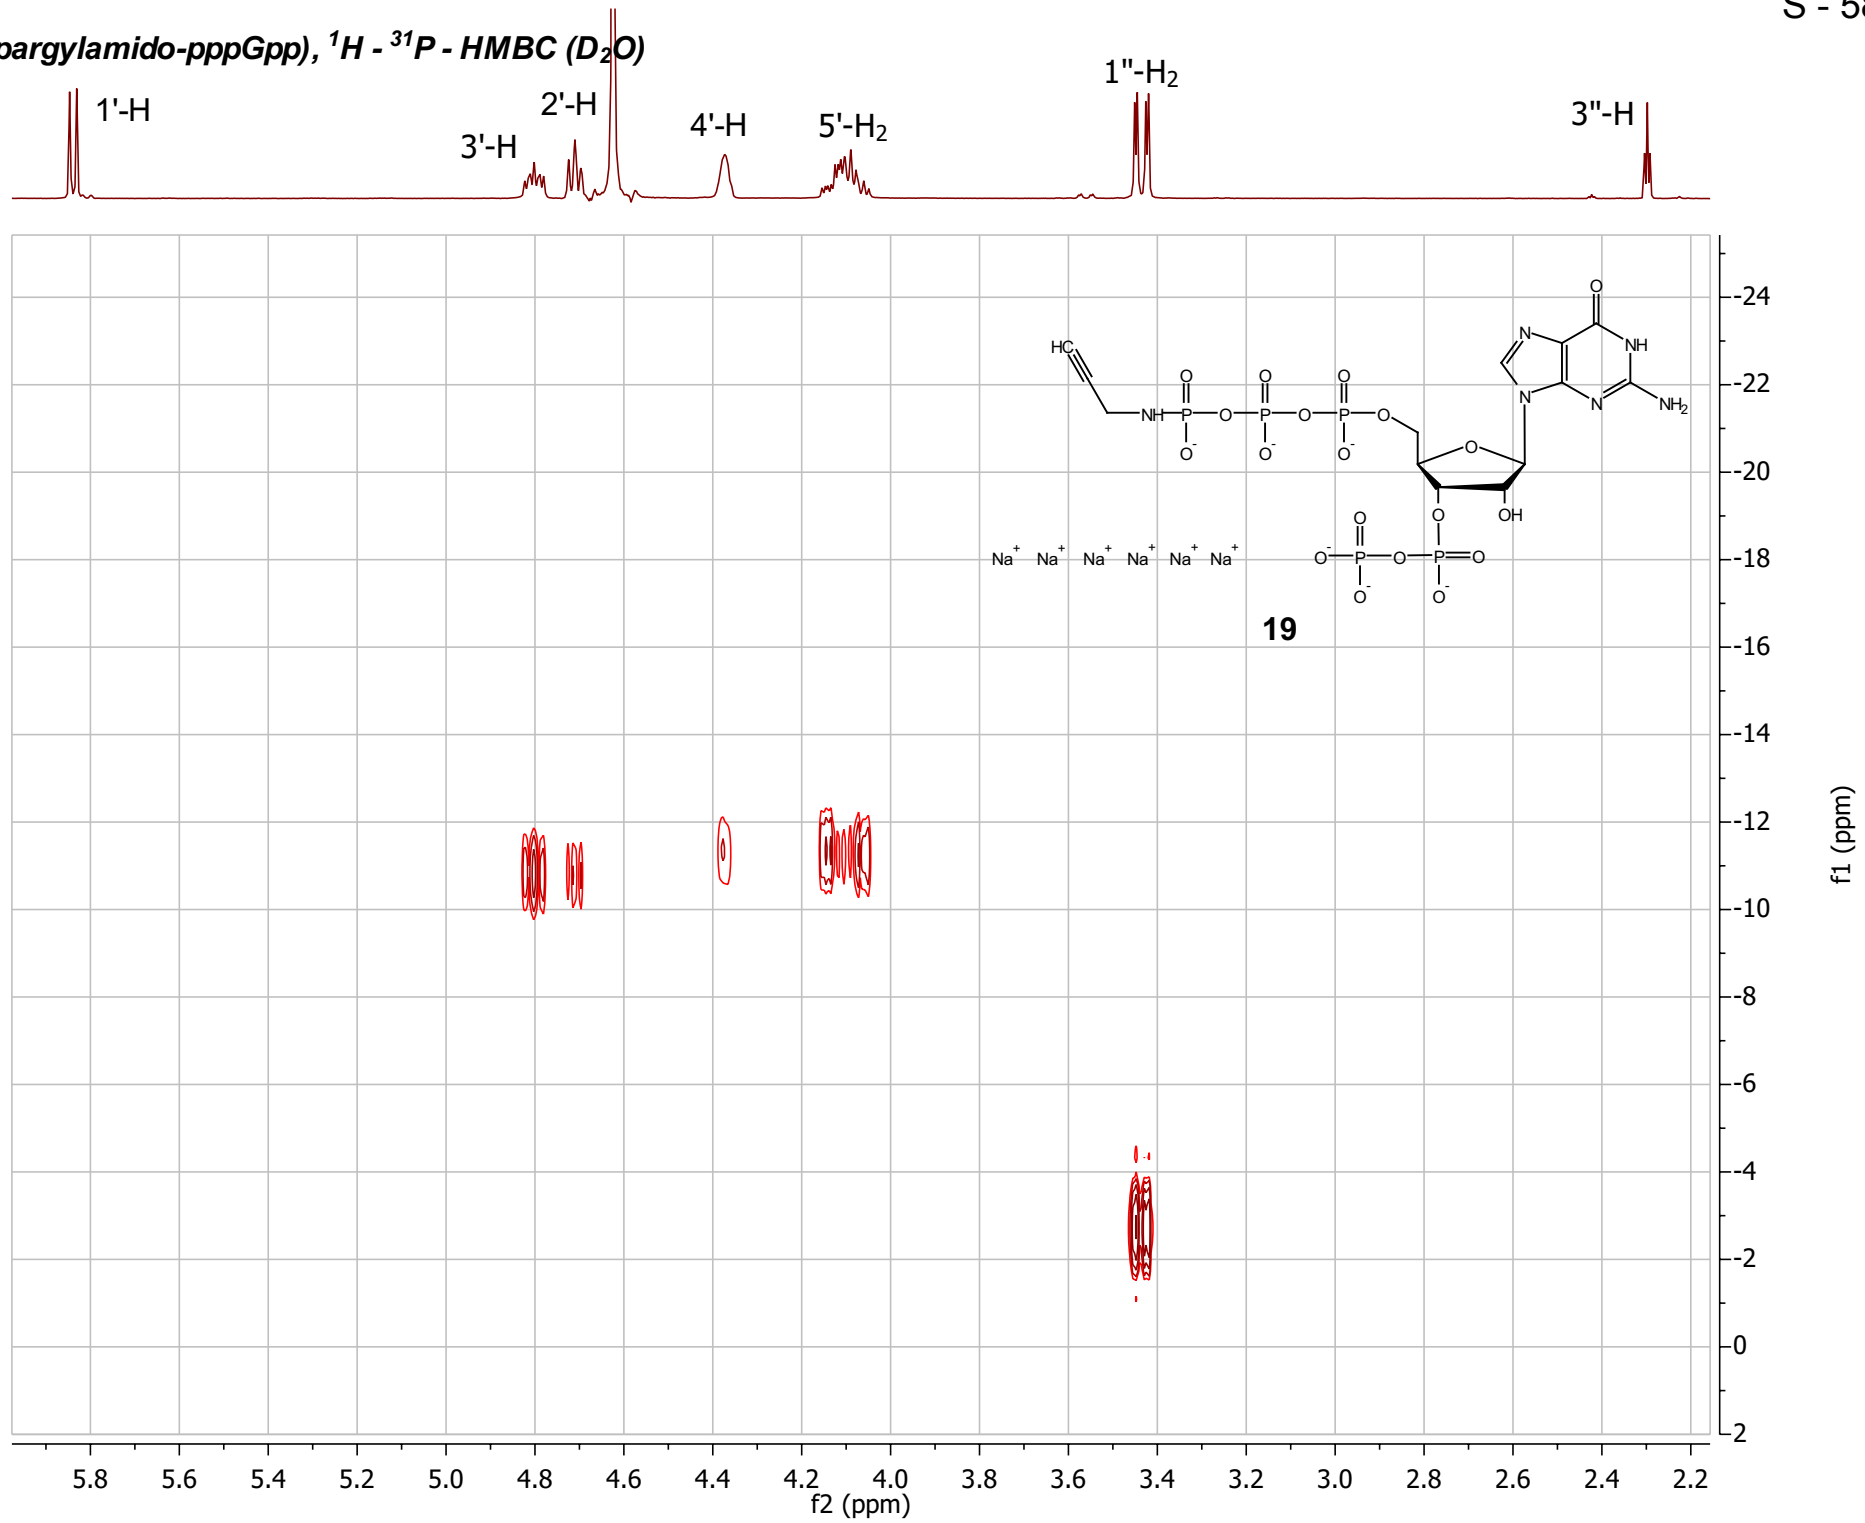



**Compound 19 (propargylamido-pppGpp),  $^{13}\text{C}$   $\{^1\text{H}\}$  - NMR ( $\text{D}_2\text{O}$ , 400 MHz)**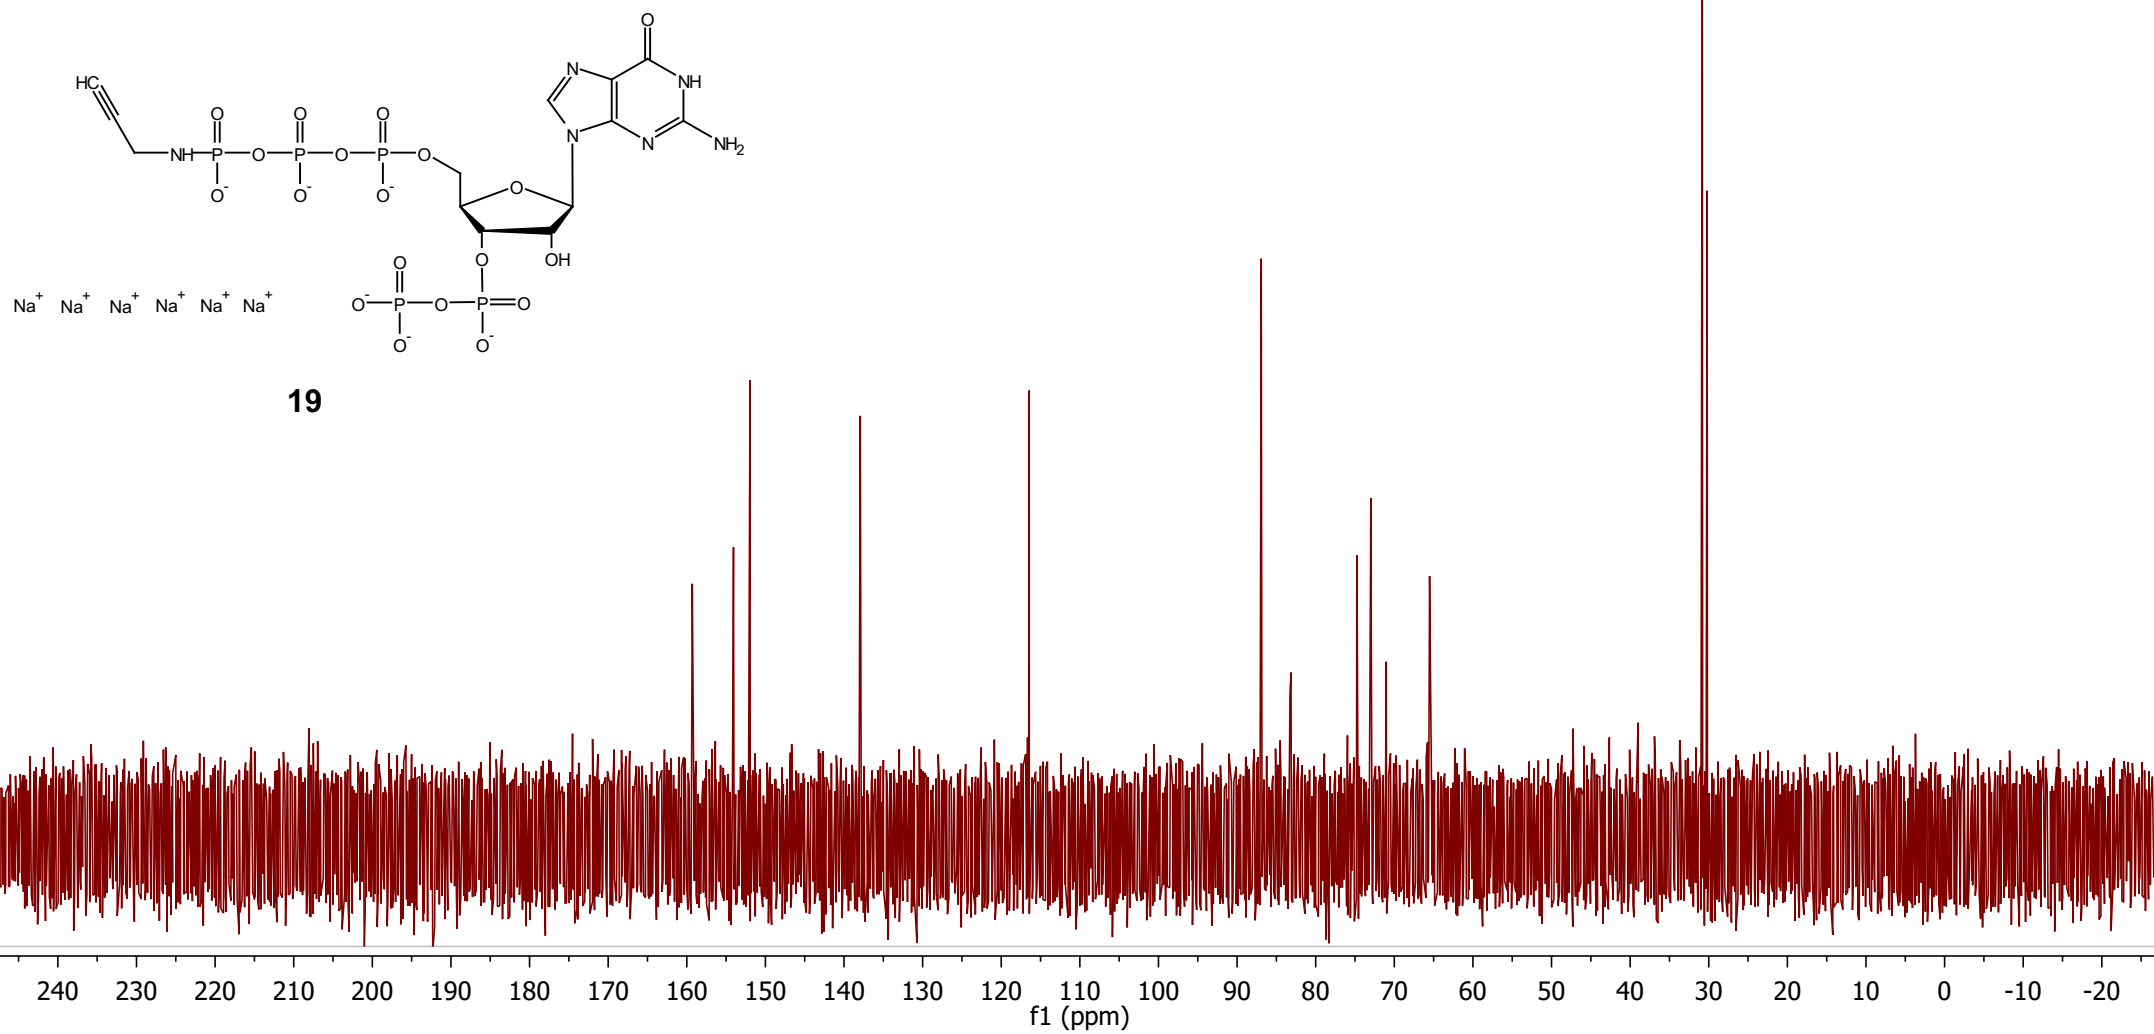

Compound 20 (amido-pppApp), <sup>1</sup>H - NMR (D<sub>2</sub>O, 400 MHz)

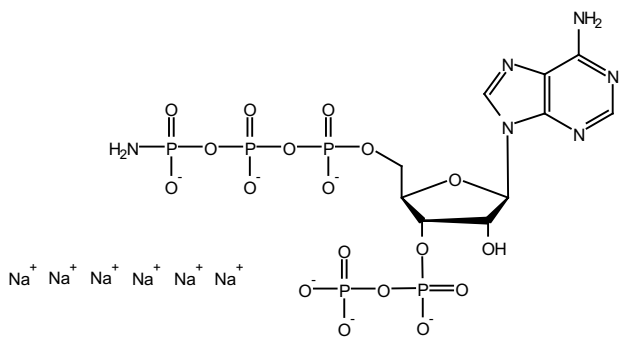

20

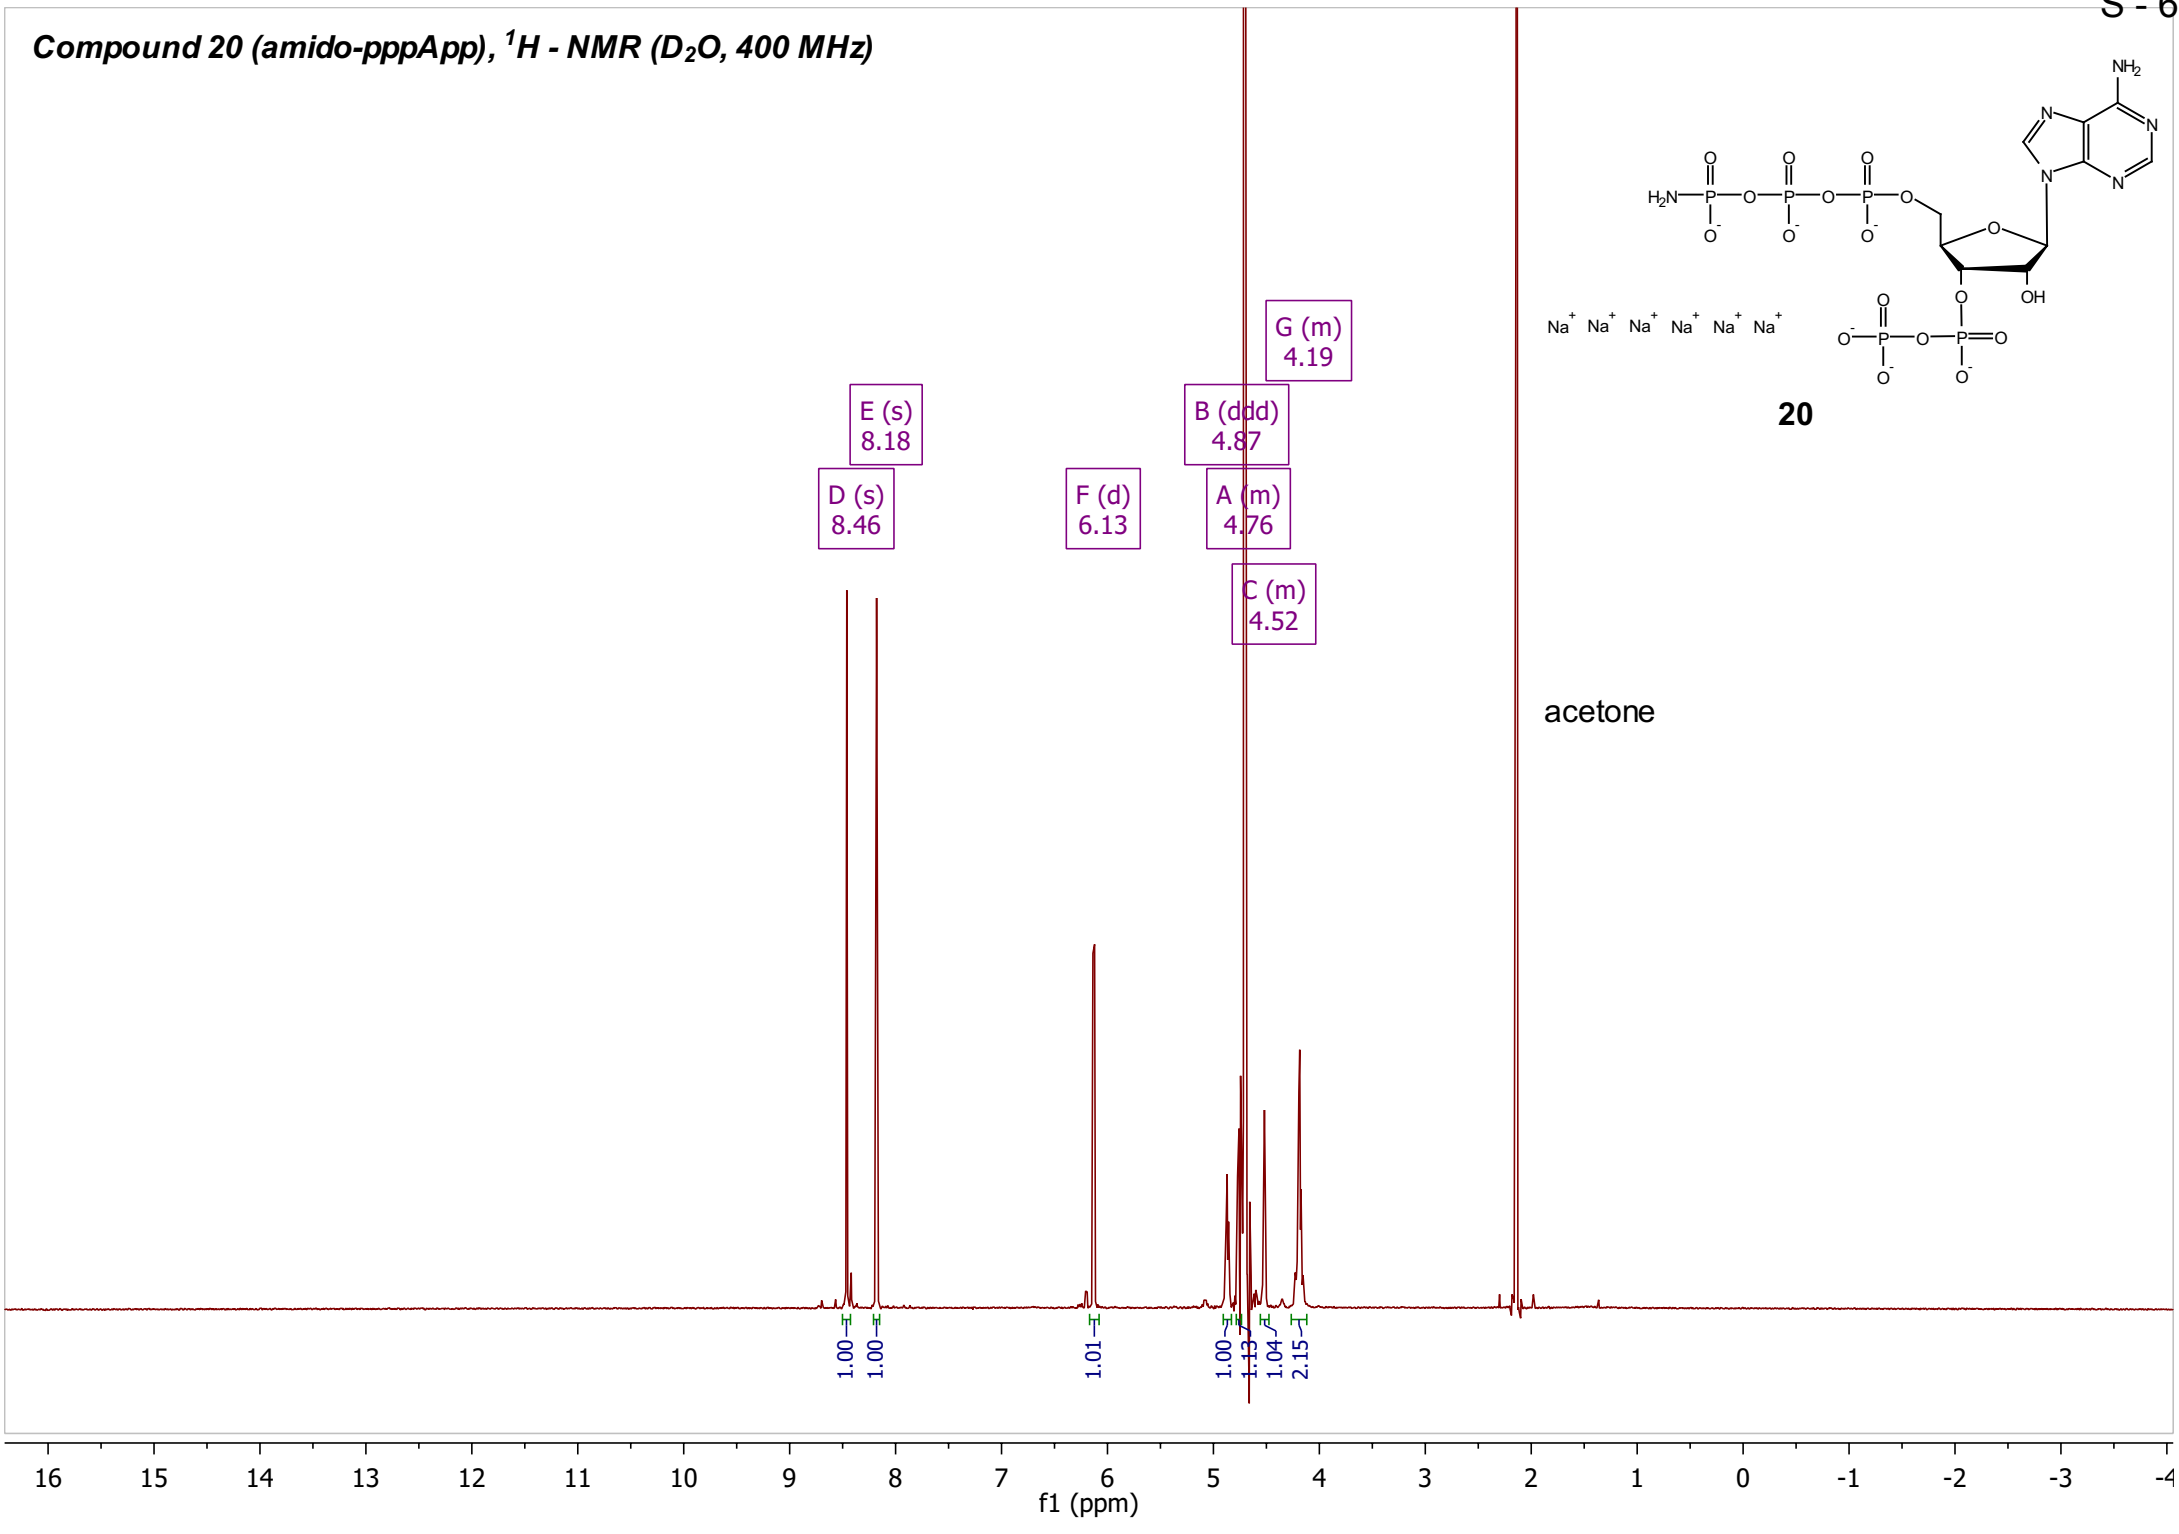

Compound 20 (amido-pppApp),  $^1\text{H}$   $\{^3\text{1P}\}$  - NMR ( $\text{D}_2\text{O}$ , 400 MHz)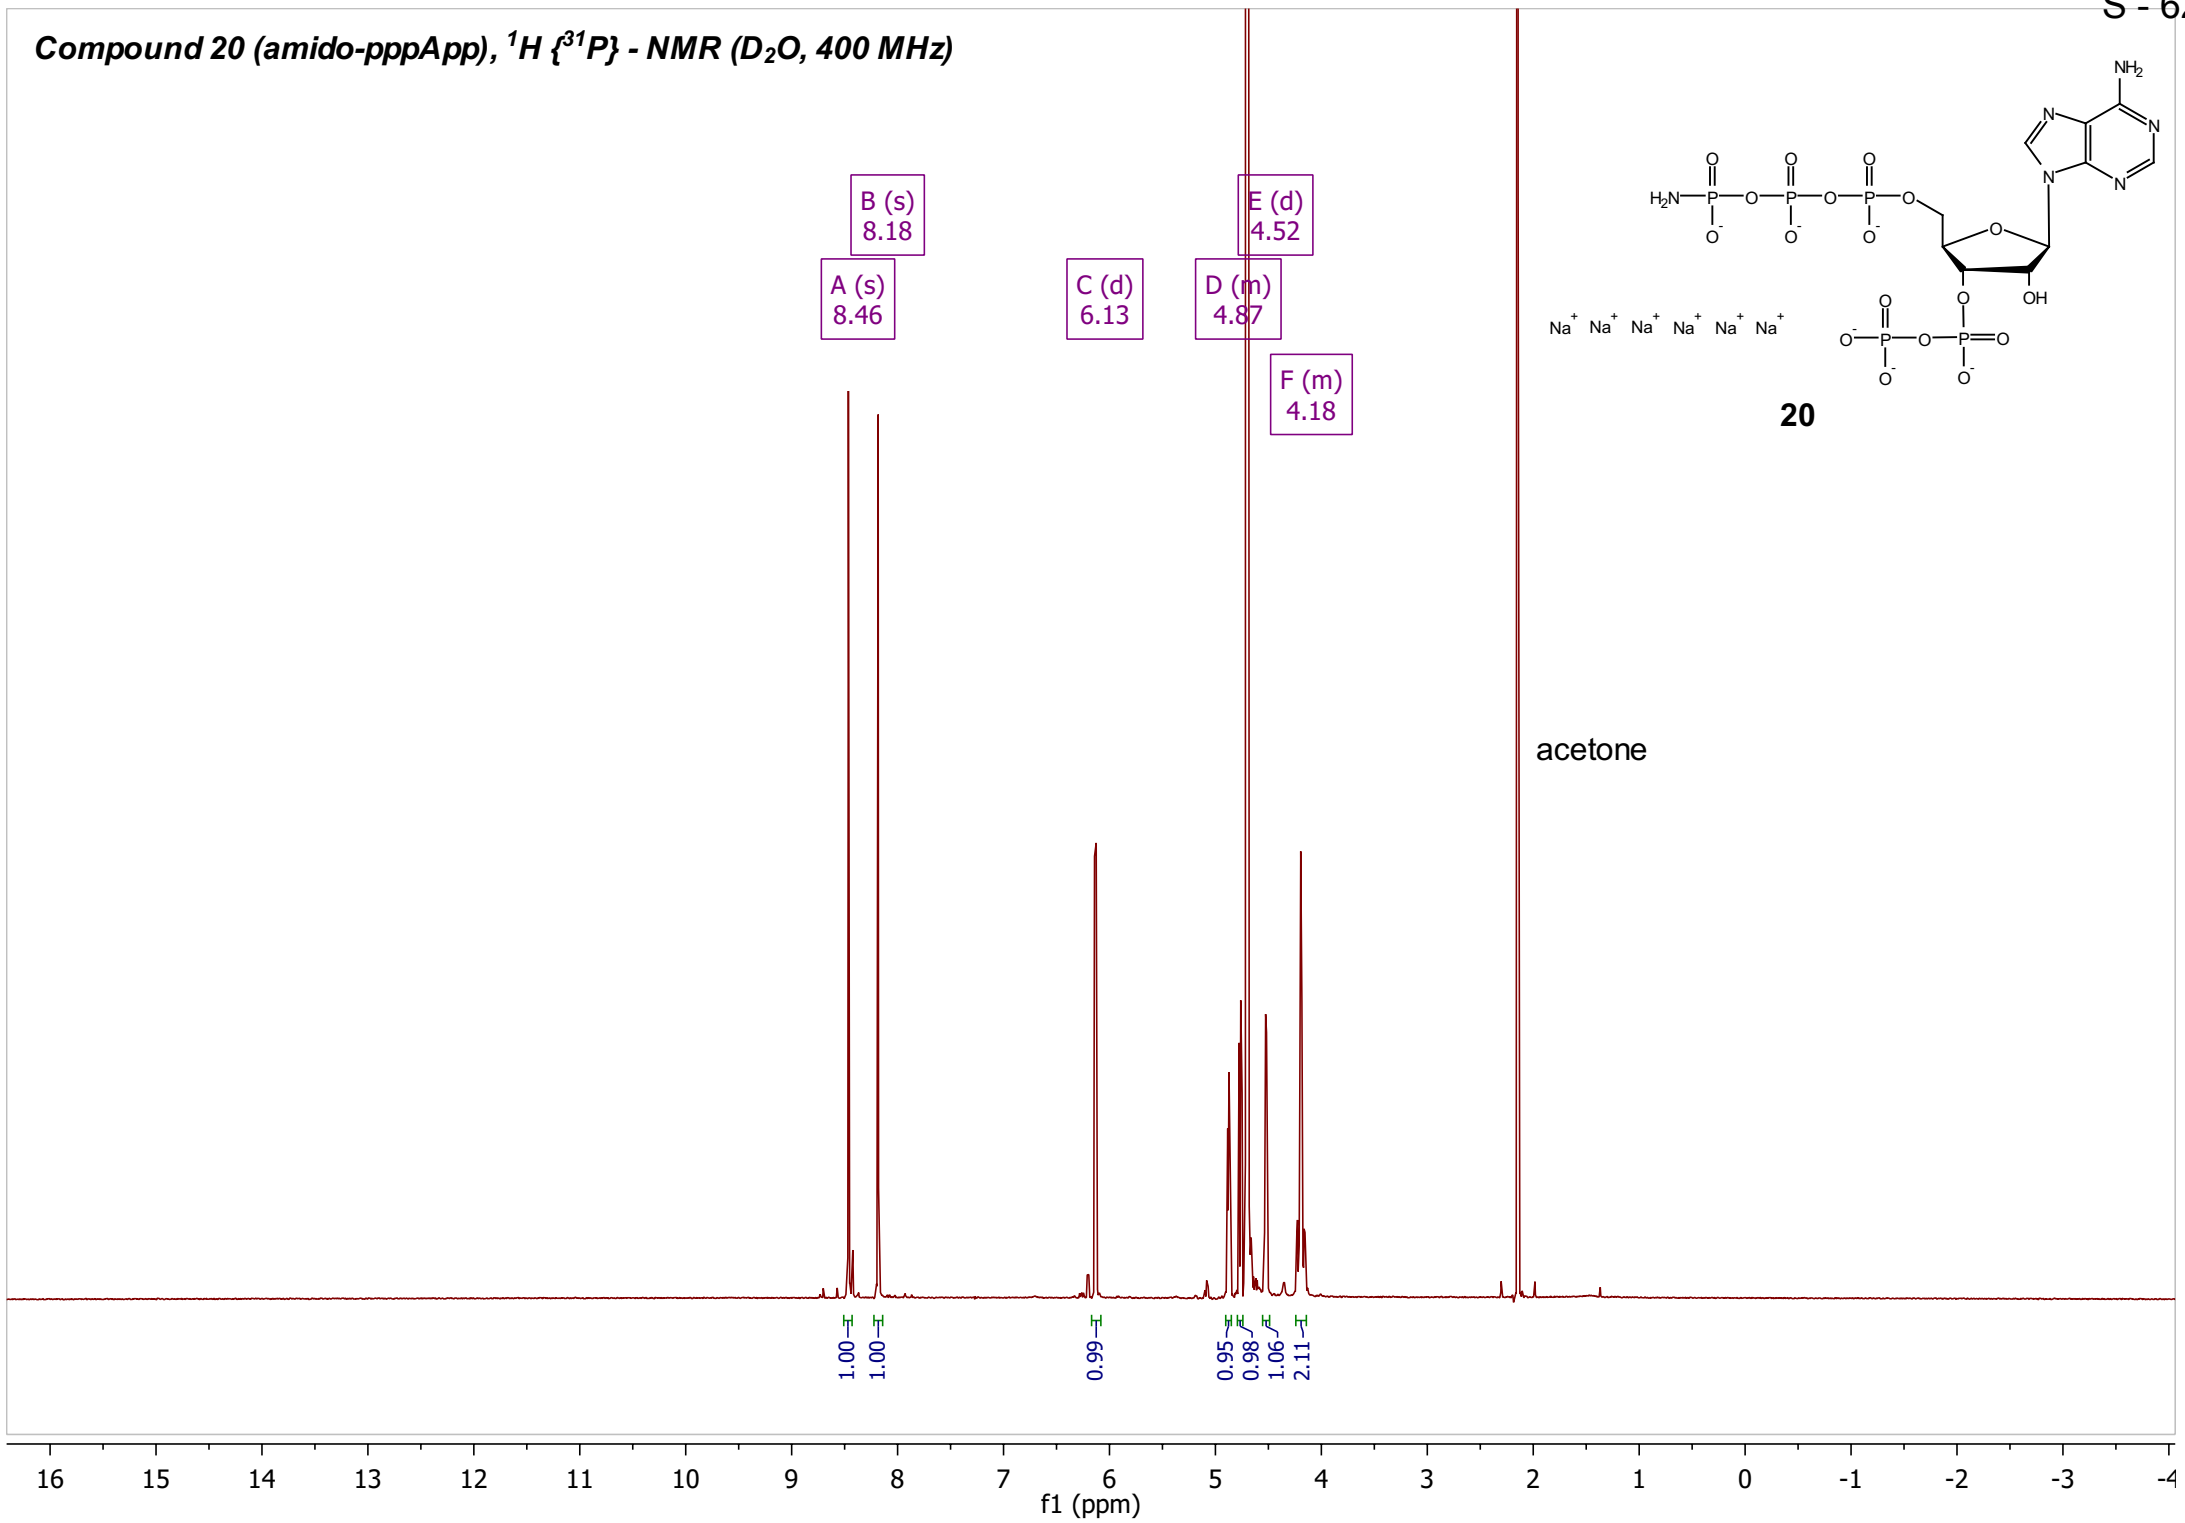

Compound 20 (amido-pppApp),  $^{31}\text{P}\{^1\text{H}\}$  - NMR ( $\text{D}_2\text{O}$ , 162 MHz)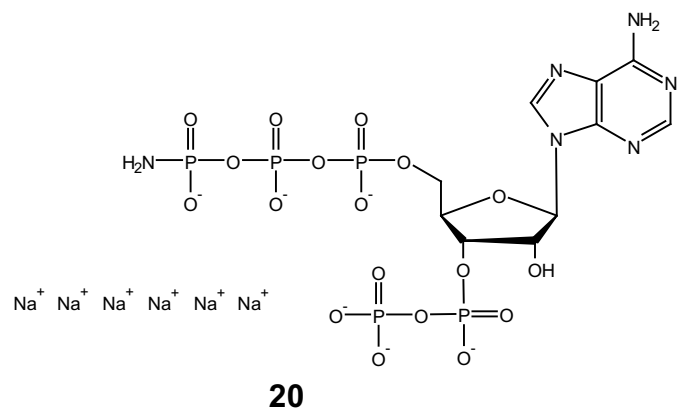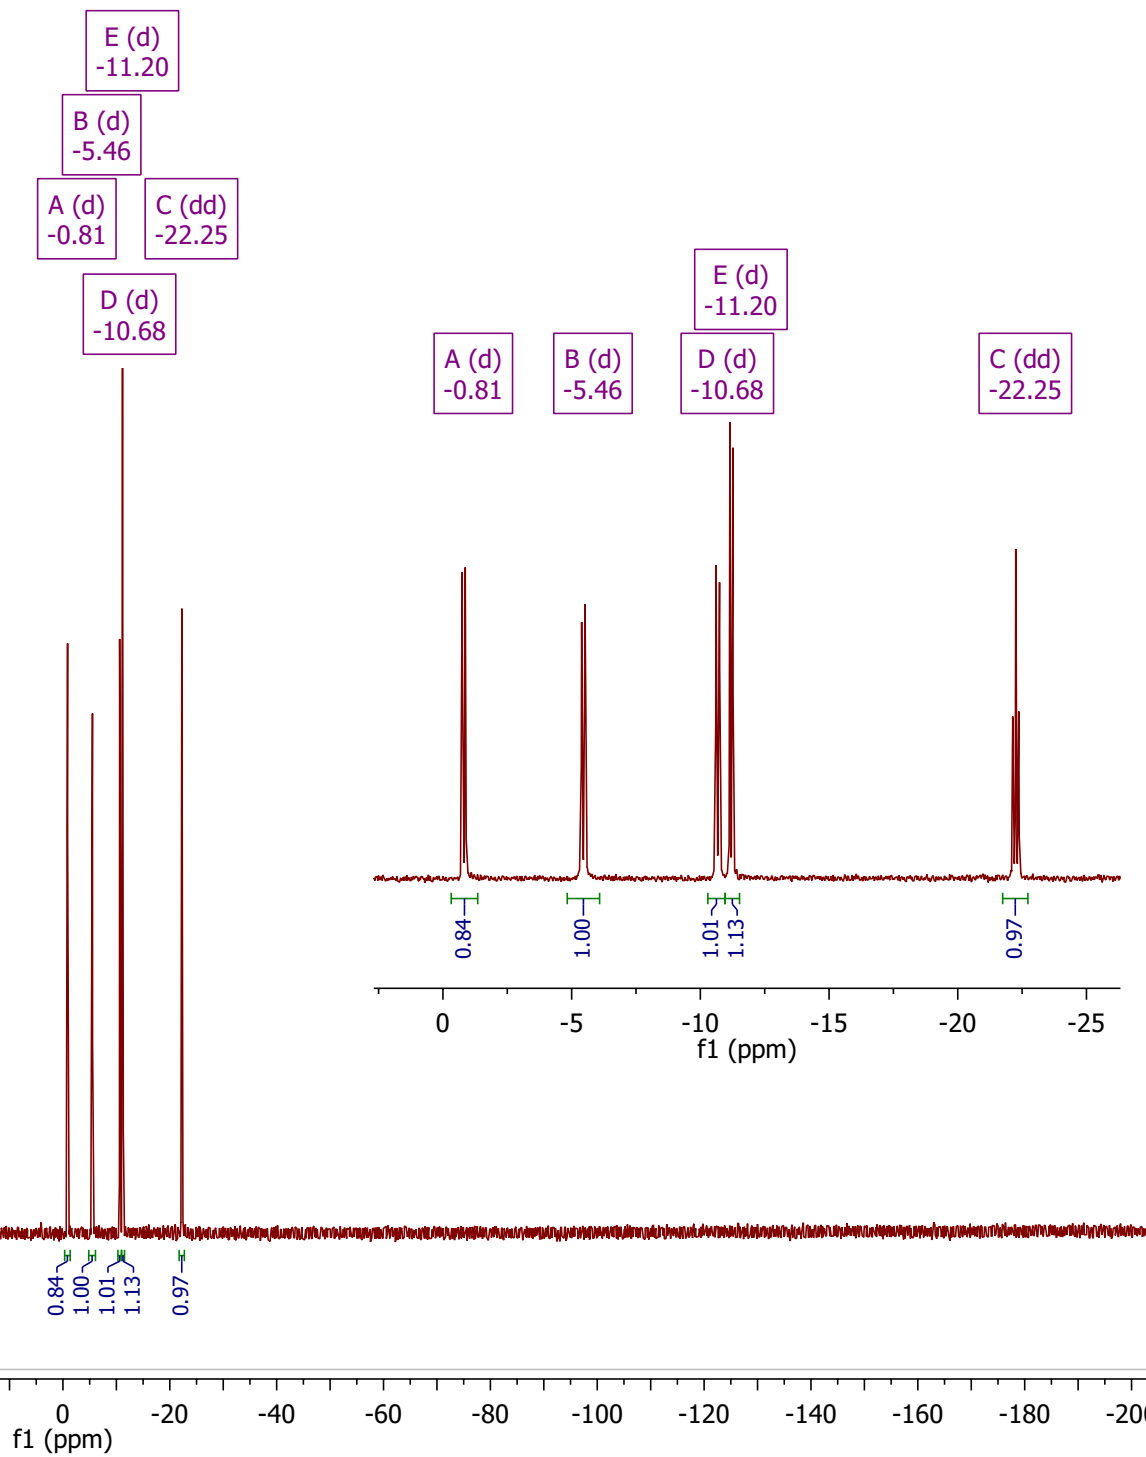



Compound 20 (amido-pppApp),  $^{31}\text{P}$  - NMR ( $\text{D}_2\text{O}$ , 162 MHz)

20

$\text{Na}^+ \text{Na}^+ \text{Na}^+ \text{Na}^+ \text{Na}^+ \text{Na}^+$

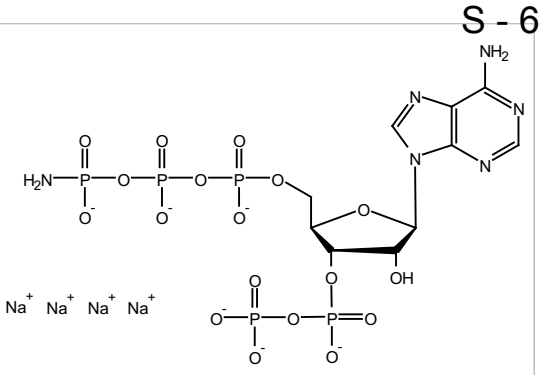

A (d)  
-0.81

B (d)  
-5.46

C (dd)  
-10.67

D (d)  
-11.20

E (dd)  
-22.26

5'-P(c)

3'-P(b)

3'-P(a)

5'-P(a)

5'-P(b)

0.84

1.00

0.99

1.04

0.95

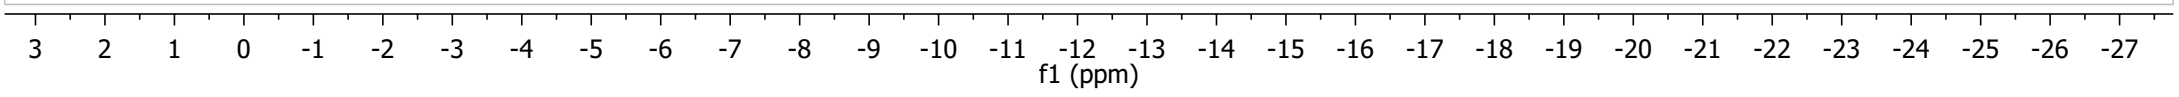

Compound 20 (amido-pppApp), DQF - COSY (D<sub>2</sub>O, 400 MHz)

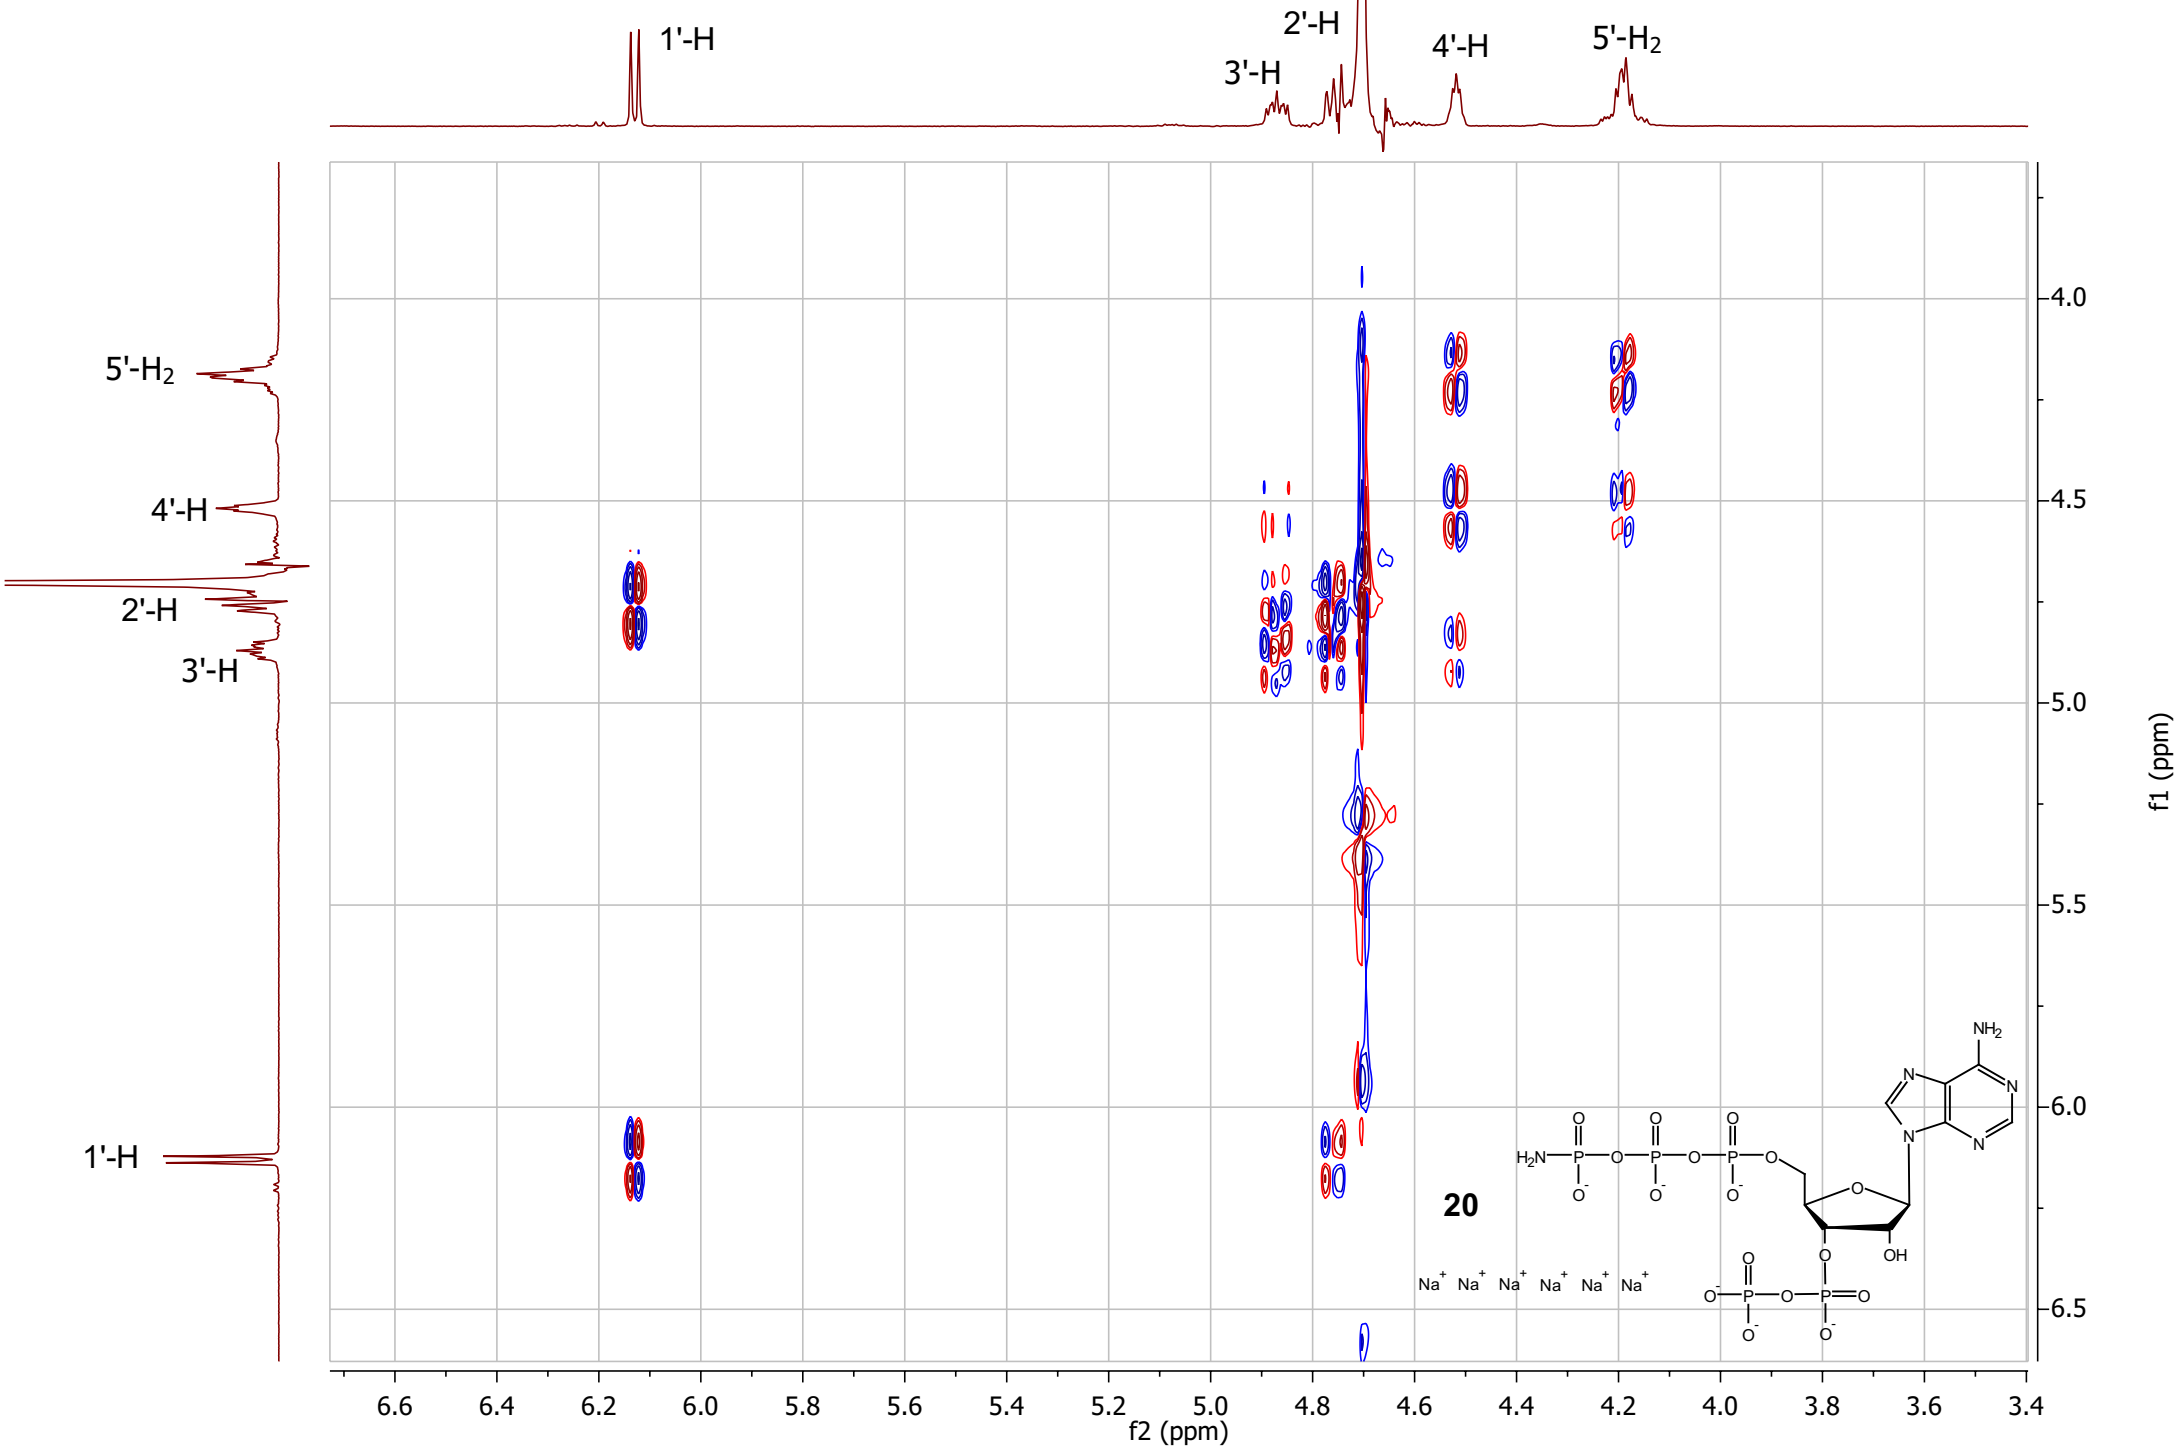

Compound 20 (amido-pppApp), HSQC (D<sub>2</sub>O, 400 MHz)

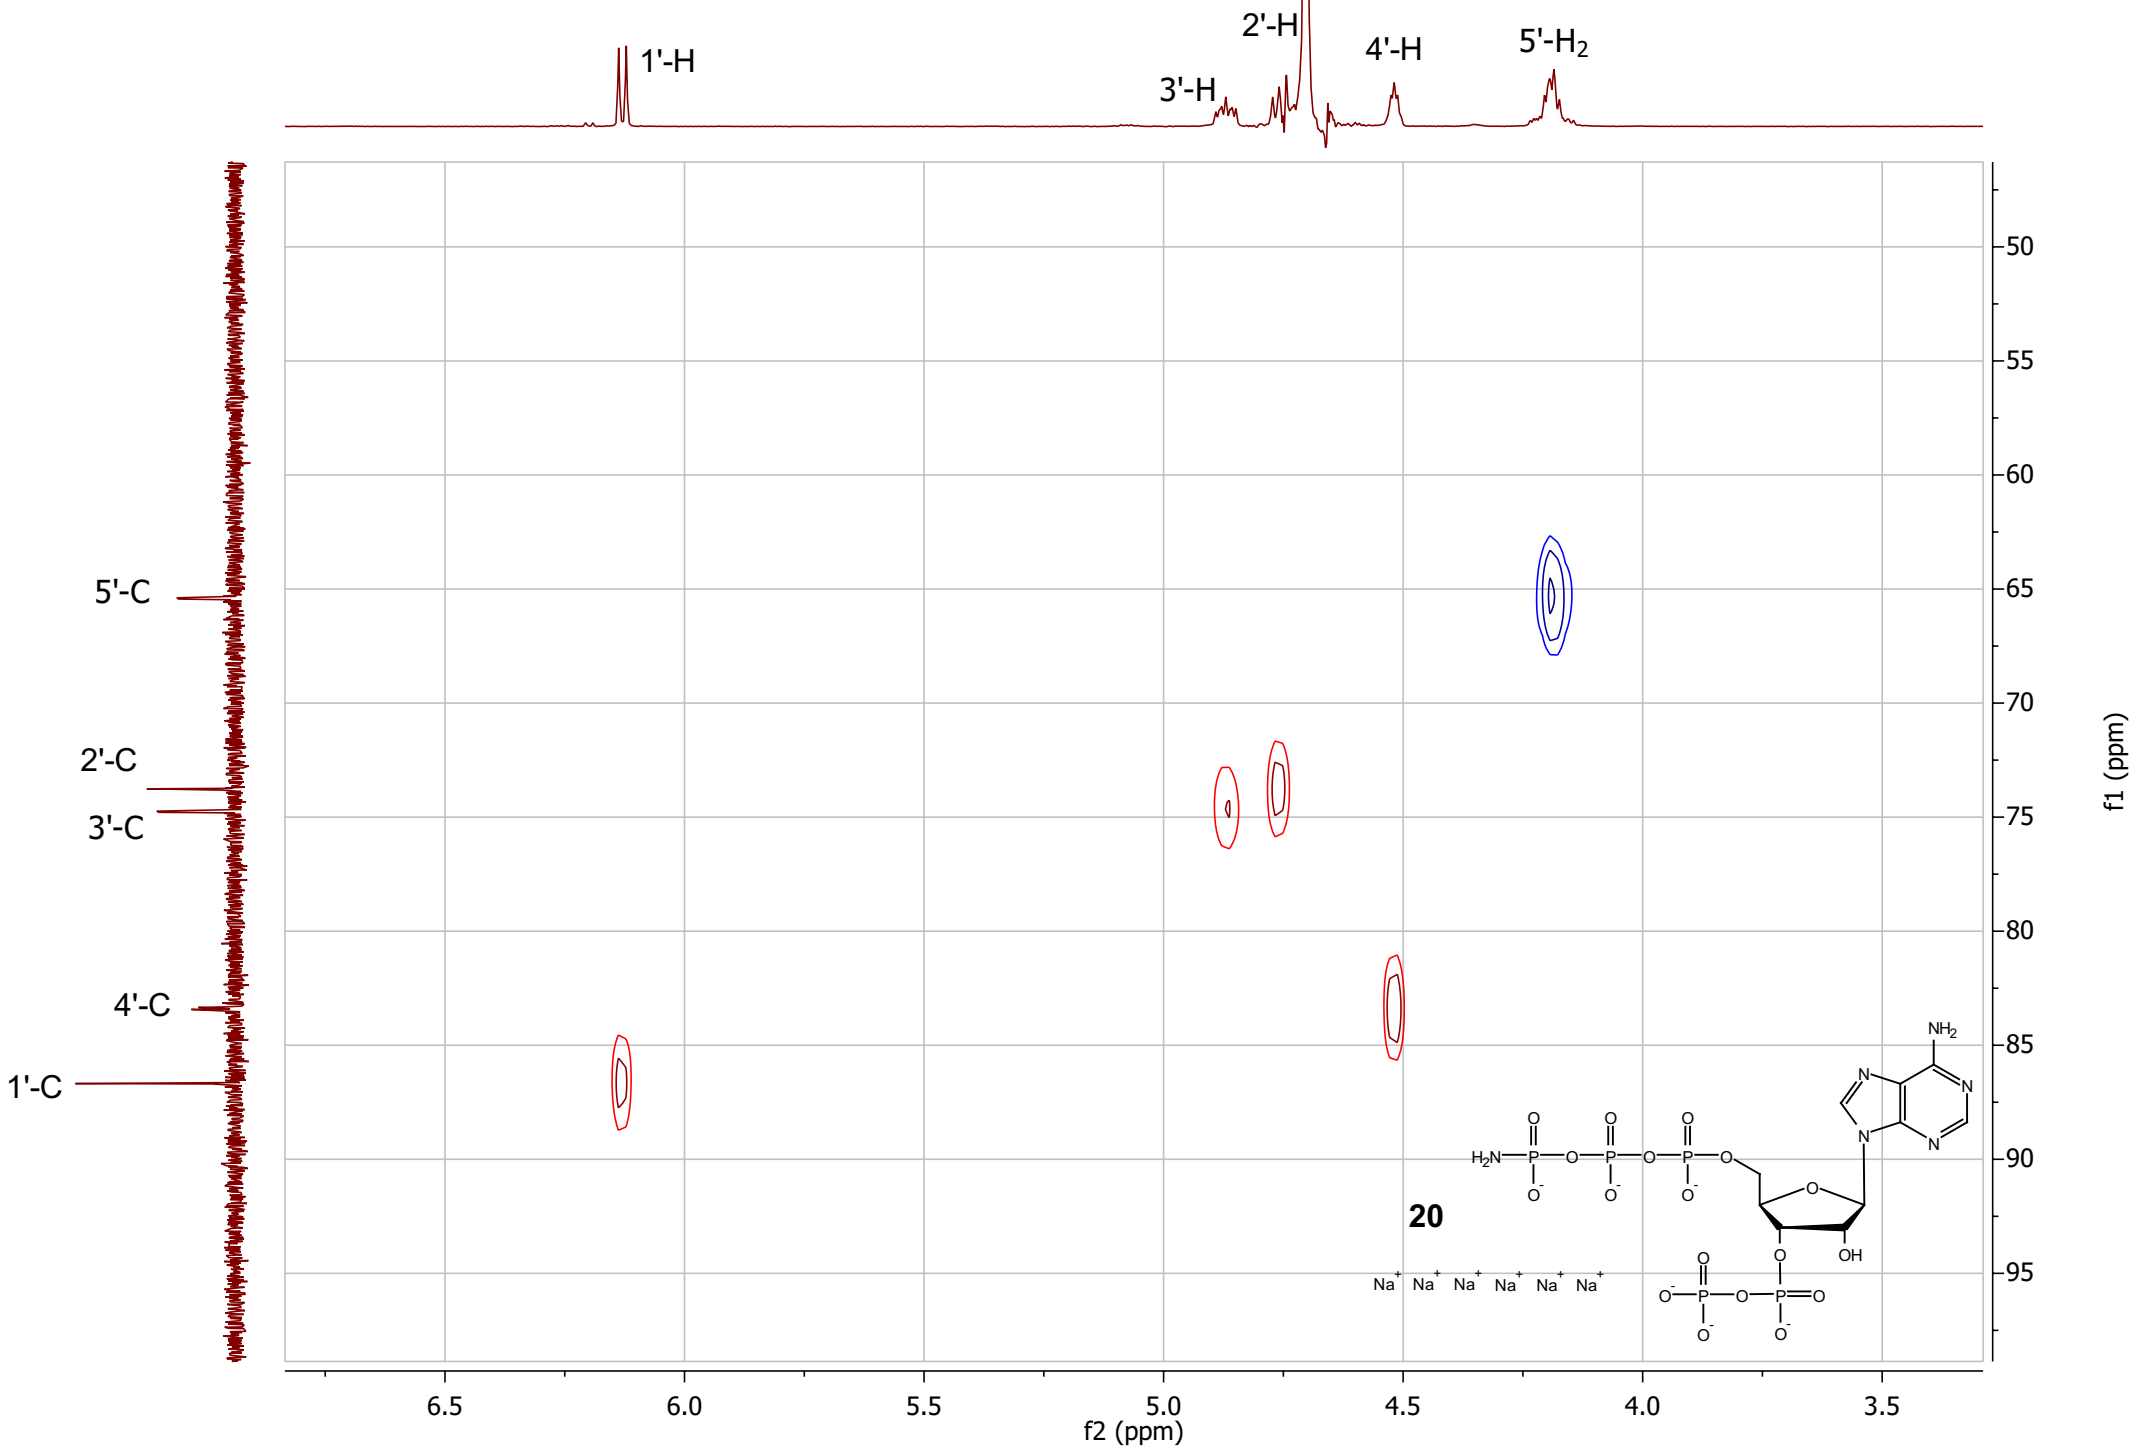



Compound 20 (amido-pppApp), PP - COSY (D<sub>2</sub>O, 400 MHz)

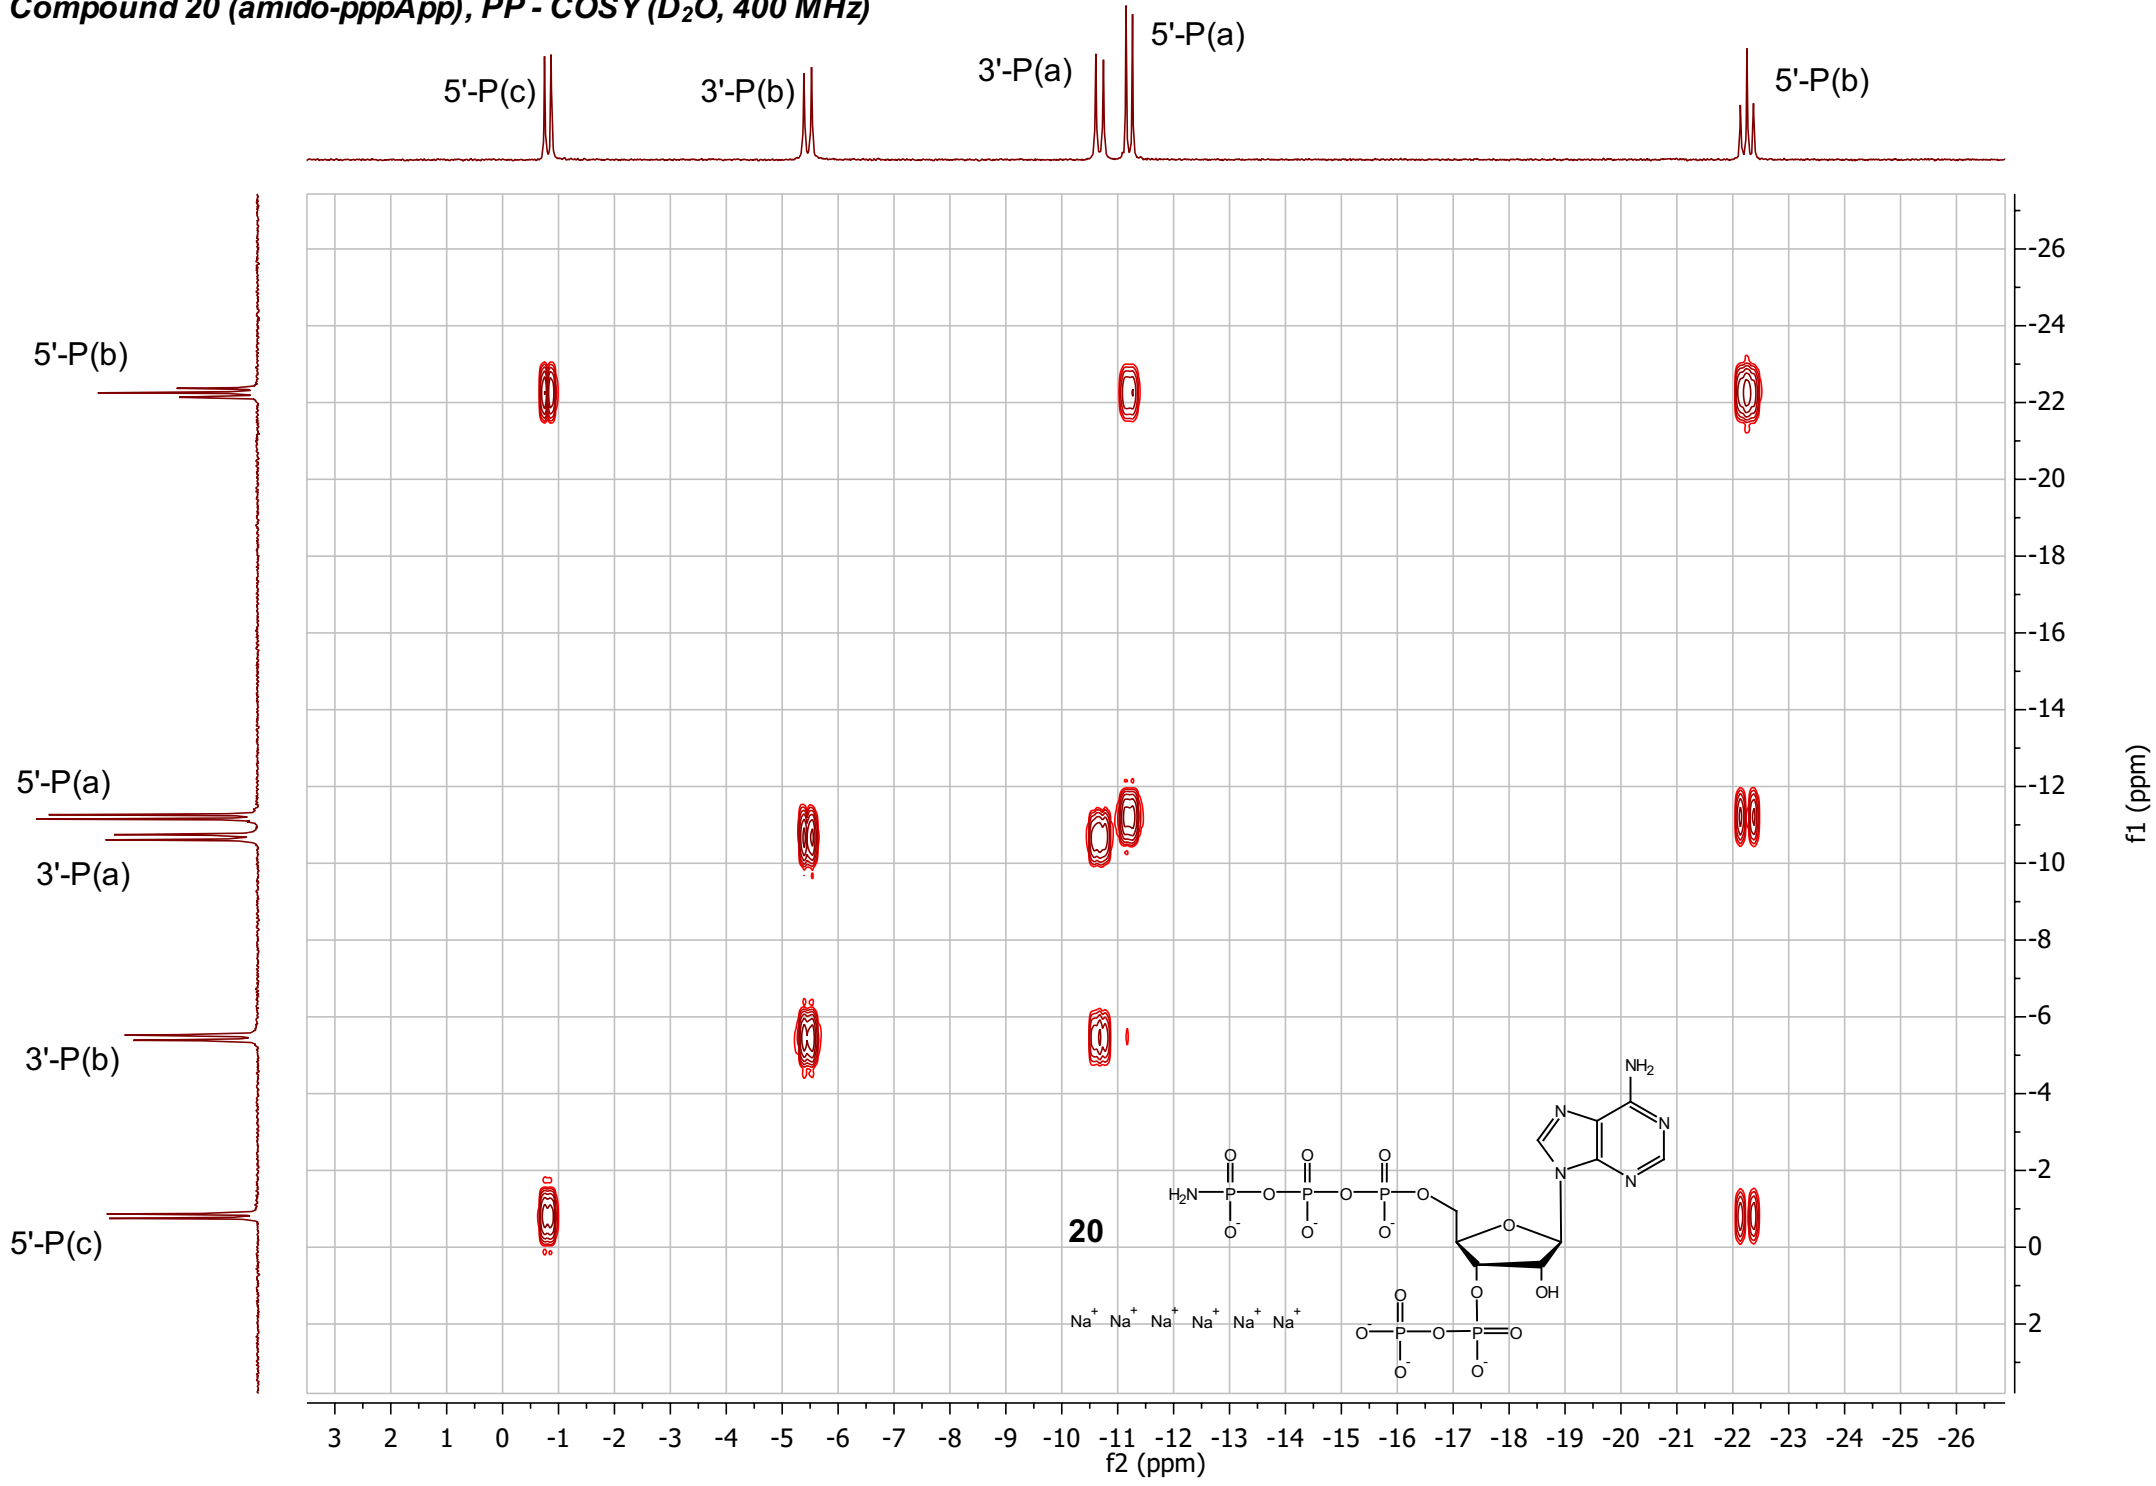

Compound 19 (amido-pppApp),  $^{13}\text{C}$   $\{^1\text{H}\}$  - NMR ( $\text{D}_2\text{O}$ , 101 MHz)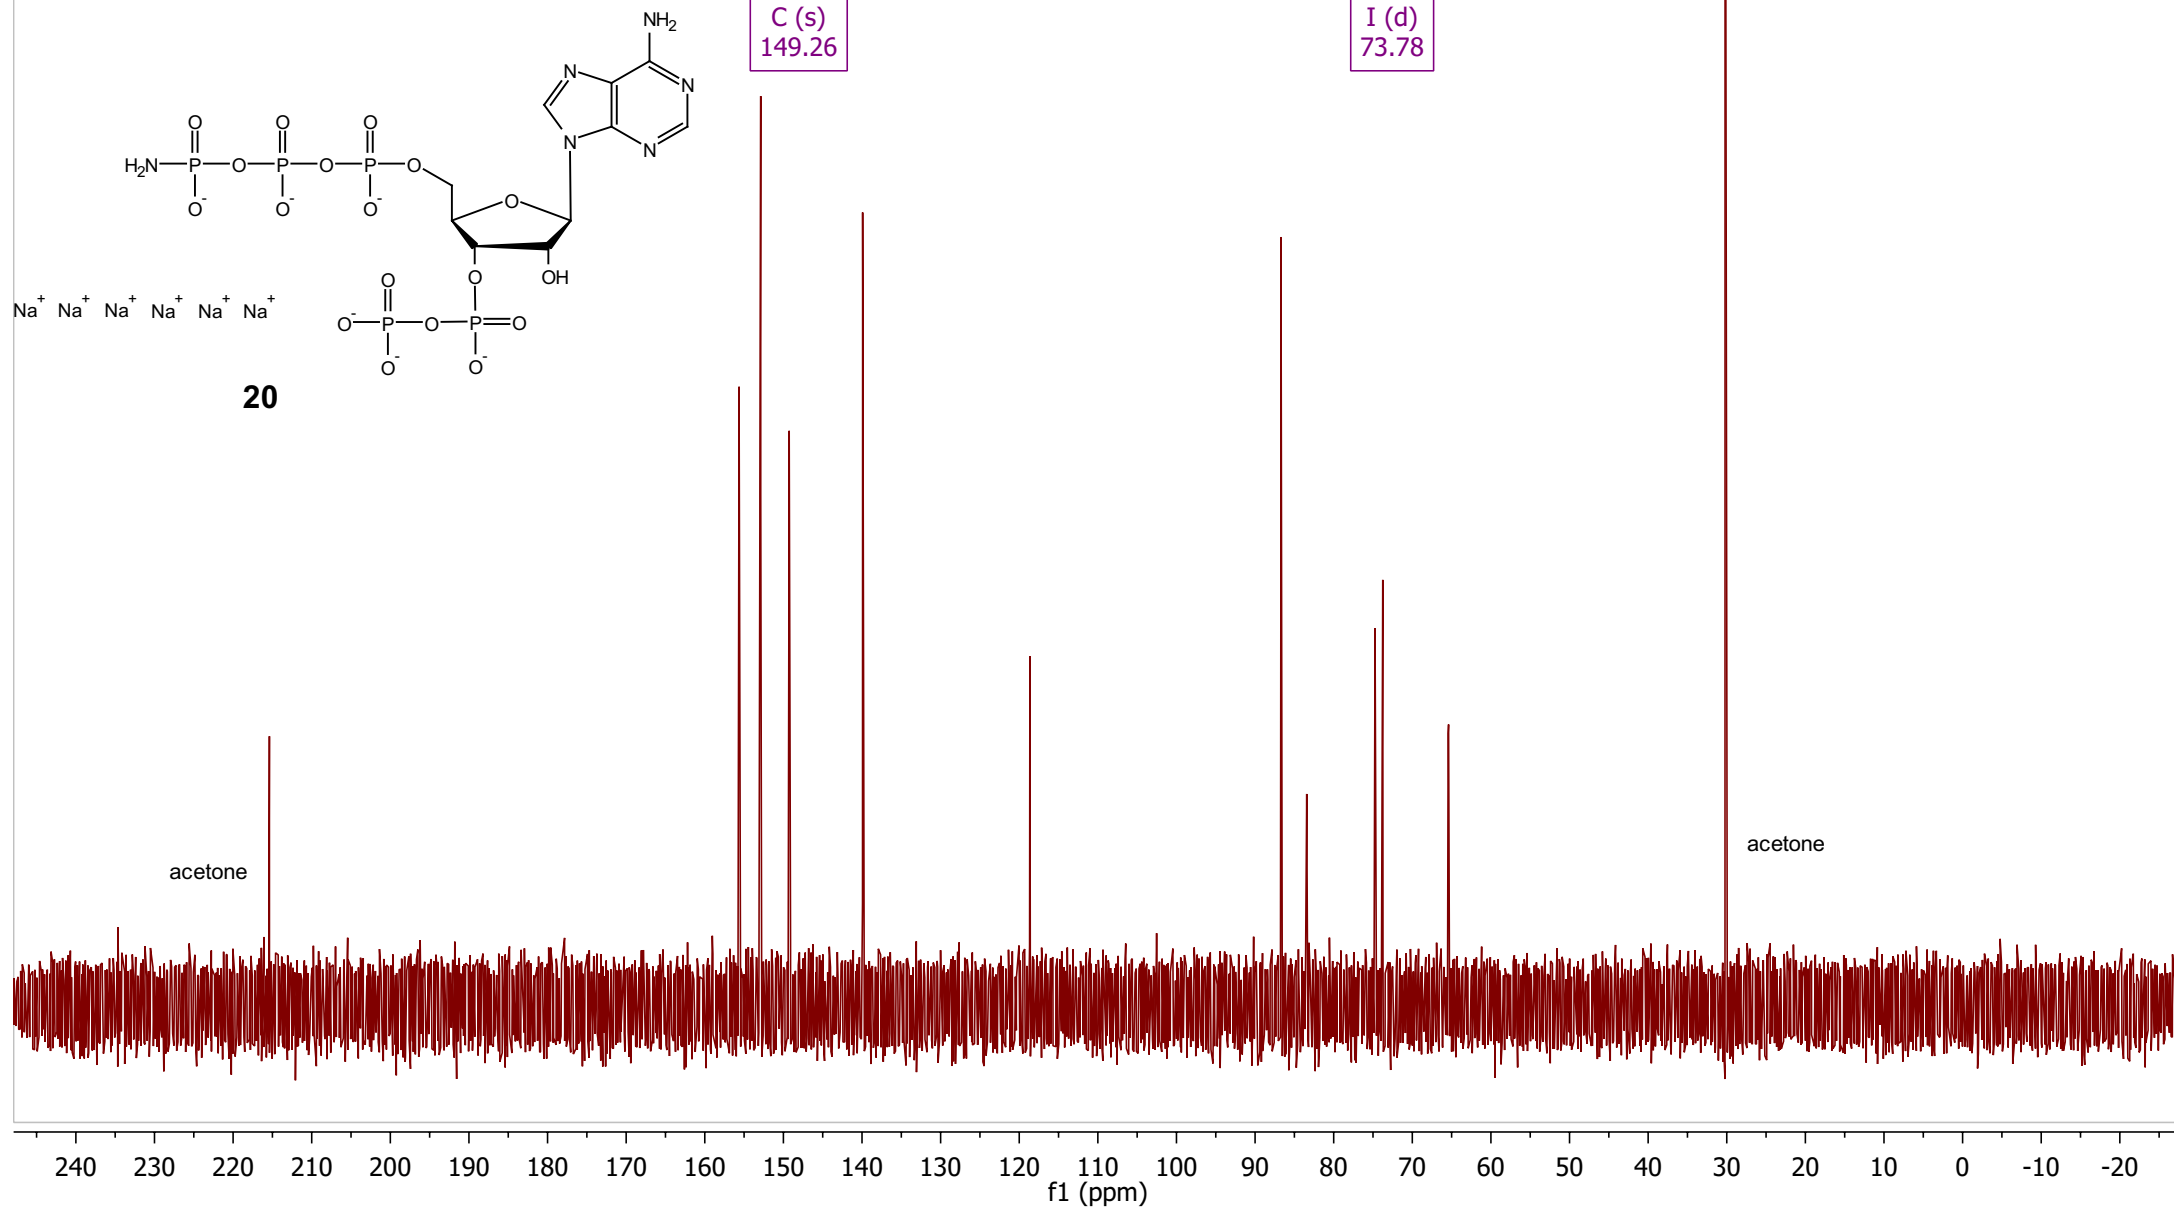

**Compound 21 (amino-pppGpp),  $^1\text{H}$  - NMR ( $\text{D}_2\text{O}$ , 400 MHz)**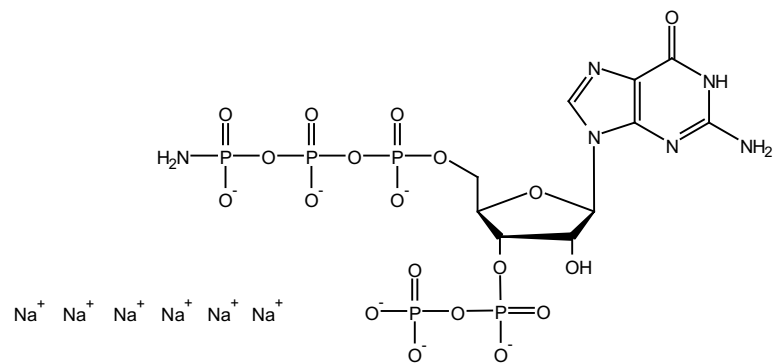**21**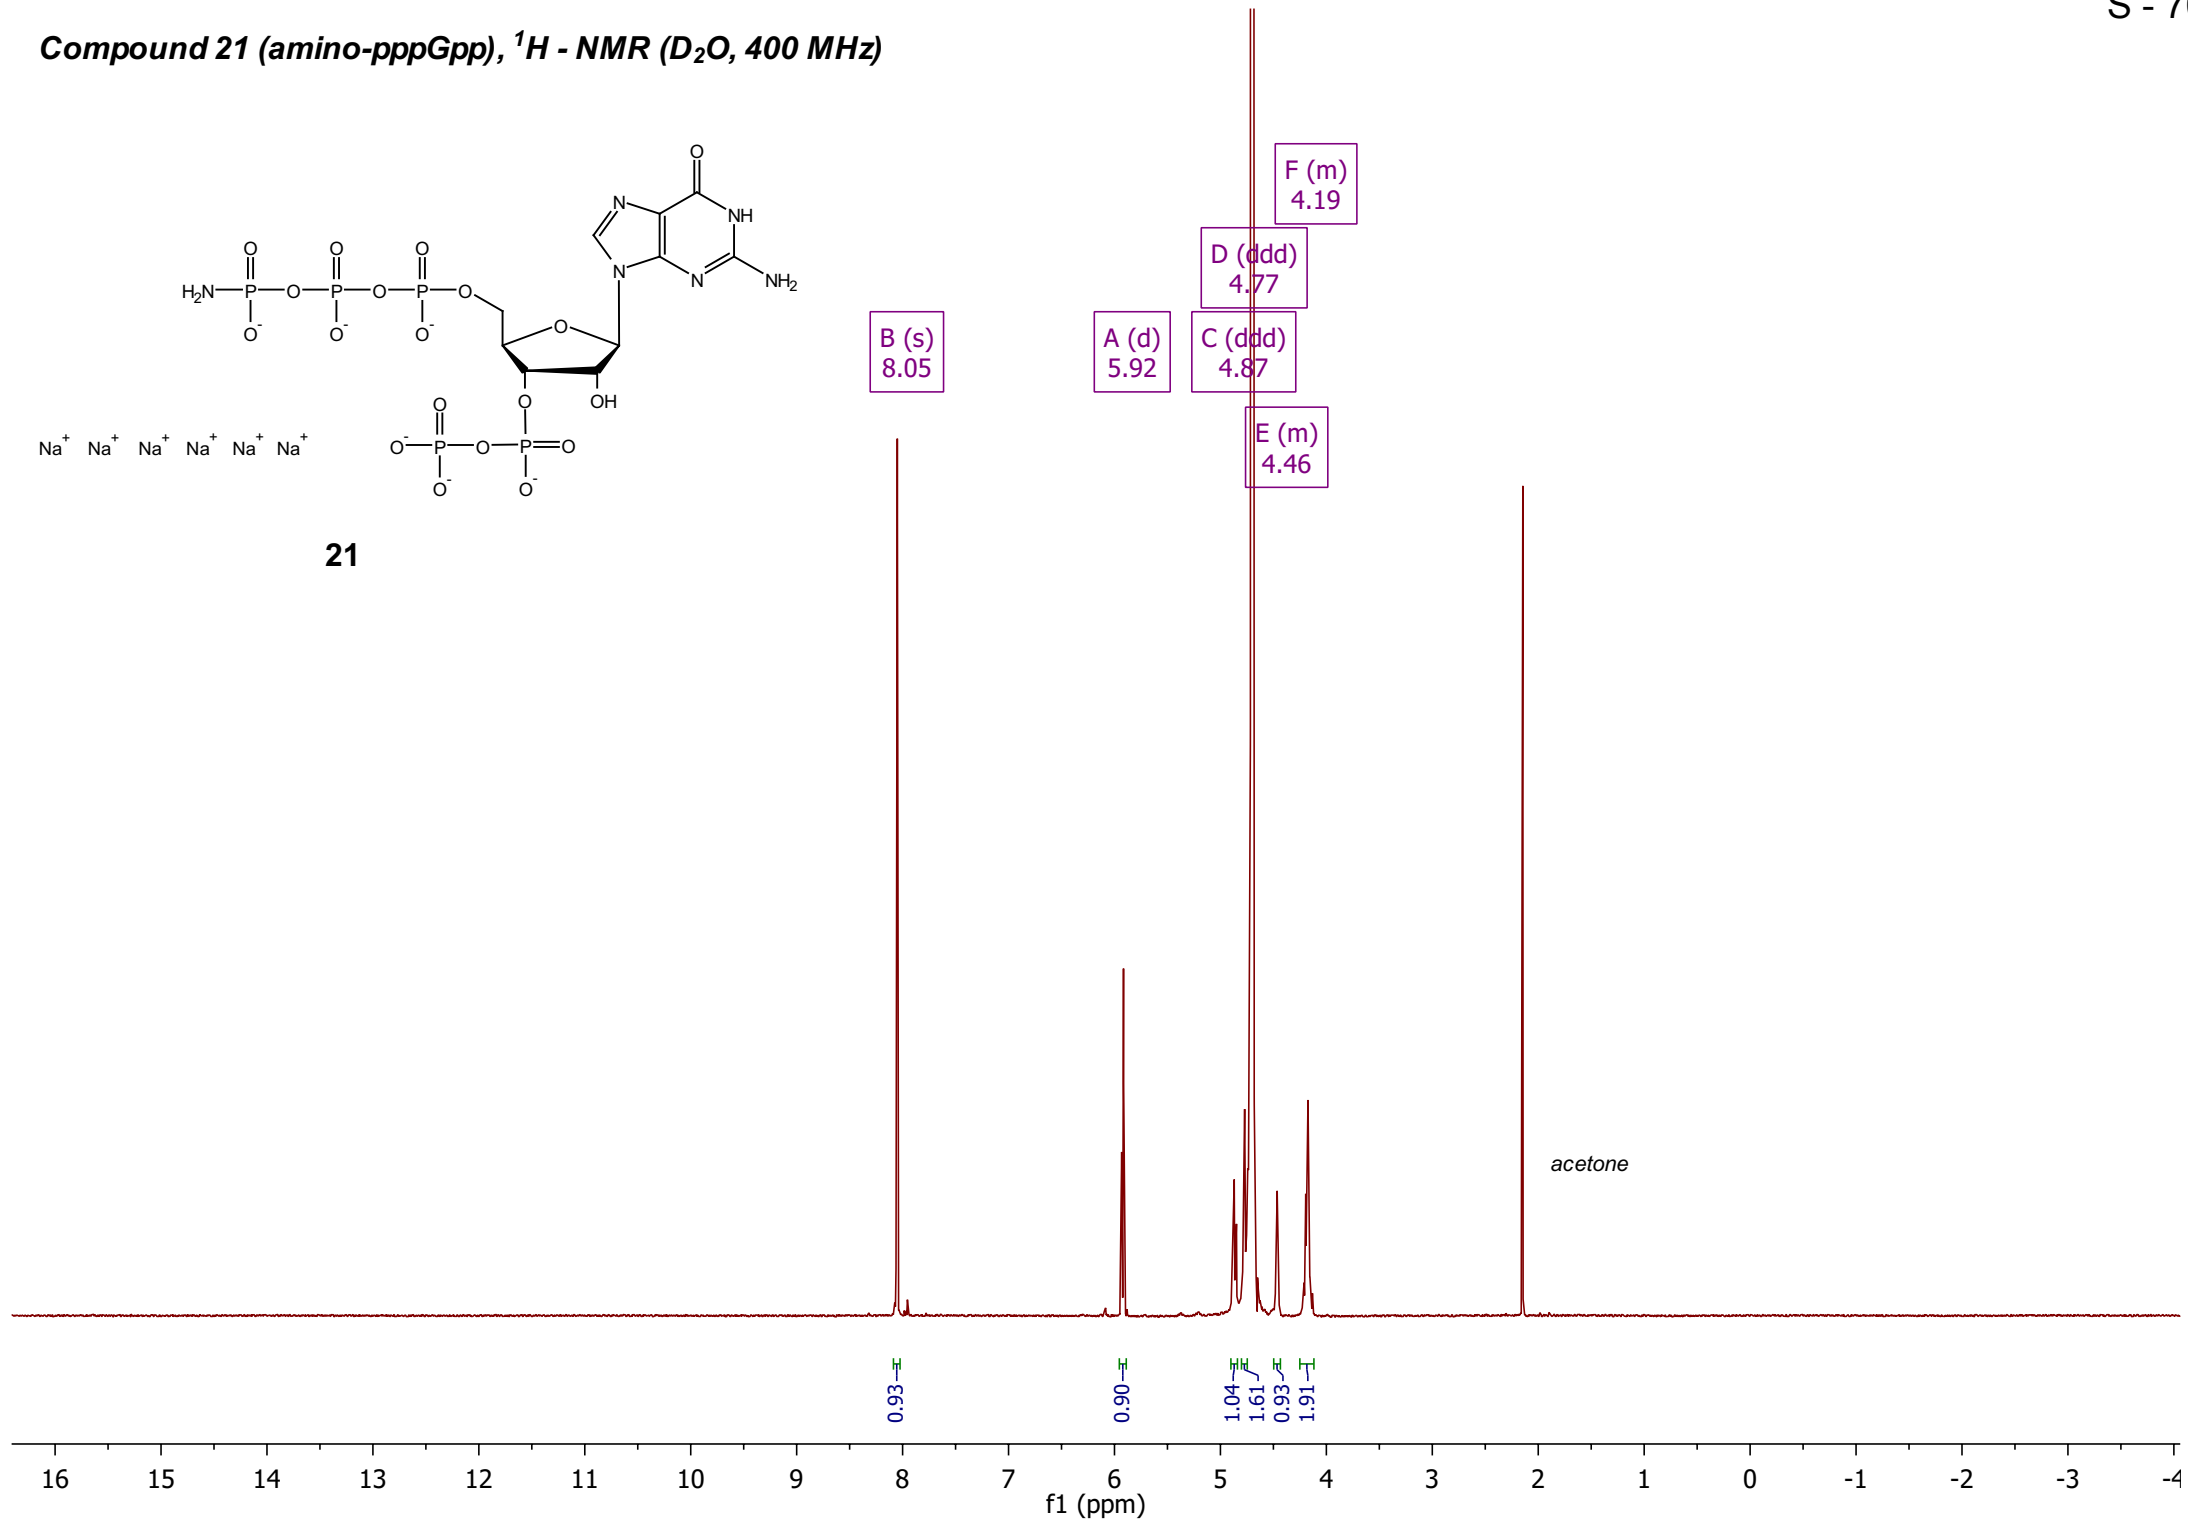

Compound 21 (amino-pppGpp),  $^1\text{H}$   $\{^{31}\text{P}\}$  - NMR ( $\text{D}_2\text{O}$ , 400 MHz)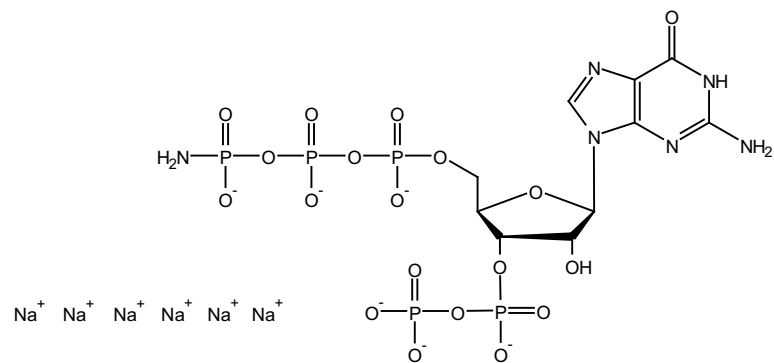**21**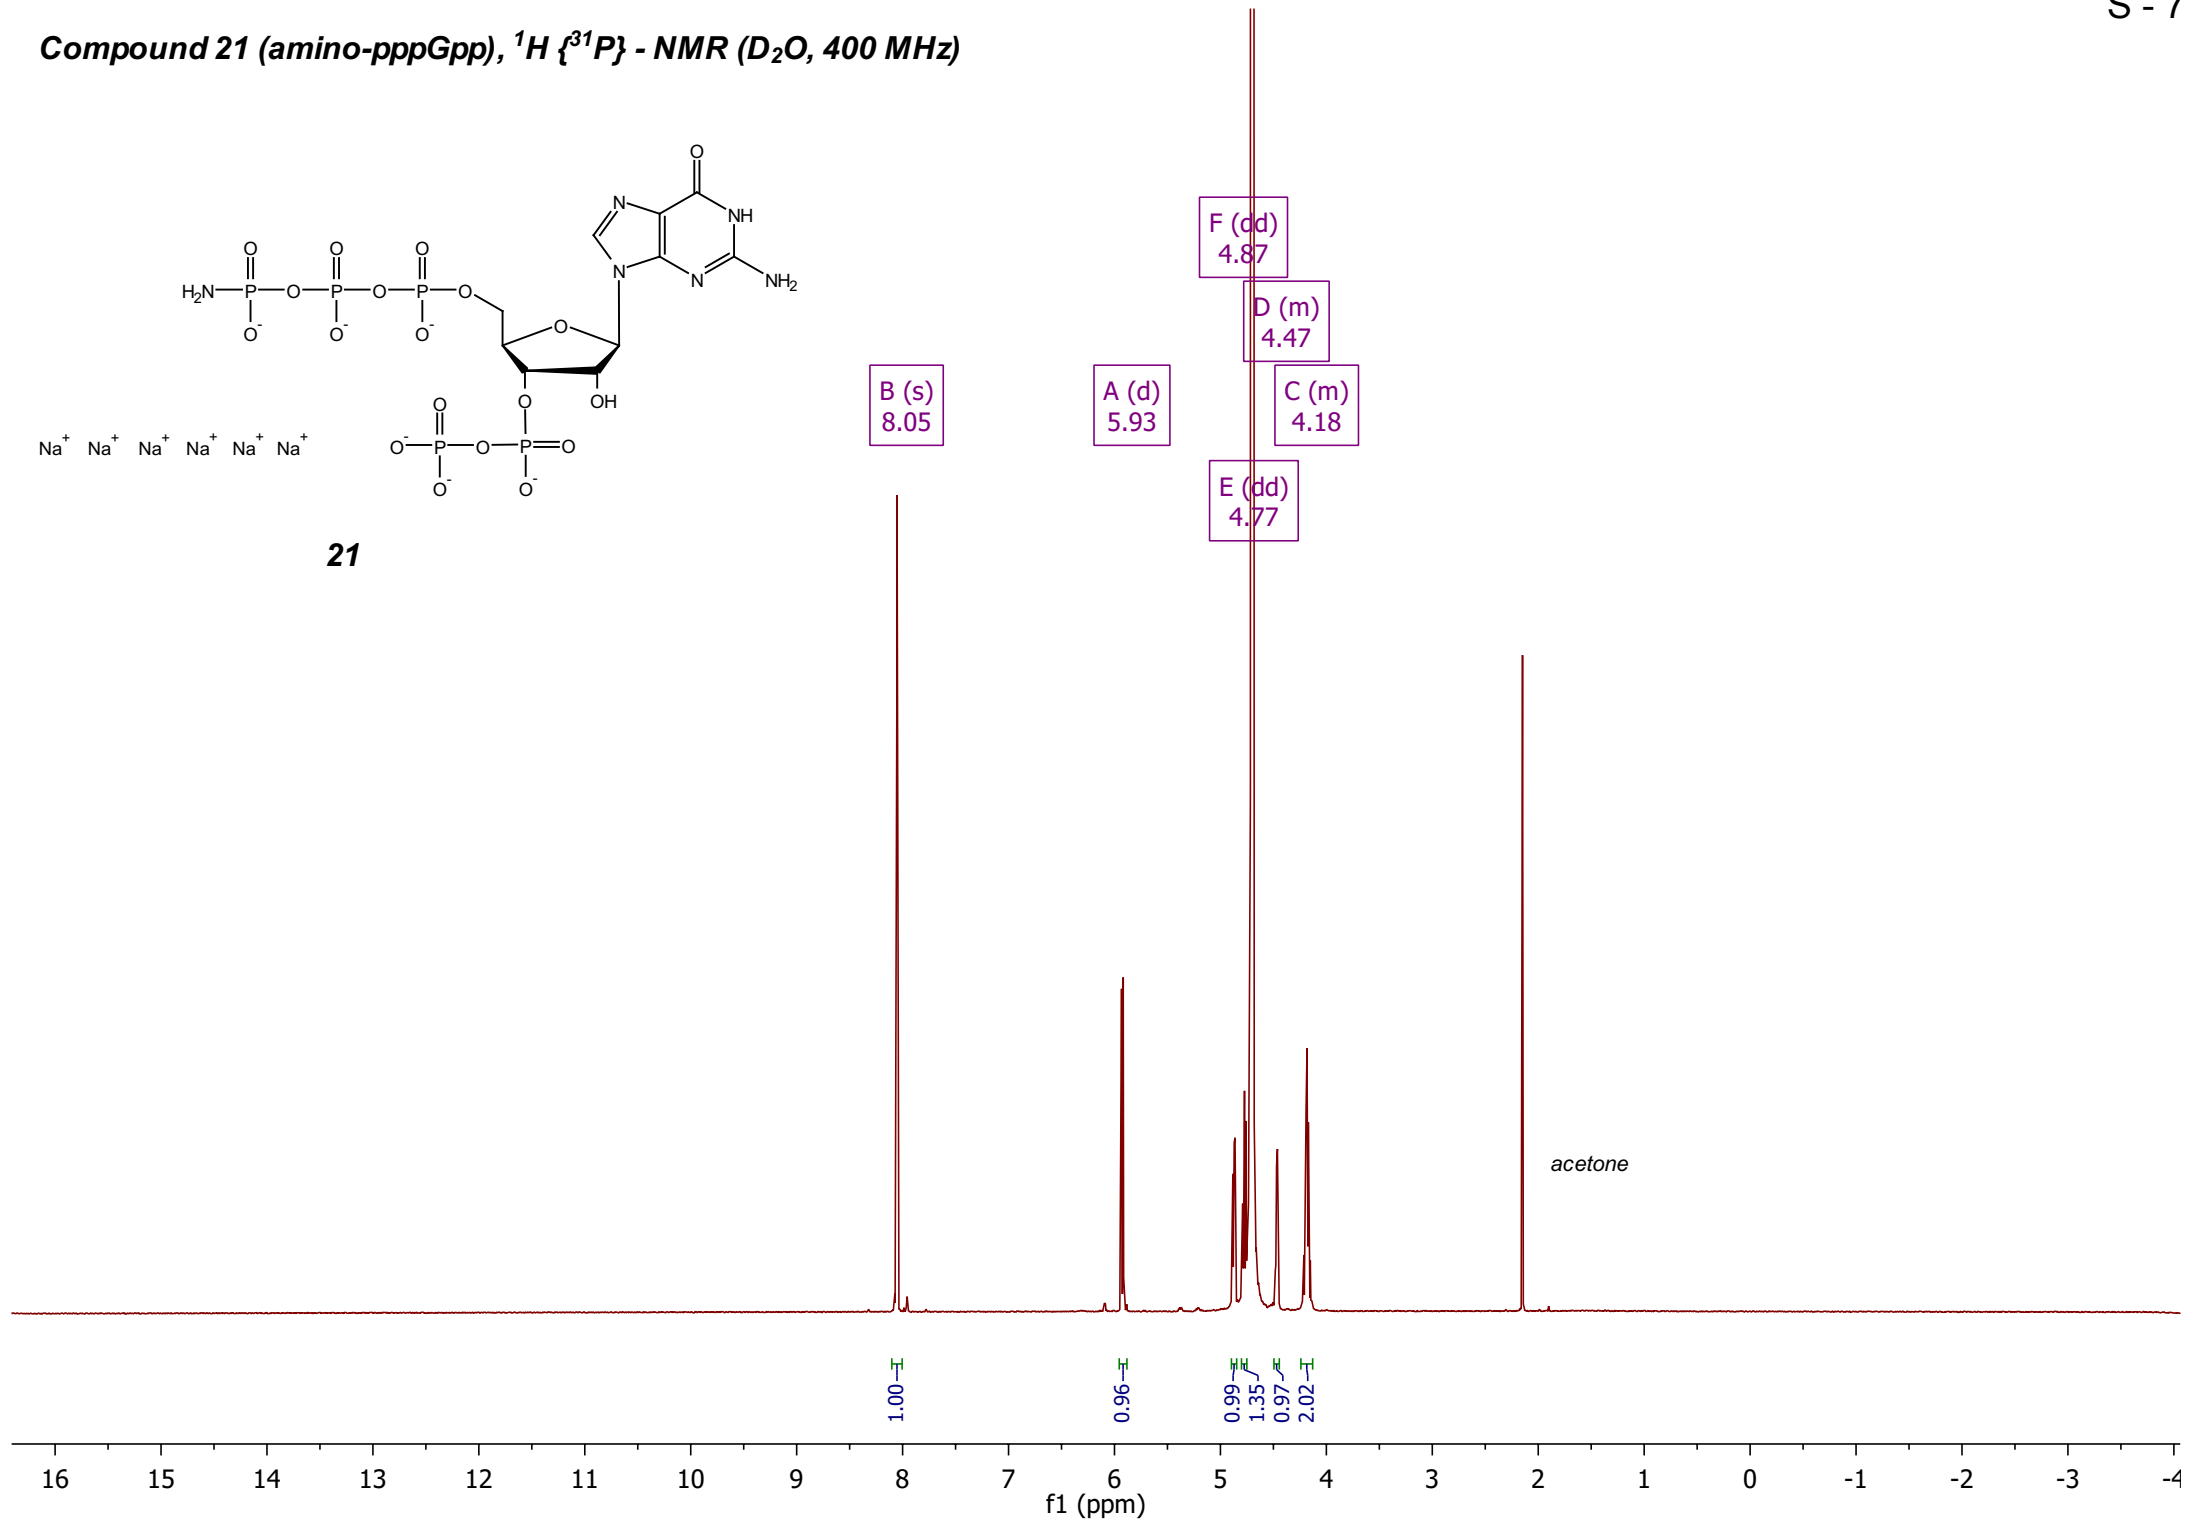



Compound 21 (amino-pppGpp),  $^{31}\text{P}$   $\{^1\text{H}\}$  - NMR ( $\text{D}_2\text{O}$ , 162 MHz)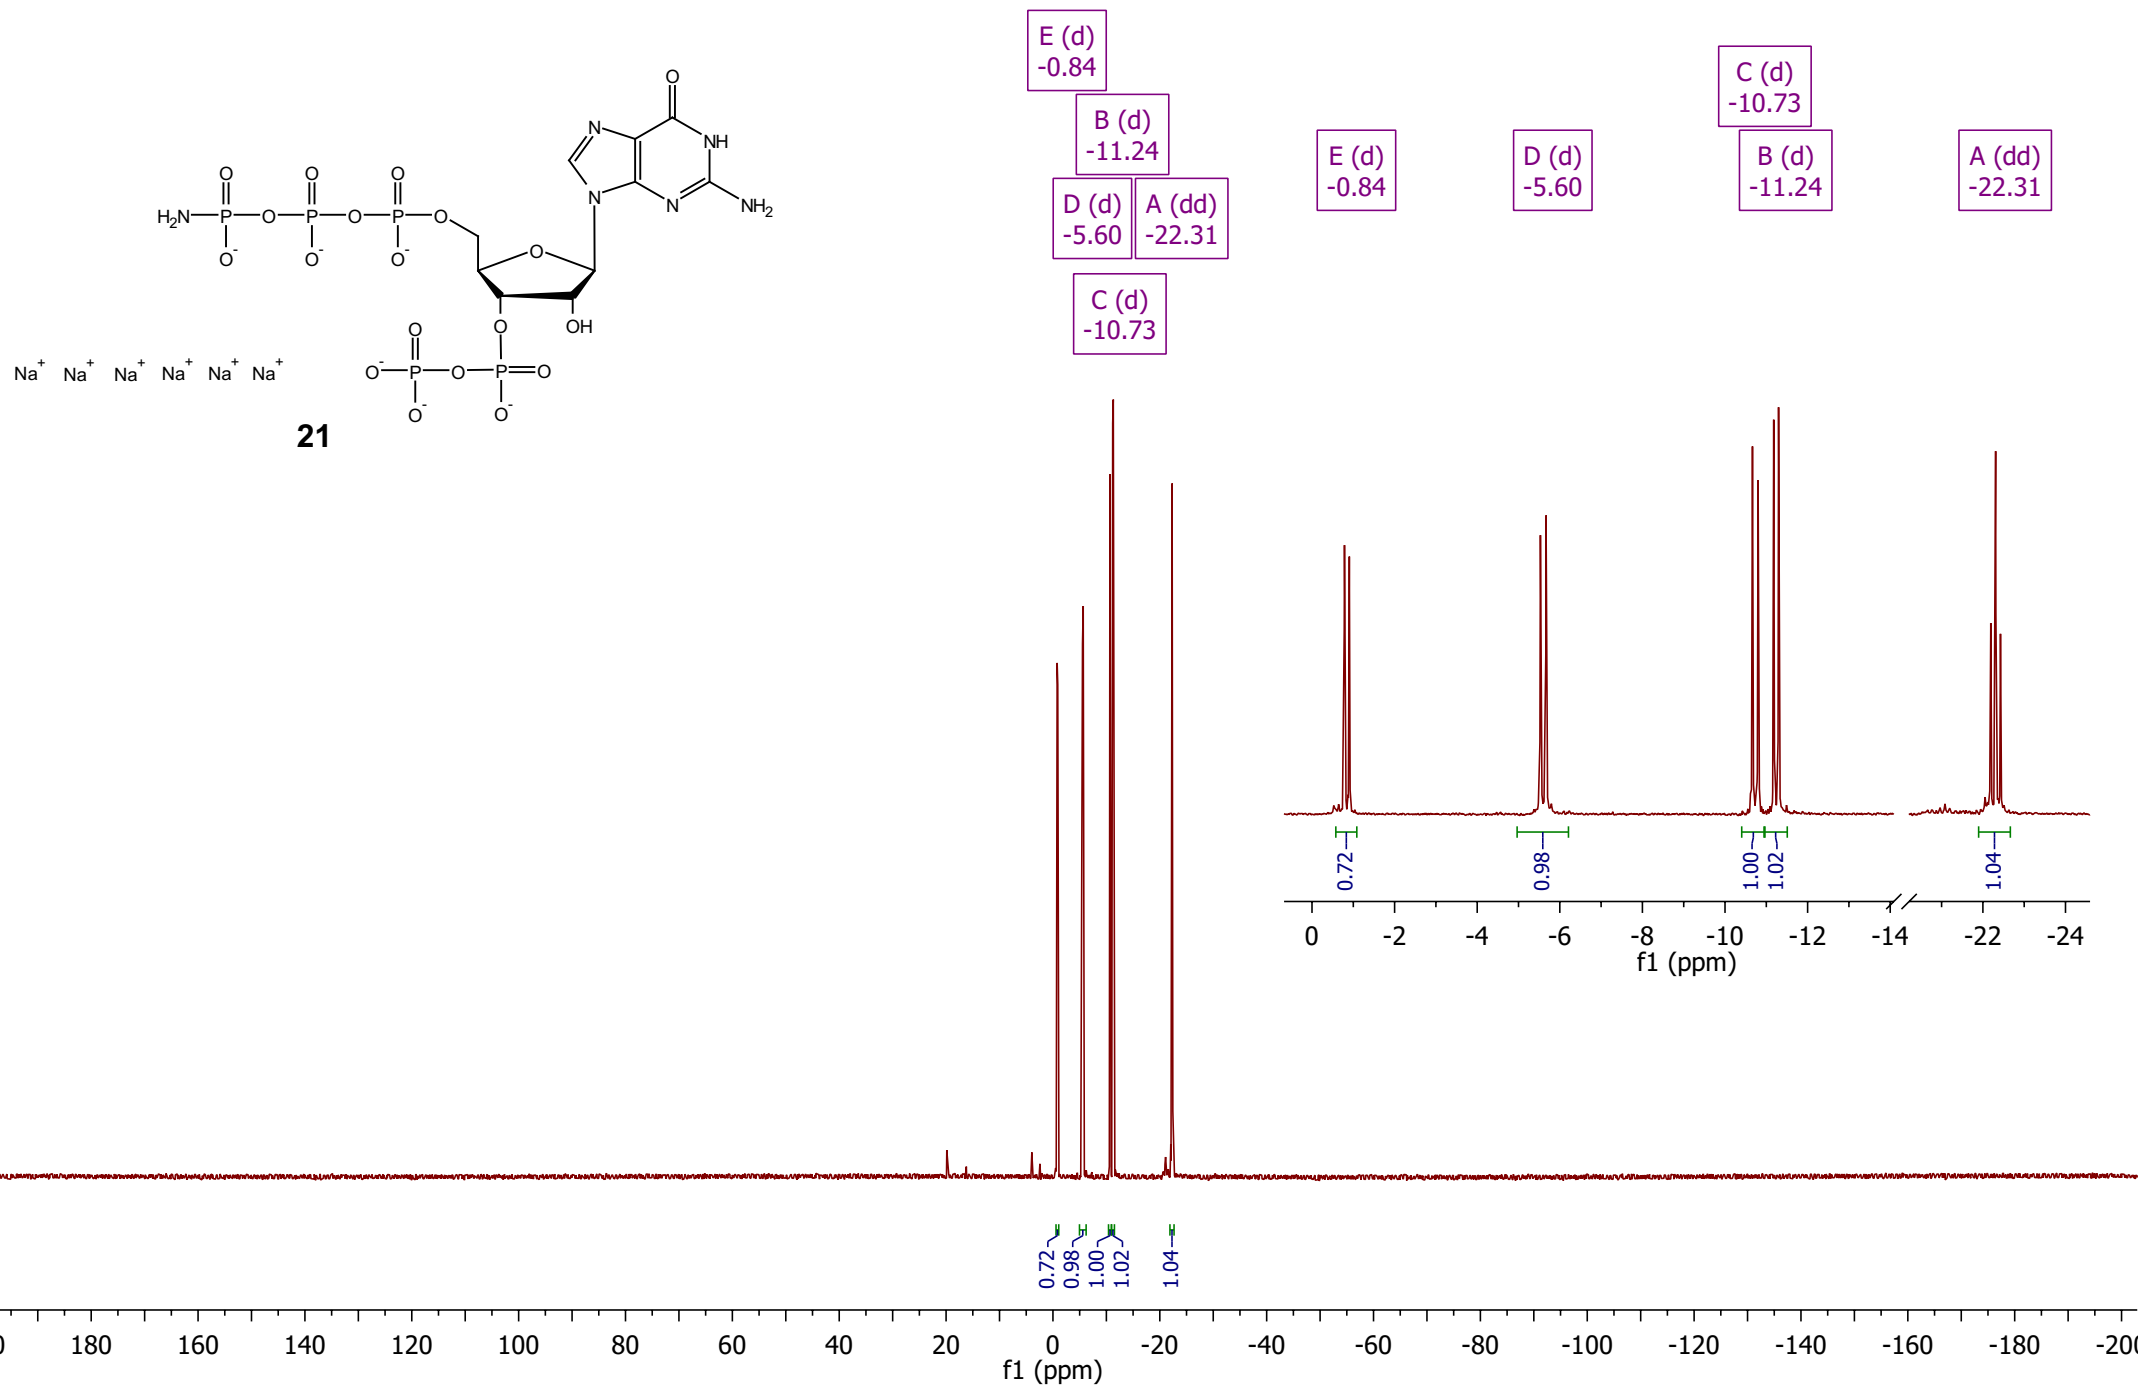

Compound 21 (amino-pppGpp),  $^{31}\text{P}$  - NMR ( $\text{D}_2\text{O}$ , 162 MHz)

S - 73

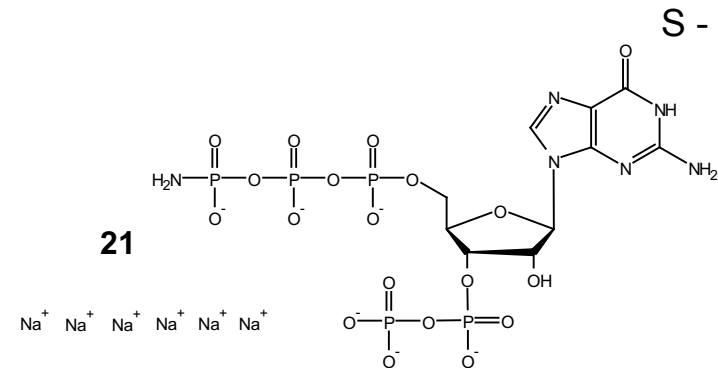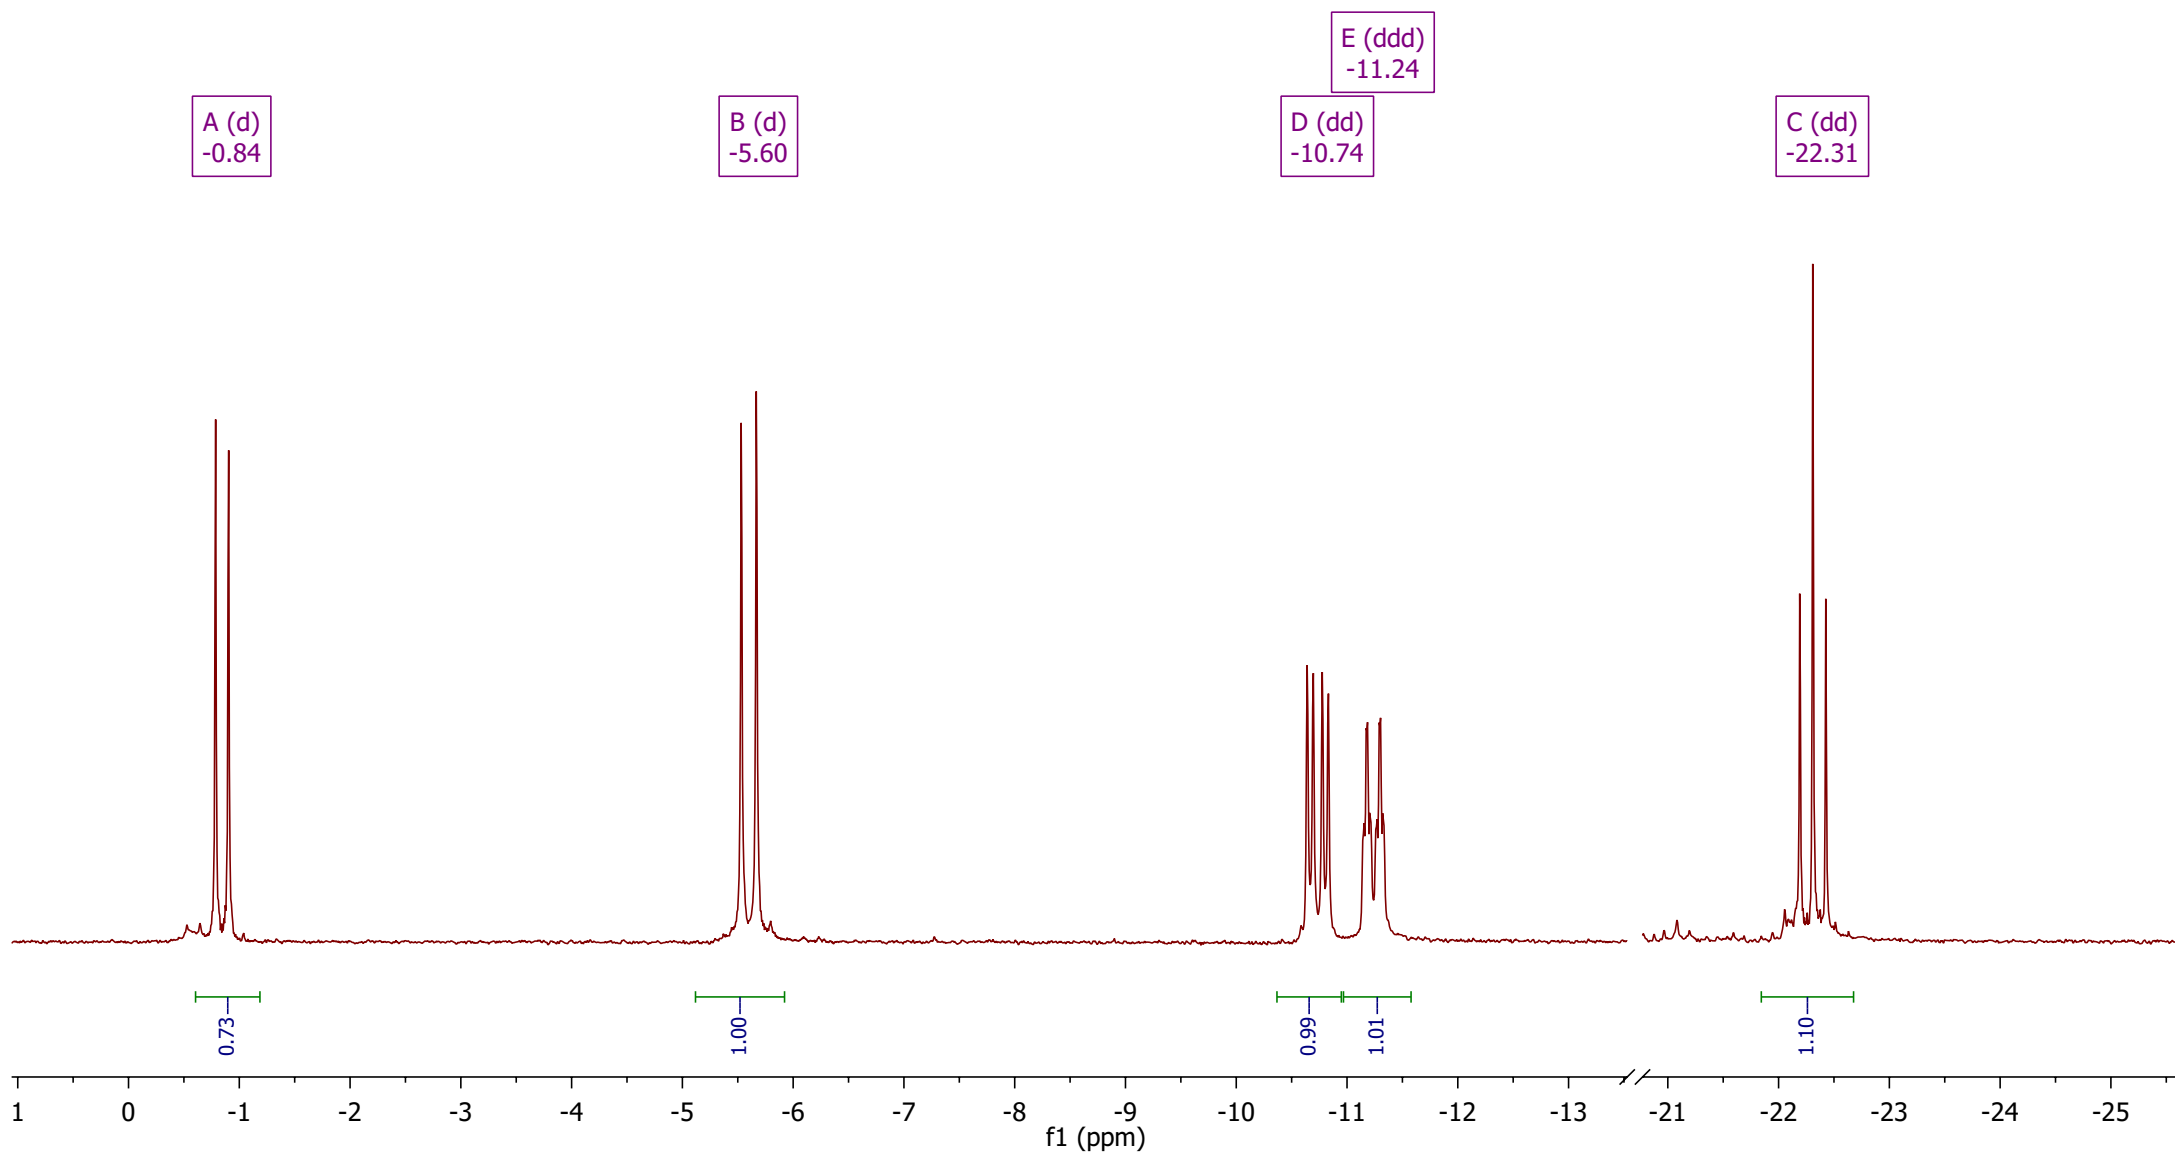

Compound 21 (amino-pppGpp), DQF-COSY (D<sub>2</sub>O)

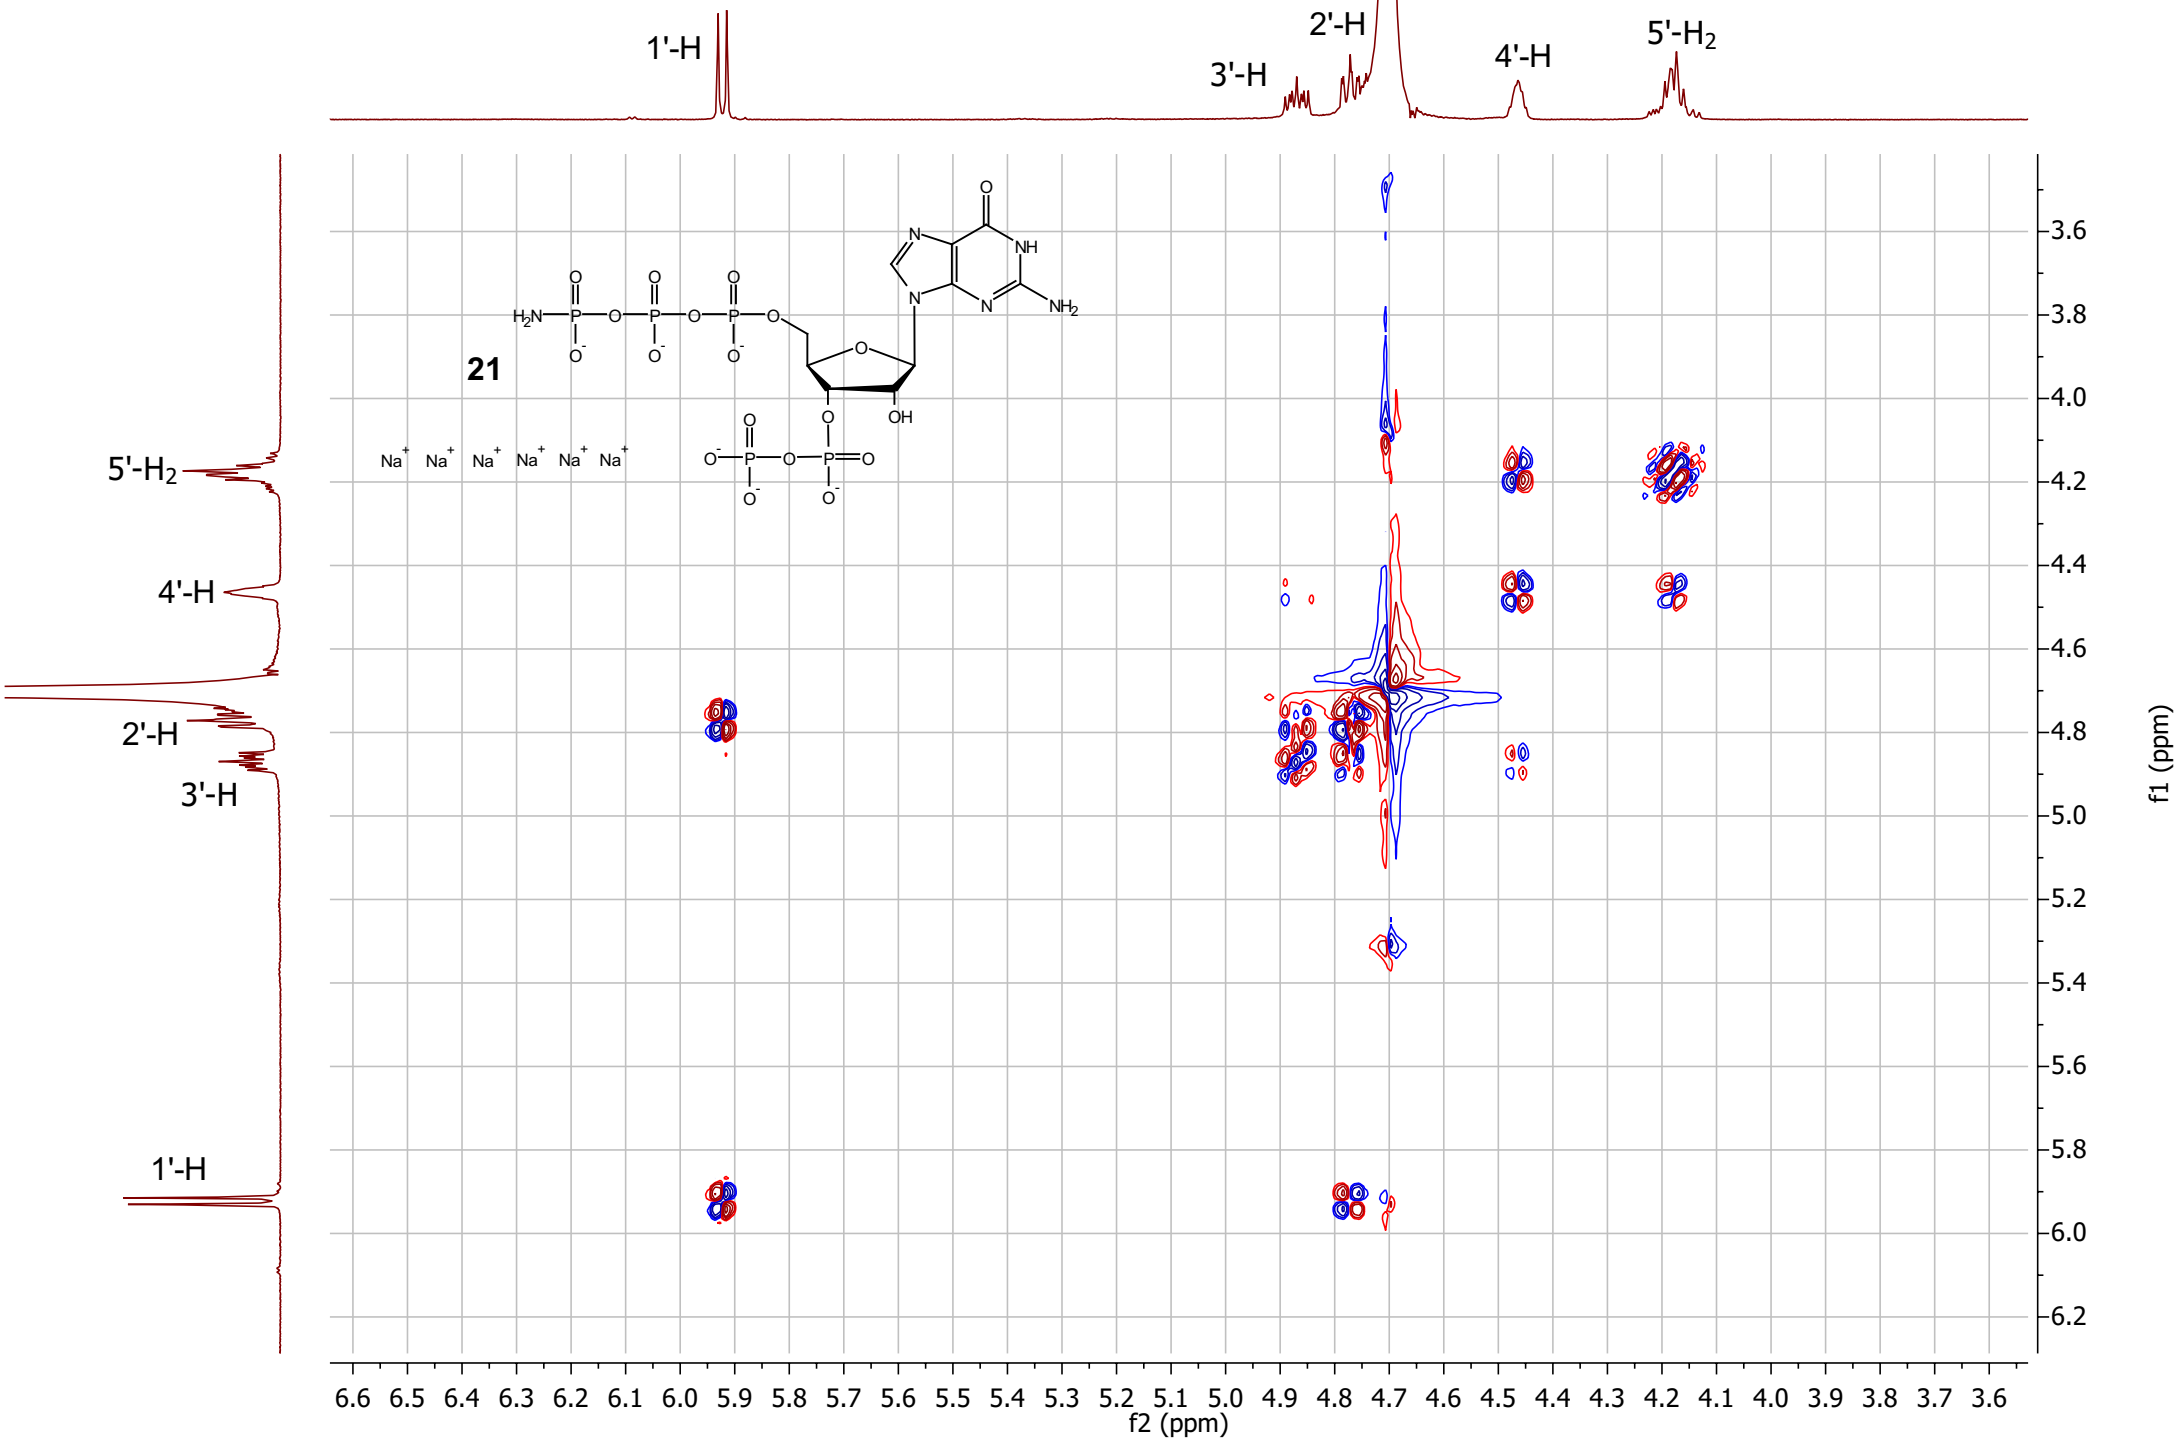

Compound 21 (amino-pppGpp), HSQC (D<sub>2</sub>O)

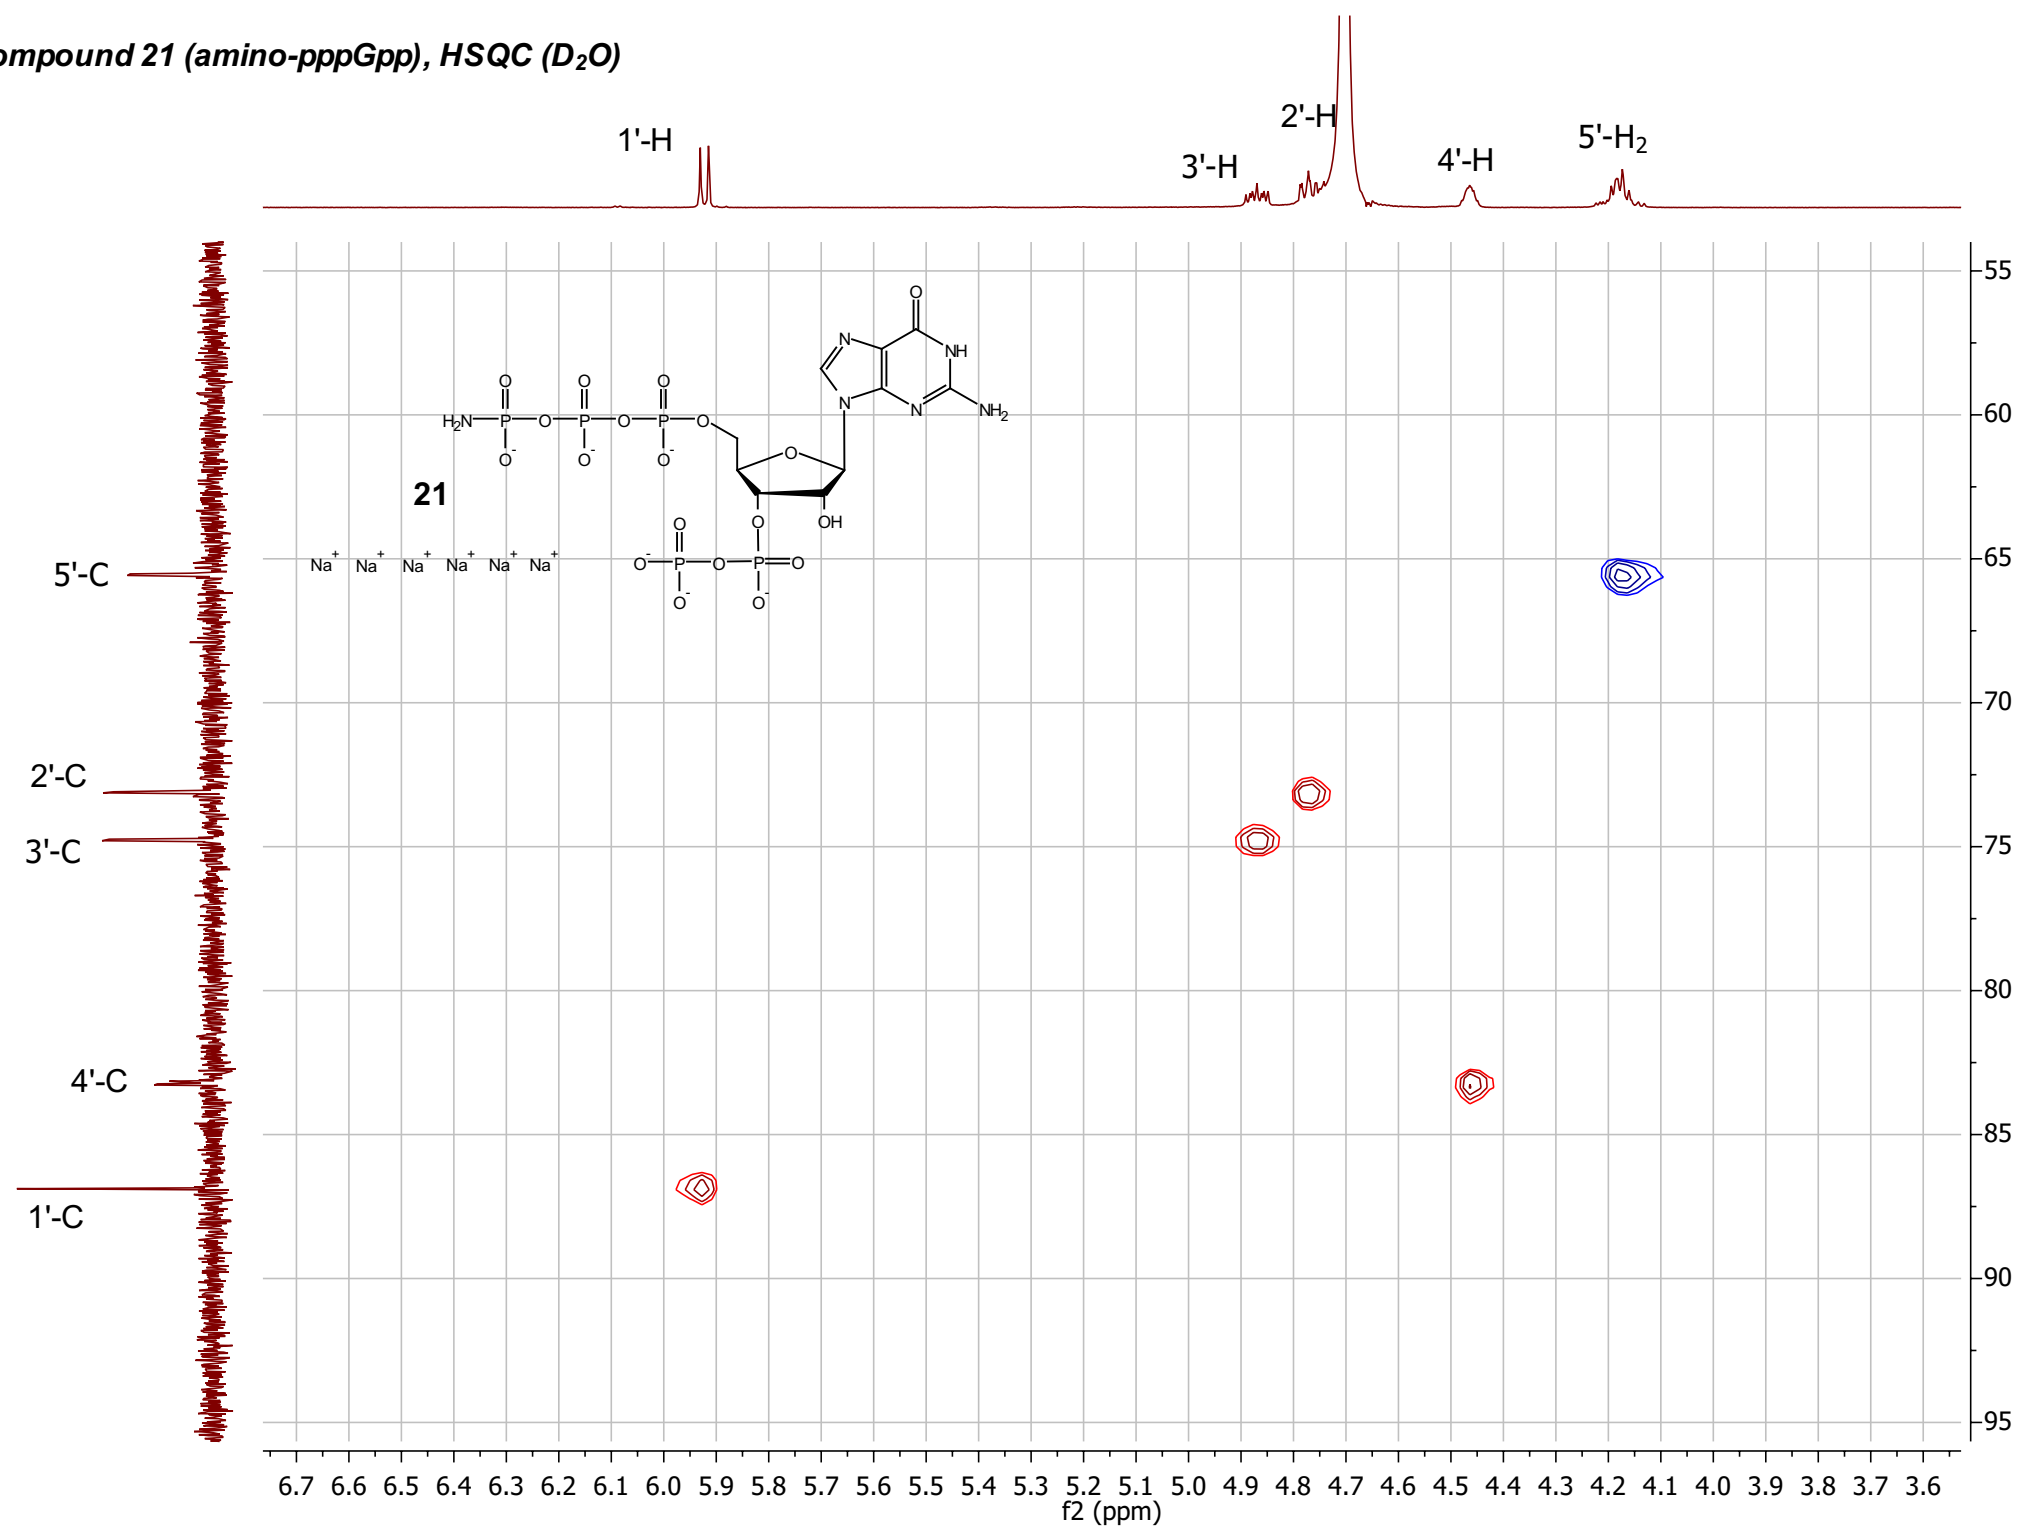

Compound 21 (amino-pppGpp), <sup>1</sup>H - <sup>31</sup>P - HMBC (D<sub>2</sub>O)

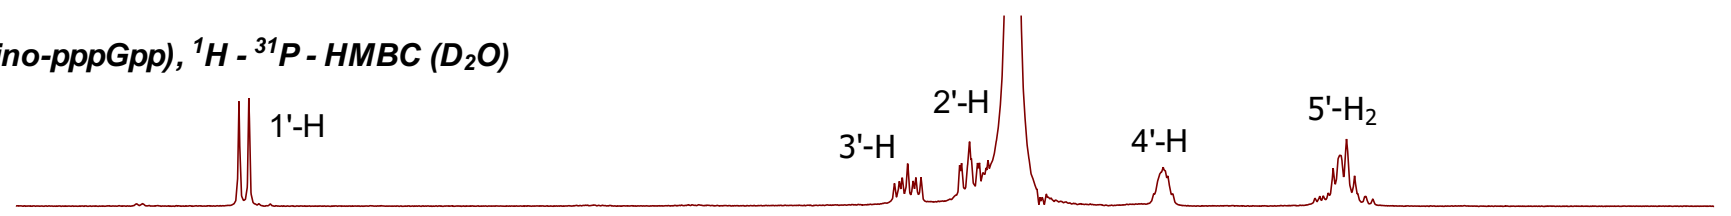

5'-P(b)

5'-P(a)

3'-P(a)

3'-P(b)

5'-P(c)

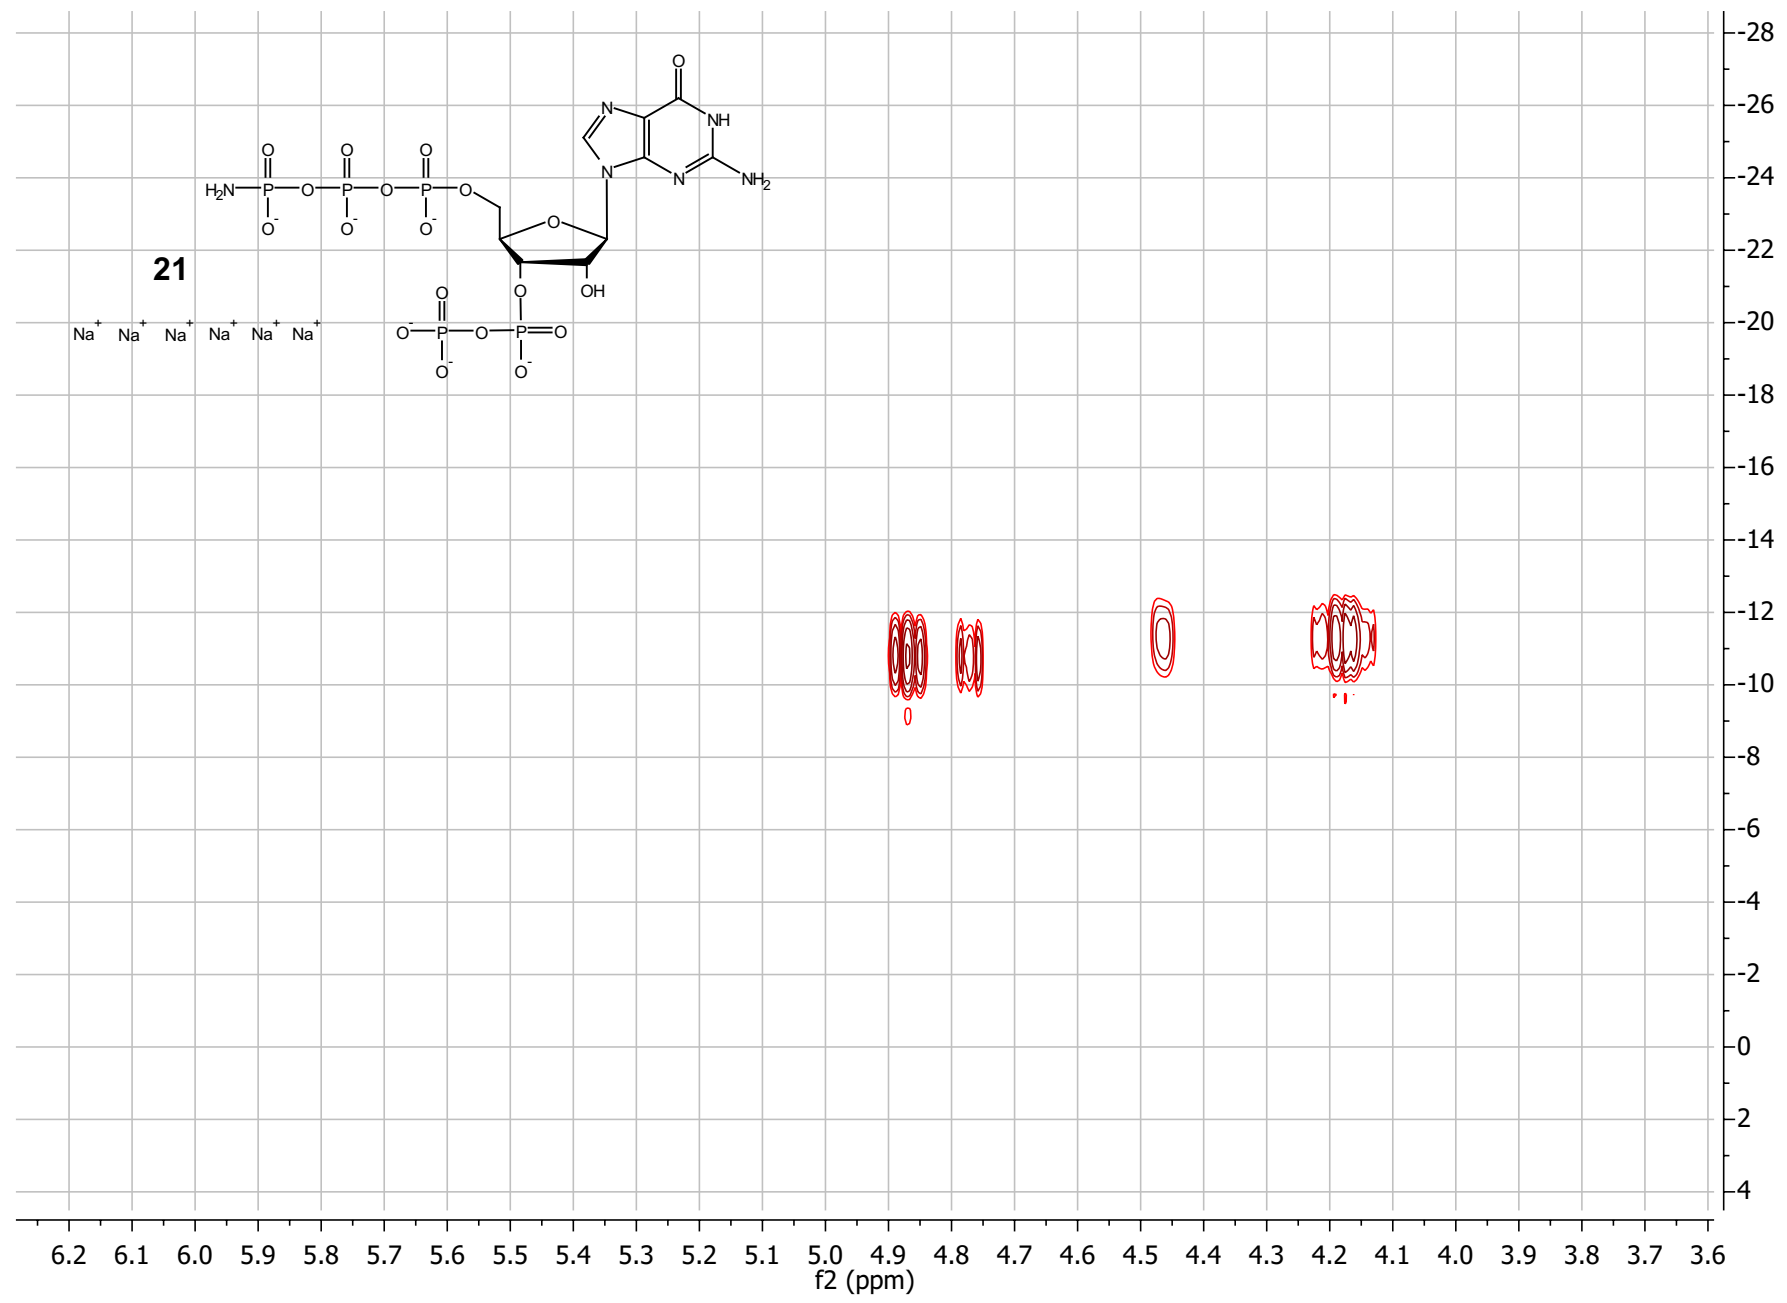

f1 (ppm)

f2 (ppm)

Compound 21 (amino-pppGpp), PP - COSY (D<sub>2</sub>O)

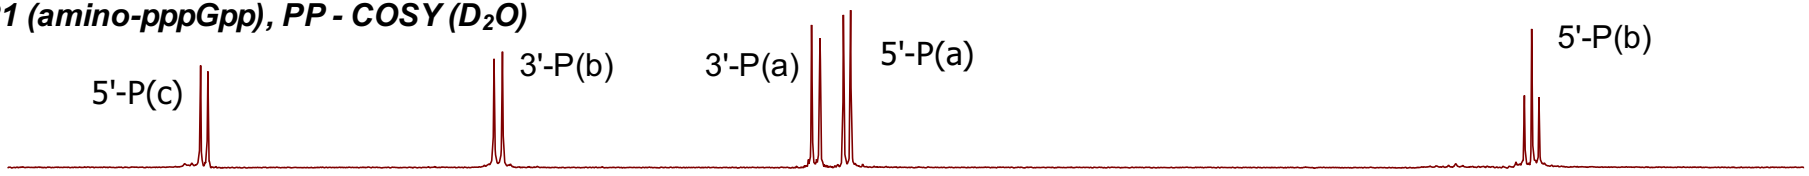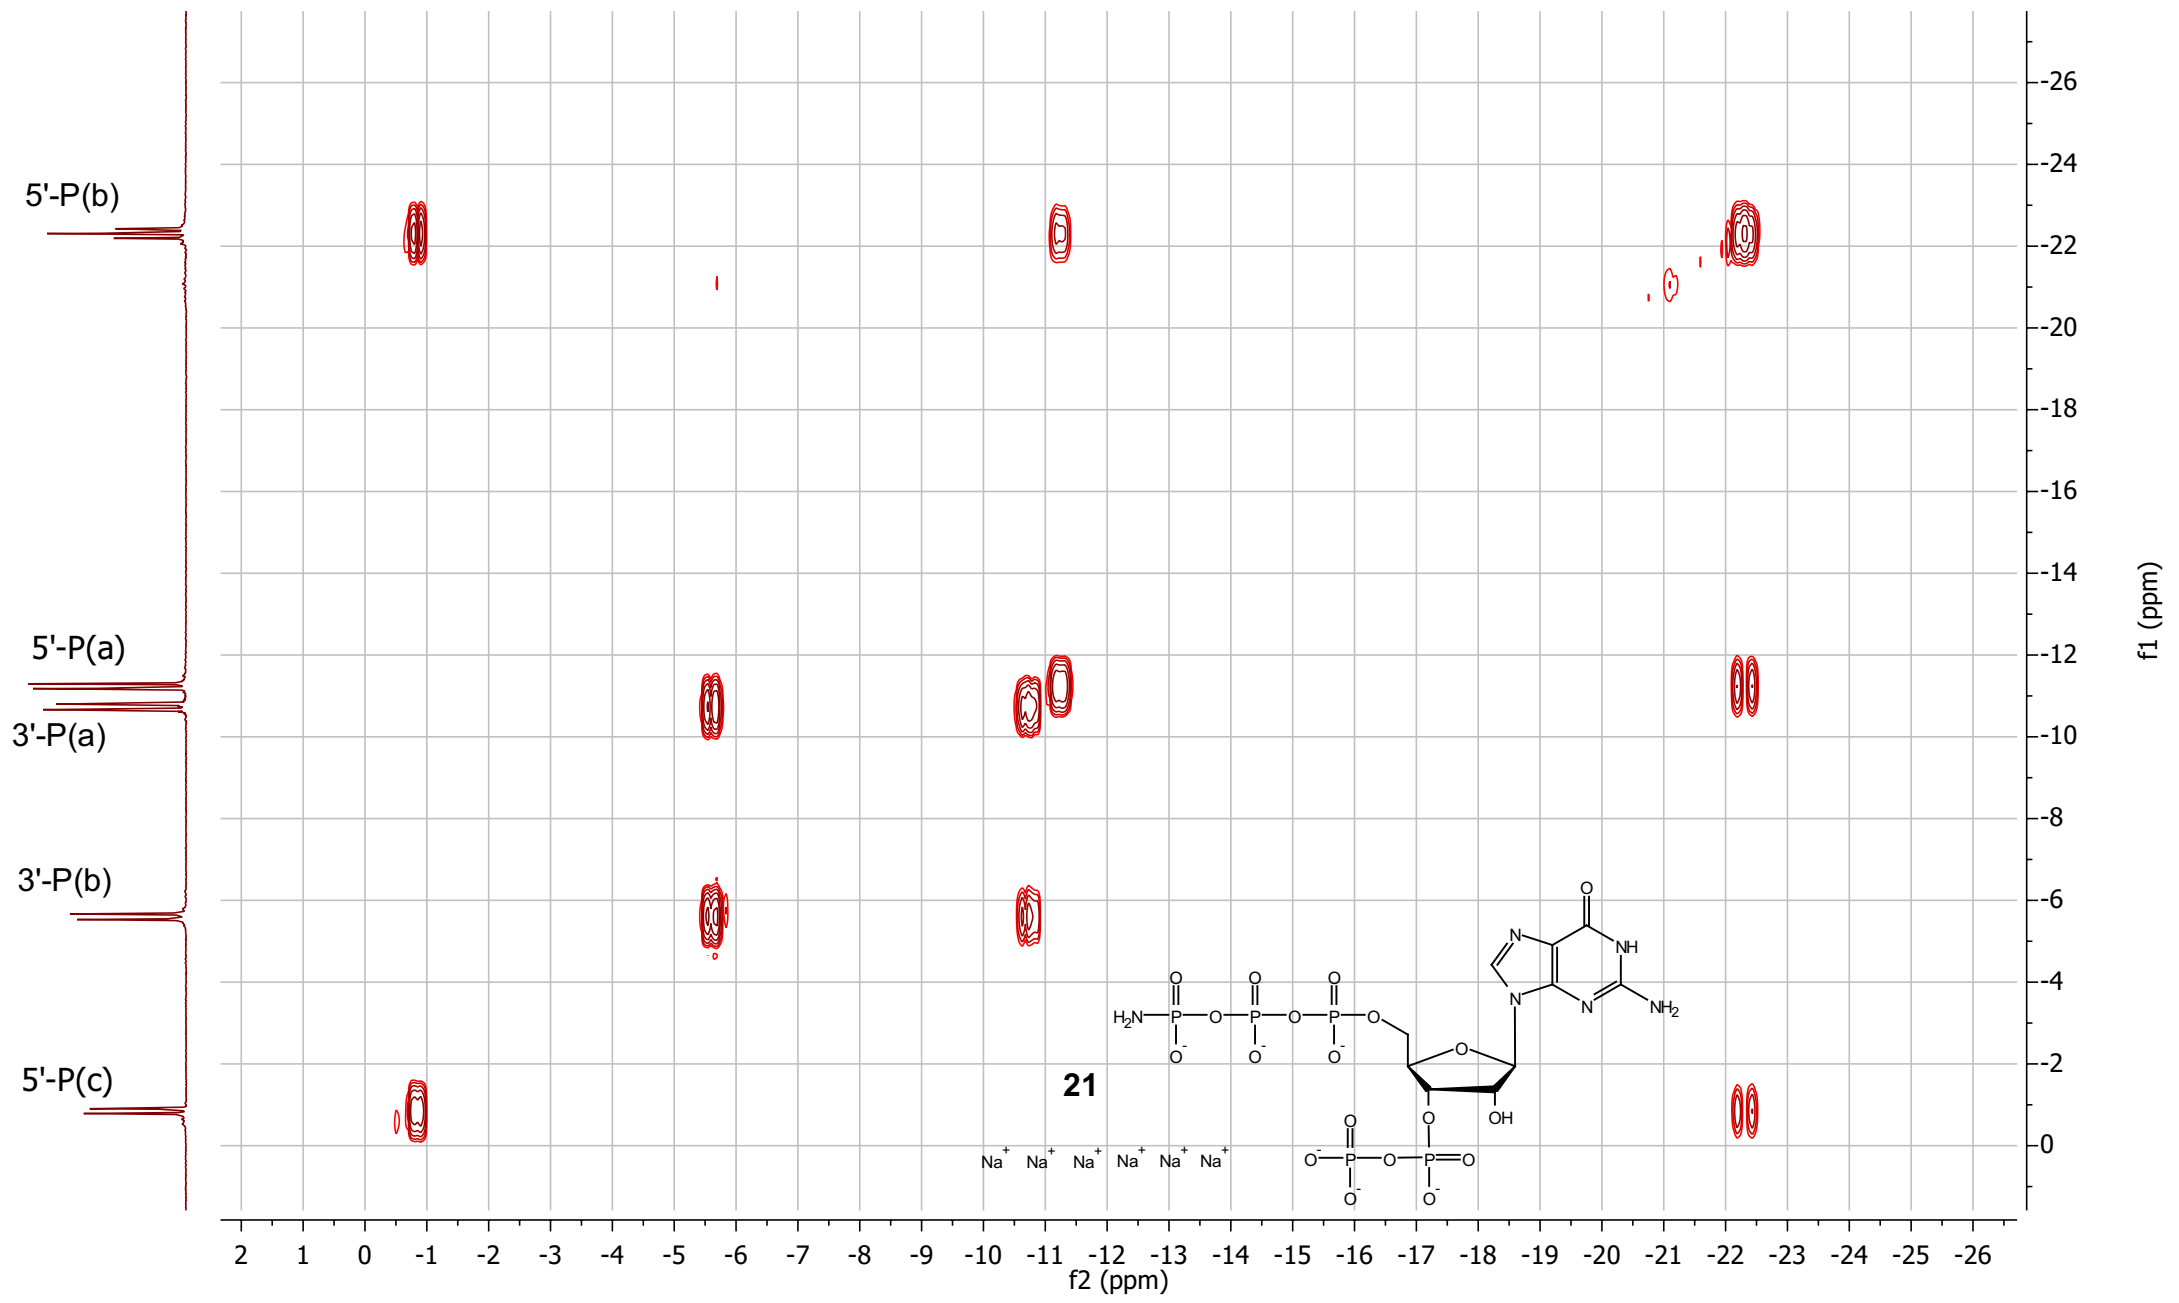

Compound 21 (amido-pppGpp),  $^{13}\text{C}$   $\{^1\text{H}\}$  - NMR ( $\text{D}_2\text{O}$ , 101 MHz)

S - 78

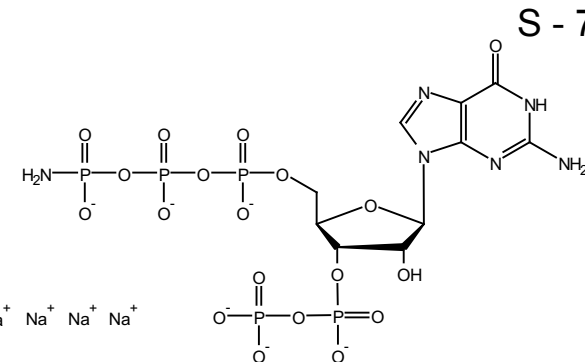

21

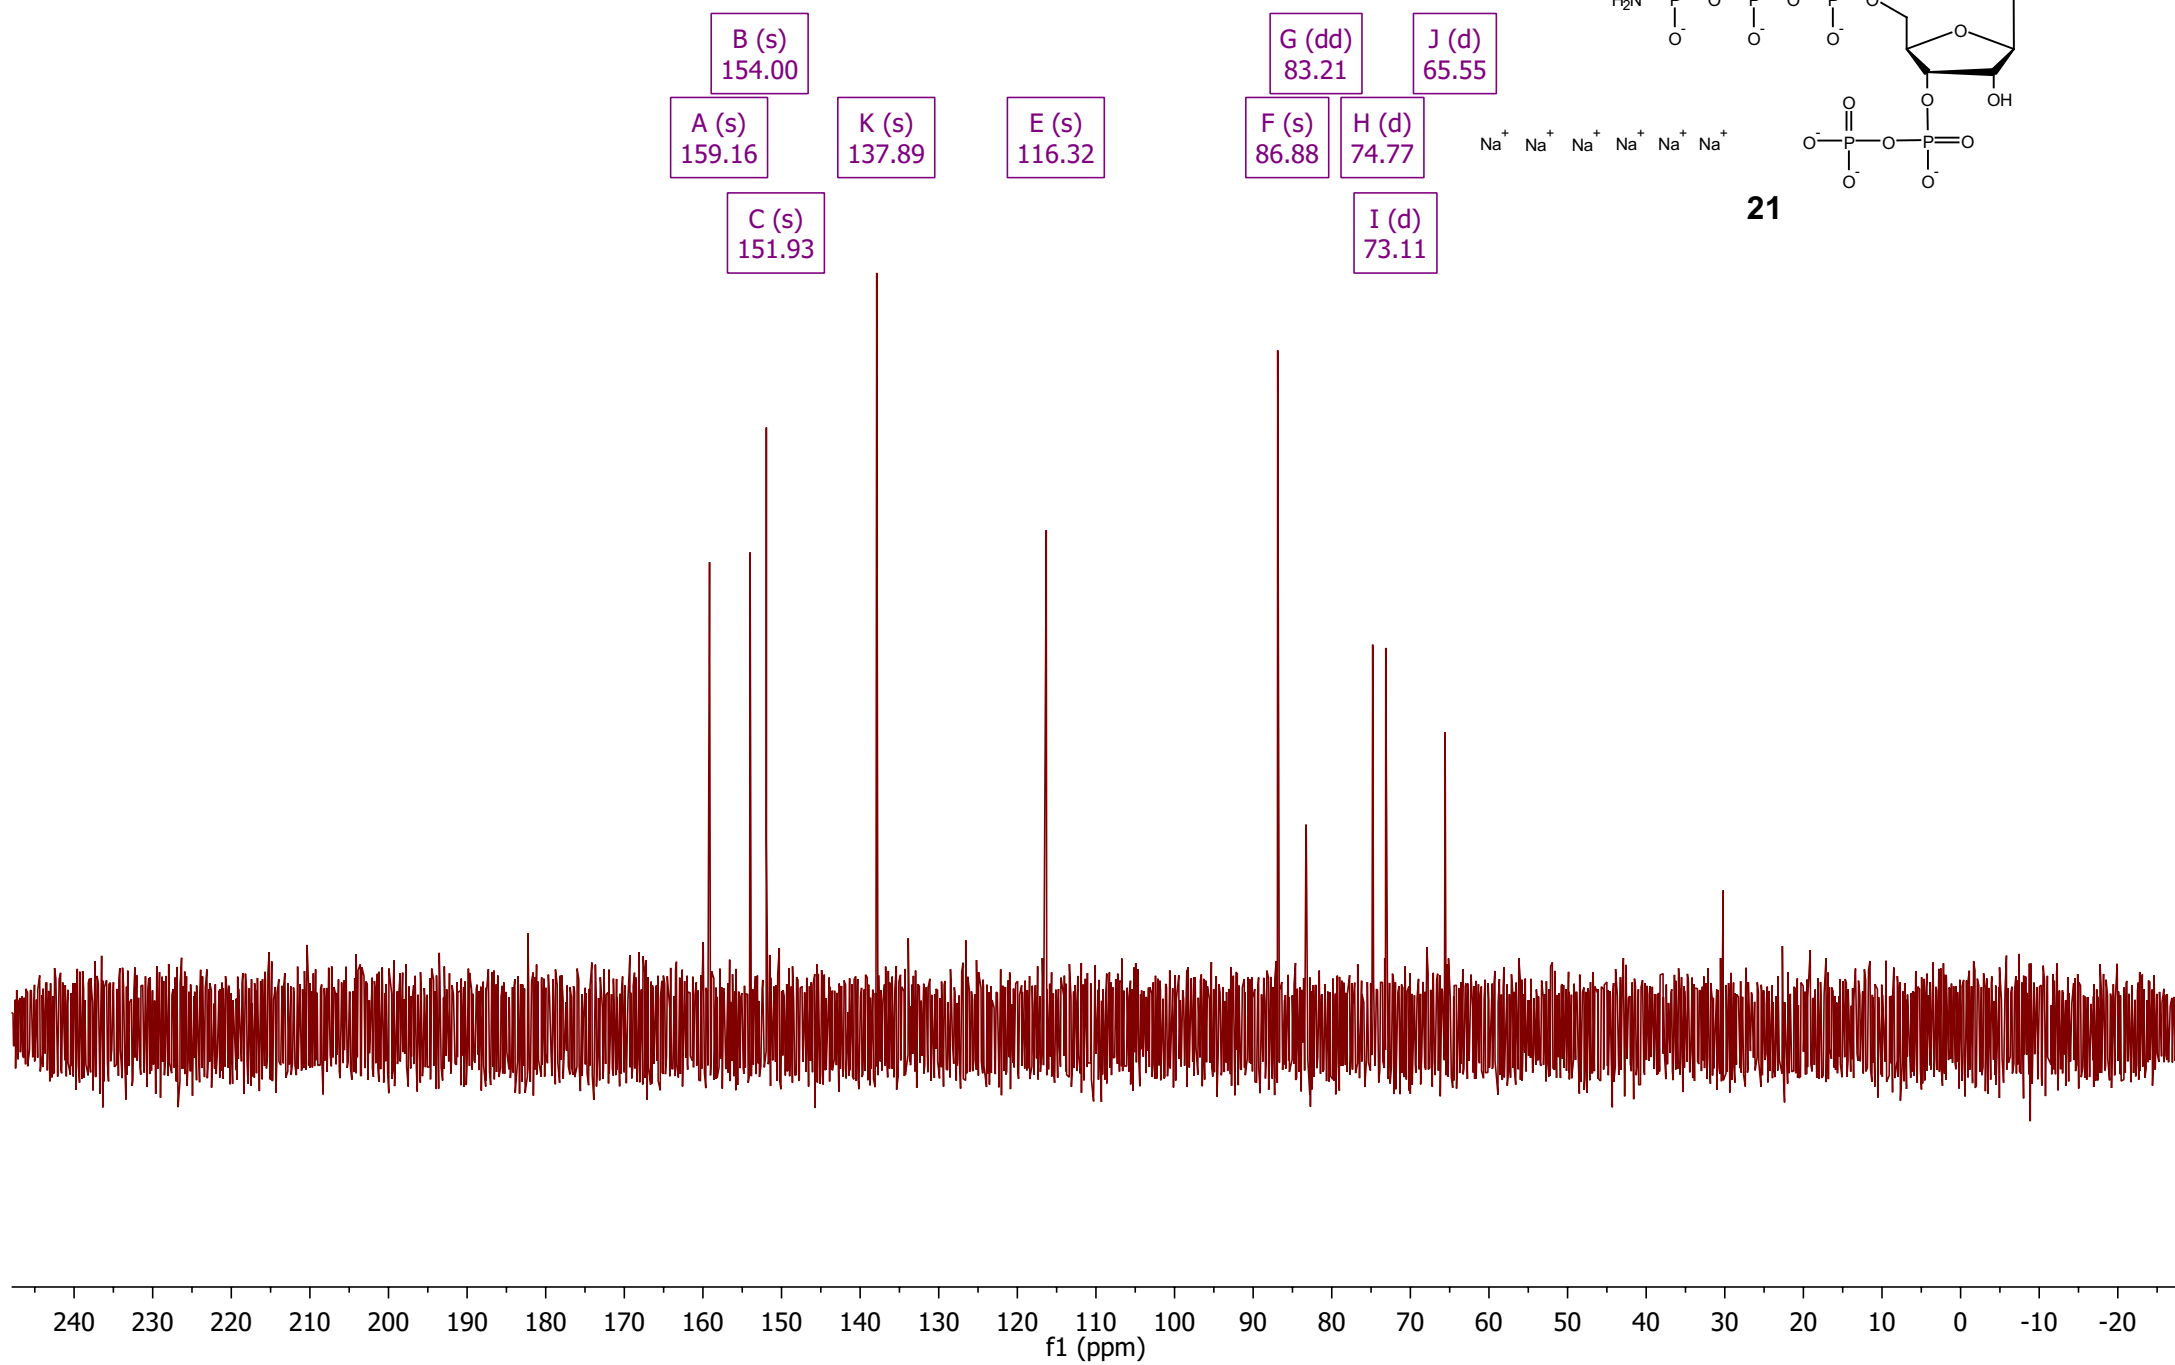

Compound 4 (pppApp),  $^1\text{H}$  - NMR ( $\text{D}_2\text{O}$ , 400 MHz)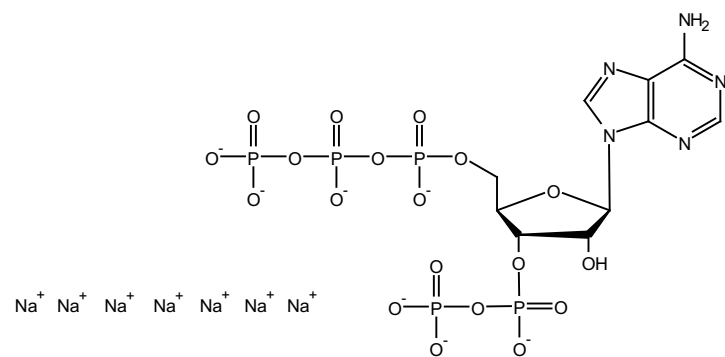**4**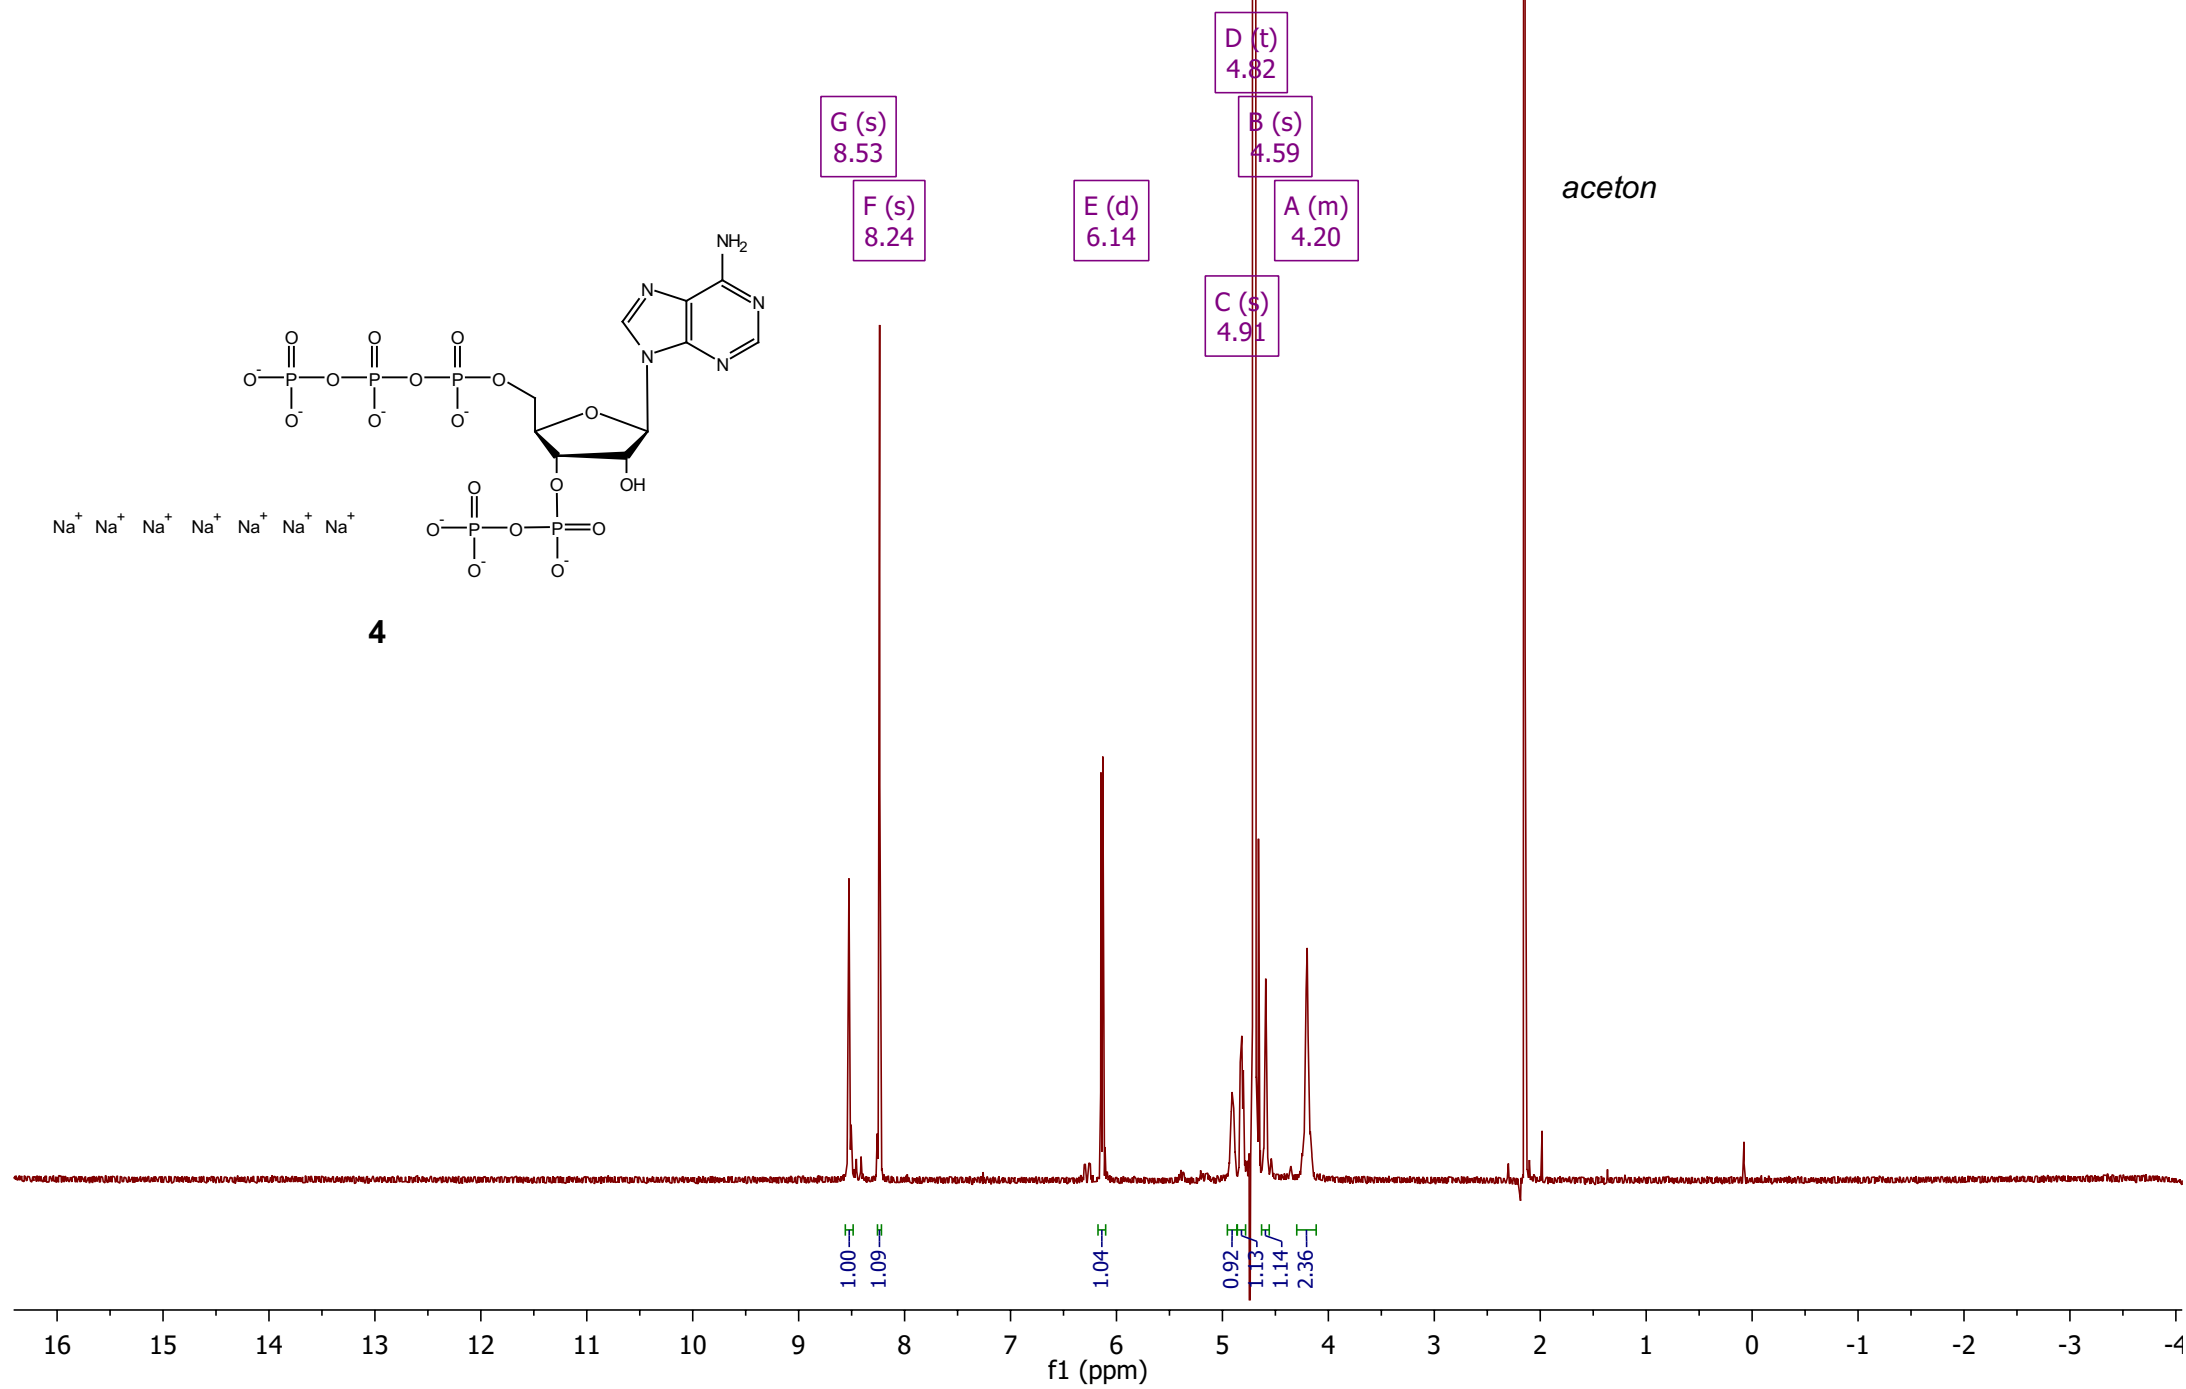



Compound 4 (pppApp),  $^{31}\text{P}$   $\{^1\text{H}\}$  - NMR ( $\text{D}_2\text{O}$ , 162 MHz)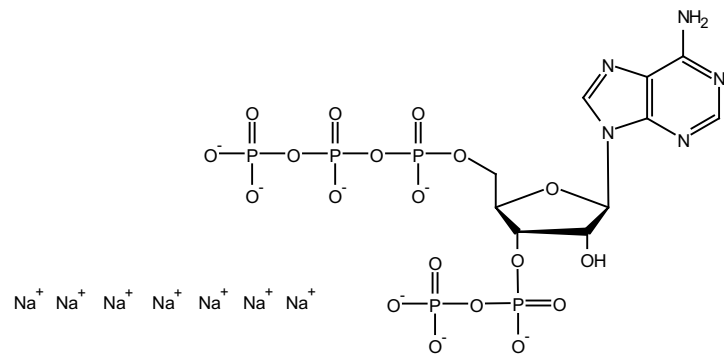**4**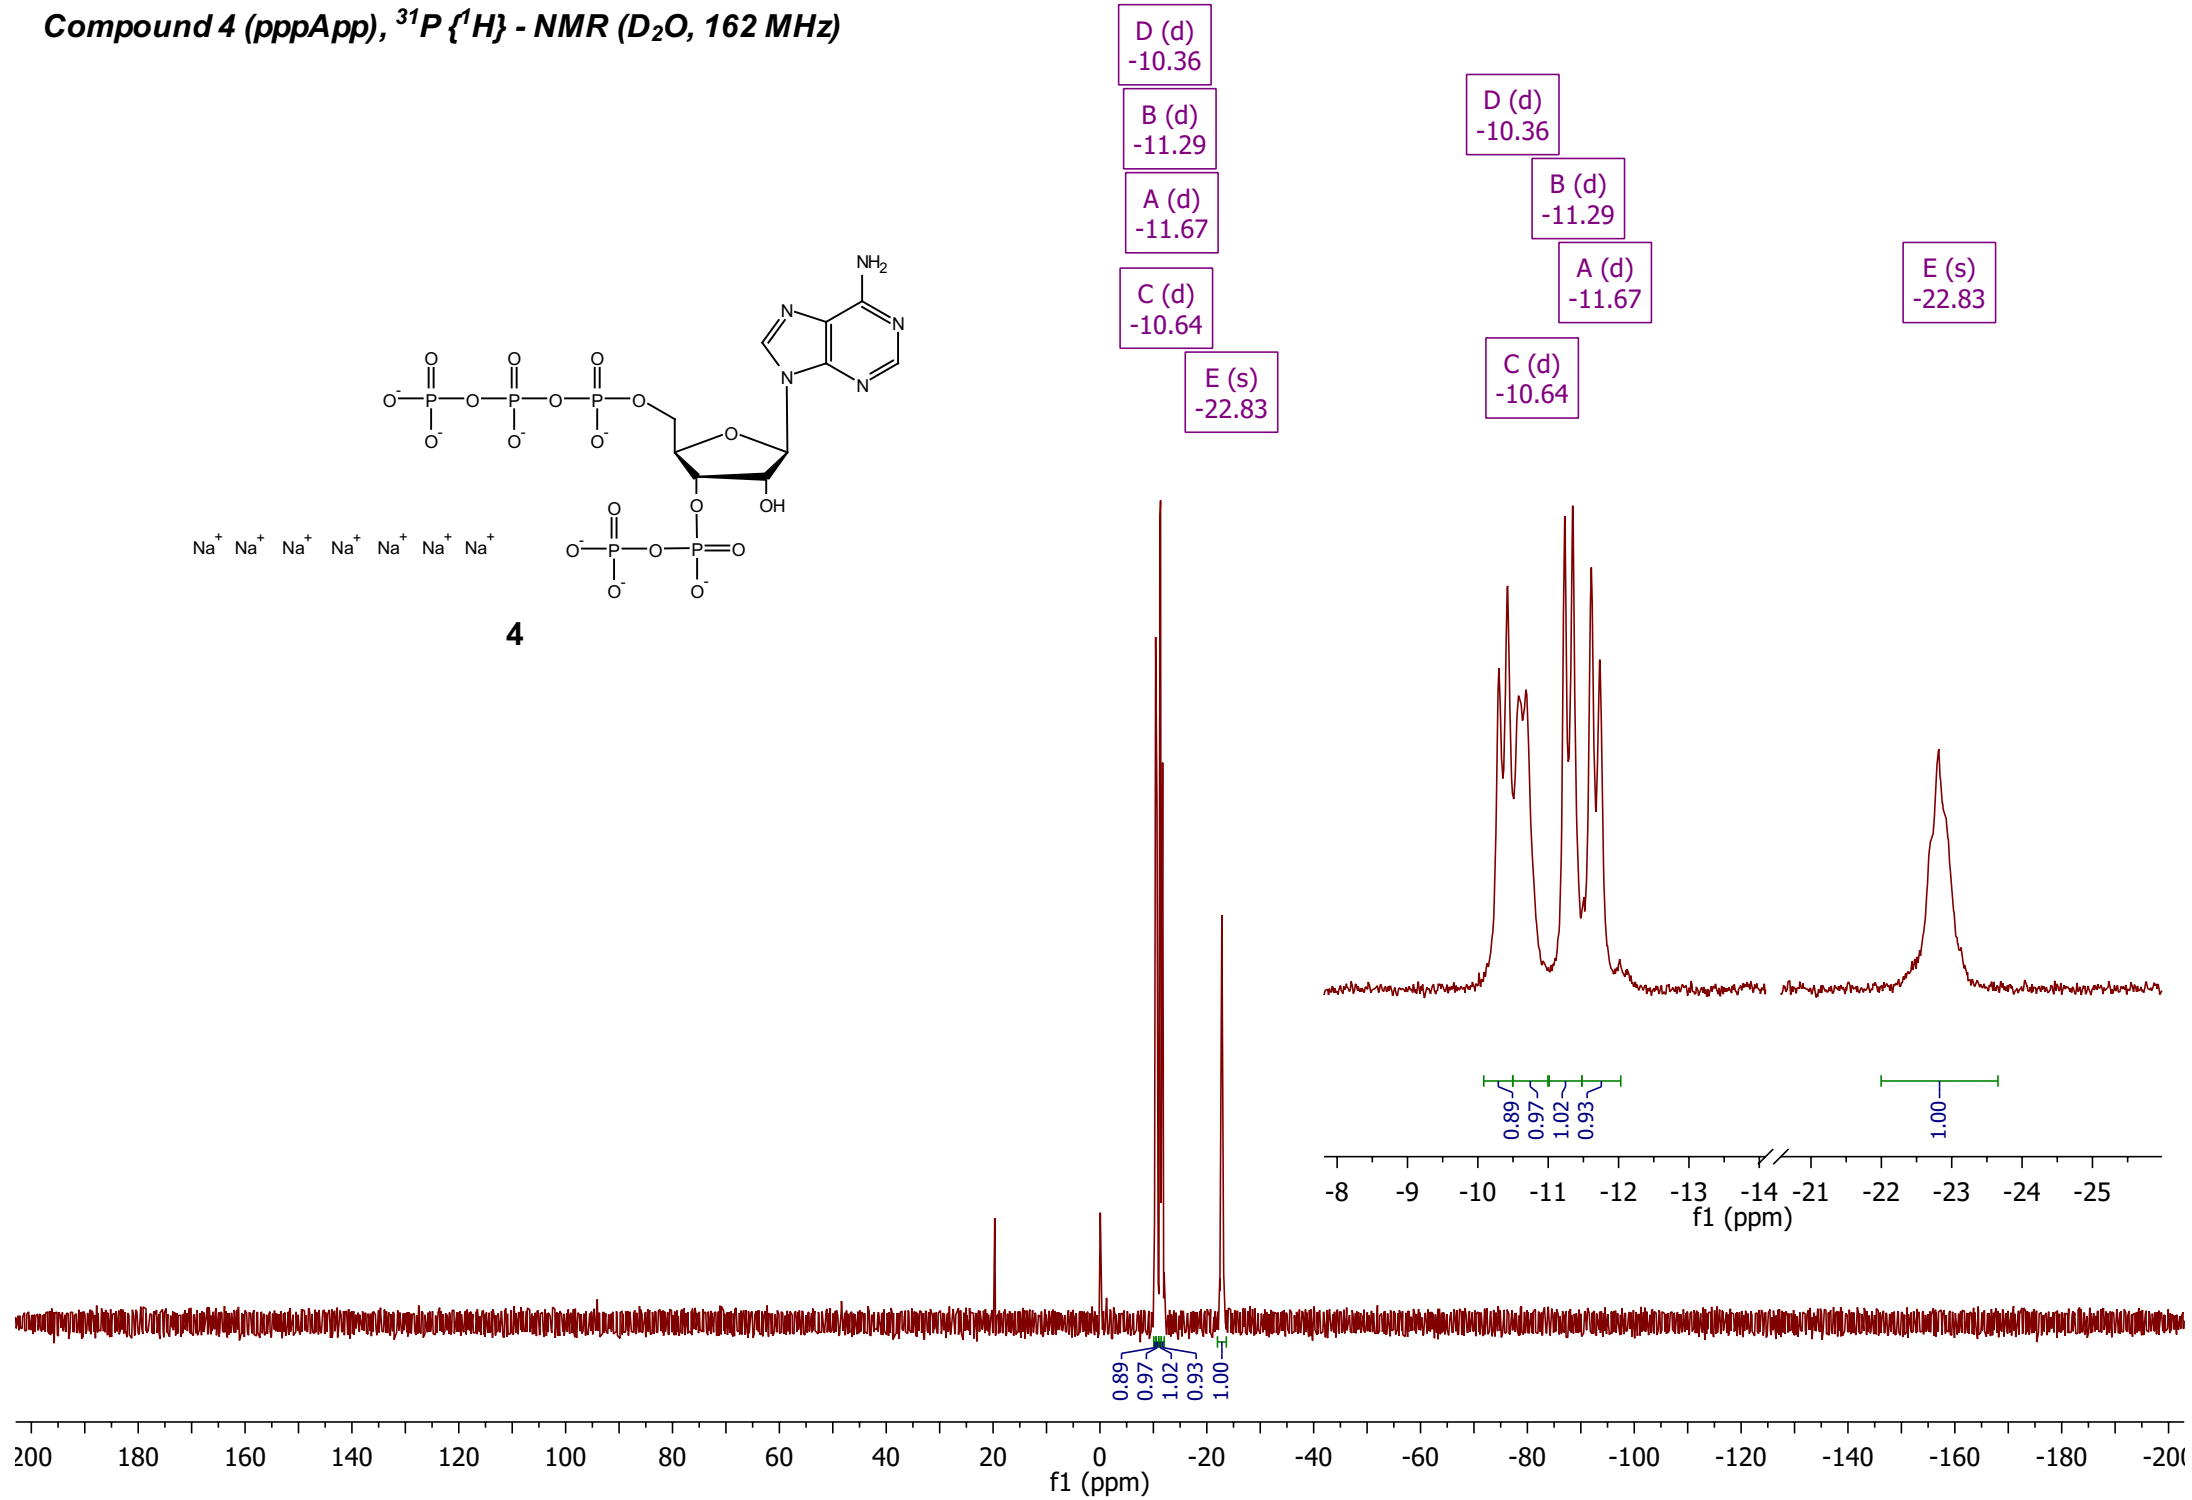



Compound 4 (pppApp), HSQC (D<sub>2</sub>O, 162 MHz)

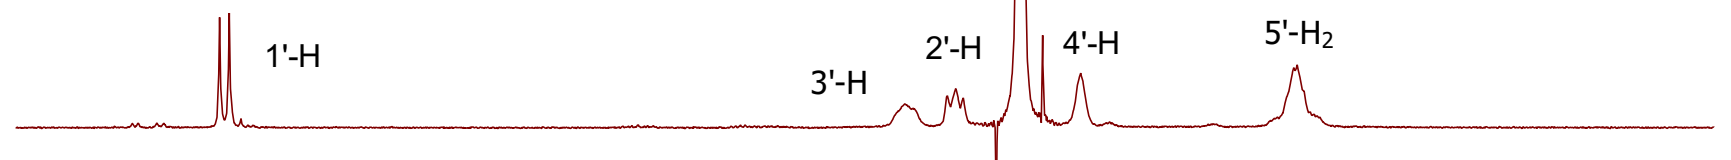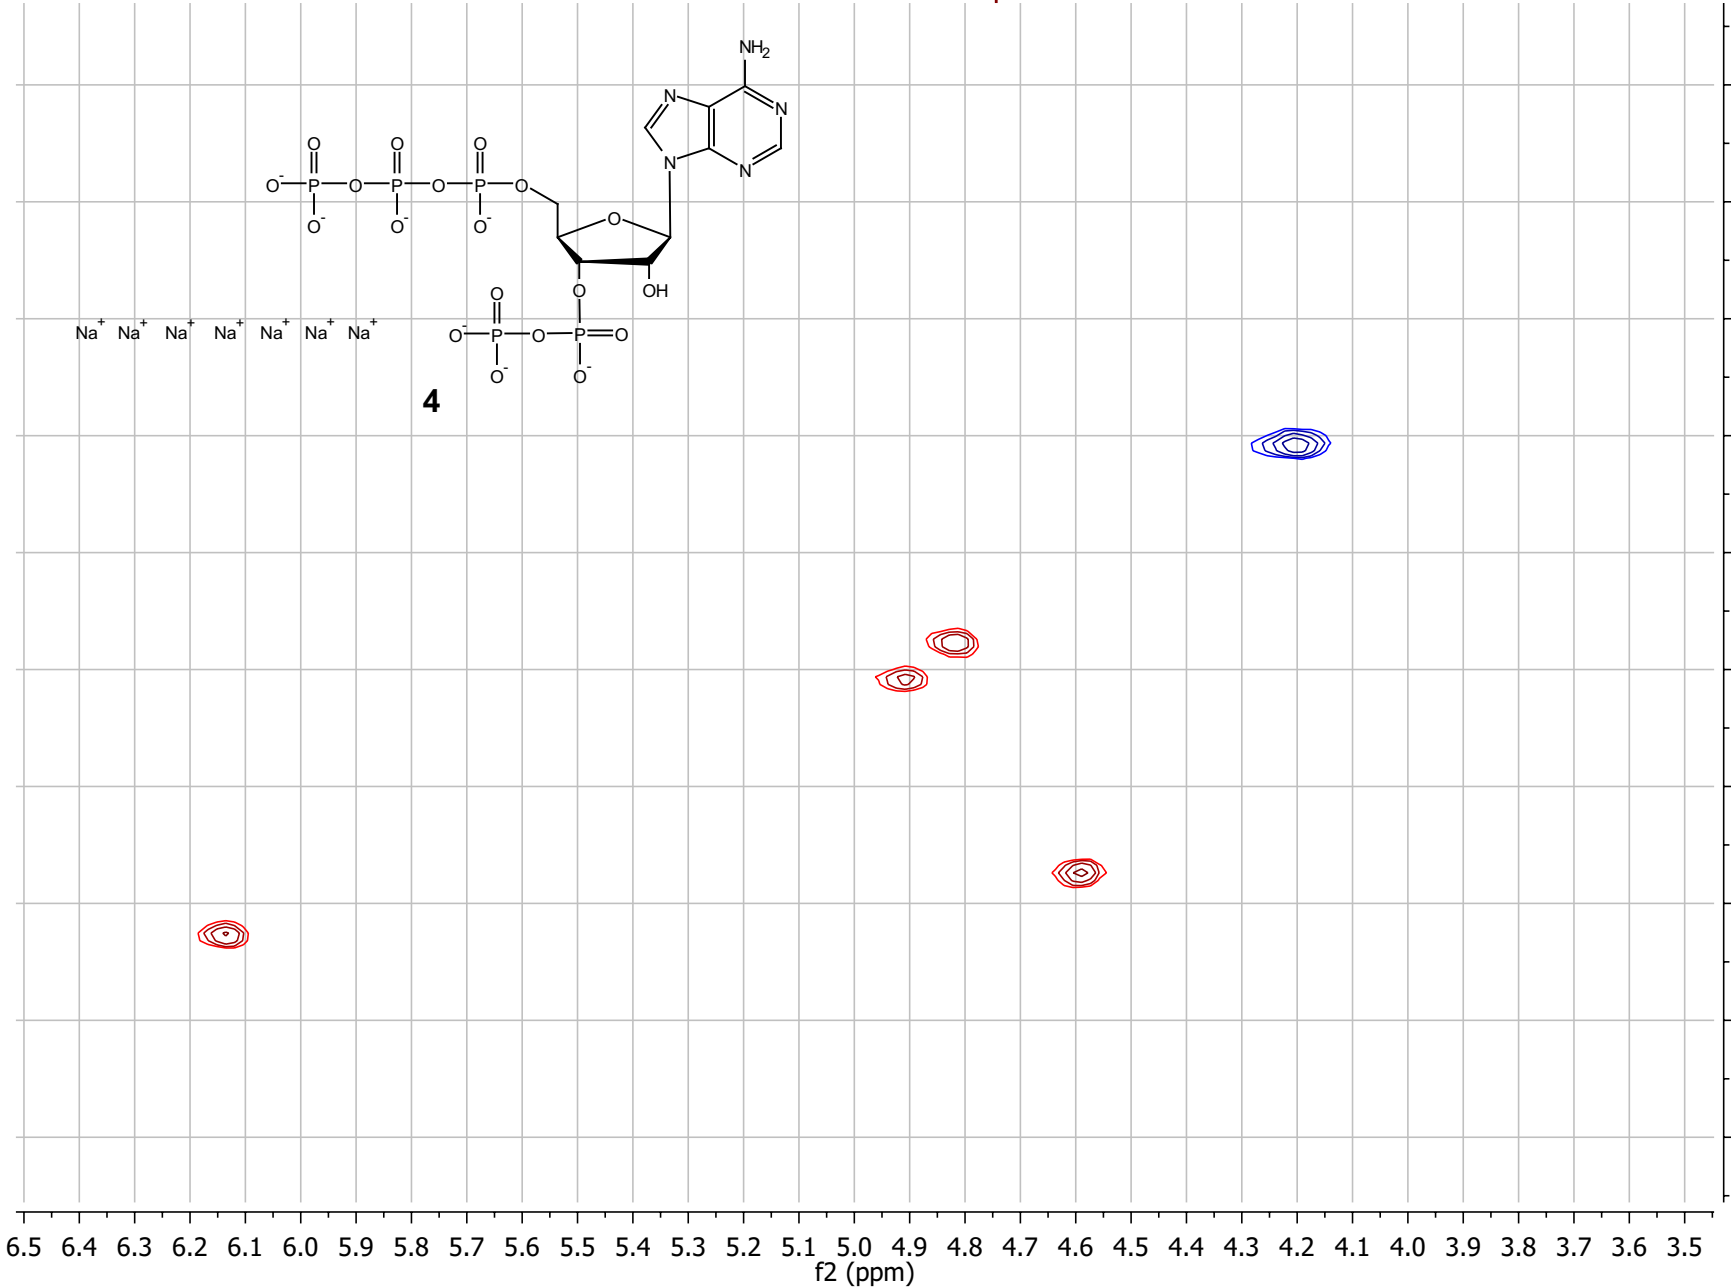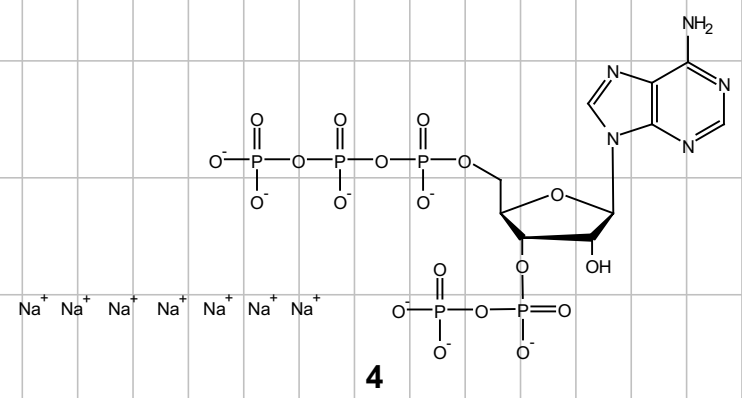

5'-C  
2'-C  
3'-C  
4'-C  
1'-C

f1 (ppm)

f2 (ppm)

Compound 4 (pppApp), <sup>1</sup>H - <sup>31</sup>P - HMBC (D<sub>2</sub>O, 162 MHz)

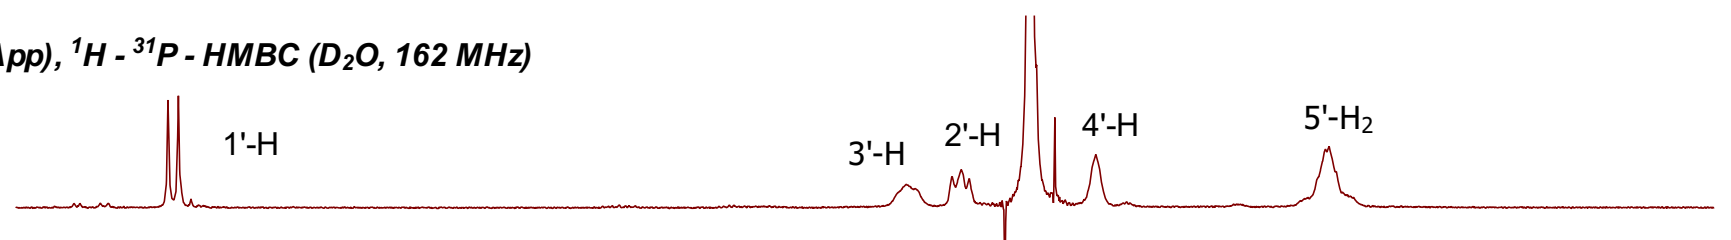

5'-P(b)

3'-P(a)  
5'-P(a)

5'-P(c)  
3'-P(b)

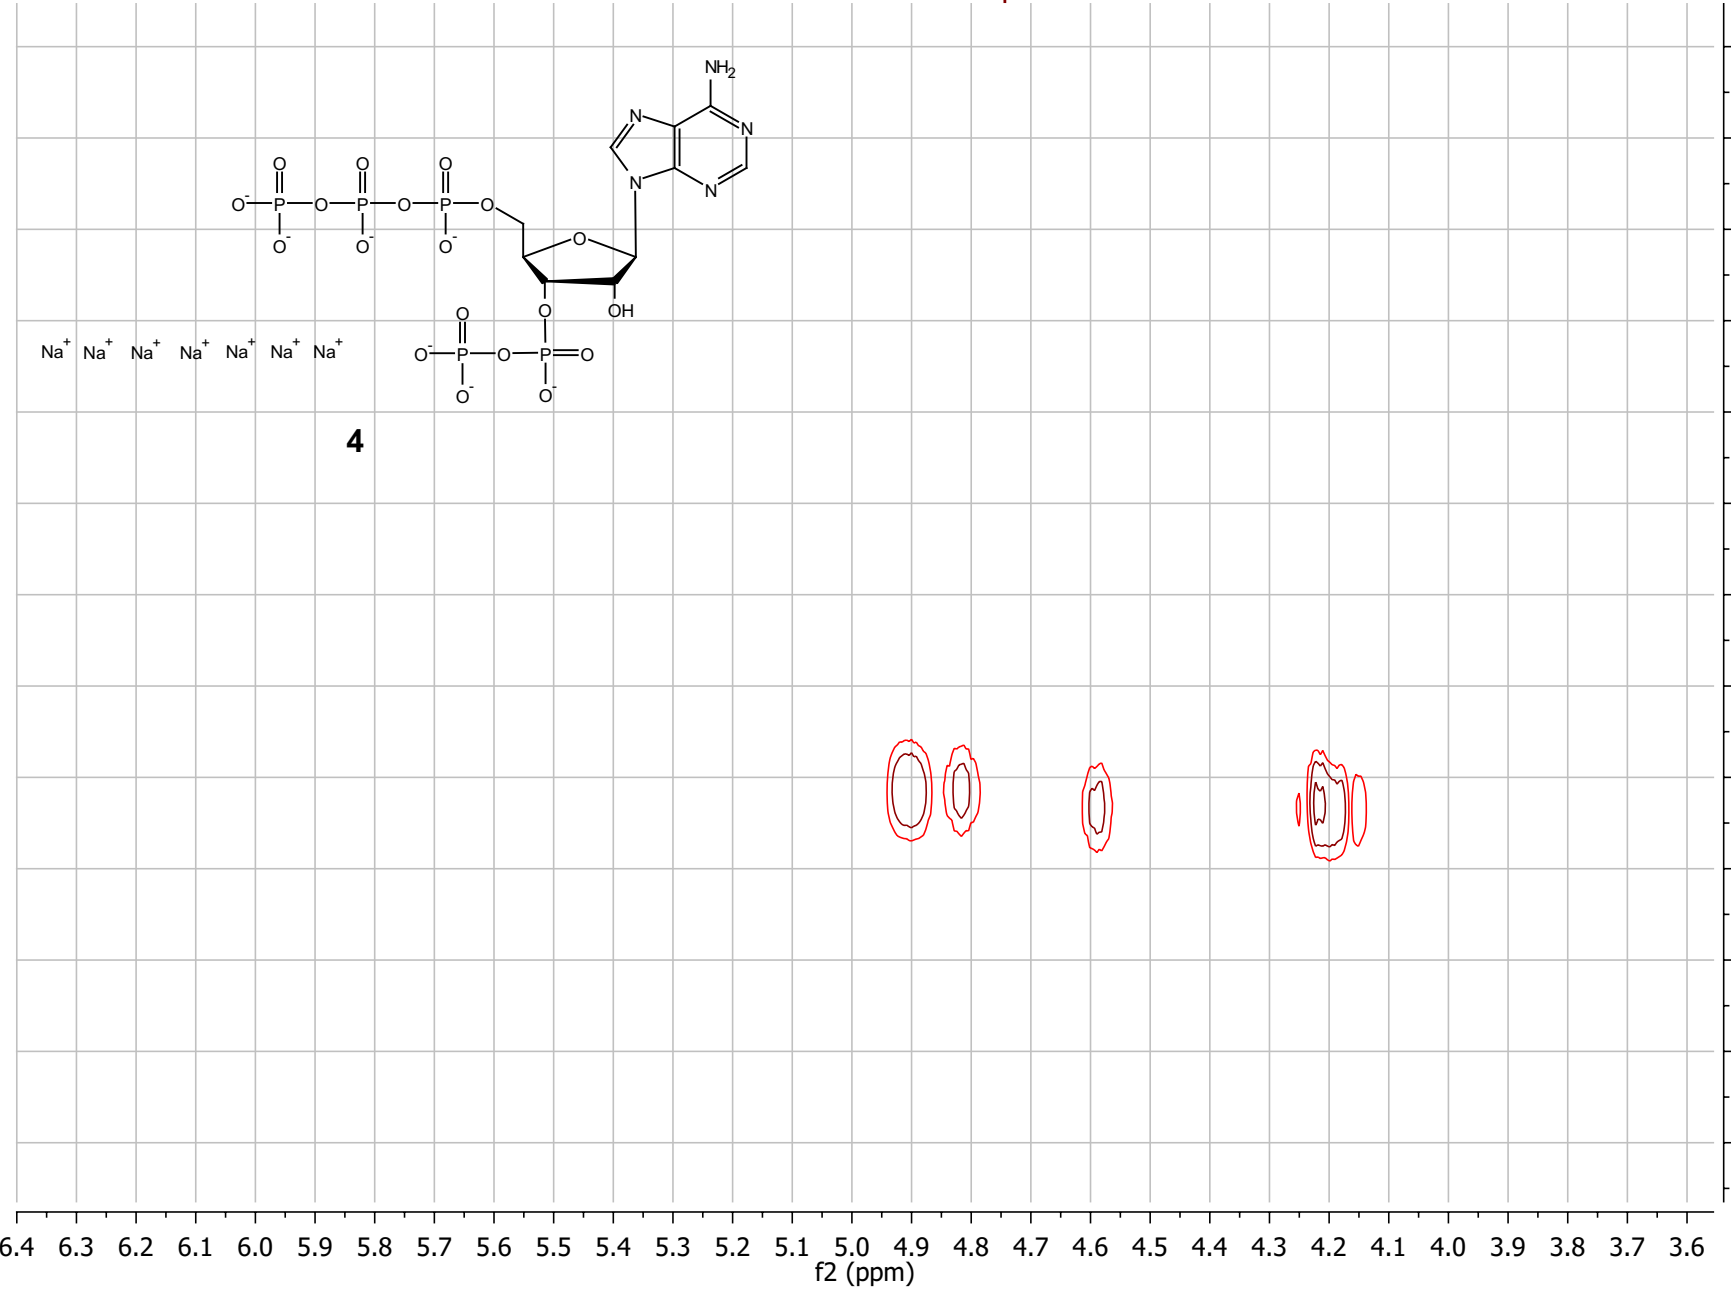

f1 (ppm)

f2 (ppm)



**Compound 4 (pppApp),  $^{13}\text{C}$   $\{^1\text{H}\}$  ( $\text{D}_2\text{O}$ , 162 MHz)**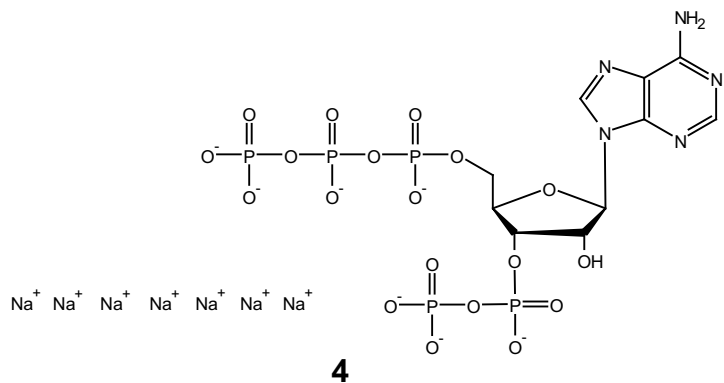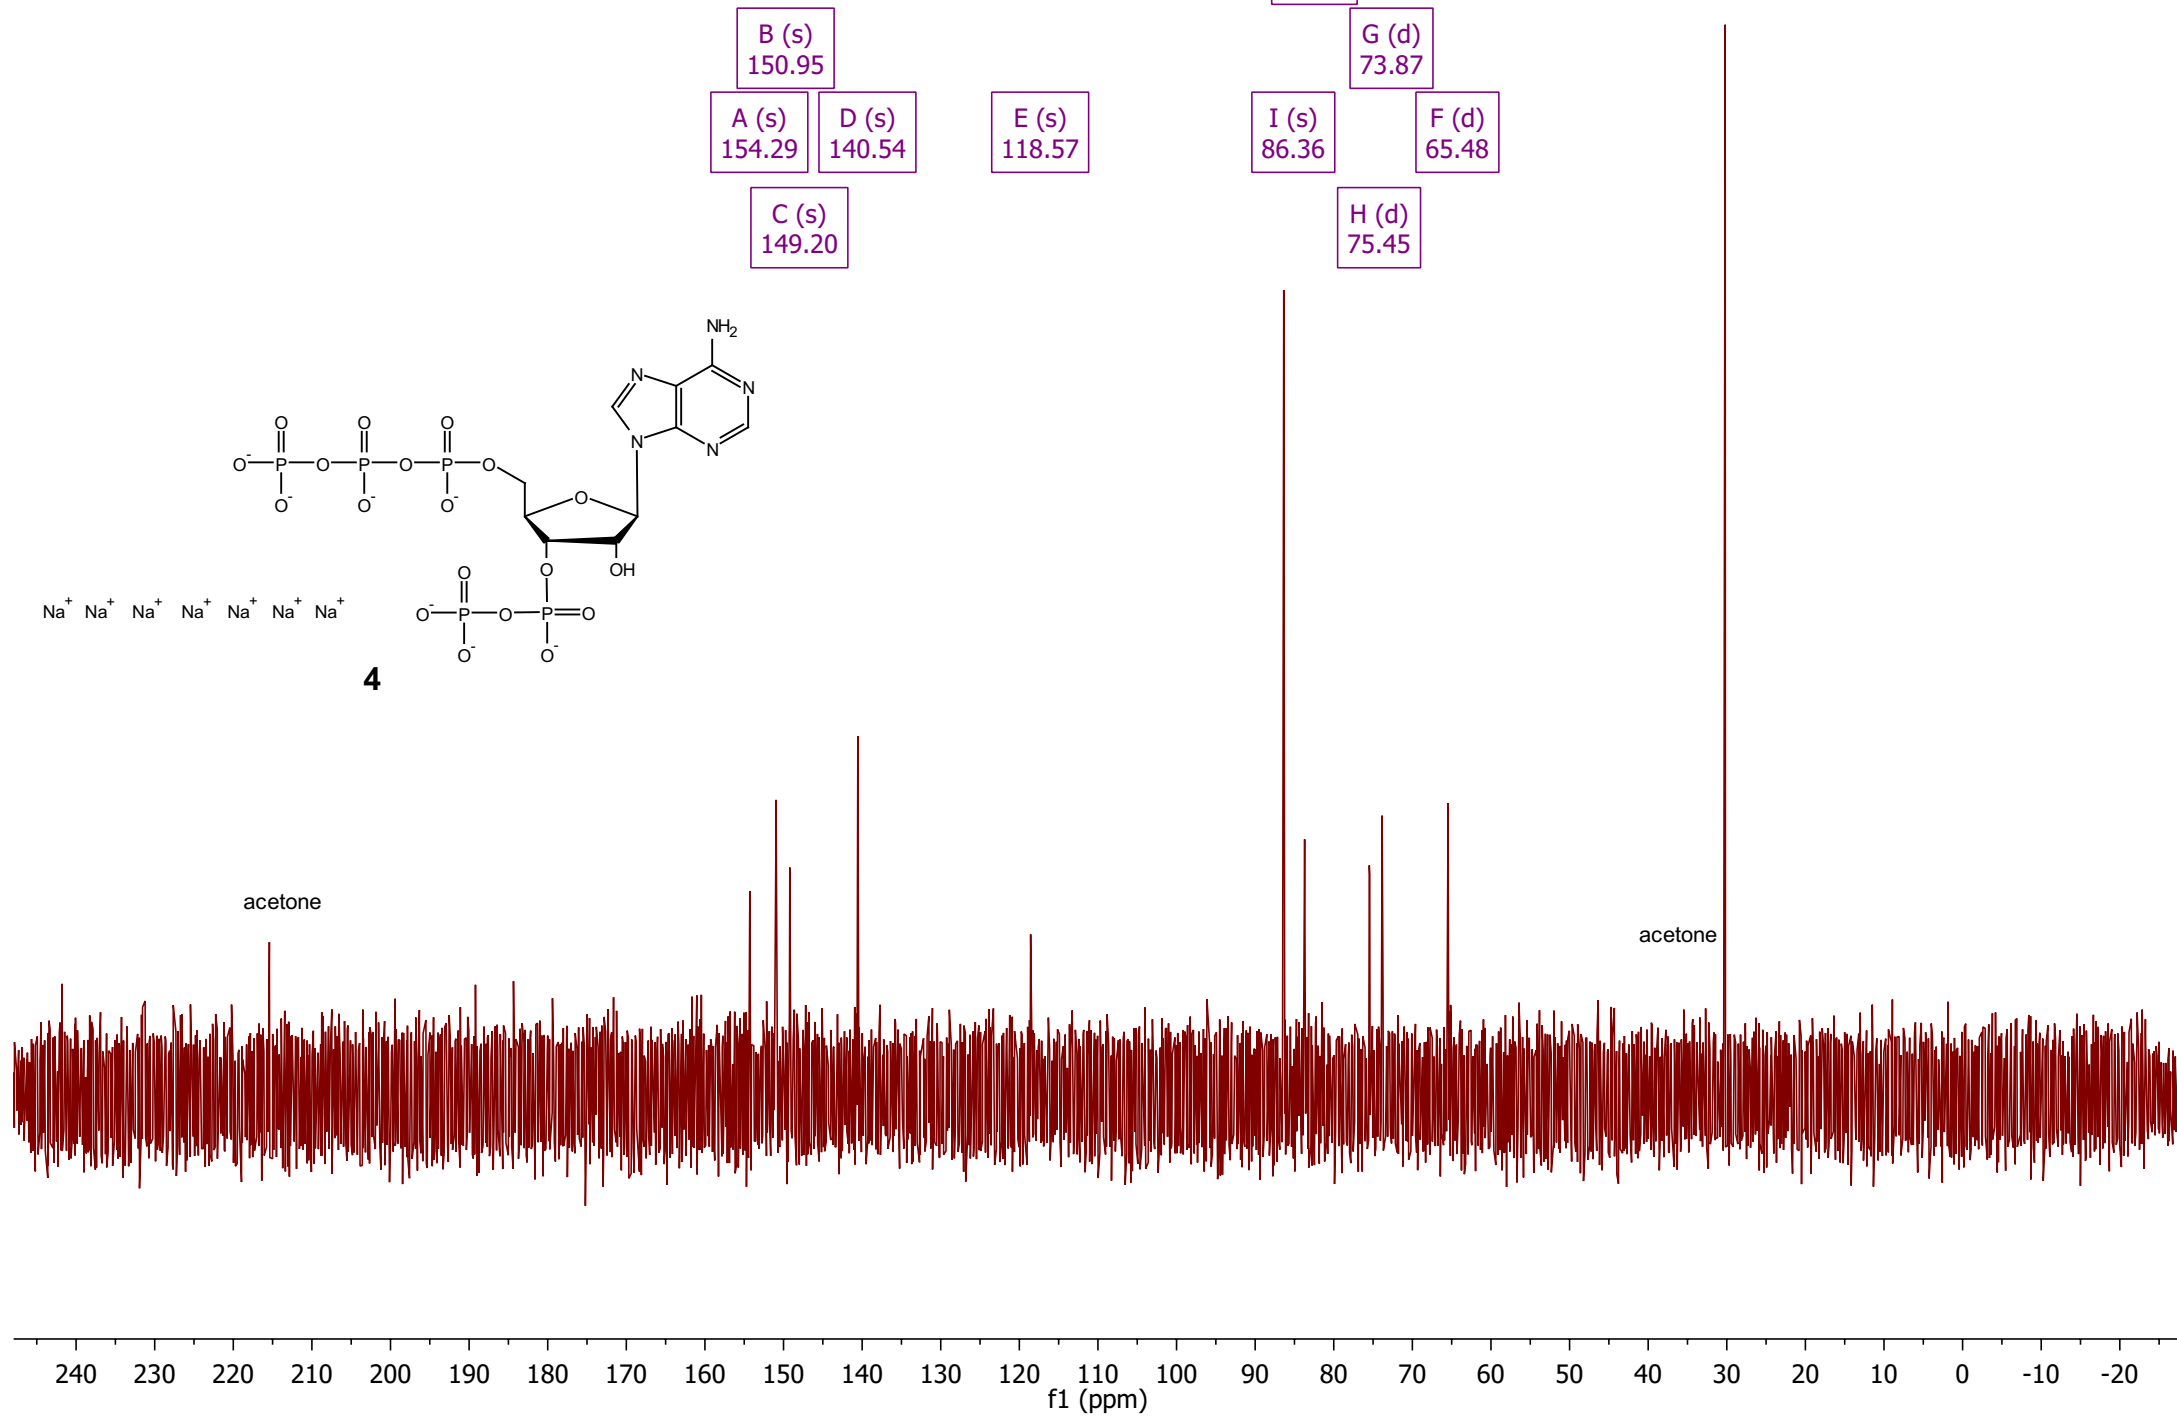

Compound 3 (pppGpp),  $^1\text{H}$  - NMR ( $\text{D}_2\text{O}$ , 400 MHz)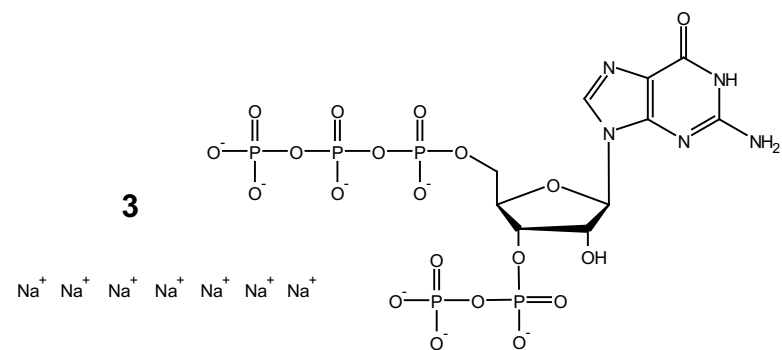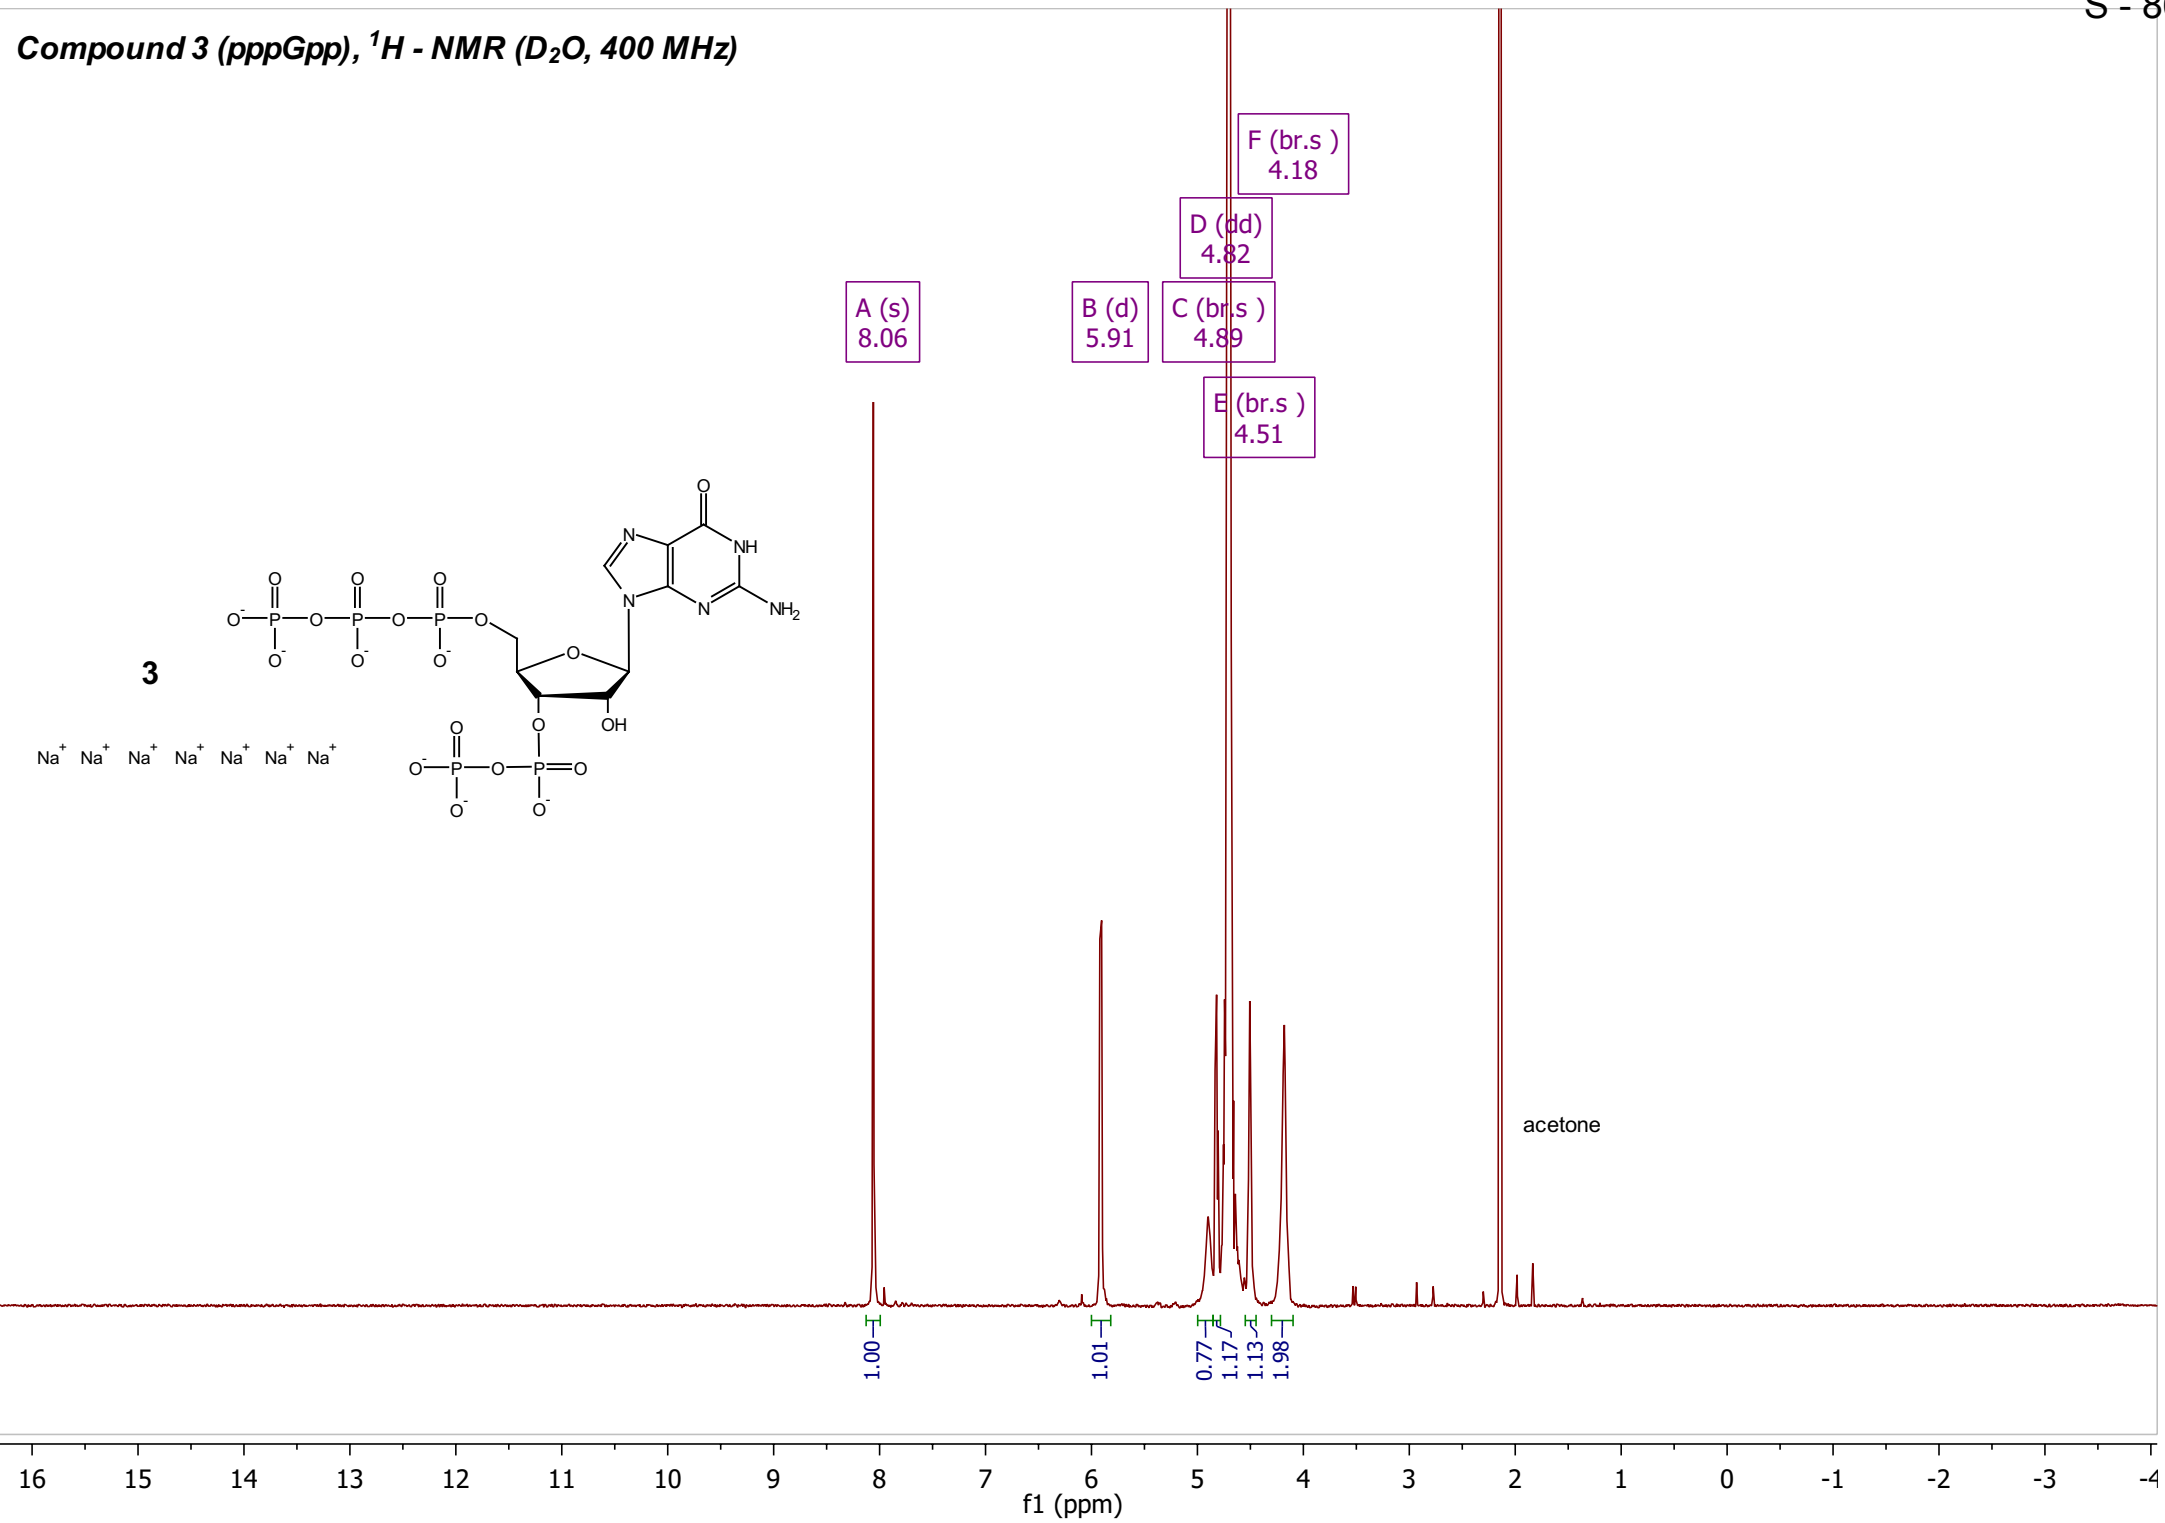

Compound 3 (pppGpp),  $^1\text{H}$   $\{^{31}\text{P}\}$  - NMR ( $\text{D}_2\text{O}$ , 400 MHz)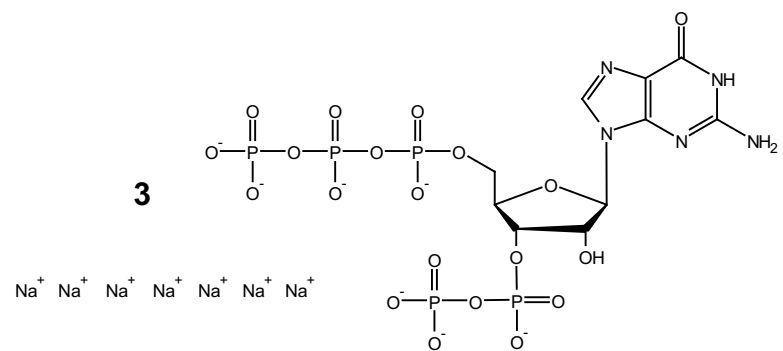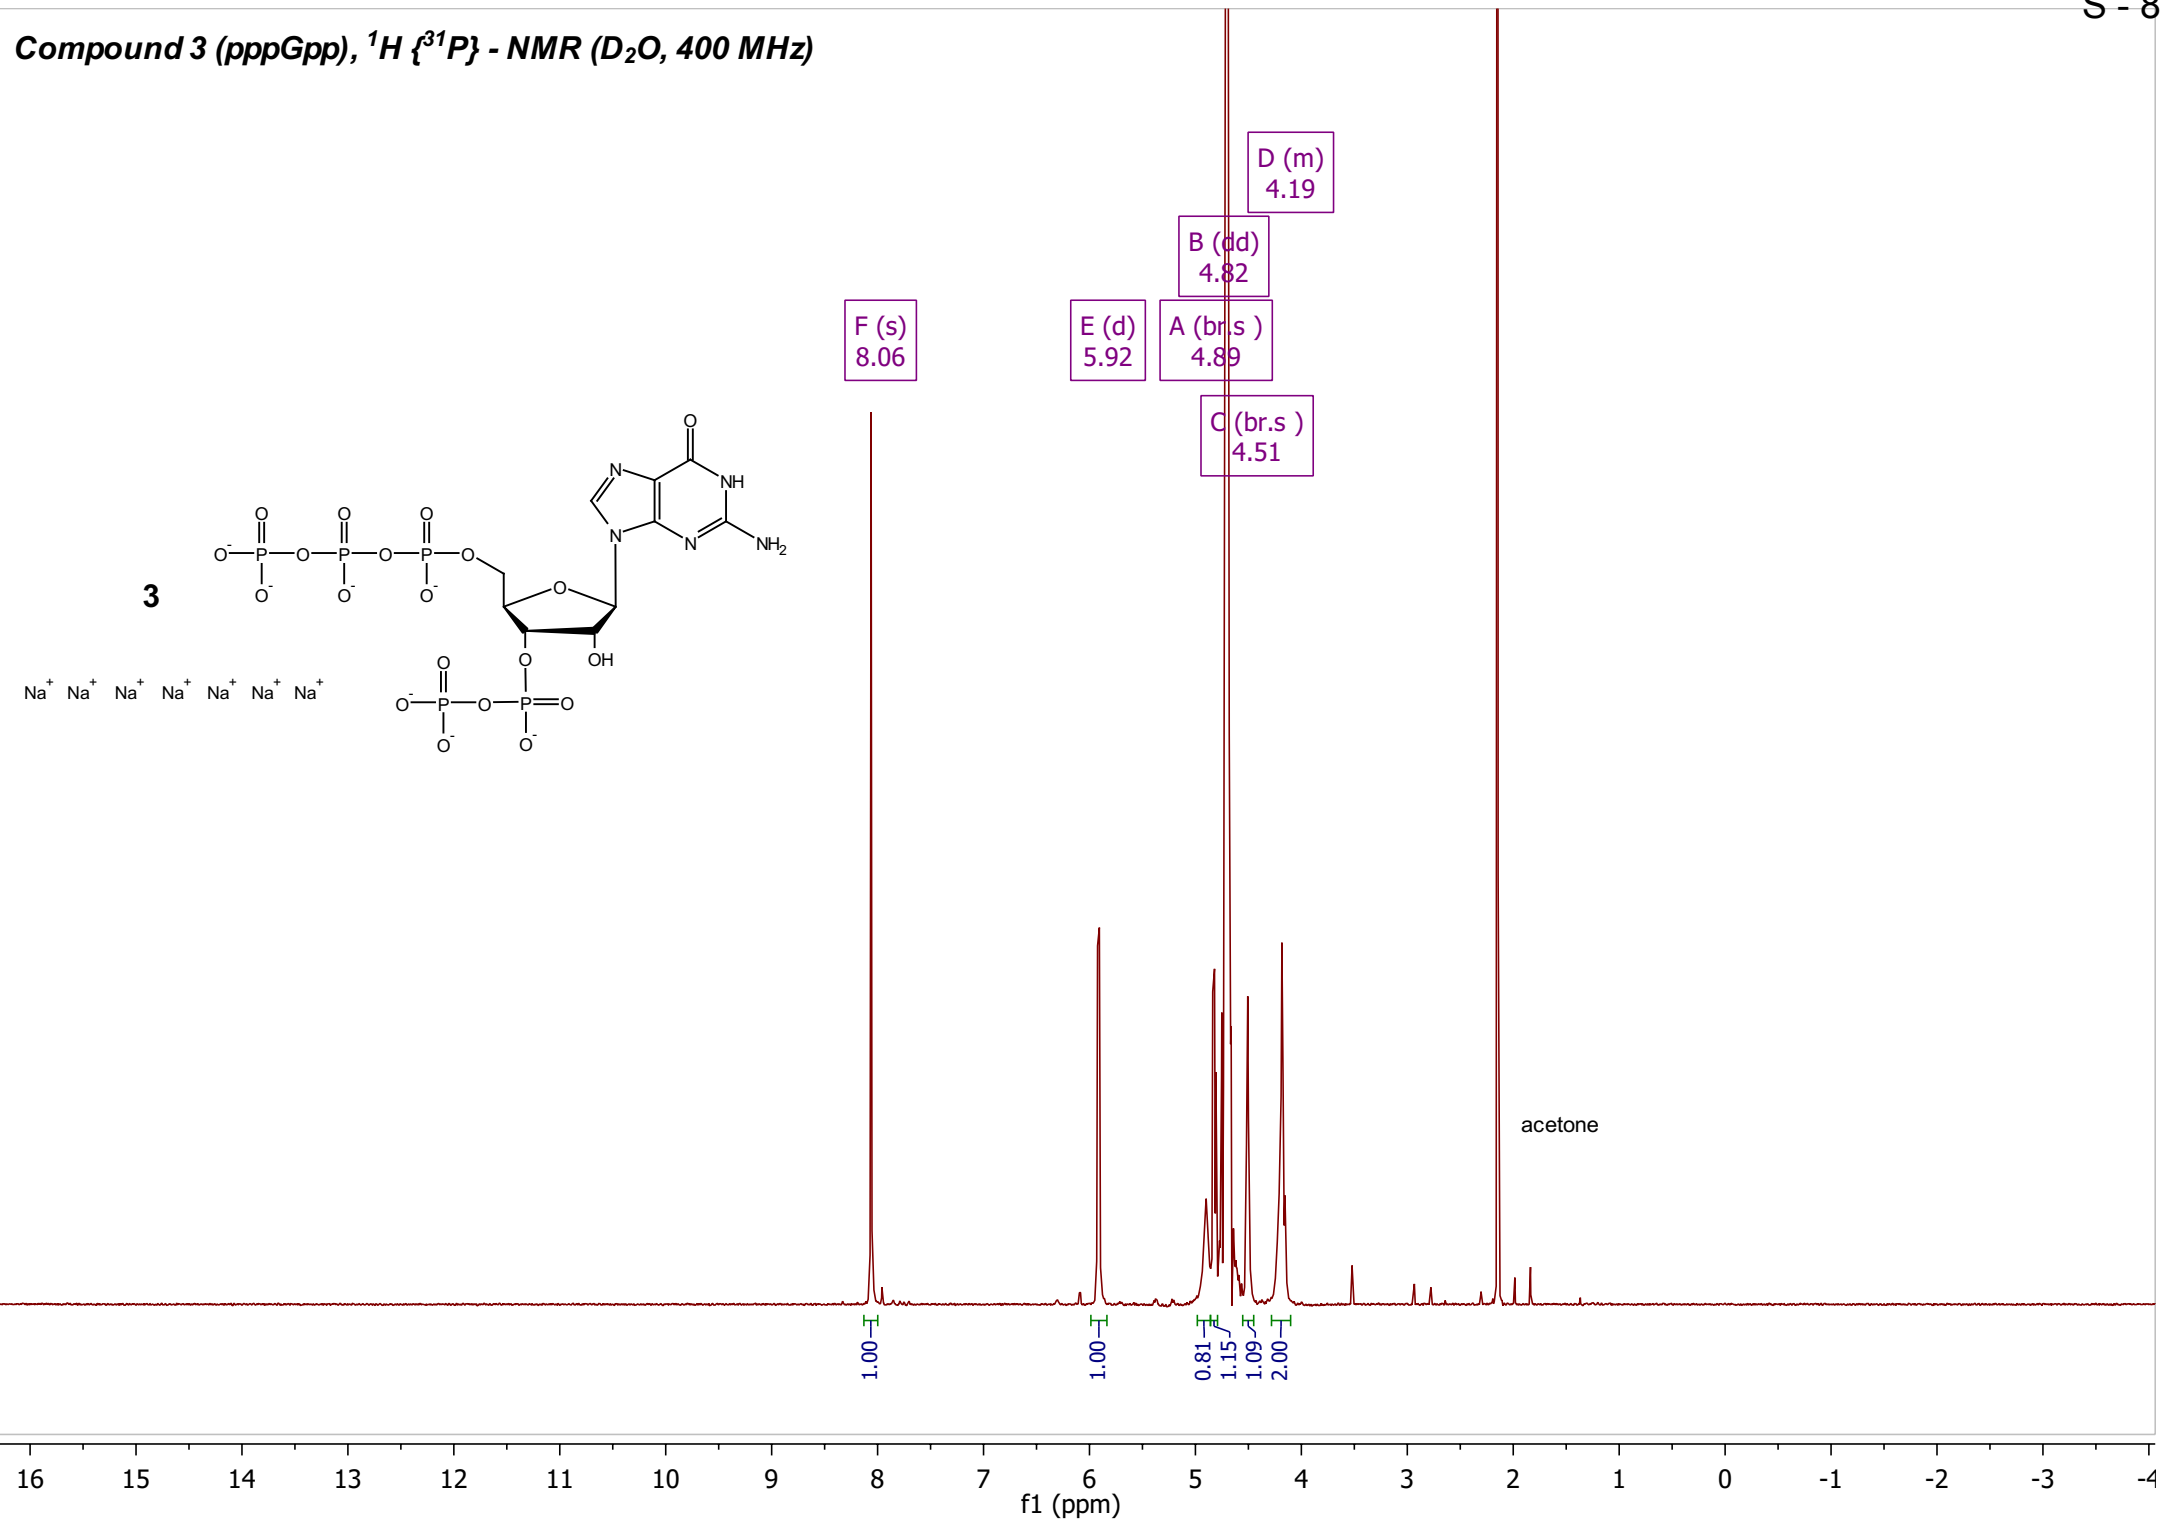



Compound 3 (pppGpp),  $^{31}\text{P}$   $\{^1\text{H}\}$  - NMR ( $\text{D}_2\text{O}$ , 162 MHz)

3

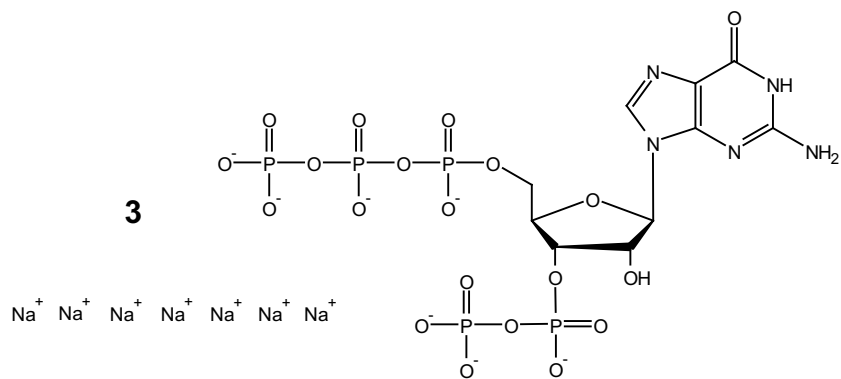

D (dd)  
-22.60

B (d)  
-9.92

A (d)  
-8.64

C (m)  
-11.28

B (d)  
-9.92

A (d)  
-8.64

C (m)  
-11.28

D (dd)  
-22.60

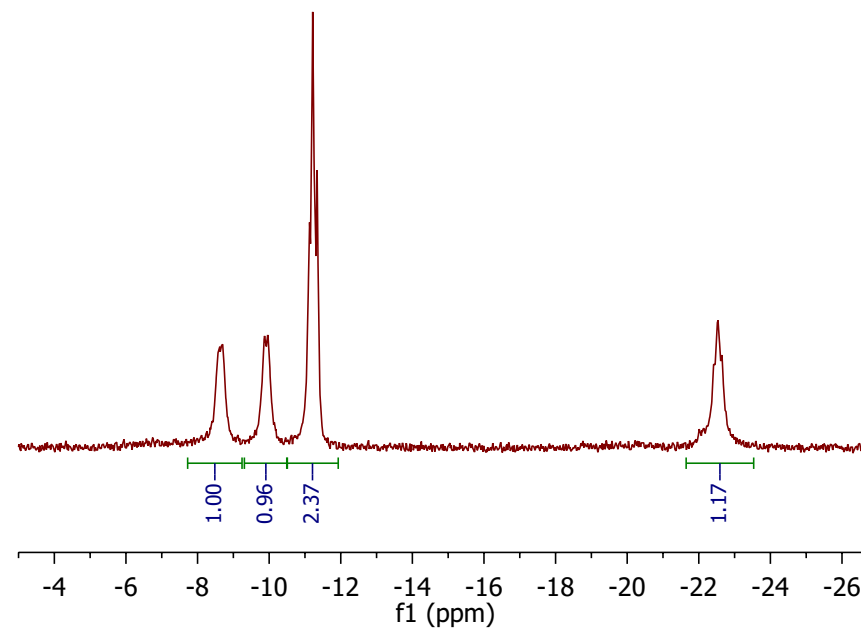

1.00

0.96

2.37

1.17

200 180 160 140 120 100 80 60 40 20 0 20 40 60 80 100 120 140 160 180 200

f1 (ppm)

Compound 22 ( $^{18}\text{O}$ -pppApp),  $^1\text{H}$  - NMR ( $\text{D}_2\text{O}$ , 400 MHz)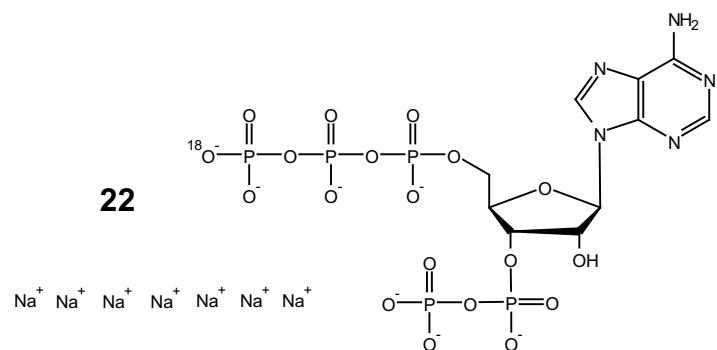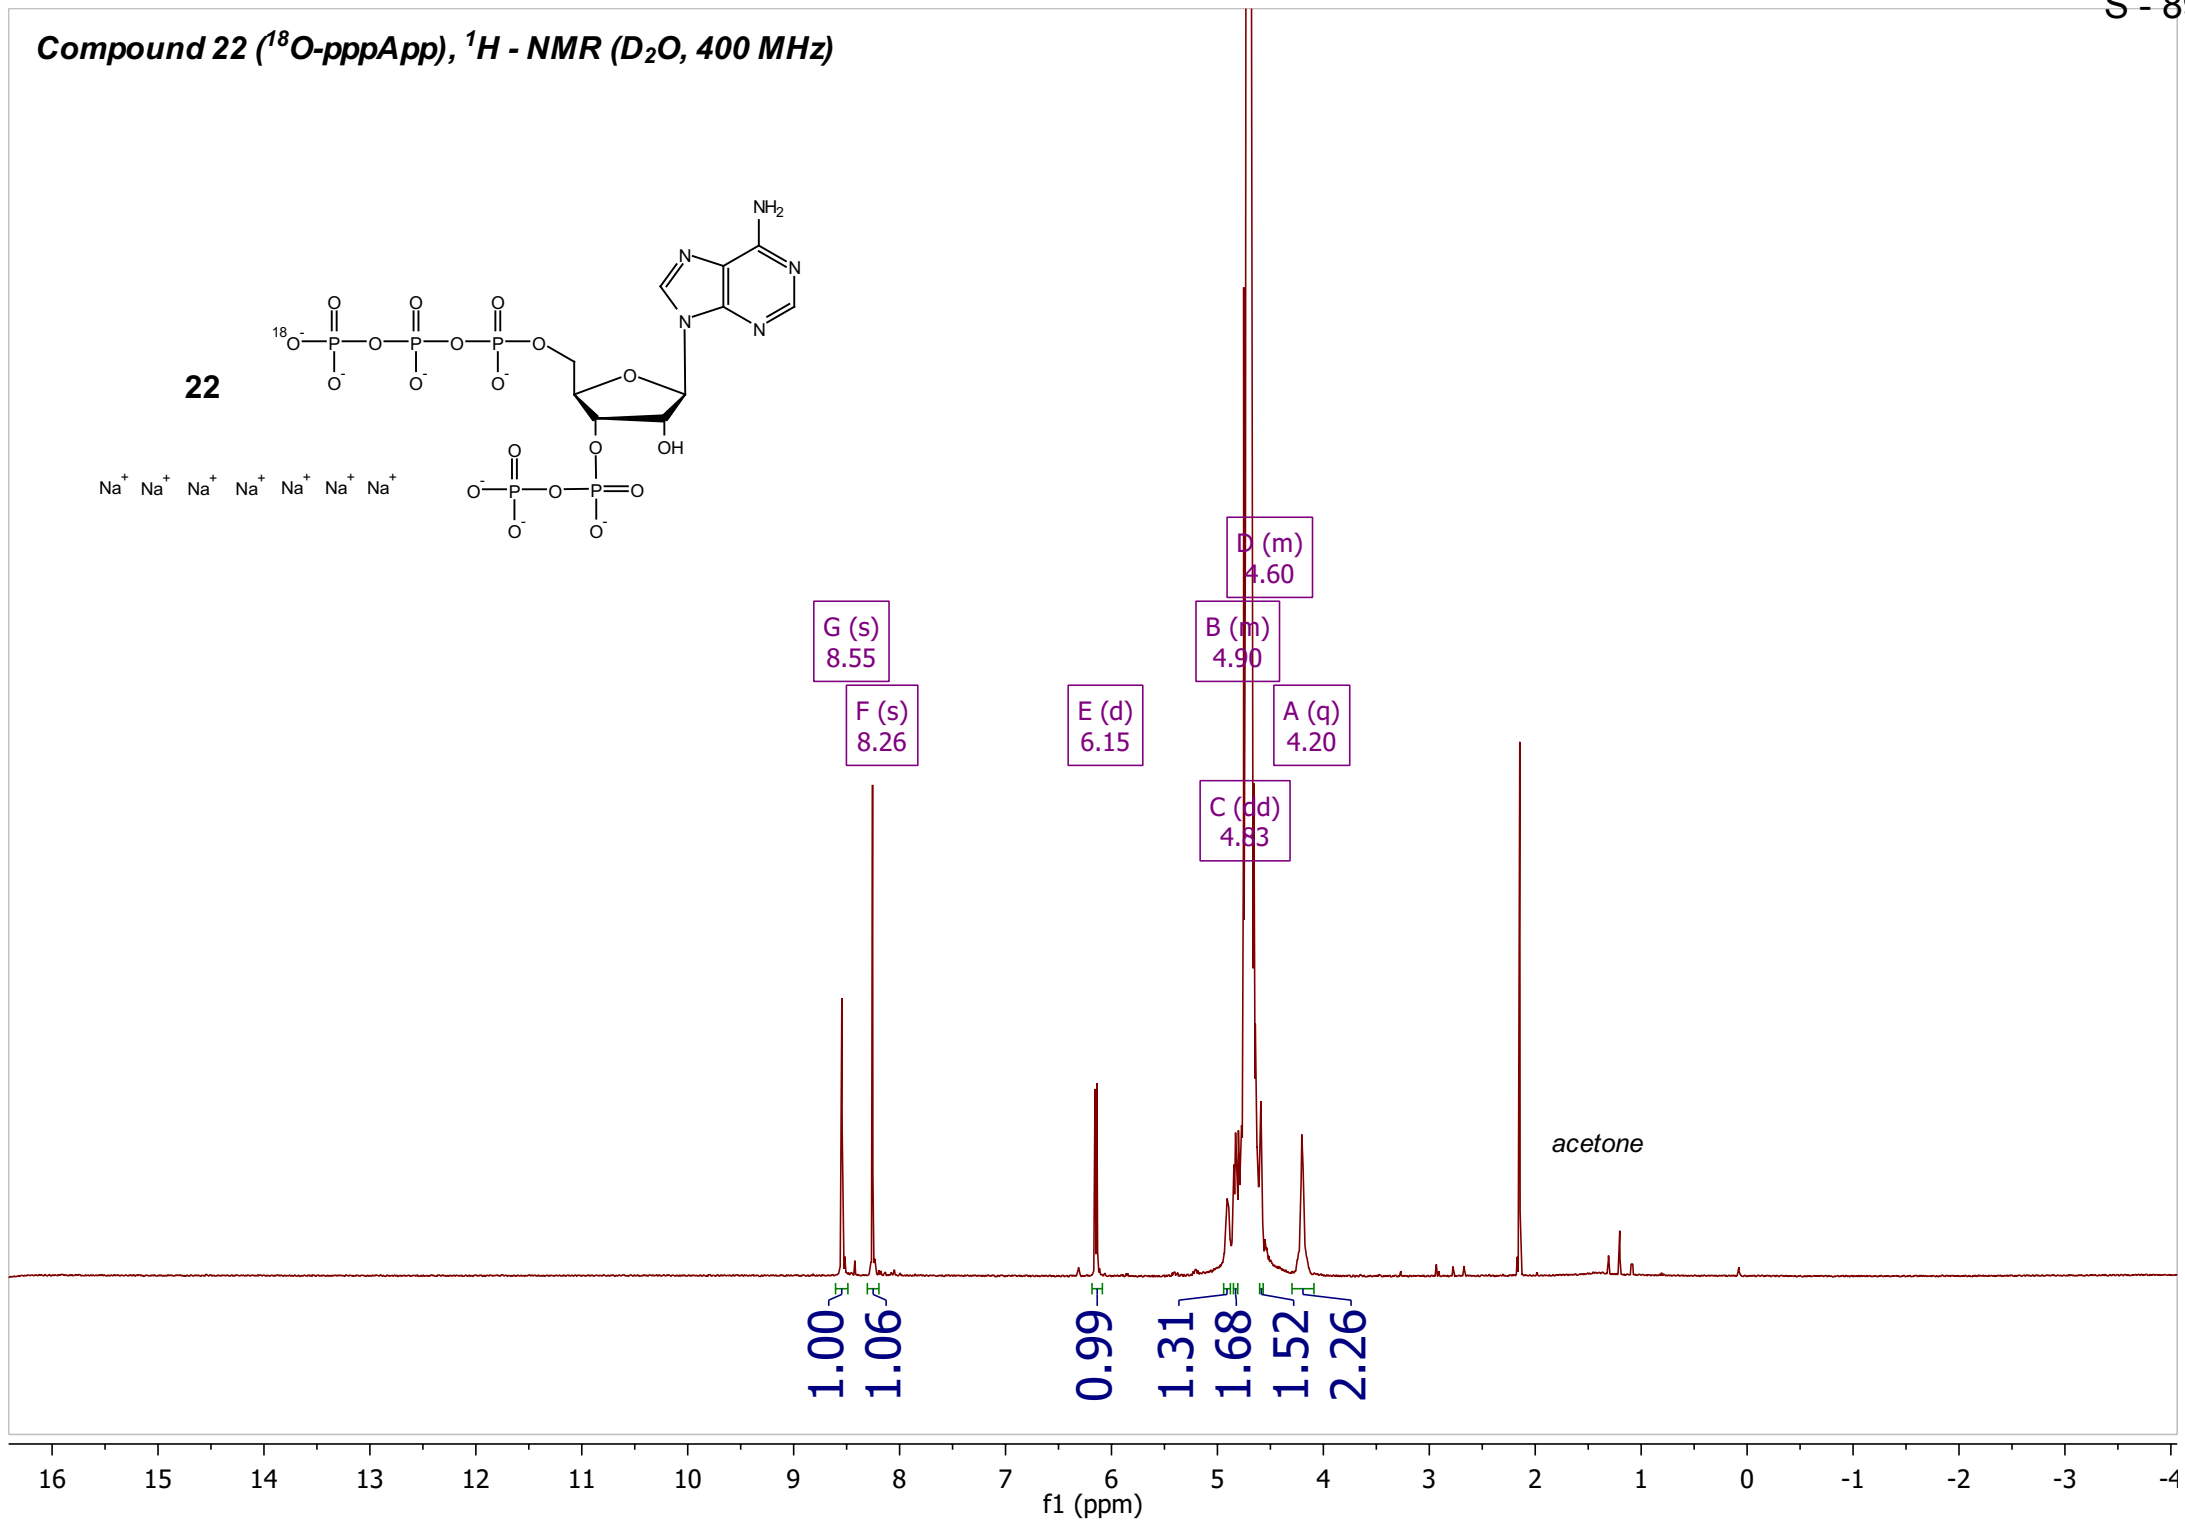

Compound 22 ( $^{18}\text{O}$ -pppApp),  $^{31}\text{P}$  { $^1\text{H}$ } - NMR ( $\text{D}_2\text{O}$ , 162 MHz)

22

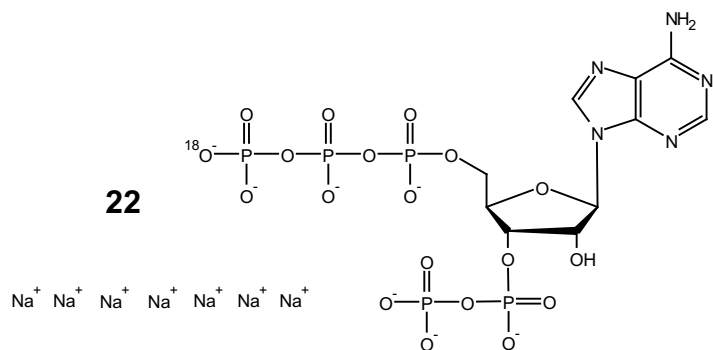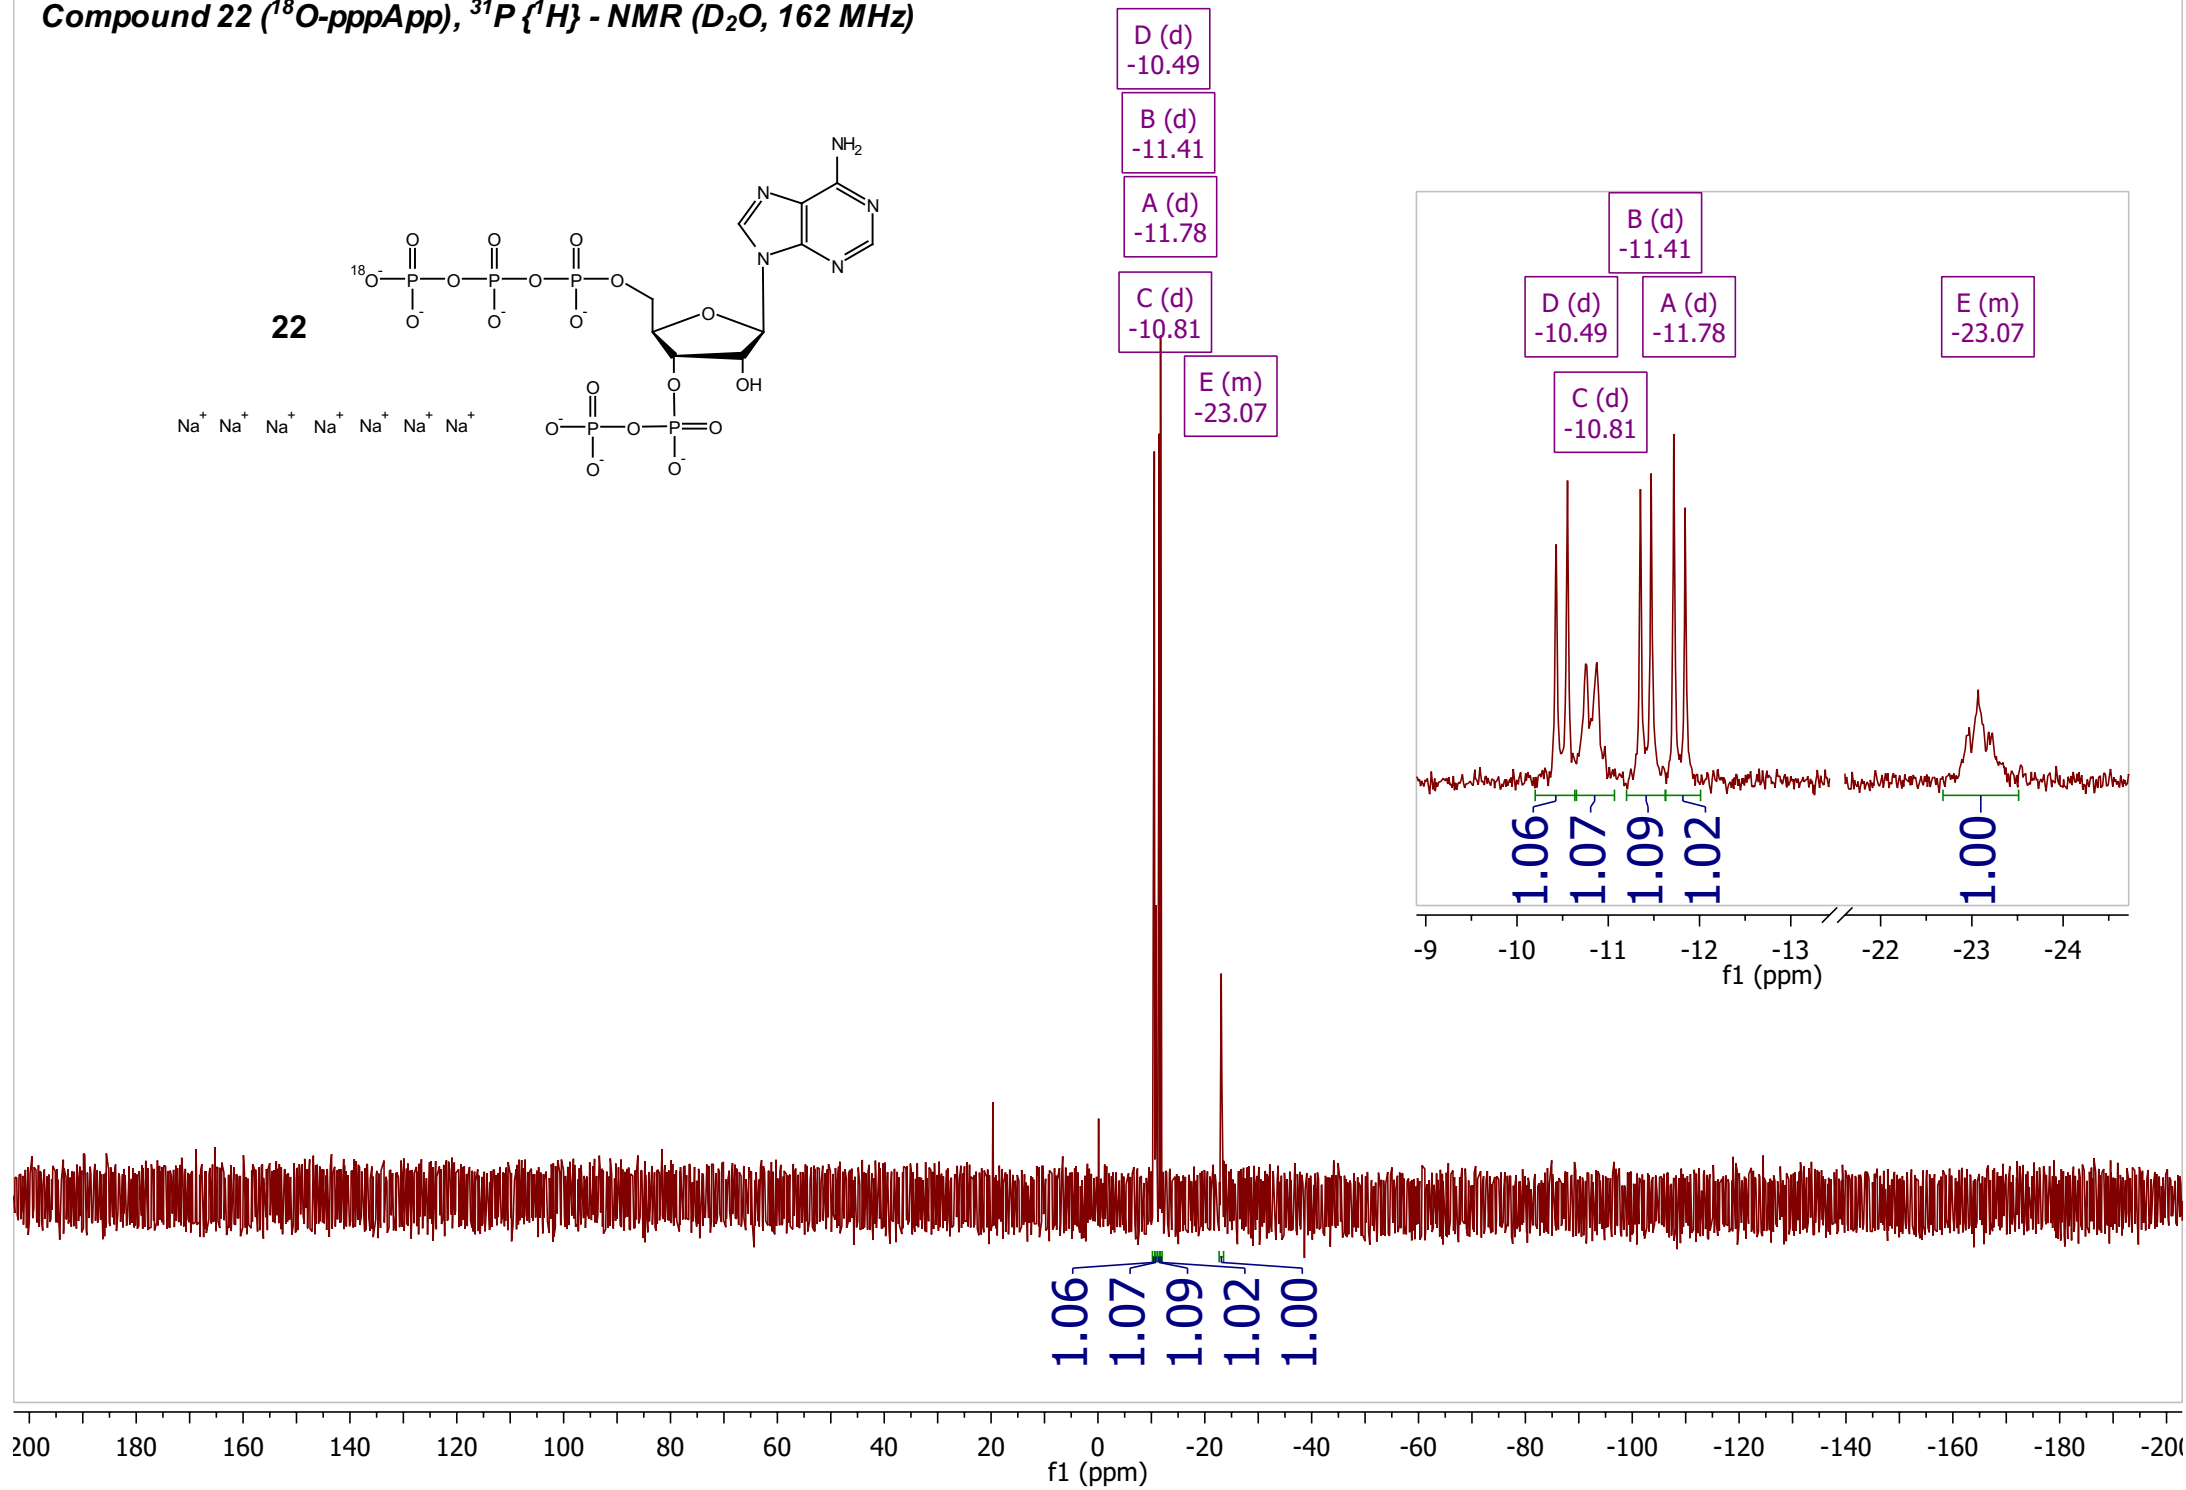

**Compound 23 (biotin - pppApp),  $^1\text{H}$  - NMR ( $\text{D}_2\text{O}$ , 400 MHz)**

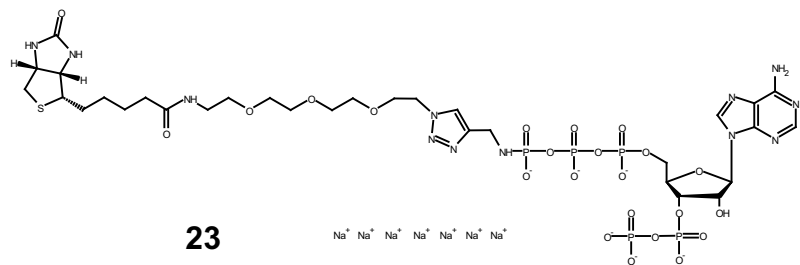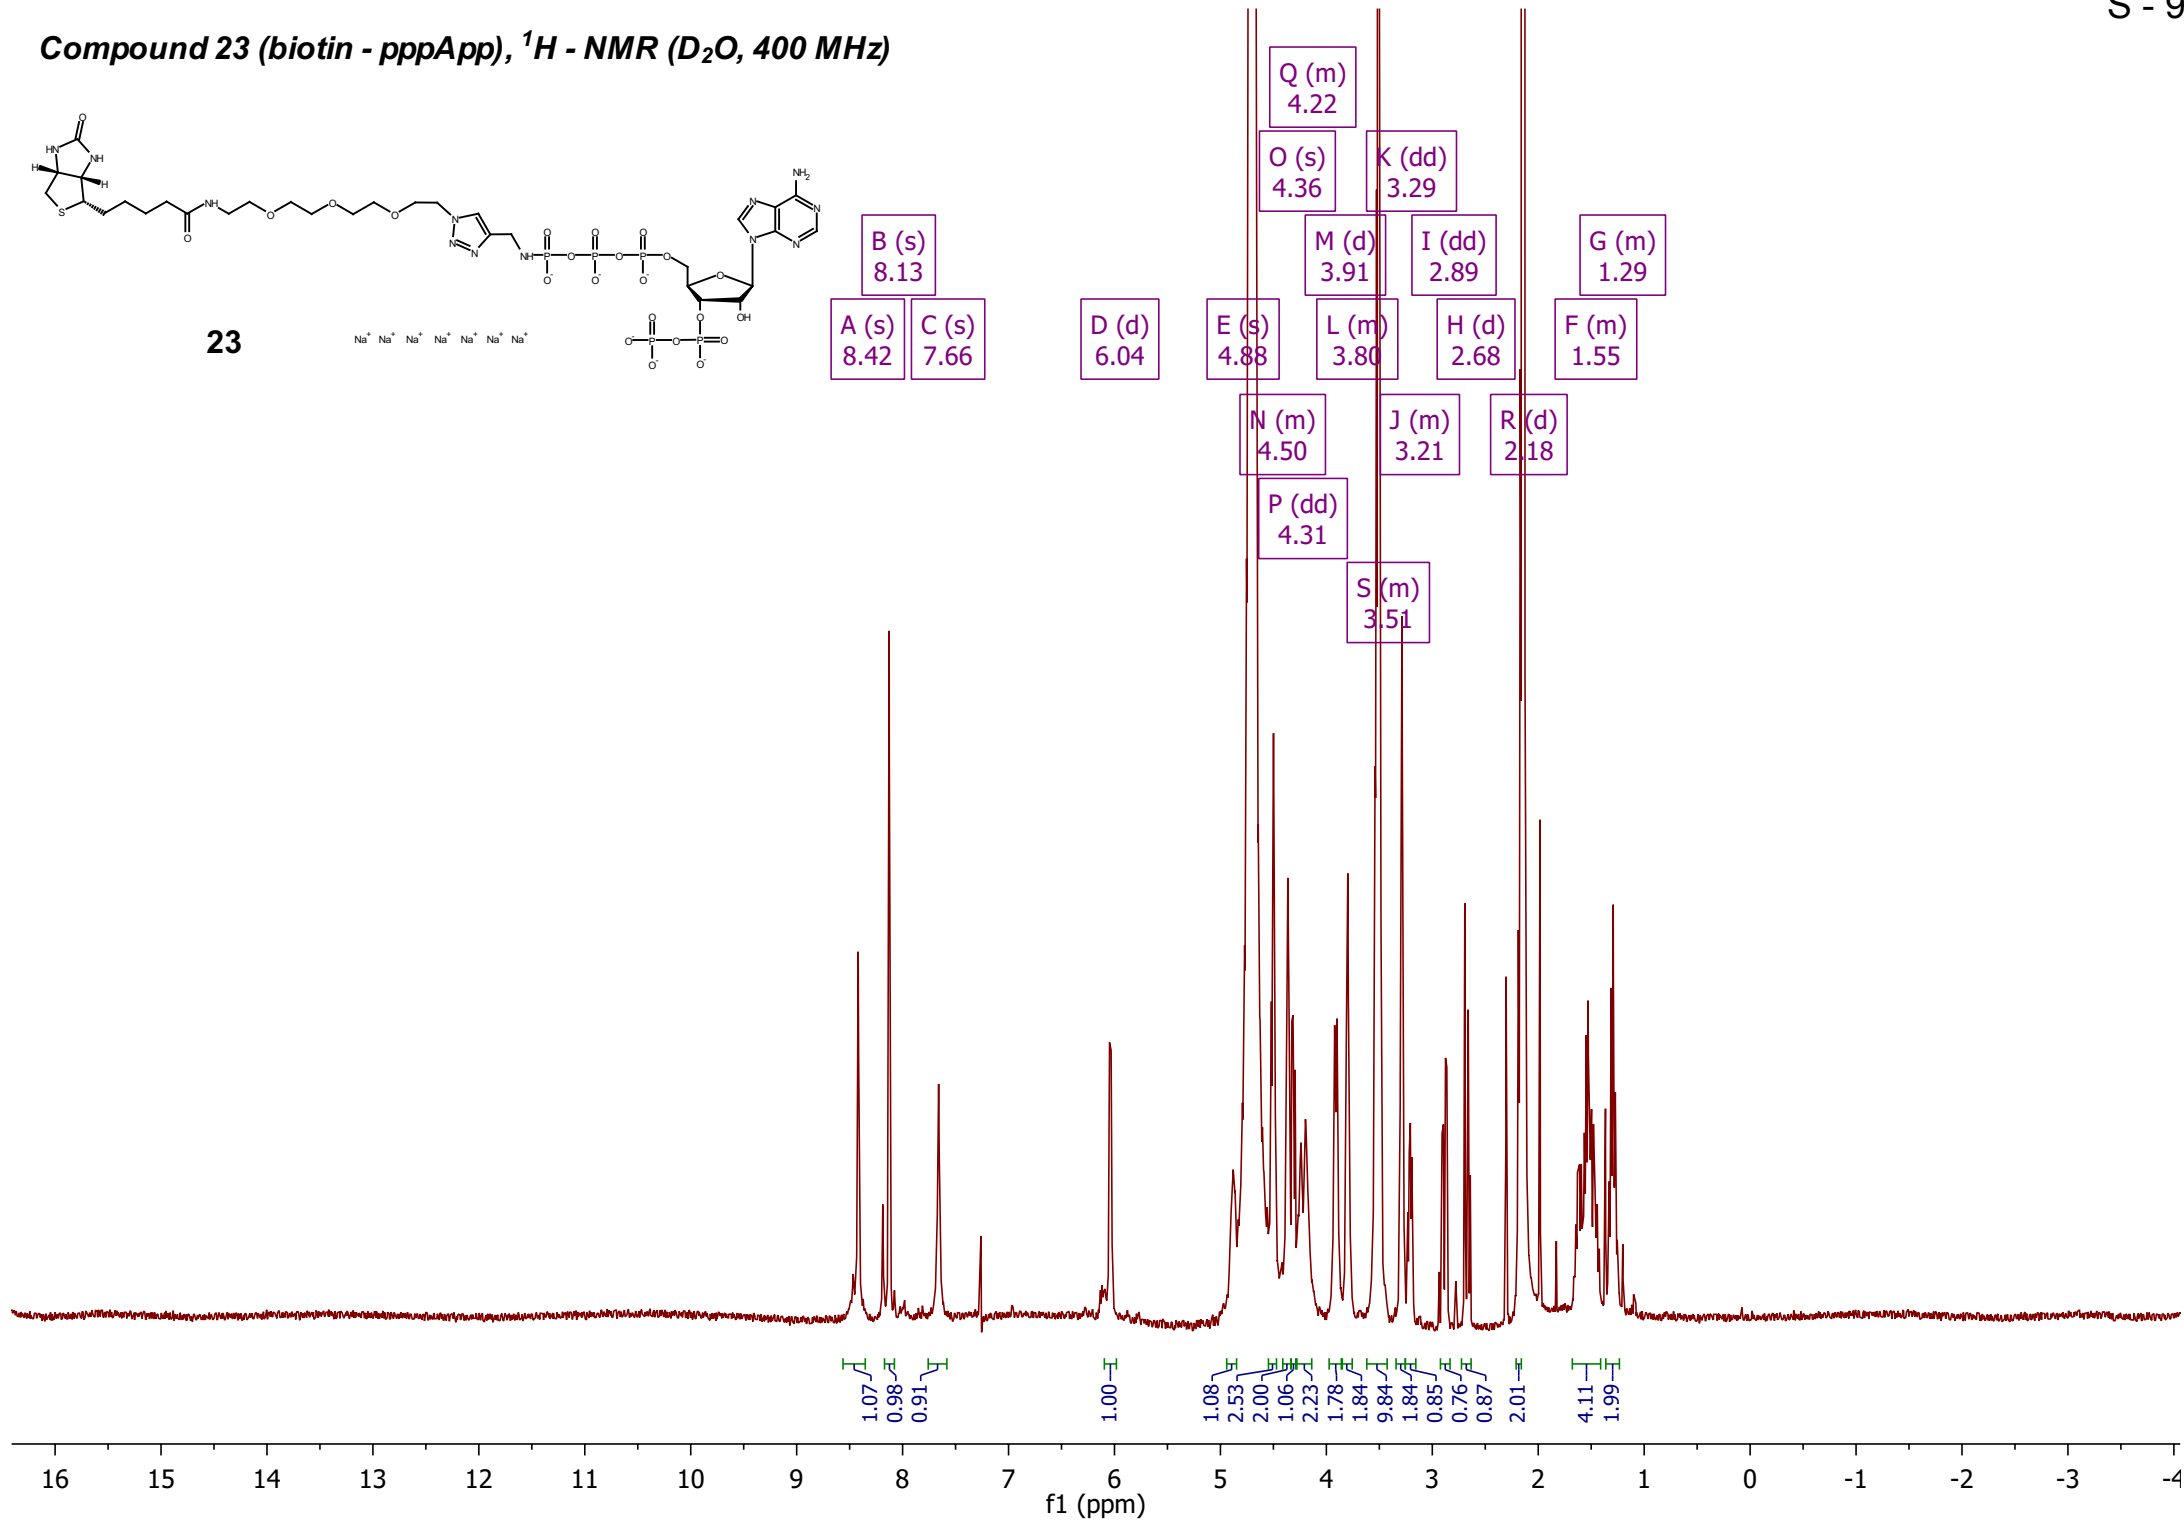

Compound 23 (biotin - pppApp),  $^{31}\text{P}$   $\{^1\text{H}\}$  - NMR ( $\text{D}_2\text{O}$ , 162 MHz)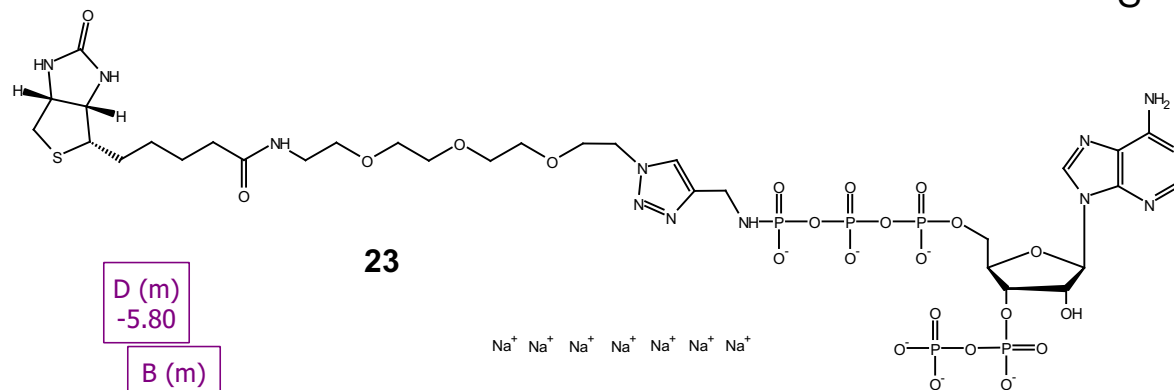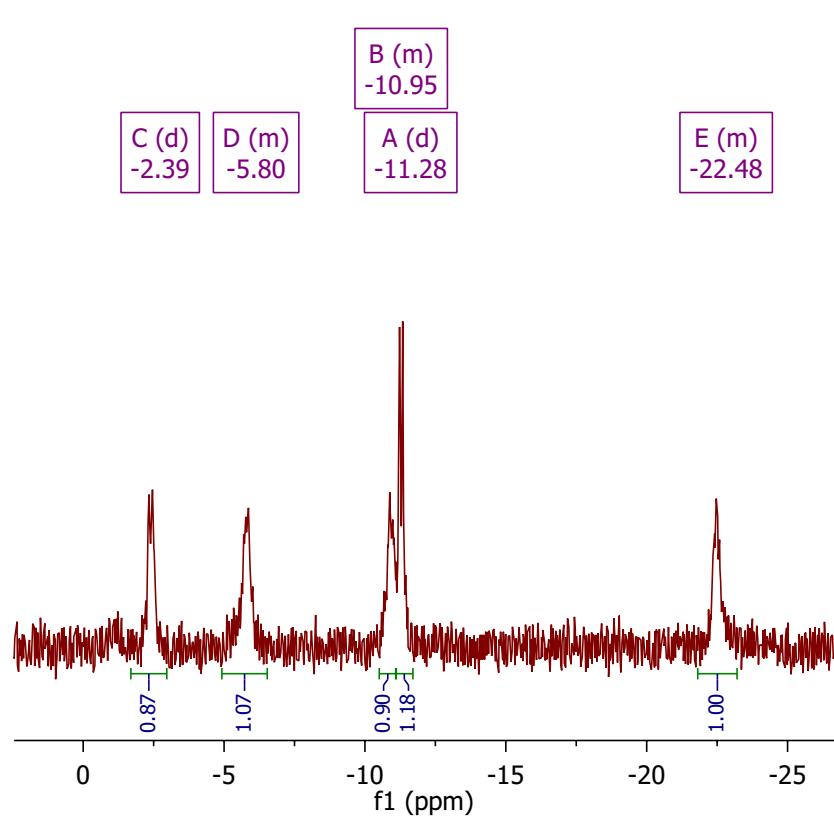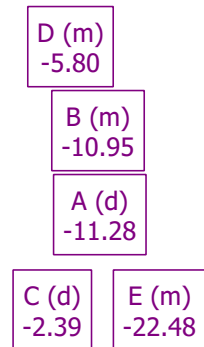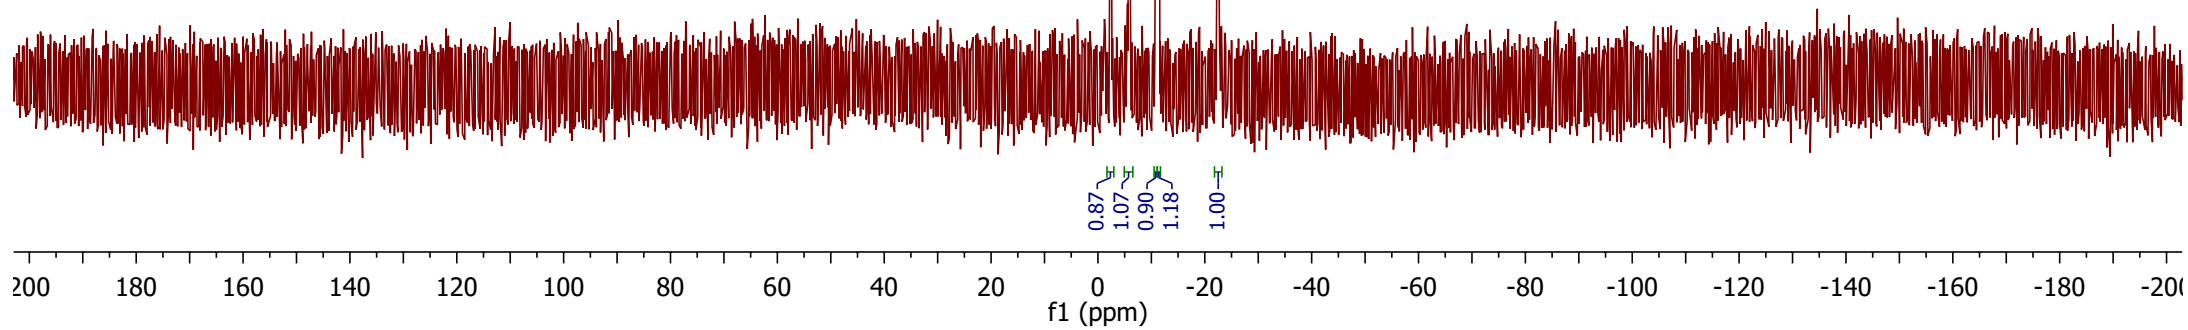

Compound 24 (fluorophor - pppApp),  $^1\text{H}$  - NMR ( $\text{D}_2\text{O}$ , 400 MHz)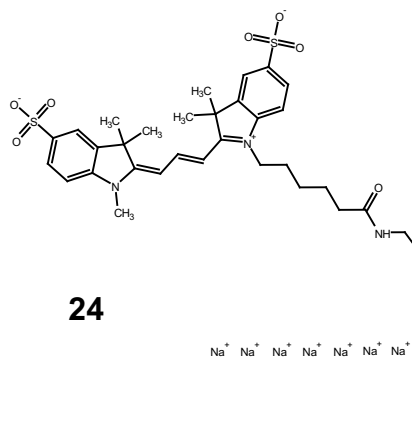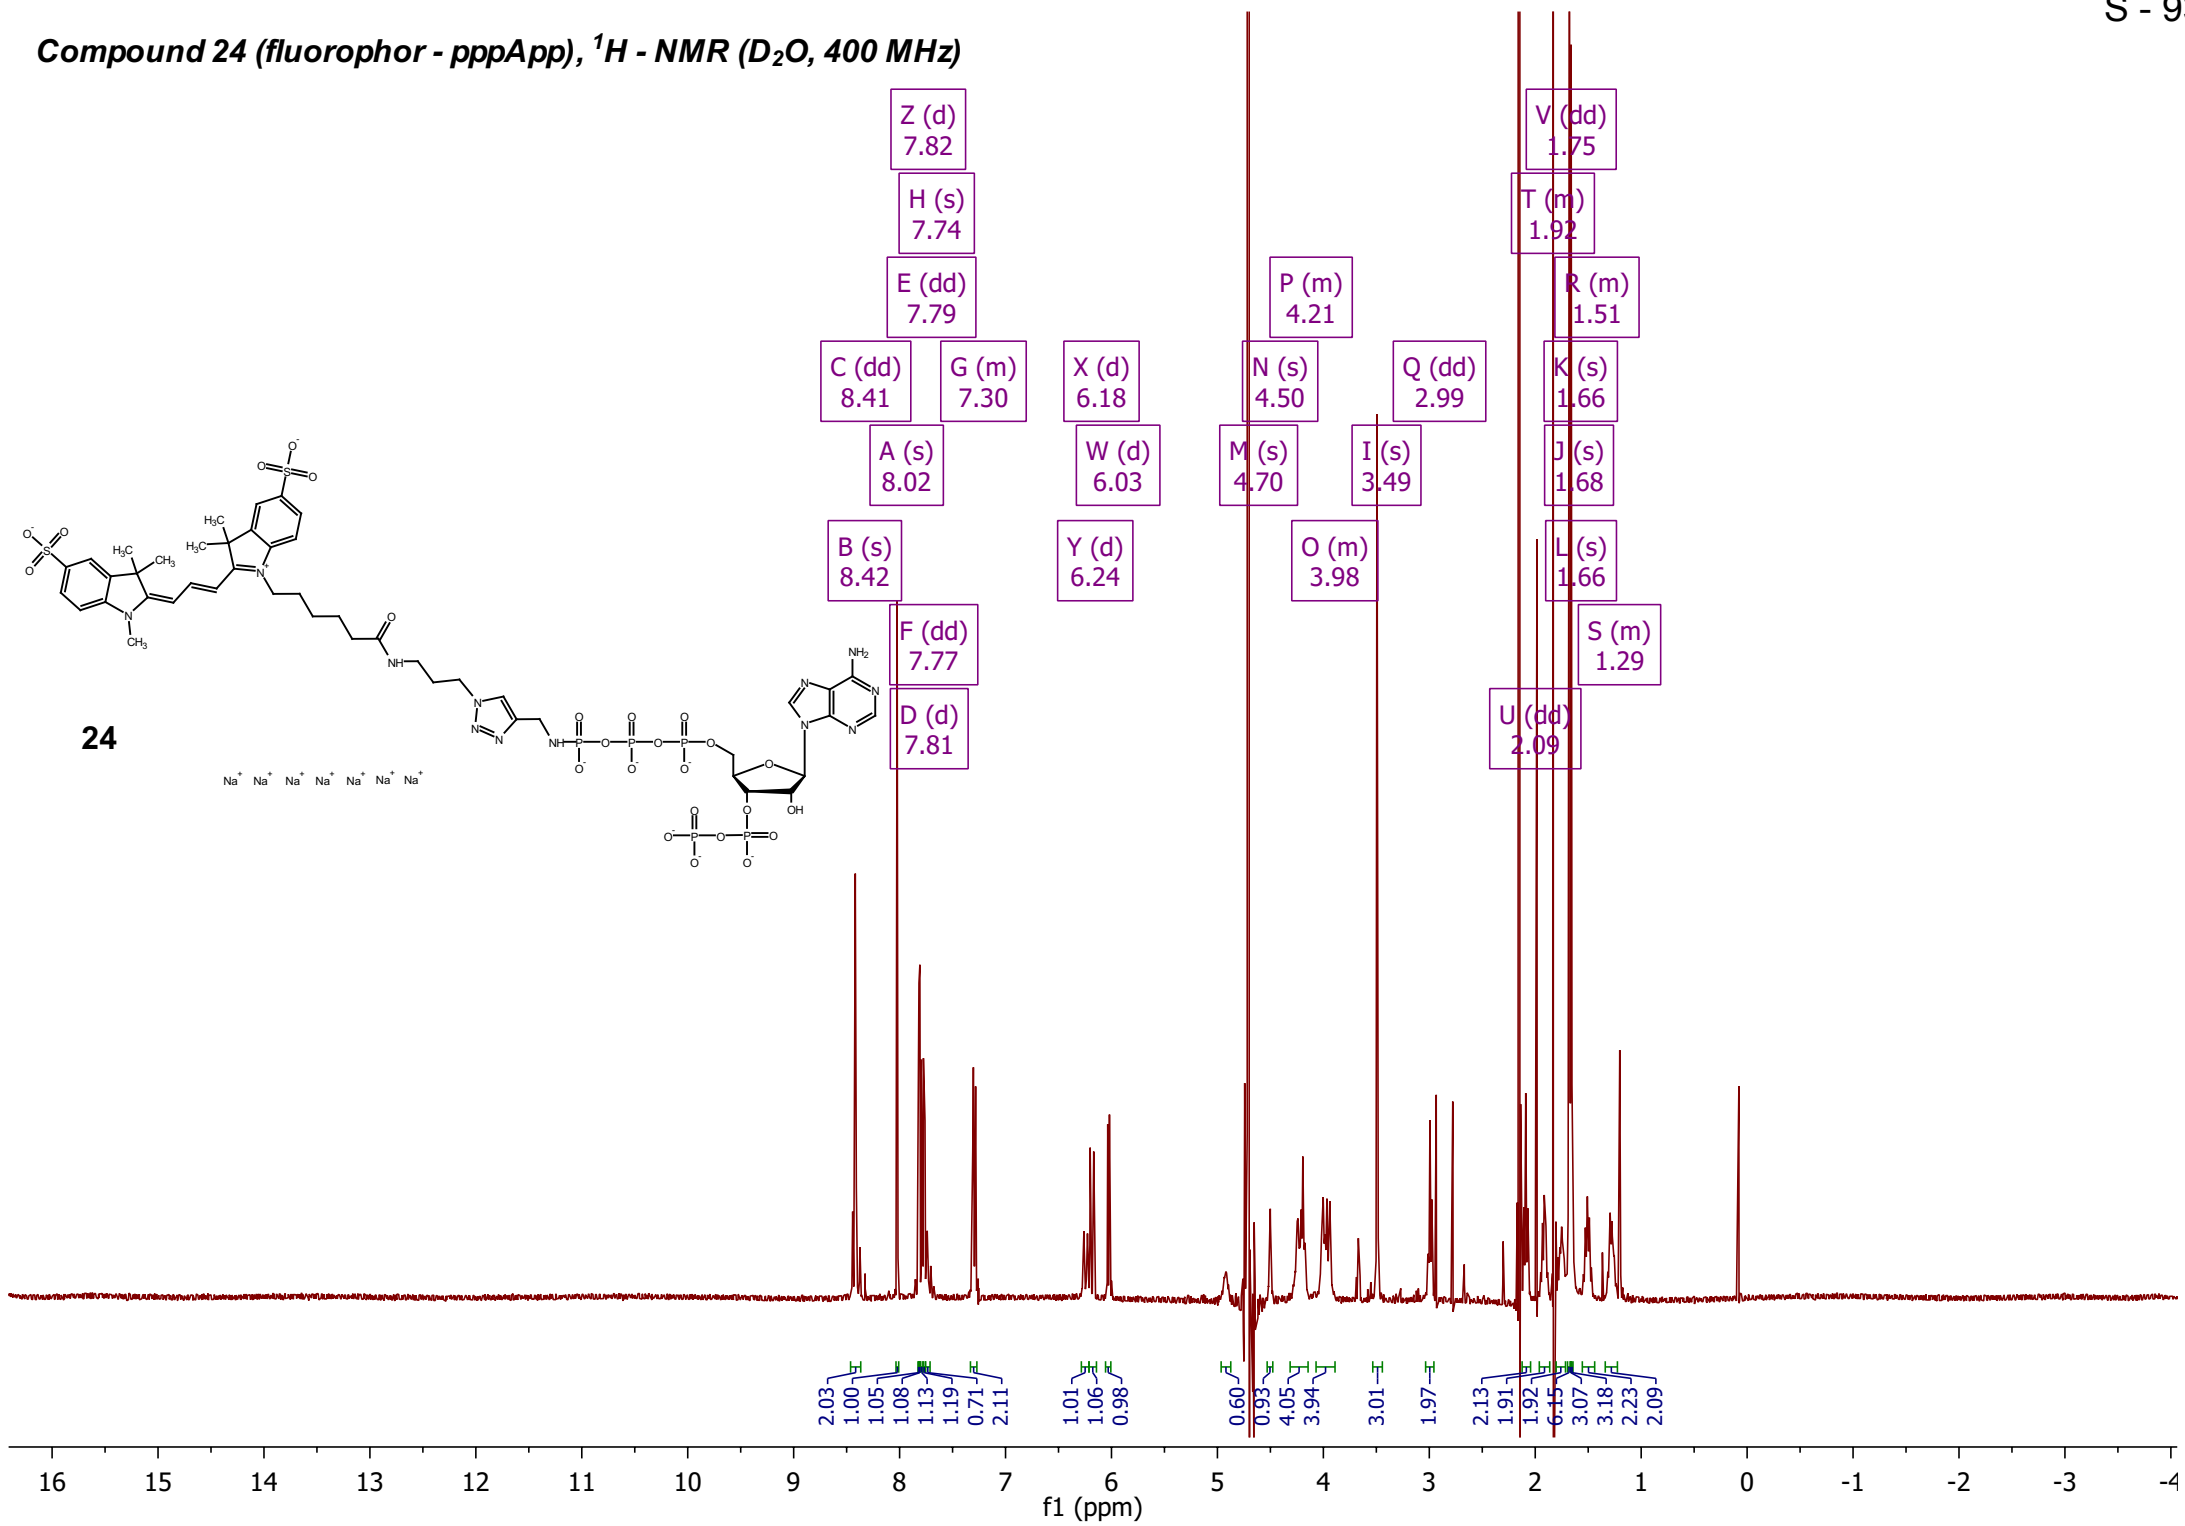

Compound 24 (fluorophor - pppApp),  $^{31}\text{P}$   $\{^1\text{H}\}$  - NMR ( $\text{D}_2\text{O}$ , 162 MHz)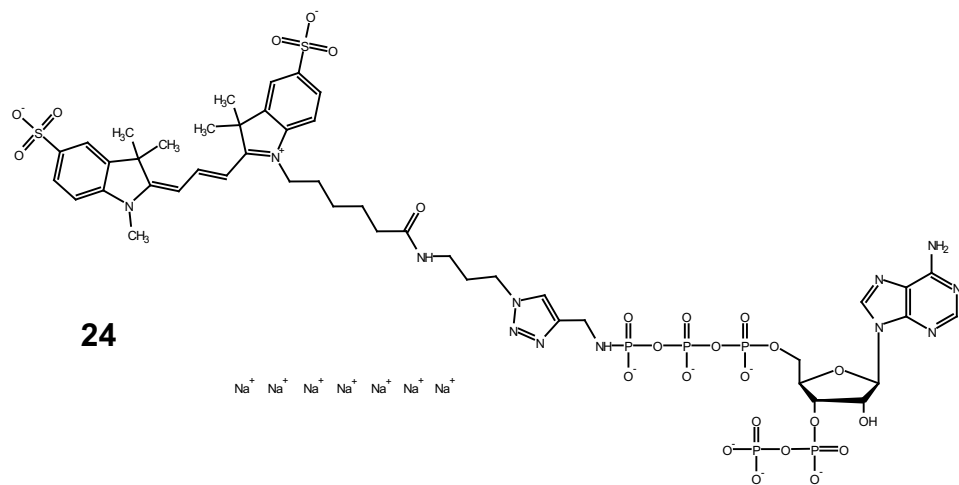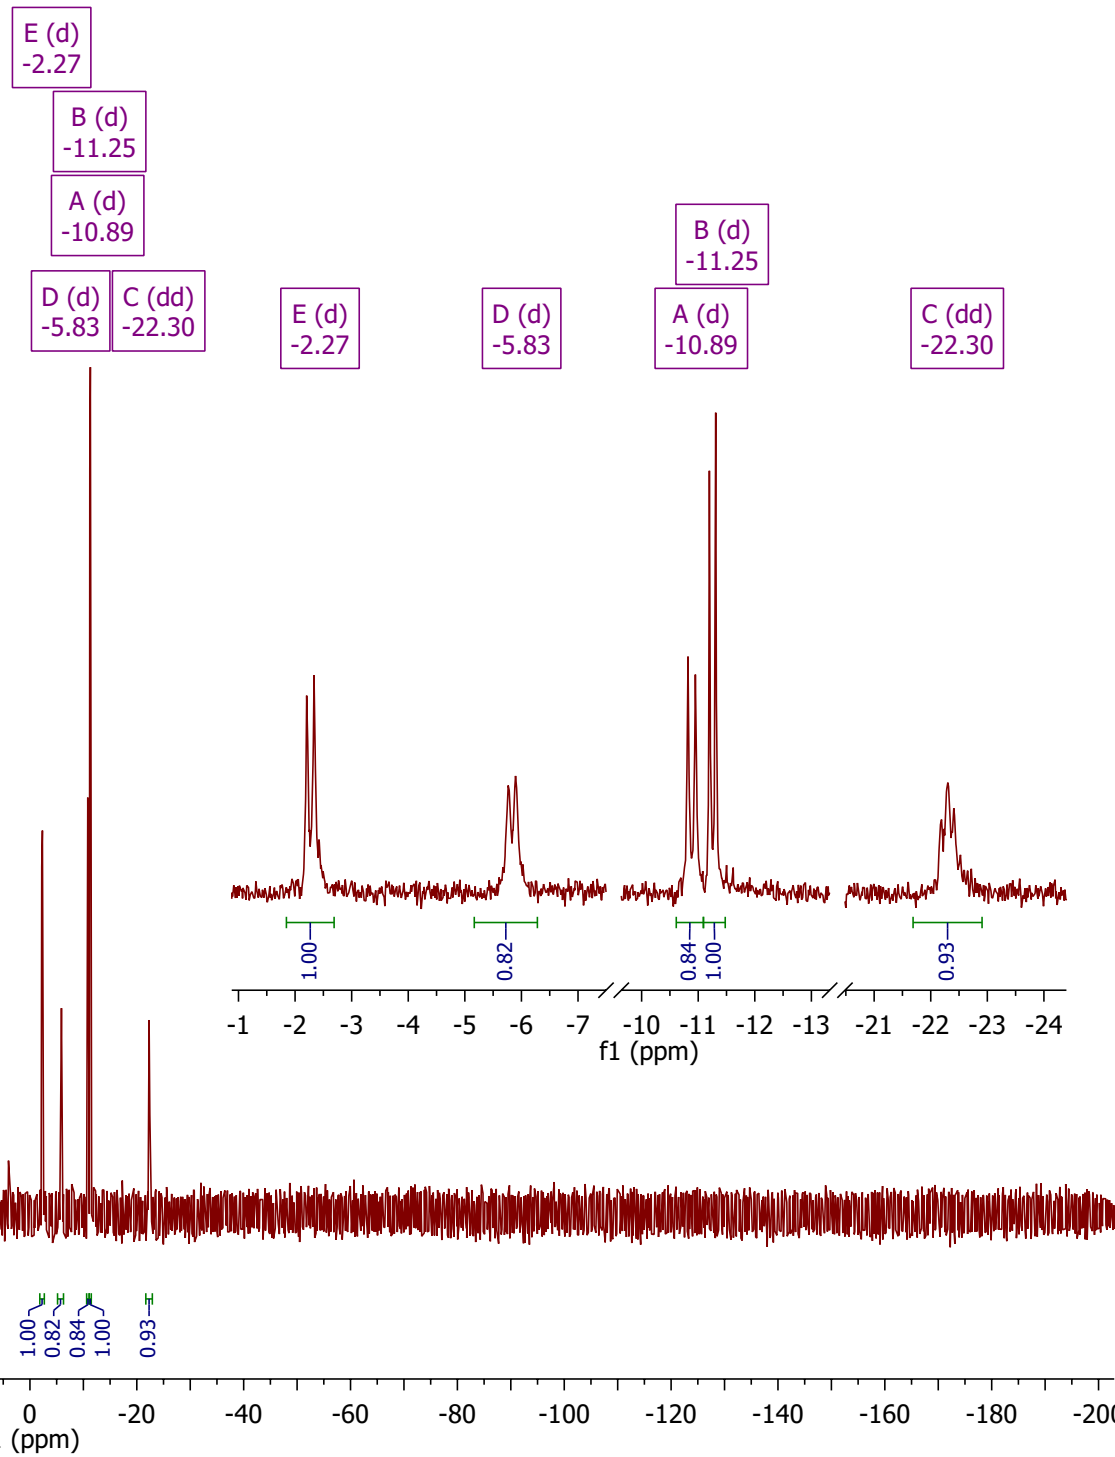

Exemplary P(III) - intermediate,  $^{31}\text{P}\{^1\text{H}\}$  - NMR (DMF- $d^7$ , 162 MHz)

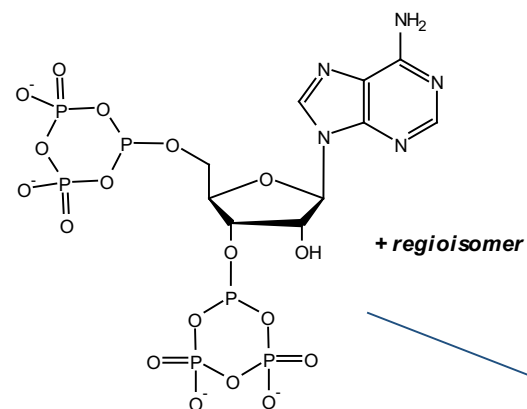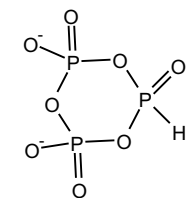

**H-Phosphonate**  
(hydrolysed P-Amidite)

**P(III) - signals**

pyrophosphat

**P(V) - signals**

0.75

2.00

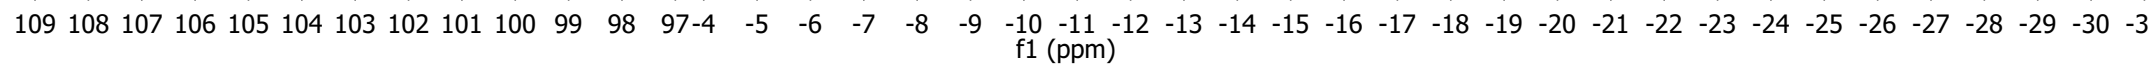



Exemplary 2',3'-cyclophosphate intermediate 10 and crude product 11,  $^{31}\text{P}\{^1\text{H}\}$  - NMR ( $\text{D}_2\text{O}$ , 162 MHz)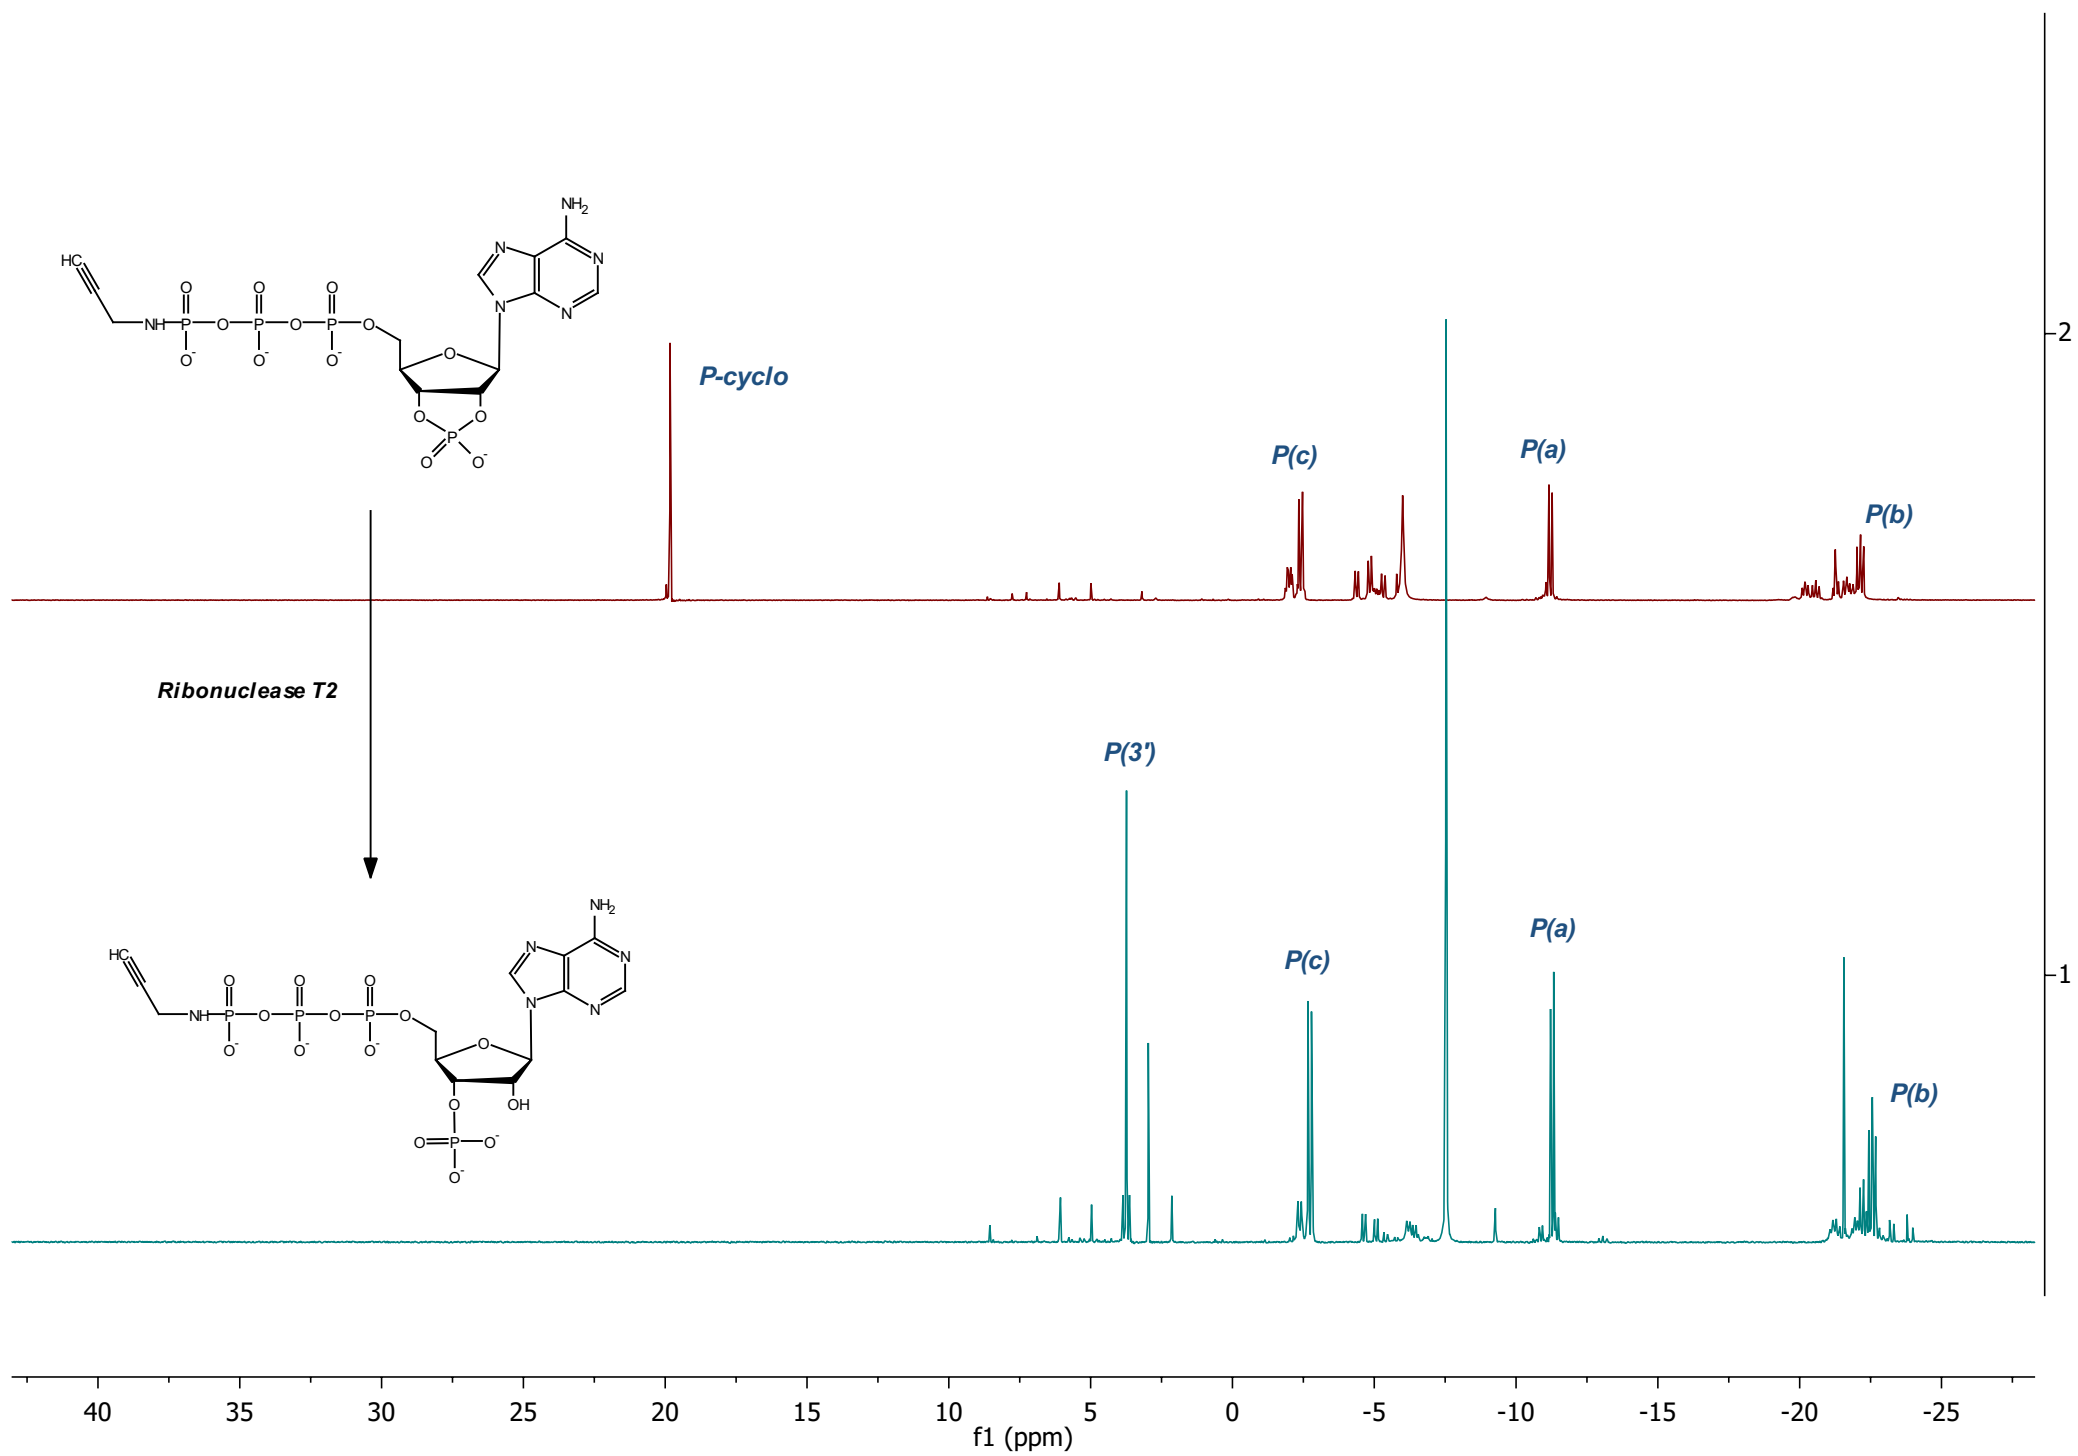

## HRMS (ESI) Analysis of compound 11 (propargylamido-pppAp)

hsjeb65shr1 #1 RT: 0.02 AV: 1 NL: 5.10E7  
T: FTMS - p ESI Full lock ms [100.00-1000.00]

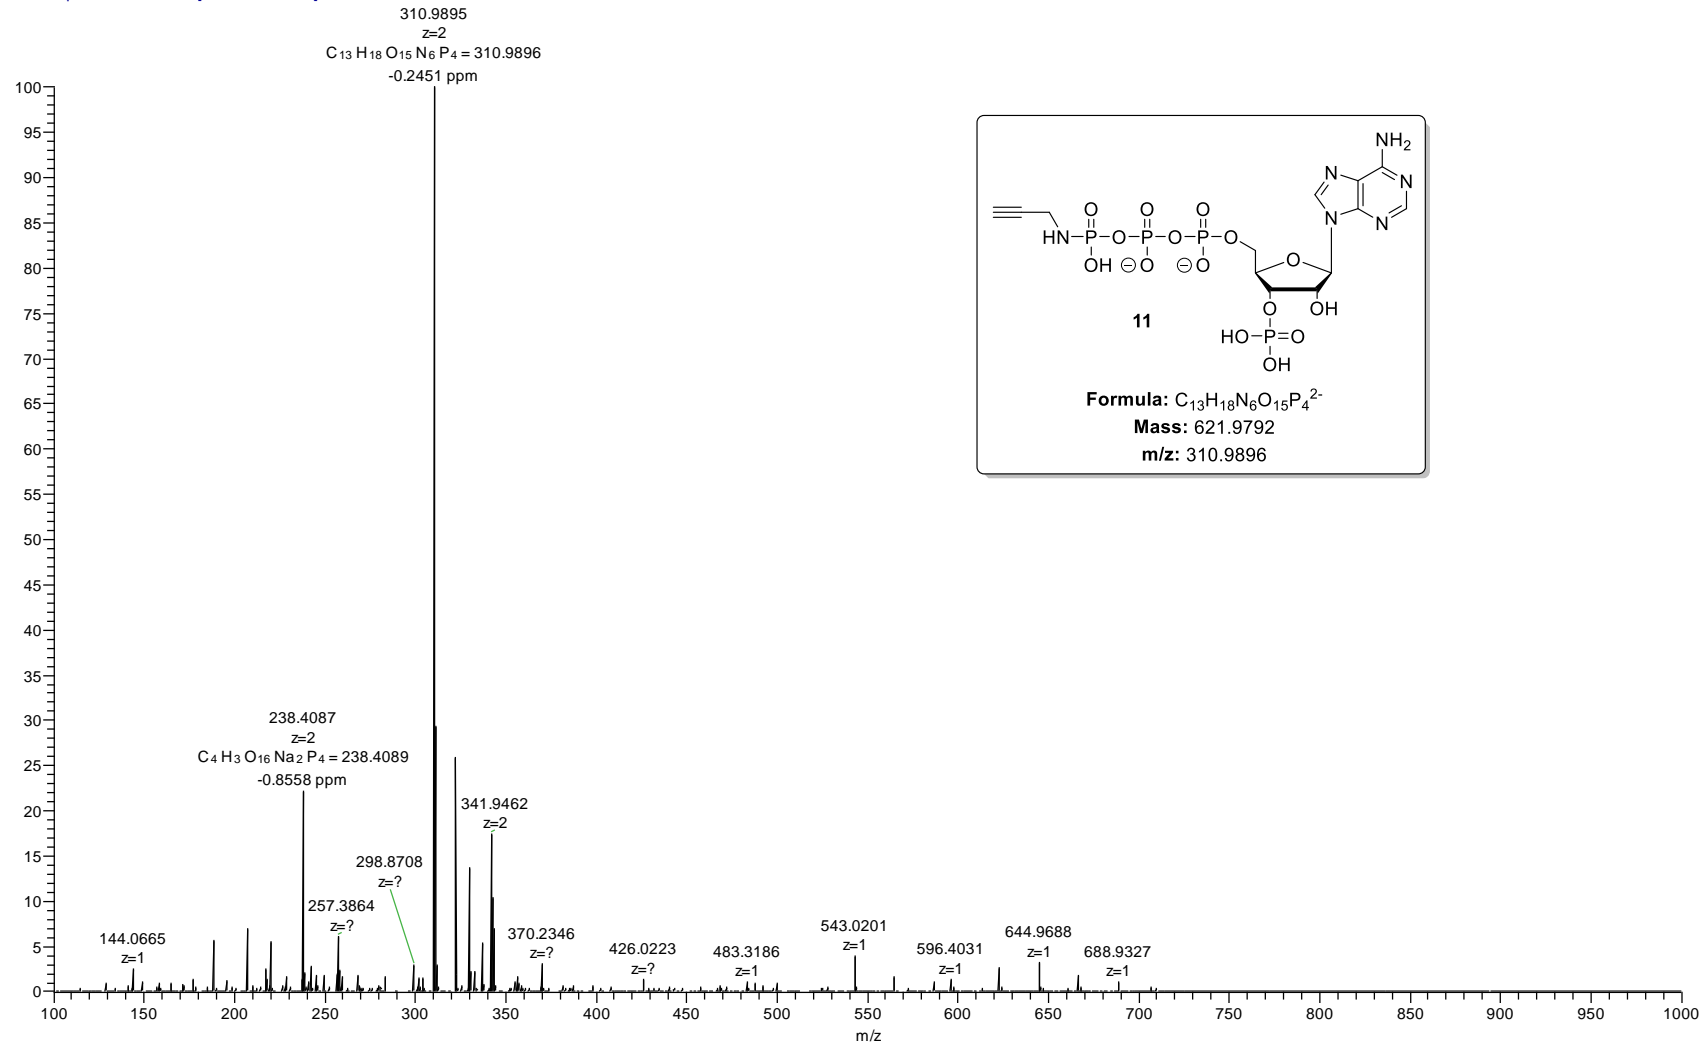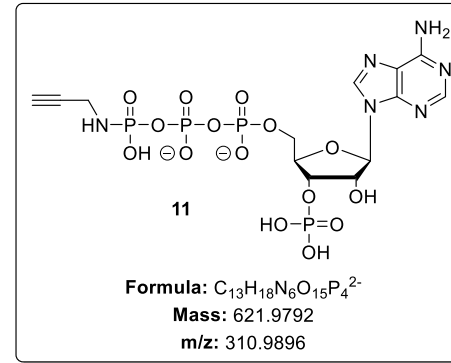

## HRMS (ESI) Analysis of compound 12 (propargylamido-pppGp)

hsjeb66shr2 #1 RT: 0.02 AV: 1 NL: 5.09E6  
T: FTMS - p ESI Full lock ms [100.00-800.00]

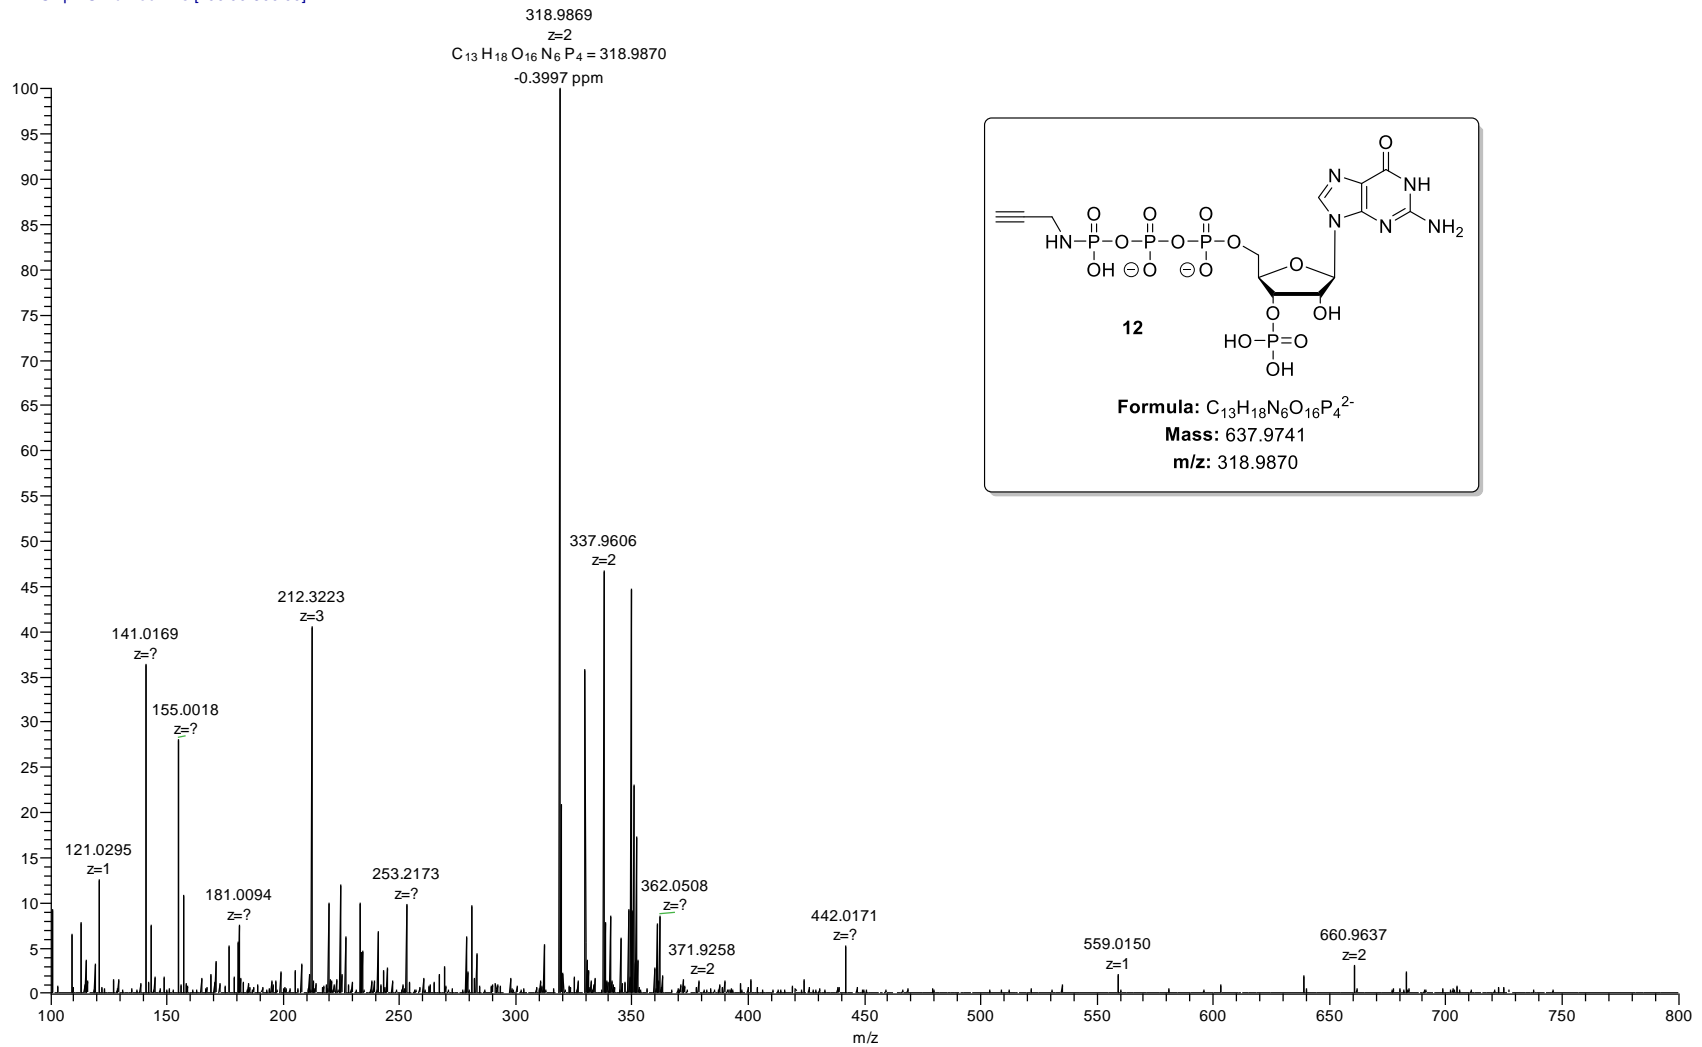

### HRMS (ESI) Analysis of compound 13 (amido-pppAp)

hsjeb74shr1 #1 RT: 0.02 AV: 1 NL: 5.41E5  
T: FTMS - p ESI Full ms [100.00-1400.00]

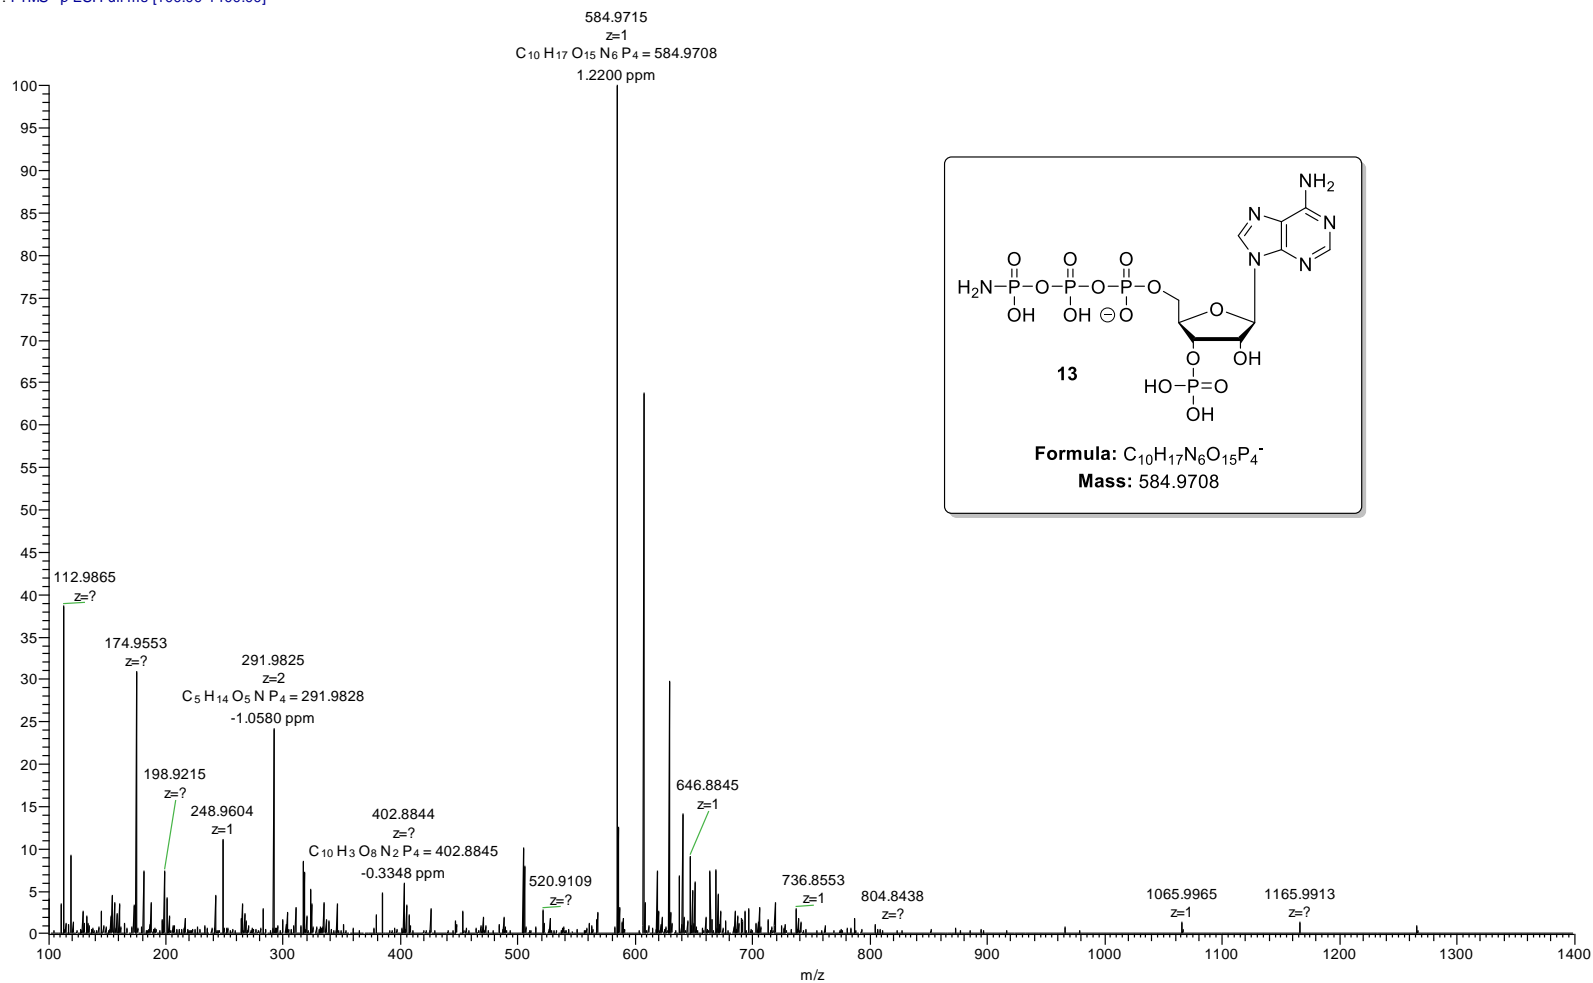

**HRMS (ESI) Analysis of compound 14 (amido-pppGp)**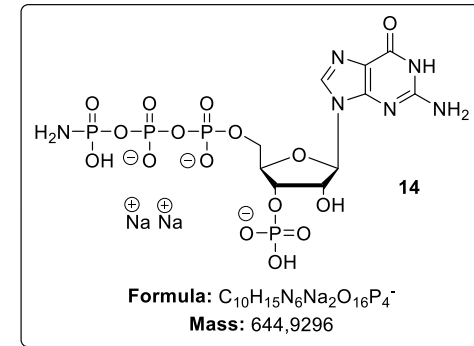**- Scan (rt: 0.019-0.035 min) Sub**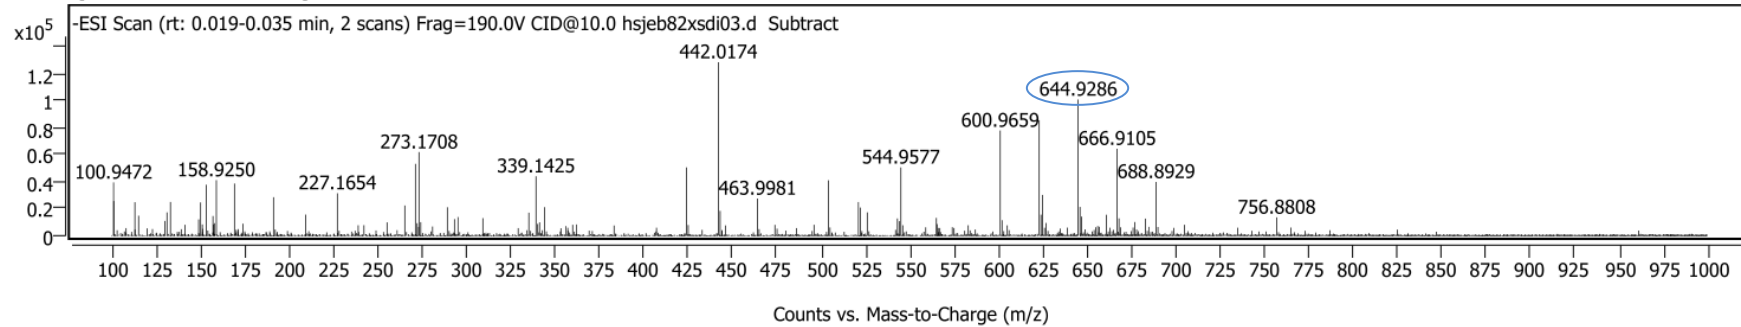

## HRMS (ESI) Analysis of compound 15 (diethylamido-pppAp)

hsjeb73shr3 #1 RT: 0.02 AV: 1 NL: 6.80E5  
T: FTMS - p ESI Full ms [100.00-1400.00]

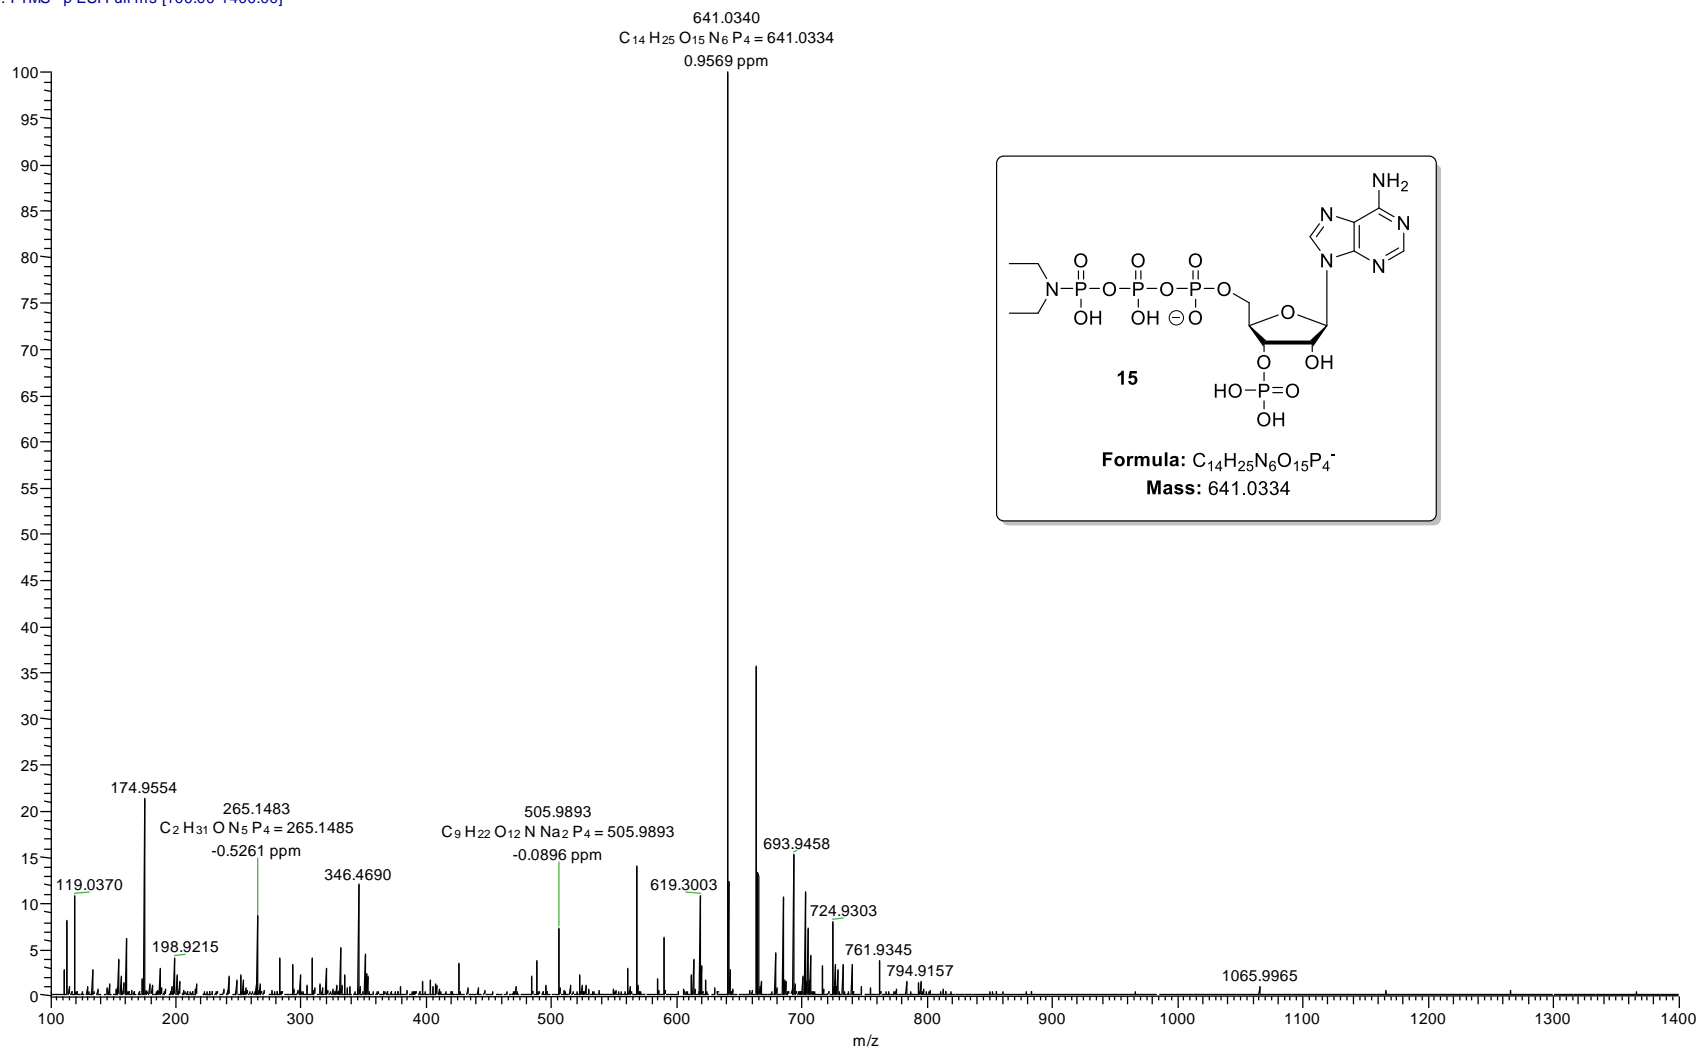

## HRMS (ESI) Analysis of compound 18 (propargylamido-pppApp)

hsjeb69shr6 #1 RT: 0.02 AV: 1 NL: 1.87E5  
T: FTMS + p ESI Full lock ms [100.00-1200.00]

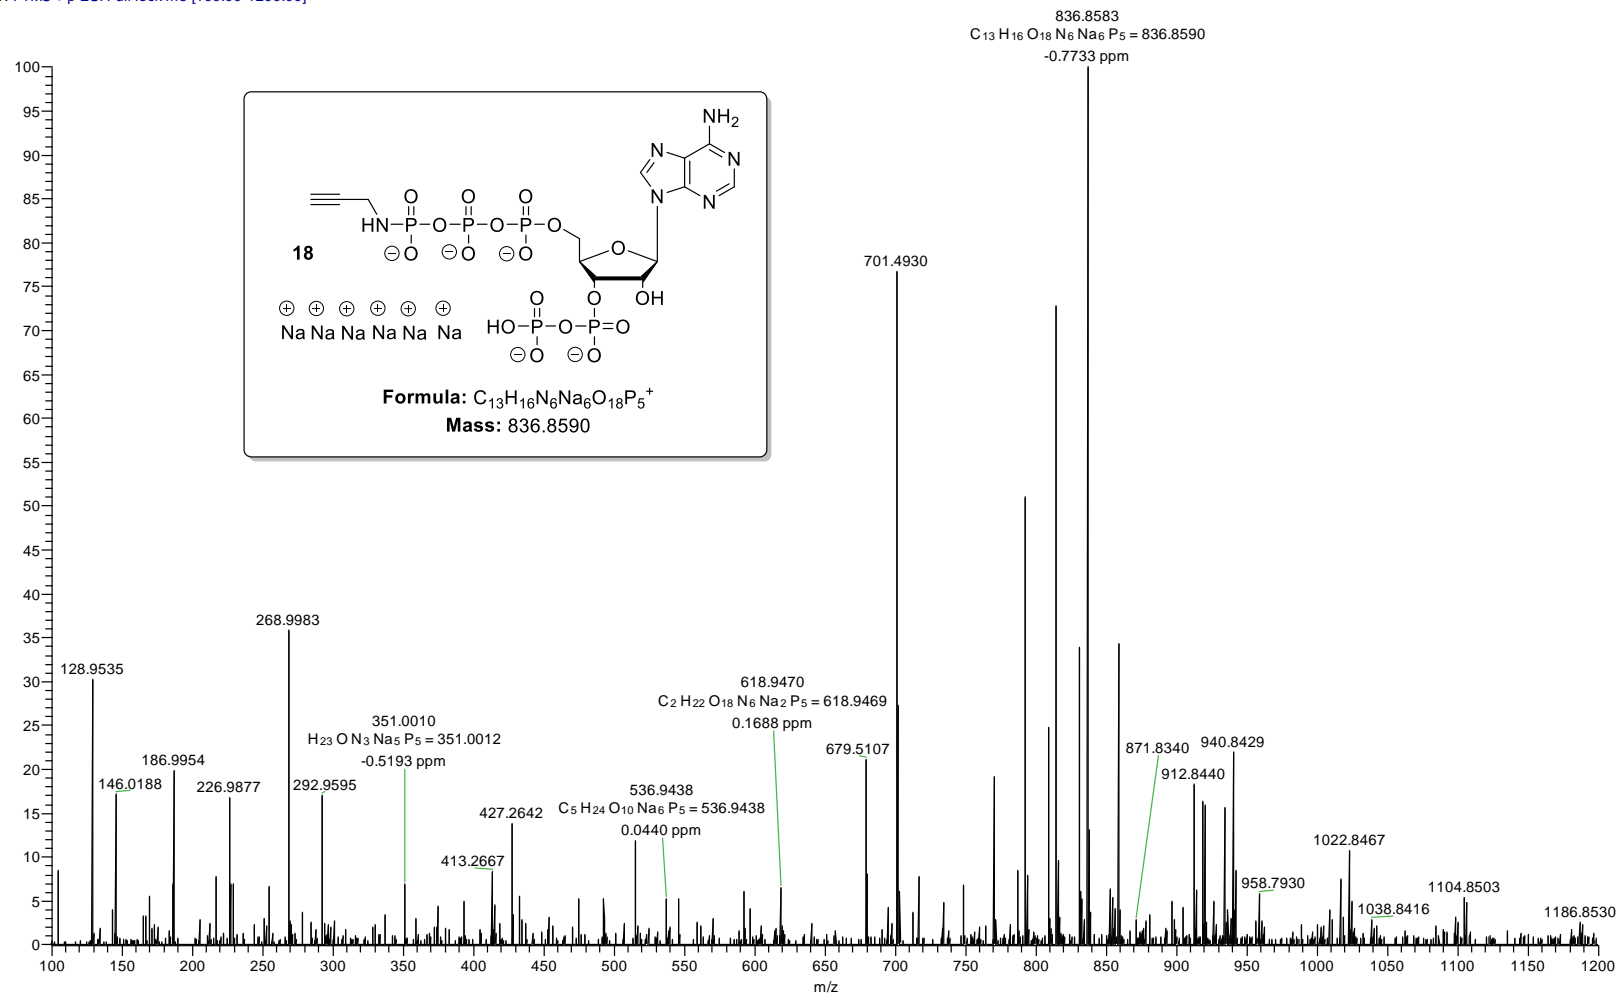

## HRMS (ESI) Analysis of compound 19 (propargylamido-pppGpp)

hsjeb71shr6 #1 RT: 0.02 AV: 1 NL: 5.64E6  
T: FTMS - p ESI Full lock ms [100.00-900.00]

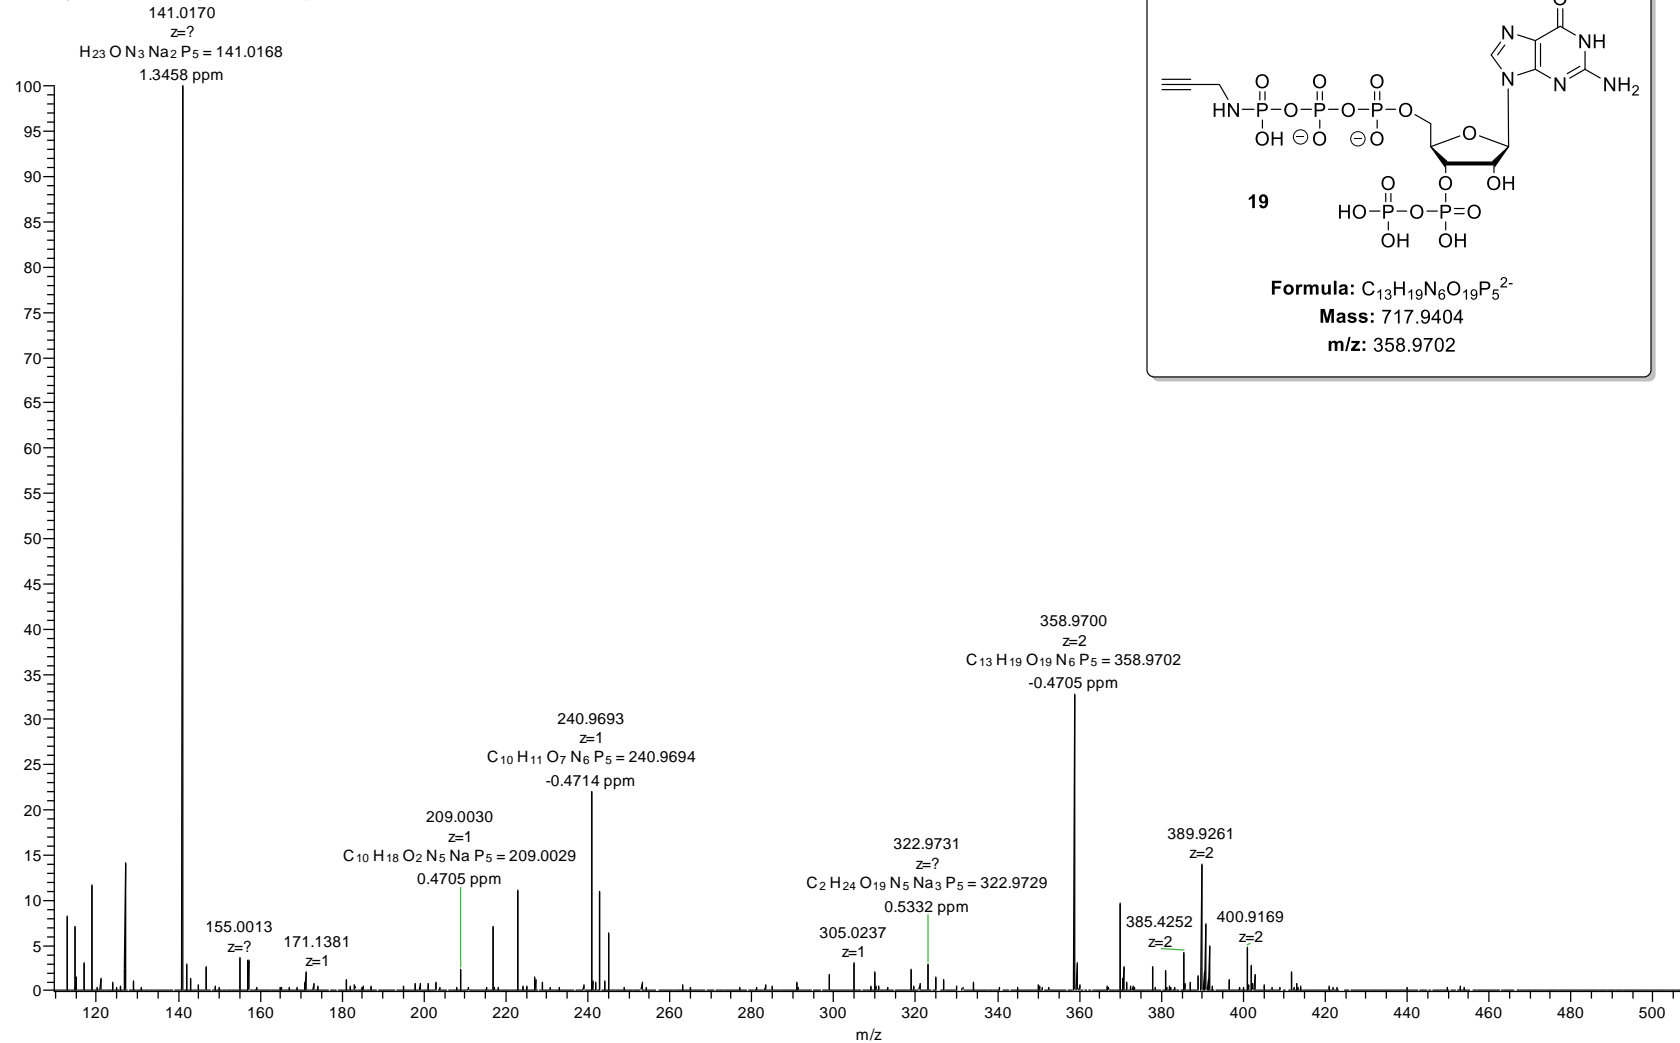



### HRMS (ESI) Analysis of compound 20 (amido-pppApp)

hsjeb77shr9 #1 RT: 0.02 AV: 1 NL: 1.26E6  
T: FTMS - p ESI Full lock ms [100.00-1000.00]

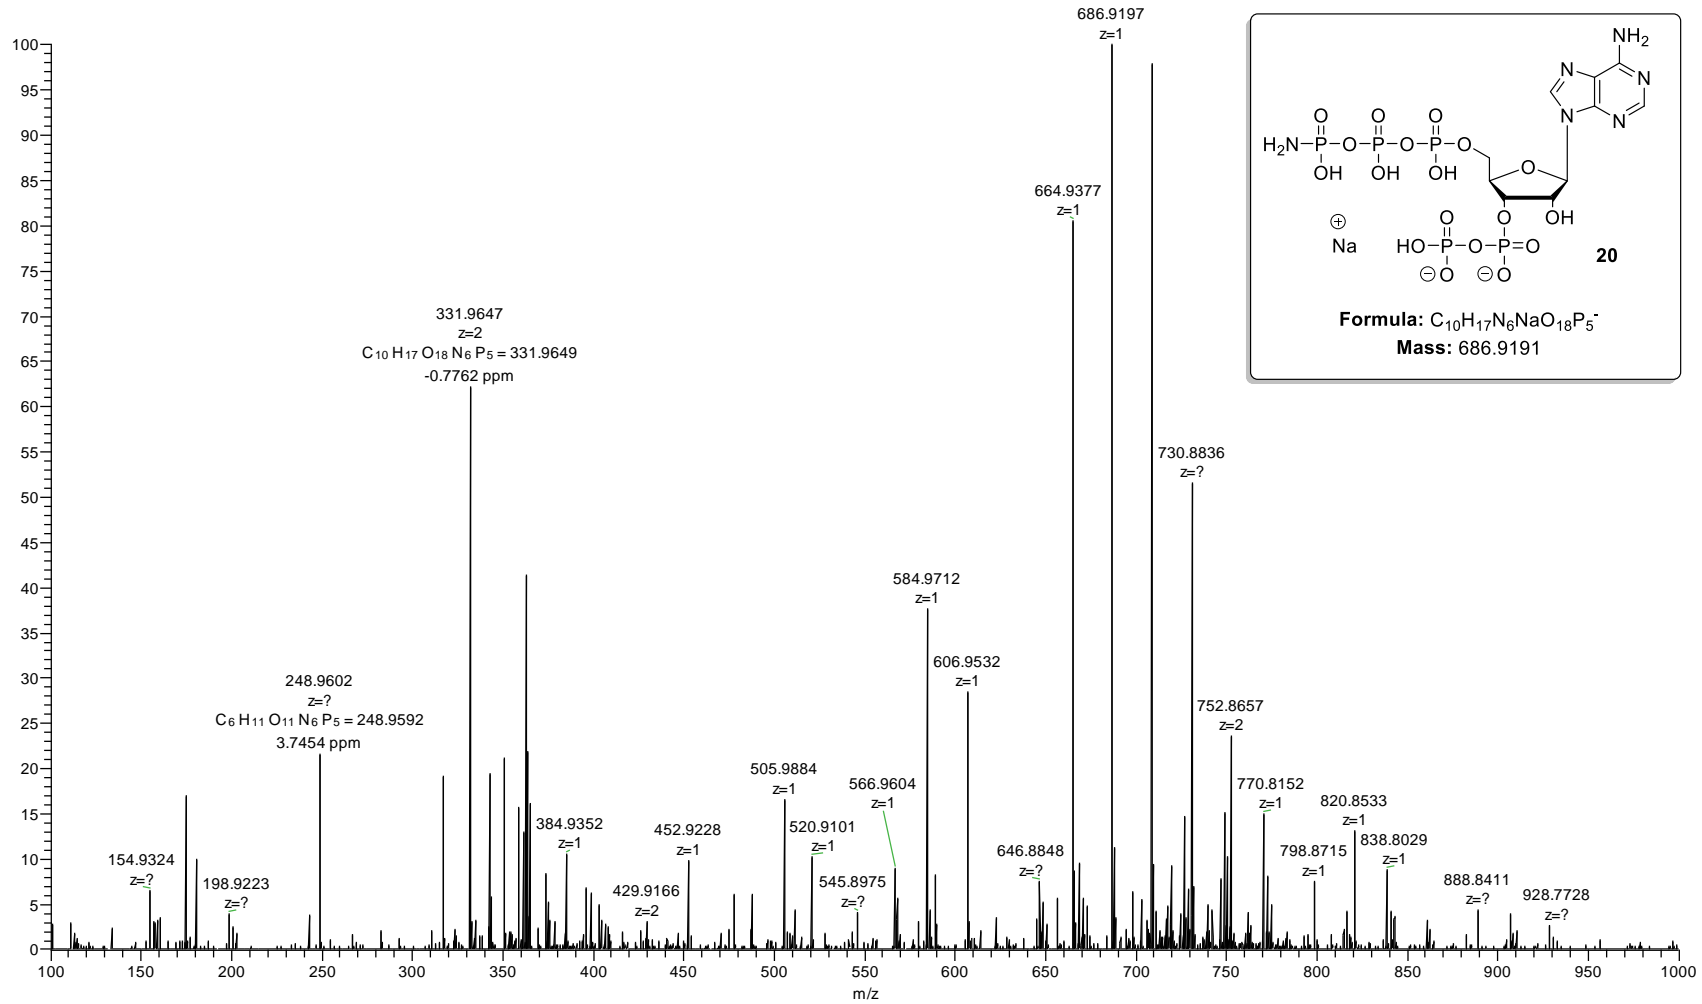

### HRMS (ESI) Analysis of compound 21 (amido-pppGpp)

hsjeb84shr6 #1 RT: 0.02 AV: 1 NL: 5.63E7  
T: FTMS - p ESI Full lock ms [100.00-800.00]

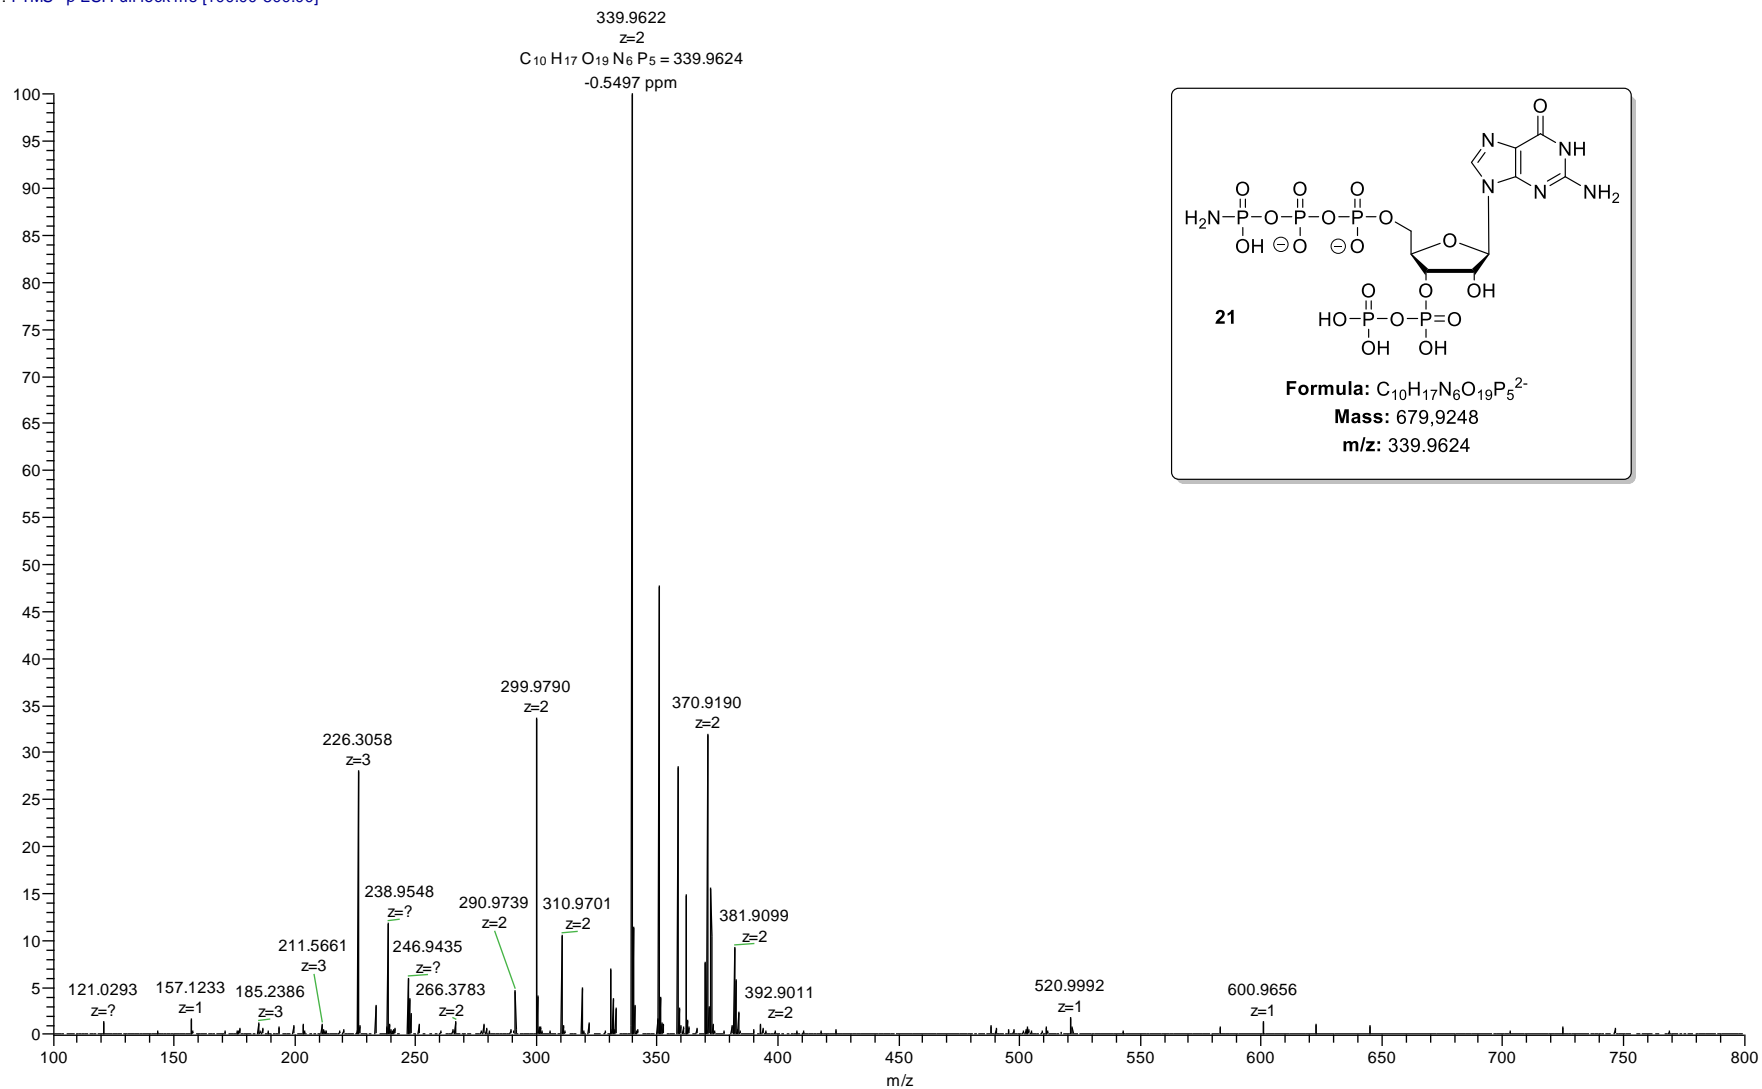

**HRMS (ESI) Analysis of compound 4 (pppApp)**

hsjeb33shr1 #1 RT: 0.02 AV: 1 NL: 1.89E4  
T: FTMS + p ESI Full lock ms [100.00-1300.00]

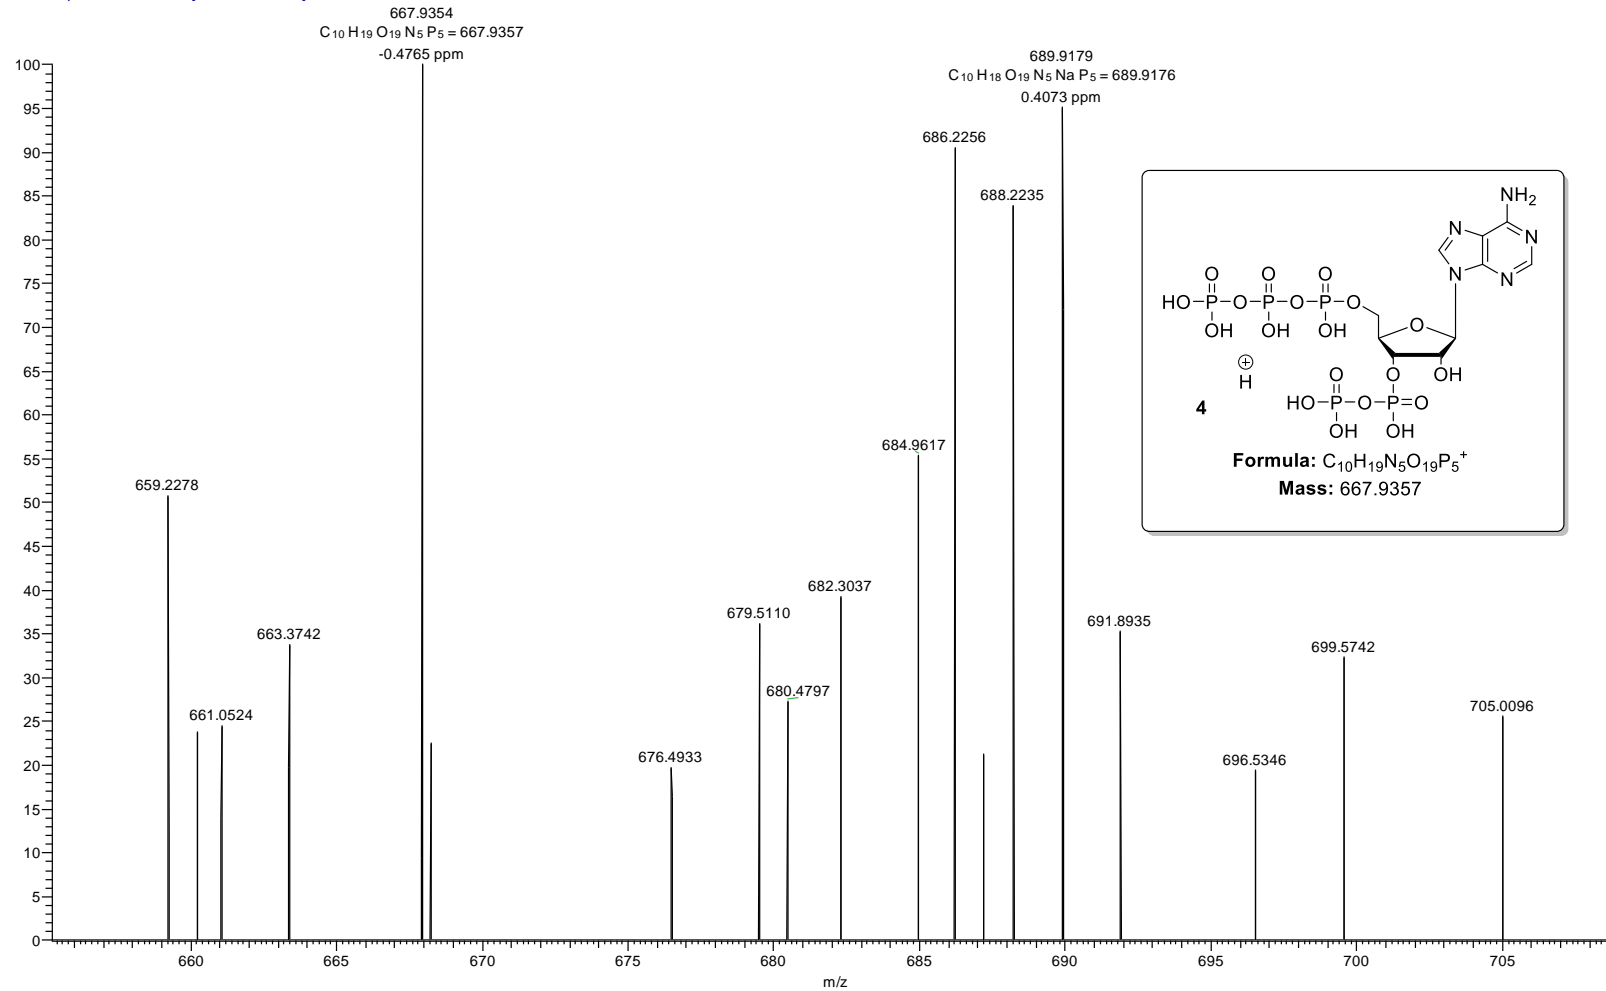

**HRMS (ESI) Analysis of compound 22 ( $^{18}\text{O}$ -pppApp)**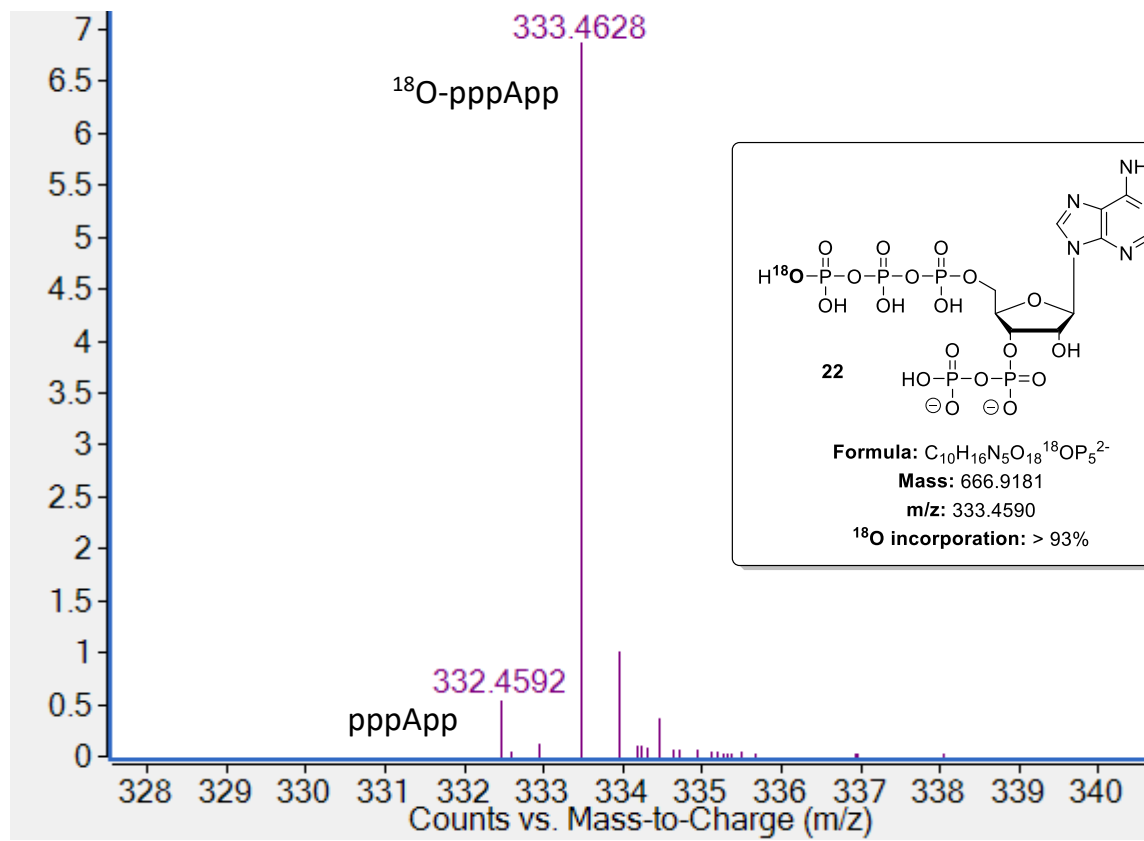

### HRMS (ESI) Analysis of compound 3 (pppGpp)

hsjeb72shr3 #1 RT: 0.03 AV: 1 NL: 2.23E5  
T: FTMS - p ESI Full lock ms [150.00-700.00]

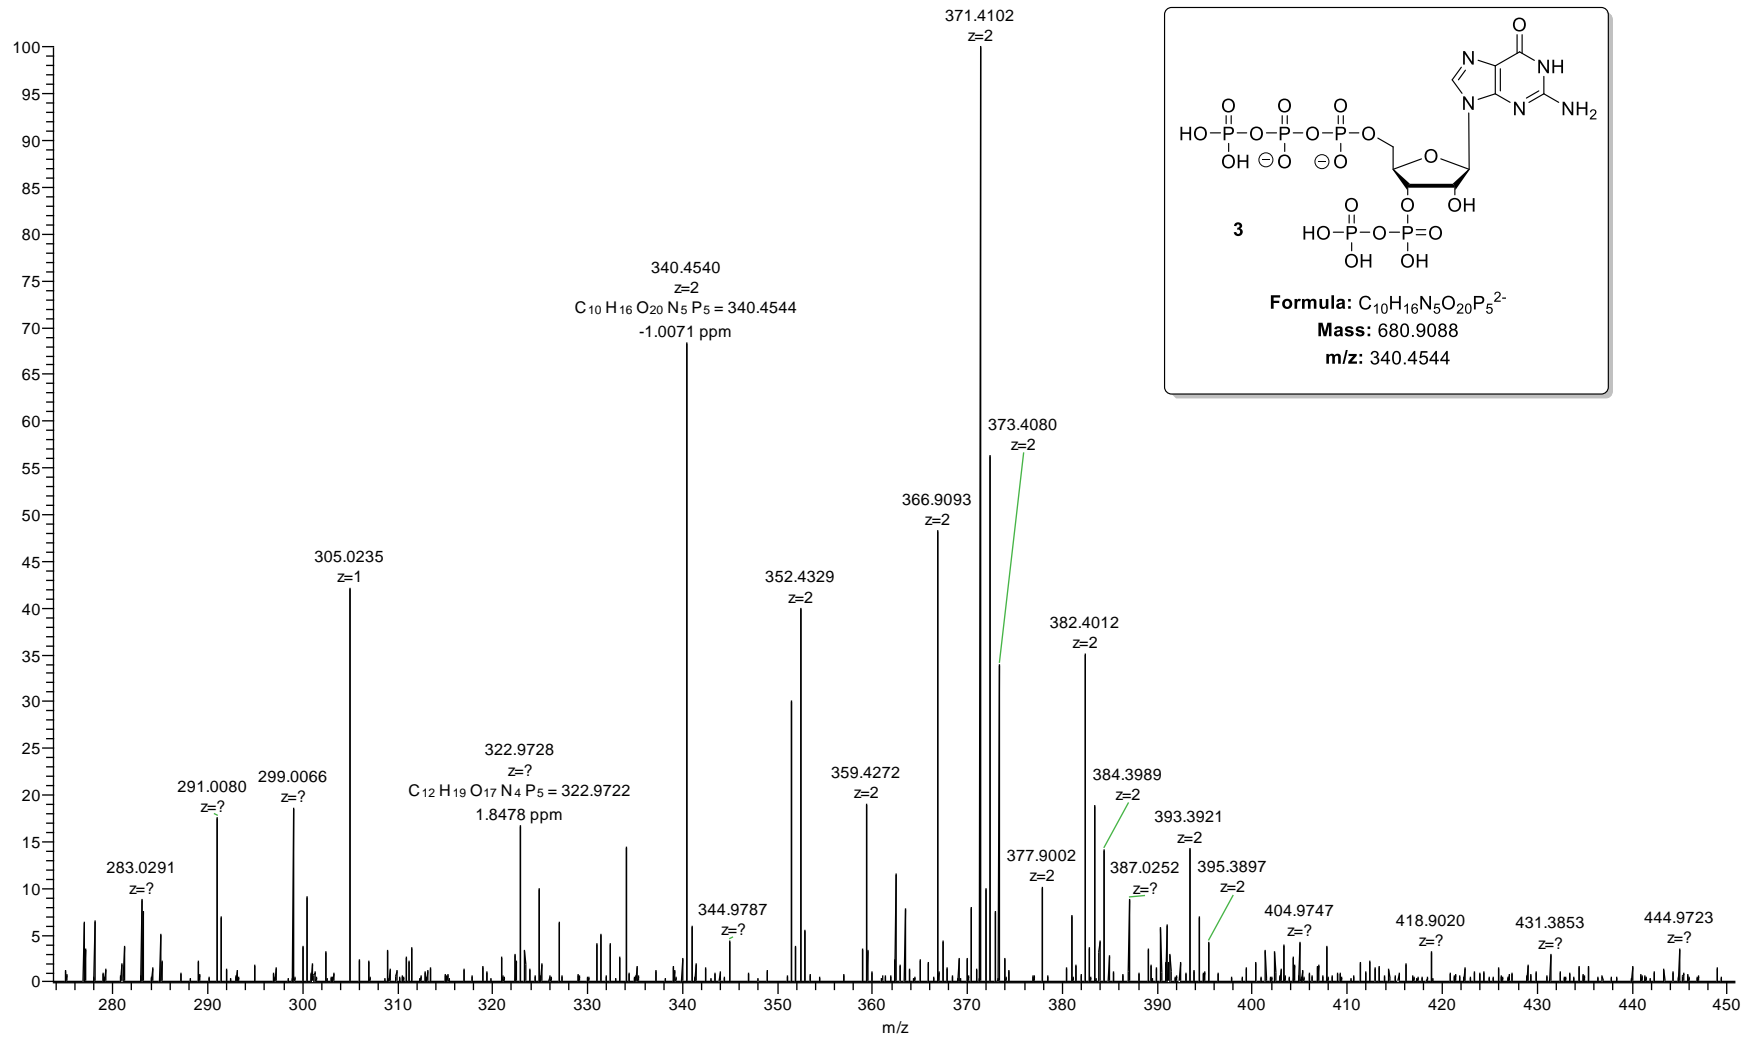

## HRMS (ESI) Analysis of compound 23 (biotin - pppApp)

hsjeb76shr9 #1 RT: 0.03 AV: 1 NL: 4.48E5  
T: FTMS - p ESI sid=20.00 Full ms [120.00-1400.00]

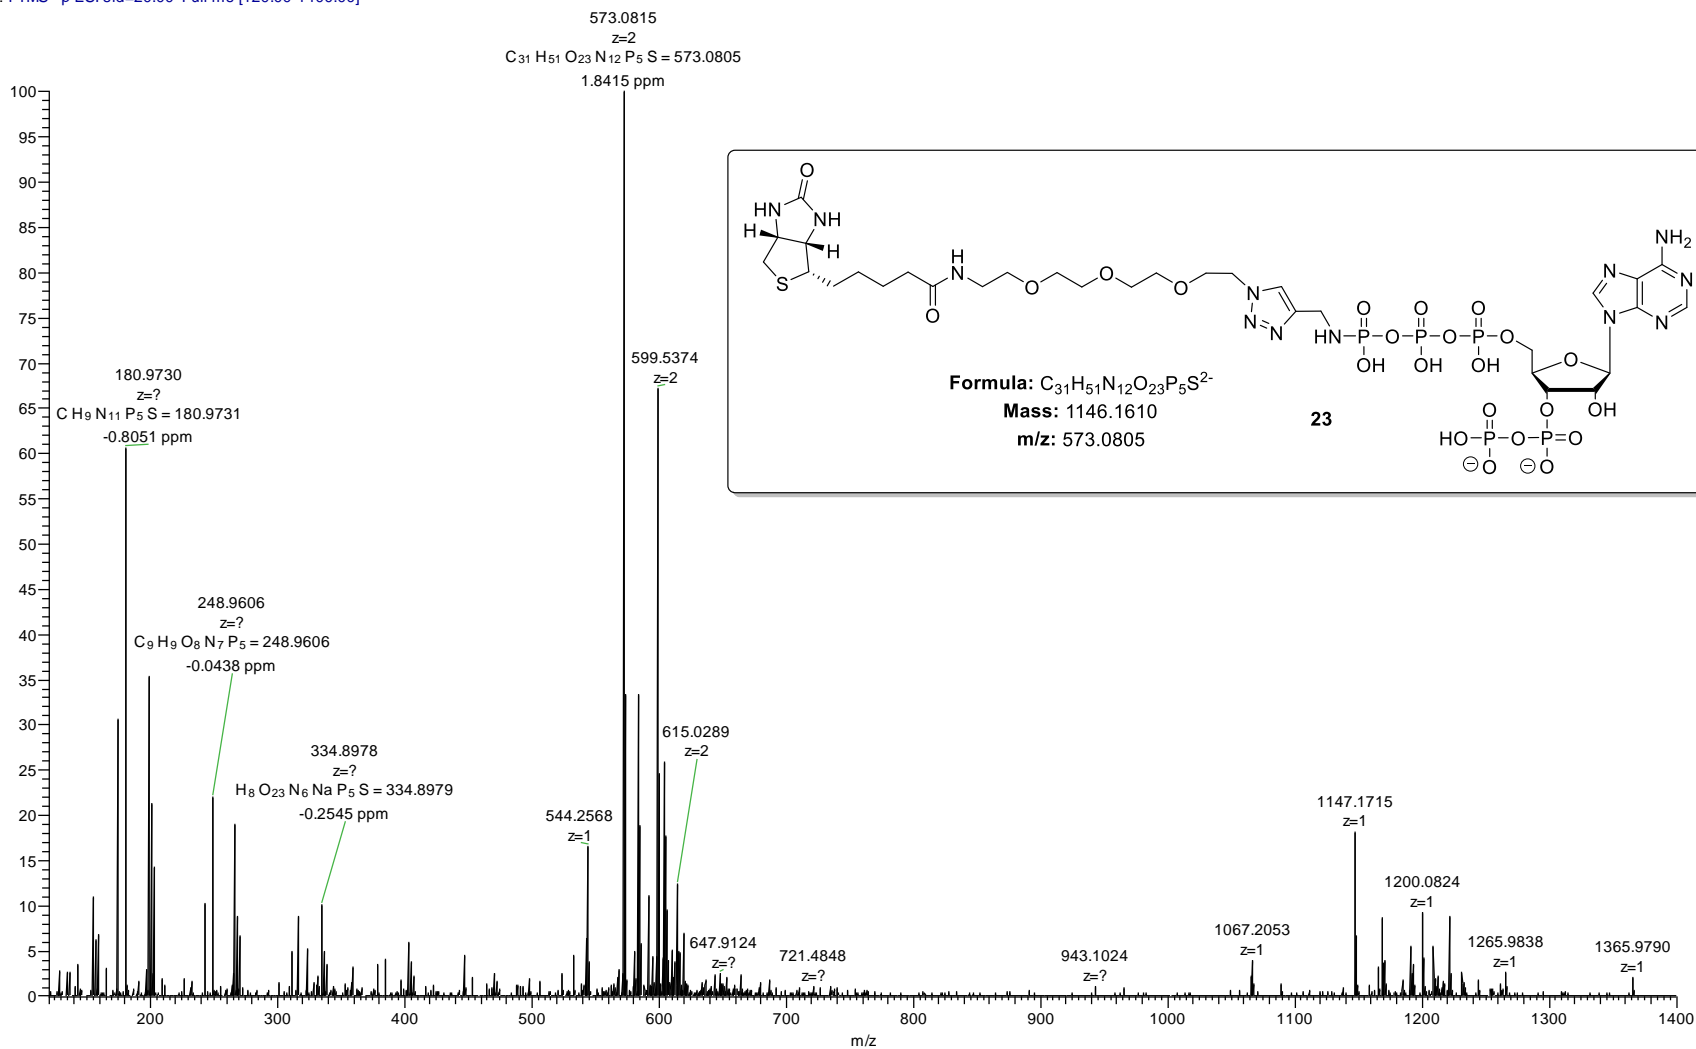

## HRMS (ESI) Analysis of compound 24 (fluorophor - pppApp)

hsjeb75shr4 #1 RT: 0.03 AV: 1 NL: 2.63E5  
T: FTMS + p ESI sid=30.00 Full ms [400.00-3000.00]

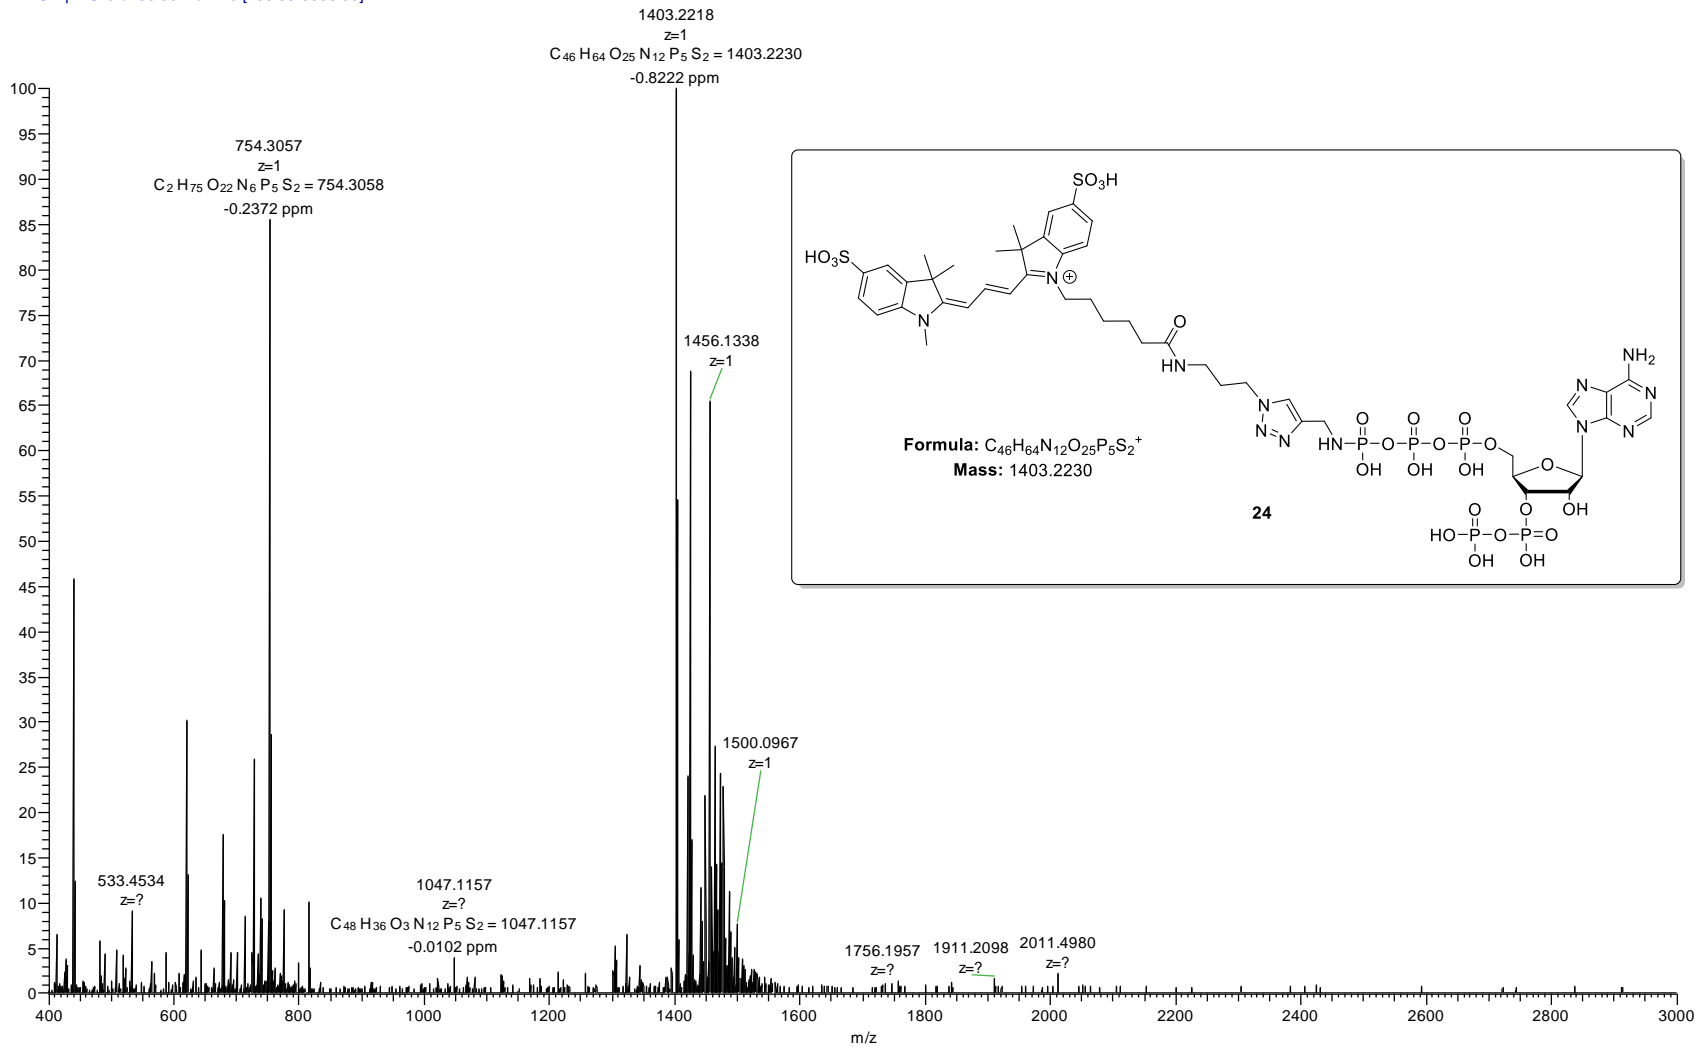

## HPLC-MS Analysis of compound 23 (biotin-PEG<sub>3</sub>-triazolmethan-amino-pppApp)

**HPLC-MS-System:** Dionex Ultimate 3000 – MSQ Plus, C18-AQ-column, WVL: 254 nm

**Gradient:** A (H<sub>2</sub>O) / B (MeCN) / C (TEAA, 100 mM)

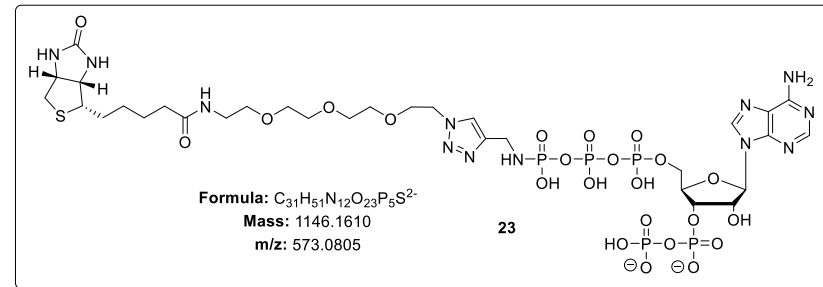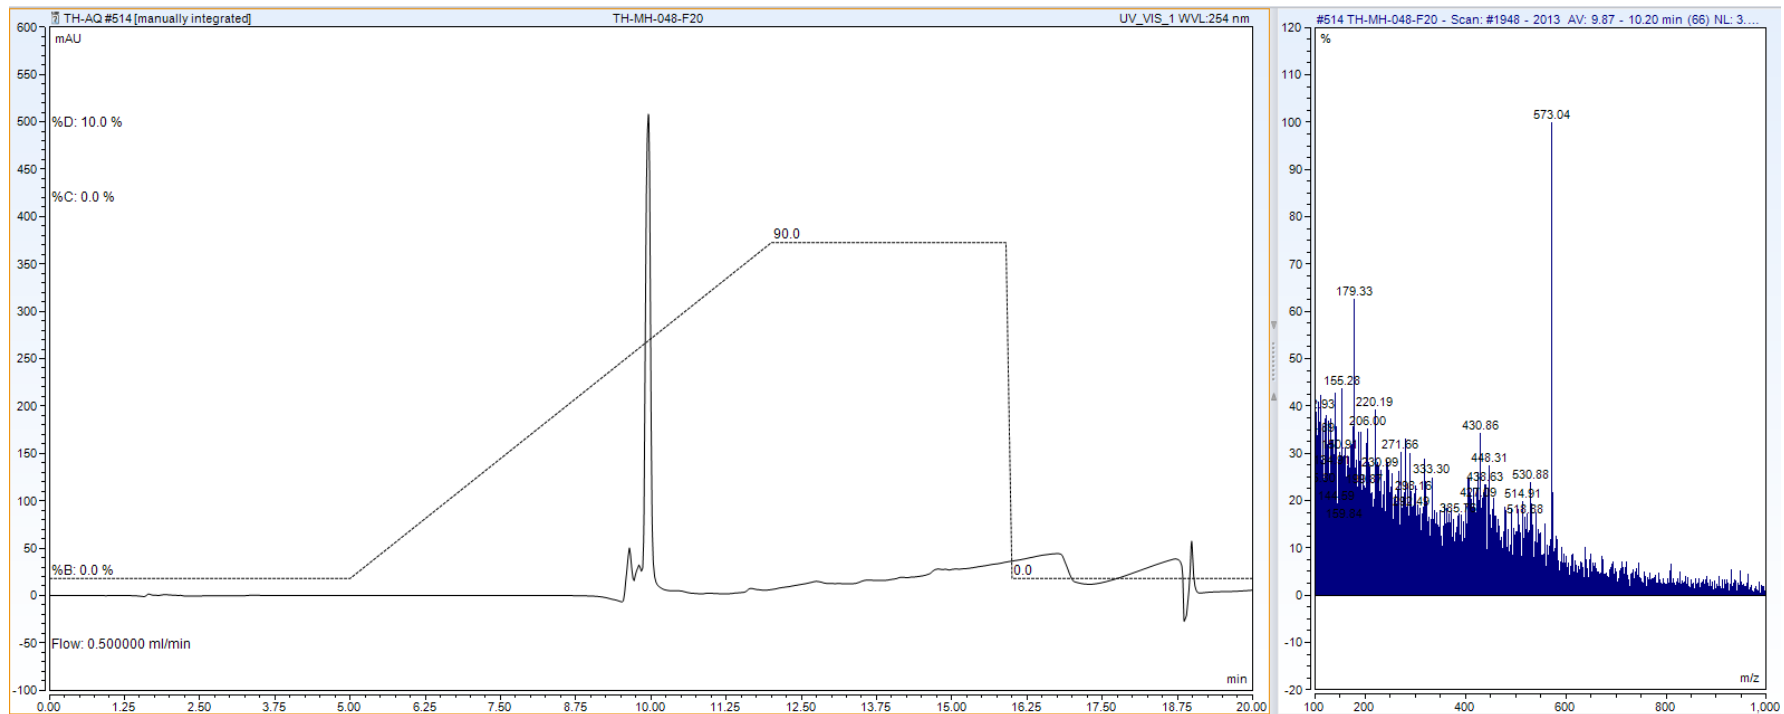



## HPLC-MS Analysis of compound 24 (Sulfo-cyanine3-triazolmethanamo-pppApp)

**HPLC-MS-System:** Dionex Ultimate 3000 – MSQ Plus, C18-AQ-column, WVl: 254 nm

**Gradient:** A (H<sub>2</sub>O) / B (MeCN) / C (TEAA, 100 mM)

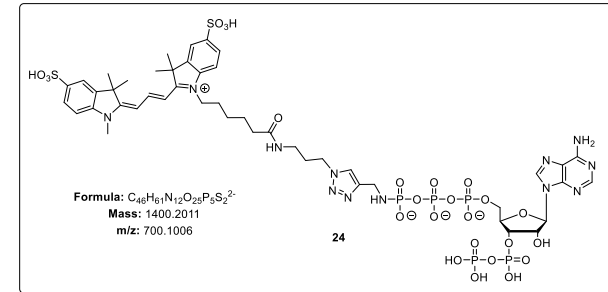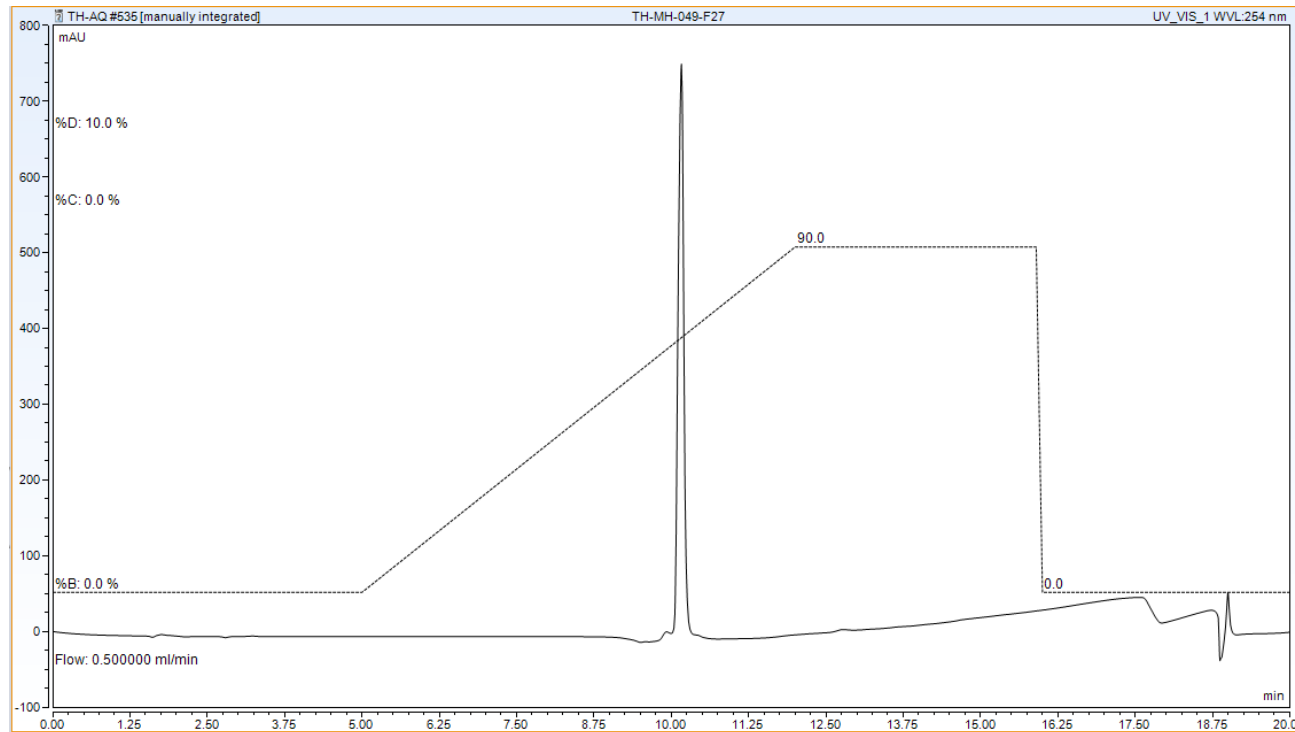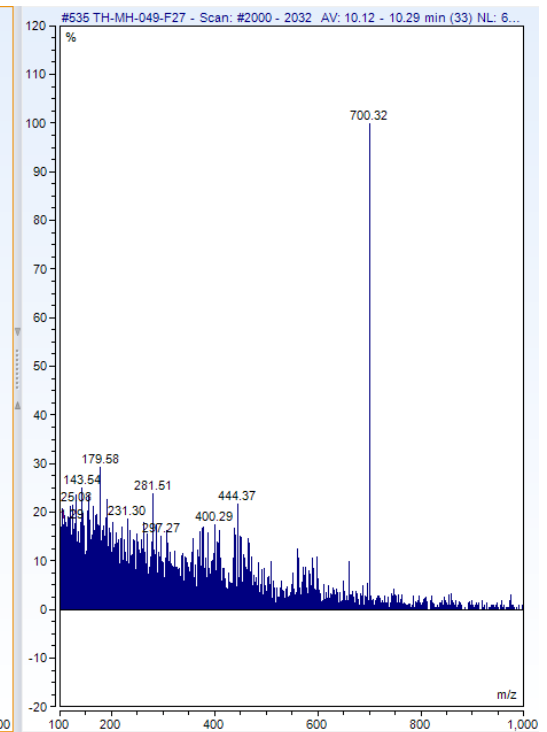

Supplement: jo0c00841_si_001.pdf [file jo0c00841_si_001.pdf]
